# Supplementary material for: Dinitrogen binding and activation at a molybdenum–iron–sulfur cluster
Source: Springer Nature journal article supplement (doi:10.1038/s41557-021-00701-6), 2021-05-27
Supplement: 41557_2021_701_MOESM4_ESM.cif [file 41557_2021_701_MOESM4_ESM.cif]

data_2
_audit_creation_date               2019-11-19
_audit_creation_method
;
Olex2 1.2
(compiled 2018.05.29 svn.r3508 for OlexSys, GUI svn.r5506)
;
_shelx_SHELXL_version_number       '2018/1'
_audit_contact_author_address      ?
_audit_contact_author_email        ?
_audit_contact_author_name         ''
_audit_contact_author_phone        ?
_publ_contact_author_id_orcid      ?
_publ_section_references
;
Dolomanov, O.V., Bourhis, L.J., Gildea, R.J, Howard, J.A.K. & Puschmann, H.
 (2009), J. Appl. Cryst. 42, 339-341.

Sheldrick, G.M. (2015). Acta Cryst. A71, 3-8.

Sheldrick, G.M. (2015). Acta Cryst. C71, 3-8.
;
_chemical_name_common              ?
_chemical_name_systematic          ?
_chemical_formula_moiety           'C64 H87 Fe3 Mo N5 S4, 2(C5 H12)'
_chemical_formula_sum              'C74 H111 Fe3 Mo N5 S4'
_chemical_formula_weight           1462.40
_chemical_melting_point            ?
loop_
  _atom_type_symbol
  _atom_type_description
  _atom_type_scat_dispersion_real
  _atom_type_scat_dispersion_imag
  _atom_type_scat_source
 'C' 'C' 0.0033 0.0016 'International Tables Vol C Tables 4.2.6.8 and 6.1.1.4'
 'H' 'H' 0.0000 0.0000 'International Tables Vol C Tables 4.2.6.8 and 6.1.1.4'
 'Fe' 'Fe' 0.3463 0.8444 'International Tables Vol C Tables 4.2.6.8 and 6.1.1.4'
 'Mo' 'Mo' -1.6832 0.6857
 'International Tables Vol C Tables 4.2.6.8 and 6.1.1.4'
 'N' 'N' 0.0061 0.0033 'International Tables Vol C Tables 4.2.6.8 and 6.1.1.4'
 'S' 'S' 0.1246 0.1234 'International Tables Vol C Tables 4.2.6.8 and 6.1.1.4'

_shelx_space_group_comment
;
The symmetry employed for this shelxl refinement is uniquely defined
by the following loop, which should always be used as a source of
symmetry information in preference to the above space-group names.
They are only intended as comments.
;
_space_group_crystal_system        'monoclinic'
_space_group_IT_number             15
_space_group_name_H-M_alt          'C 1 2/c 1'
_space_group_name_Hall             '-C 2yc'
loop_
  _space_group_symop_operation_xyz
 'x, y, z'
 '-x, y, -z+1/2'
 'x+1/2, y+1/2, z'
 '-x+1/2, y+1/2, -z+1/2'
 '-x, -y, -z'
 'x, -y, z-1/2'
 '-x+1/2, -y+1/2, -z'
 'x+1/2, -y+1/2, z-1/2'

_cell_length_a                     41.828(3)
_cell_length_b                     14.7749(8)
_cell_length_c                     27.6560(19)
_cell_angle_alpha                  90
_cell_angle_beta                   118.395(2)
_cell_angle_gamma                  90
_cell_volume                       15035.3(17)
_cell_formula_units_Z              8
_cell_measurement_reflns_used      9944
_cell_measurement_temperature      100(2)
_cell_measurement_theta_max        31.56
_cell_measurement_theta_min        2.41
_shelx_estimated_absorpt_T_max     0.796
_shelx_estimated_absorpt_T_min     0.597
_exptl_absorpt_coefficient_mu      0.884
_exptl_absorpt_correction_T_max    0.3593
_exptl_absorpt_correction_T_min    0.3065
_exptl_absorpt_correction_type     multi-scan
_exptl_absorpt_process_details
;
SADABS-2016/2 (Bruker,2016/2) was used for absorption correction.
wR2(int) was 0.0980 before and 0.0620 after correction.
The Ratio of minimum to maximum transmission is 0.8530.
The \l/2 correction factor is Not present.
;
_exptl_absorpt_special_details     ?
_exptl_crystal_colour              brown
_exptl_crystal_colour_primary      brown
_exptl_crystal_density_diffrn      1.292
_exptl_crystal_density_meas        ?
_exptl_crystal_density_method      ?
_exptl_crystal_description         'needle'
_exptl_crystal_F_000               6192
_exptl_crystal_size_max            0.65
_exptl_crystal_size_mid            0.28
_exptl_crystal_size_min            0.27
_exptl_transmission_factor_max     ?
_exptl_transmission_factor_min     ?
_diffrn_reflns_av_R_equivalents    0.0557
_diffrn_reflns_av_unetI/netI       0.0257
_diffrn_reflns_Laue_measured_fraction_full  1.000
_diffrn_reflns_Laue_measured_fraction_max  0.996
_diffrn_reflns_limit_h_max         61
_diffrn_reflns_limit_h_min         -61
_diffrn_reflns_limit_k_max         21
_diffrn_reflns_limit_k_min         -19
_diffrn_reflns_limit_l_max         40
_diffrn_reflns_limit_l_min         -40
_diffrn_reflns_number              407207
_diffrn_reflns_point_group_measured_fraction_full  1.000
_diffrn_reflns_point_group_measured_fraction_max  0.996
_diffrn_reflns_theta_full          25.242
_diffrn_reflns_theta_max           31.603
_diffrn_reflns_theta_min           1.485
_diffrn_ambient_temperature        100.0
_diffrn_detector_area_resol_mean   7.4
_diffrn_measured_fraction_theta_full  1.000
_diffrn_measured_fraction_theta_max  0.996
_diffrn_measurement_device_type    'Bruker APEX-II CCD'
_diffrn_measurement_method         '\f and \w scans'
_diffrn_radiation_type             MoK\a
_diffrn_radiation_wavelength       0.71073
_diffrn_source                     'I\mS micro-focus sealed tube, multilayer optics' 
_diffrn_standards_number           0
_reflns_Friedel_coverage           0.000
_reflns_Friedel_fraction_full      .
_reflns_Friedel_fraction_max       .
_reflns_number_gt                  20518
_reflns_number_total               25148
_reflns_special_details
;
 Reflections were merged by SHELXL according to the crystal
 class for the calculation of statistics and refinement.
 
 _reflns_Friedel_fraction is defined as the number of unique
 Friedel pairs measured divided by the number that would be
 possible theoretically, ignoring centric projections and
 systematic absences.
;
_reflns_threshold_expression       'I > 2\s(I)'
_computing_cell_refinement         ?
_computing_data_collection         ?
_computing_data_reduction          ?
_computing_molecular_graphics      'Olex2 (Dolomanov et al., 2009)'
_computing_publication_material    'Olex2 (Dolomanov et al., 2009)'
_computing_structure_refinement    'ShelXL (Sheldrick, 2015)'
_computing_structure_solution      'ShelXT (Sheldrick, 2015)'
_refine_diff_density_max           1.218
_refine_diff_density_min           -0.691
_refine_diff_density_rms           0.079
_refine_ls_extinction_coef         .
_refine_ls_extinction_method       none
_refine_ls_goodness_of_fit_ref     1.110
_refine_ls_hydrogen_treatment      constr
_refine_ls_matrix_type             full
_refine_ls_number_parameters       946
_refine_ls_number_reflns           25148
_refine_ls_number_restraints       1542
_refine_ls_R_factor_all            0.0459
_refine_ls_R_factor_gt             0.0340
_refine_ls_restrained_S_all        1.091
_refine_ls_shift/su_max            0.003
_refine_ls_shift/su_mean           0.000
_refine_ls_structure_factor_coef   Fsqd
_refine_ls_weighting_details      
 'w=1/[\s^2^(Fo^2^)+(0.0363P)^2^+18.0369P] where P=(Fo^2^+2Fc^2^)/3'
_refine_ls_weighting_scheme        calc
_refine_ls_wR_factor_gt            0.0800
_refine_ls_wR_factor_ref           0.0844
_refine_special_details            ?
_olex2_refinement_description
;
1. Fixed Uiso
 At 1.2 times of:
  All C(H) groups, All C(H,H) groups
 At 1.5 times of:
  All C(H,H,H) groups
2. Restrained distances
 C901-C902 \\sim C902-C903 \\sim C903-C904 \\sim C904-C905
 with sigma of 0.02
 C901-C903 \\sim C902-C904 \\sim C903-C905
 with sigma of 0.02
 C91A-C92A \\sim C92A-C93A \\sim C93A-C94A \\sim C94A-C95A
 with sigma of 0.02
 C91A-C93A \\sim C92A-C94A \\sim C93A-C95A
 with sigma of 0.02
 C801-C802 \\sim C802-C803 \\sim C803-C804 \\sim C804-C805
 with sigma of 0.02
 C801-C803 \\sim C802-C804 \\sim C803-C805
 with sigma of 0.02
 C701-C702 \\sim C702-C703 \\sim C703-C704 \\sim C704-C705
 with sigma of 0.02
 C701-C703 \\sim C702-C704 \\sim C703-C705
 with sigma of 0.02
3. Uiso/Uaniso restraints and constraints
All non-hydrogen atoms have similar U: within 2A with sigma of 0.04 and sigma
for terminal atoms of 0.08
4. Rigid body (RIGU) restrains
 All non-hydrogen atoms
 with sigma for 1-2 distances of 0.004 and sigma for 1-3 distances of 0.004
5. Others
 Sof(H36A)=Sof(C62C)=Sof(H62A)=Sof(H62B)=Sof(H62C)=Sof(C63C)=Sof(H63A)=
 Sof(H63B)=Sof(H63C)=1-FVAR(1)
 Sof(H361)=Sof(C362)=Sof(H36B)=Sof(H36C)=Sof(H36D)=Sof(C363)=Sof(H36E)=
 Sof(H36F)=Sof(H36G)=FVAR(1)
 Sof(H56A)=Sof(C62E)=Sof(H62D)=Sof(H62E)=Sof(H62F)=Sof(C63E)=Sof(H63D)=
 Sof(H63E)=Sof(H63F)=1-FVAR(2)
 Sof(H561)=Sof(C562)=Sof(H56B)=Sof(H56C)=Sof(H56D)=Sof(C563)=Sof(H56E)=
 Sof(H56F)=Sof(H56G)=FVAR(2)
 Sof(C91A)=Sof(H91A)=Sof(H91B)=Sof(H91C)=Sof(C92A)=Sof(H92A)=Sof(H92B)=
 Sof(C93A)=Sof(H93A)=Sof(H93B)=Sof(C94A)=Sof(H94A)=Sof(H94B)=Sof(C95A)=
 Sof(H95A)=Sof(H95B)=Sof(H95C)=1-FVAR(3)
 Sof(C901)=Sof(H90A)=Sof(H90B)=Sof(H90C)=Sof(C902)=Sof(H90D)=Sof(H90E)=
 Sof(C903)=Sof(H90F)=Sof(H90G)=Sof(C904)=Sof(H90H)=Sof(H90I)=Sof(C905)=
 Sof(H90J)=Sof(H90K)=Sof(H90L)=FVAR(3)
 Fixed Sof: C804(0.5) H80A(0.5) H80B(0.5) C801(0.5) H80C(0.5) H80D(0.5)
 H80E(0.5) C705(0.5) H70A(0.5) H70B(0.5) H70C(0.5) C704(0.5) H70D(0.5)
 H70E(0.5) C703(0.5) H70F(0.5) H70G(0.5) C702(0.5) H70H(0.5) H70I(0.5)
 C701(0.5) H70J(0.5) H70K(0.5) H70L(0.5) C805(0.5) H80F(0.5) H80G(0.5)
 H80H(0.5) C802(0.5) H80I(0.5) H80J(0.5) C803(0.5) H80K(0.5) H80L(0.5)
6.a Ternary CH refined with riding coordinates:
 C221(H221), C261(H261), C321(H321), C361(H361), C361(H36A), C421(H421),
 C461(H461), C521(H521), C561(H561), C561(H56A)
6.b Secondary CH2 refined with riding coordinates:
 C804(H80A,H80B), C704(H70D,H70E), C703(H70F,H70G), C702(H70H,H70I), C902(H90D,
 H90E), C903(H90F,H90G), C904(H90H,H90I), C92A(H92A,H92B), C93A(H93A,H93B),
 C94A(H94A,H94B), C802(H80I,H80J), C803(H80K,H80L)
6.c Aromatic/amide H refined with riding coordinates:
 C12(H12), C13(H13), C23(H23), C24(H24), C25(H25), C33(H33), C34(H34),
 C35(H35), C15(H15), C16(H16), C43(H43), C44(H44), C45(H45), C53(H53), C54(H54),
  C55(H55)
6.d Idealised Me refined as rotating group:
 C6(H6A,H6B,H6C), C7(H7A,H7B,H7C), C8(H8A,H8B,H8C), C9(H9A,H9B,H9C), C10(H10A,
 H10B,H10C), C222(H22A,H22B,H22C), C223(H22D,H22E,H22F), C262(H26A,H26B,H26C),
 C263(H26D,H26E,H26F), C322(H32A,H32B,H32C), C323(H32D,H32E,H32F), C362(H36B,
 H36C,H36D), C363(H36E,H36F,H36G), C62C(H62A,H62B,H62C), C63C(H63A,H63B,H63C),
 C422(H42A,H42B,H42C), C423(H42D,H42E,H42F), C462(H46A,H46B,H46C), C463(H46D,
 H46E,H46F), C522(H52A,H52B,H52C), C523(H52D,H52E,H52F), C801(H80C,H80D,H80E),
 C705(H70A,H70B,H70C), C701(H70J,H70K,H70L), C805(H80F,H80G,H80H), C562(H56B,
 H56C,H56D), C563(H56E,H56F,H56G), C62E(H62D,H62E,H62F), C63E(H63D,H63E,H63F),
 C901(H90A,H90B,H90C), C905(H90J,H90K,H90L), C91A(H91A,H91B,H91C), C95A(H95A,
 H95B,H95C)
;
_atom_sites_solution_hydrogens     geom
_atom_sites_solution_primary       dual
_atom_sites_solution_secondary     ?
loop_
  _atom_site_label
  _atom_site_type_symbol
  _atom_site_fract_x
  _atom_site_fract_y
  _atom_site_fract_z
  _atom_site_U_iso_or_equiv
  _atom_site_adp_type
  _atom_site_occupancy
  _atom_site_site_symmetry_order
  _atom_site_calc_flag
  _atom_site_refinement_flags_posn
  _atom_site_refinement_flags_adp
  _atom_site_refinement_flags_occupancy
  _atom_site_disorder_assembly
  _atom_site_disorder_group
 Mo1 Mo 0.39153(2) 0.30967(2) 0.44057(2) 0.01295(3) Uani 1 1 d . U . . .
 C1 C 0.40669(4) 0.22456(11) 0.52153(6) 0.0206(3) Uani 1 1 d . U . . .
 C2 C 0.37728(4) 0.28135(11) 0.51379(6) 0.0208(3) Uani 1 1 d . U . . .
 C3 C 0.34668(4) 0.25662(12) 0.46304(6) 0.0219(3) Uani 1 1 d . U . . .
 C4 C 0.35693(4) 0.18127(11) 0.44121(6) 0.0211(3) Uani 1 1 d . U . . .
 C5 C 0.39385(4) 0.16145(10) 0.47713(7) 0.0205(3) Uani 1 1 d . U . . .
 C6 C 0.44396(5) 0.22395(15) 0.57045(8) 0.0361(4) Uani 1 1 d . U . . .
 H6A H 0.461601 0.201970 0.559327 0.054 Uiso 1 1 calc GR . . . .
 H6B H 0.444097 0.184001 0.598832 0.054 Uiso 1 1 calc GR . . . .
 H6C H 0.450508 0.285487 0.585110 0.054 Uiso 1 1 calc GR . . . .
 C7 C 0.37840(6) 0.34920(13) 0.55492(7) 0.0321(4) Uani 1 1 d . U . . .
 H7A H 0.401824 0.380779 0.571332 0.048 Uiso 1 1 calc GR . . . .
 H7B H 0.375412 0.318003 0.583782 0.048 Uiso 1 1 calc GR . . . .
 H7C H 0.358711 0.393139 0.536509 0.048 Uiso 1 1 calc GR . . . .
 C8 C 0.30931(5) 0.29751(15) 0.43824(9) 0.0358(4) Uani 1 1 d . U . . .
 H8A H 0.309575 0.350196 0.459954 0.054 Uiso 1 1 calc GR . . . .
 H8B H 0.292061 0.252551 0.438181 0.054 Uiso 1 1 calc GR . . . .
 H8C H 0.301919 0.316430 0.400417 0.054 Uiso 1 1 calc GR . . . .
 C9 C 0.33135(6) 0.12885(14) 0.39128(7) 0.0352(4) Uani 1 1 d . U . . .
 H9A H 0.313460 0.170169 0.364202 0.053 Uiso 1 1 calc GR . . . .
 H9B H 0.318789 0.083080 0.401702 0.053 Uiso 1 1 calc GR . . . .
 H9C H 0.345071 0.099040 0.375293 0.053 Uiso 1 1 calc GR . . . .
 C10 C 0.41479(6) 0.08316(12) 0.47199(9) 0.0351(4) Uani 1 1 d . U . . .
 H10A H 0.405024 0.067121 0.433132 0.053 Uiso 1 1 calc GR . . . .
 H10B H 0.412596 0.031177 0.492227 0.053 Uiso 1 1 calc GR . . . .
 H10C H 0.440441 0.099964 0.487244 0.053 Uiso 1 1 calc GR . . . .
 Fe1 Fe 0.44232(2) 0.42965(2) 0.44724(2) 0.01491(4) Uani 1 1 d . U . . .
 N1 N 0.48601(3) 0.48393(9) 0.48699(5) 0.0187(2) Uani 1 1 d . U . . .
 Fe2 Fe 0.40684(2) 0.33208(2) 0.35490(2) 0.01380(4) Uani 1 1 d . U . . .
 C11 C 0.42389(4) 0.27345(10) 0.30474(6) 0.0153(2) Uani 1 1 d . U . . .
 C12 C 0.44416(4) 0.16855(11) 0.26447(7) 0.0216(3) Uani 1 1 d . U . . .
 H12 H 0.450009 0.111744 0.254594 0.026 Uiso 1 1 calc R . . . .
 C13 C 0.44843(5) 0.25018(11) 0.24732(7) 0.0225(3) Uani 1 1 d . U . . .
 H13 H 0.457978 0.262451 0.222953 0.027 Uiso 1 1 calc R . . . .
 N2 N 0.42950(3) 0.18321(8) 0.29955(5) 0.0163(2) Uani 1 1 d . U . . .
 C21 C 0.42008(4) 0.10644(10) 0.32249(6) 0.0183(3) Uani 1 1 d . U . . .
 C22 C 0.44829(4) 0.05888(11) 0.36541(7) 0.0216(3) Uani 1 1 d . U . . .
 C23 C 0.43934(5) -0.02310(11) 0.38101(7) 0.0268(3) Uani 1 1 d . U . . .
 H23 H 0.457833 -0.057599 0.409631 0.032 Uiso 1 1 calc R . . . .
 C24 C 0.40391(5) -0.05505(11) 0.35542(8) 0.0289(4) Uani 1 1 d . U . . .
 H24 H 0.398390 -0.111094 0.366598 0.035 Uiso 1 1 calc R . . . .
 C25 C 0.37643(5) -0.00562(12) 0.31354(8) 0.0281(3) Uani 1 1 d . U . . .
 H25 H 0.352205 -0.027795 0.296846 0.034 Uiso 1 1 calc R . . . .
 C26 C 0.38389(4) 0.07640(11) 0.29553(7) 0.0215(3) Uani 1 1 d . U . . .
 C221 C 0.48750(5) 0.09236(12) 0.39267(7) 0.0273(3) Uani 1 1 d . U . . .
 H221 H 0.487335 0.157545 0.382822 0.033 Uiso 1 1 calc R . . . .
 C222 C 0.50595(5) 0.08502(12) 0.45546(8) 0.0292(4) Uani 1 1 d . U . . .
 H22A H 0.491380 0.117179 0.469168 0.044 Uiso 1 1 calc GR . . . .
 H22B H 0.530239 0.112048 0.471273 0.044 Uiso 1 1 calc GR . . . .
 H22C H 0.508025 0.021151 0.466103 0.044 Uiso 1 1 calc GR . . . .
 C223 C 0.51014(6) 0.0397(2) 0.37179(10) 0.0493(6) Uani 1 1 d . U . . .
 H22D H 0.510384 -0.024620 0.380587 0.074 Uiso 1 1 calc GR . . . .
 H22E H 0.535081 0.063006 0.389561 0.074 Uiso 1 1 calc GR . . . .
 H22F H 0.499428 0.047129 0.331882 0.074 Uiso 1 1 calc GR . . . .
 C261 C 0.35478(4) 0.12635(12) 0.24607(7) 0.0257(3) Uani 1 1 d . U . . .
 H261 H 0.362342 0.191230 0.249297 0.031 Uiso 1 1 calc R . . . .
 C262 C 0.31720(5) 0.12387(13) 0.24237(7) 0.0288(4) Uani 1 1 d . U . . .
 H26A H 0.308471 0.061242 0.237238 0.043 Uiso 1 1 calc GR . . . .
 H26B H 0.300316 0.160665 0.211138 0.043 Uiso 1 1 calc GR . . . .
 H26C H 0.318691 0.148105 0.276370 0.043 Uiso 1 1 calc GR . . . .
 C263 C 0.35281(5) 0.08899(19) 0.19294(8) 0.0454(6) Uani 1 1 d . U . . .
 H26D H 0.376629 0.094987 0.194554 0.068 Uiso 1 1 calc GR . . . .
 H26E H 0.334690 0.123137 0.161422 0.068 Uiso 1 1 calc GR . . . .
 H26F H 0.345842 0.025000 0.188924 0.068 Uiso 1 1 calc GR . . . .
 N3 N 0.43623(3) 0.31352(9) 0.27194(5) 0.0172(2) Uani 1 1 d . U . . .
 C31 C 0.43228(4) 0.40631(10) 0.25317(6) 0.0170(3) Uani 1 1 d . U . . .
 C32 C 0.45948(4) 0.46949(10) 0.28393(6) 0.0178(3) Uani 1 1 d . U . . .
 C33 C 0.45711(4) 0.55377(11) 0.25957(7) 0.0207(3) Uani 1 1 d . U . . .
 H33 H 0.474817 0.598758 0.279164 0.025 Uiso 1 1 calc R . . . .
 C34 C 0.42928(5) 0.57294(11) 0.20715(7) 0.0242(3) Uani 1 1 d . U . . .
 H34 H 0.428584 0.630119 0.190972 0.029 Uiso 1 1 calc R . . . .
 C35 C 0.40260(5) 0.50951(12) 0.17834(7) 0.0248(3) Uani 1 1 d . U . . .
 H35 H 0.383514 0.523962 0.142802 0.030 Uiso 1 1 calc R . . . .
 C36 C 0.40341(4) 0.42459(11) 0.20089(6) 0.0212(3) Uani 1 1 d . U . . .
 C321 C 0.49119(4) 0.44555(11) 0.33969(6) 0.0188(3) Uani 1 1 d . U . . .
 H321 H 0.481727 0.405302 0.359096 0.023 Uiso 1 1 calc R . . . .
 C322 C 0.51998(4) 0.39211(13) 0.33196(7) 0.0260(3) Uani 1 1 d . U . . .
 H32A H 0.509512 0.334754 0.313349 0.039 Uiso 1 1 calc GR . . . .
 H32B H 0.540884 0.379844 0.367943 0.039 Uiso 1 1 calc GR . . . .
 H32C H 0.527881 0.427688 0.309644 0.039 Uiso 1 1 calc GR . . . .
 C323 C 0.50854(5) 0.52796(12) 0.37614(7) 0.0259(3) Uani 1 1 d . U . . .
 H32D H 0.519836 0.566159 0.359493 0.039 Uiso 1 1 calc GR . . . .
 H32E H 0.527096 0.507948 0.412548 0.039 Uiso 1 1 calc GR . . . .
 H32F H 0.489838 0.562694 0.379777 0.039 Uiso 1 1 calc GR . . . .
 C361 C 0.37396(5) 0.35497(13) 0.16888(7) 0.0284(3) Uani 1 1 d . U . . .
 H361 H 0.378159 0.301244 0.193176 0.034 Uiso 0.771(9) 1 calc R . P A 1
 H36A H 0.384025 0.293458 0.183072 0.034 Uiso 0.229(9) 1 calc R . P A 2
 C362 C 0.37693(10) 0.3231(2) 0.11703(12) 0.0361(7) Uani 0.771(9) 1 d . U P A 1
 H36B H 0.375338 0.375706 0.094431 0.054 Uiso 0.771(9) 1 calc GR . P A 1
 H36C H 0.357054 0.281078 0.095457 0.054 Uiso 0.771(9) 1 calc GR . P A 1
 H36D H 0.400270 0.292482 0.128831 0.054 Uiso 0.771(9) 1 calc GR . P A 1
 C363 C 0.33656(7) 0.3910(2) 0.1524(2) 0.0410(10) Uani 0.771(9) 1 d . U P A 1
 H36E H 0.335257 0.411009 0.185154 0.062 Uiso 0.771(9) 1 calc GR . P A 1
 H36F H 0.318572 0.343213 0.133862 0.062 Uiso 0.771(9) 1 calc GR . P A 1
 H36G H 0.331478 0.442285 0.127264 0.062 Uiso 0.771(9) 1 calc GR . P A 1
 C62C C 0.3589(5) 0.3541(11) 0.1106(4) 0.055(4) Uani 0.229(9) 1 d . U P A 2
 H62A H 0.345110 0.409882 0.095262 0.082 Uiso 0.229(9) 1 calc GR . P A 2
 H62B H 0.342740 0.301788 0.095469 0.082 Uiso 0.229(9) 1 calc GR . P A 2
 H62C H 0.378575 0.349922 0.100897 0.082 Uiso 0.229(9) 1 calc GR . P A 2
 C63C C 0.3398(2) 0.3743(7) 0.1827(6) 0.034(3) Uani 0.229(9) 1 d . U P A 2
 H63A H 0.348723 0.369716 0.222392 0.051 Uiso 0.229(9) 1 calc GR . P A 2
 H63B H 0.320594 0.329449 0.163626 0.051 Uiso 0.229(9) 1 calc GR . P A 2
 H63C H 0.330057 0.435167 0.170121 0.051 Uiso 0.229(9) 1 calc GR . P A 2
 Fe3 Fe 0.37143(2) 0.46555(2) 0.37887(2) 0.01398(4) Uani 1 1 d . U . . .
 C14 C 0.33904(4) 0.57588(10) 0.35530(6) 0.0155(3) Uani 1 1 d . U . . .
 C15 C 0.32051(4) 0.72349(11) 0.33362(7) 0.0224(3) Uani 1 1 d . U . . .
 H15 H 0.321318 0.786600 0.327704 0.027 Uiso 1 1 calc R . . . .
 C16 C 0.29132(4) 0.67558(11) 0.32701(7) 0.0239(3) Uani 1 1 d . U . . .
 H16 H 0.267561 0.698327 0.315632 0.029 Uiso 1 1 calc R . . . .
 N4 N 0.34917(3) 0.66287(9) 0.35074(5) 0.0173(2) Uani 1 1 d . U . . .
 N5 N 0.30273(3) 0.58631(9) 0.34009(5) 0.0188(2) Uani 1 1 d . U . . .
 C41 C 0.38485(4) 0.68997(10) 0.35988(7) 0.0189(3) Uani 1 1 d . U . . .
 C42 C 0.38911(5) 0.70419(11) 0.31306(8) 0.0261(3) Uani 1 1 d . U . . .
 C43 C 0.42373(5) 0.72584(12) 0.32180(10) 0.0344(4) Uani 1 1 d . U . . .
 H43 H 0.427802 0.735445 0.291194 0.041 Uiso 1 1 calc R . . . .
 C44 C 0.45223(5) 0.73359(13) 0.37421(10) 0.0392(5) Uani 1 1 d . U . . .
 H44 H 0.475888 0.746161 0.379224 0.047 Uiso 1 1 calc R . . . .
 C45 C 0.44706(5) 0.72337(12) 0.41995(9) 0.0347(4) Uani 1 1 d . U . . .
 H45 H 0.467029 0.730526 0.455742 0.042 Uiso 1 1 calc R . . . .
 C46 C 0.41256(4) 0.70255(11) 0.41366(7) 0.0242(3) Uani 1 1 d . U . . .
 C421 C 0.35676(5) 0.69646(14) 0.25454(8) 0.0325(4) Uani 1 1 d . U . . .
 H421 H 0.334929 0.720383 0.256157 0.039 Uiso 1 1 calc R . . . .
 C422 C 0.34890(5) 0.59869(14) 0.23669(8) 0.0326(4) Uani 1 1 d . U . . .
 H42A H 0.370188 0.571797 0.236286 0.049 Uiso 1 1 calc GR . . . .
 H42B H 0.328013 0.595558 0.199739 0.049 Uiso 1 1 calc GR . . . .
 H42C H 0.343391 0.565313 0.262460 0.049 Uiso 1 1 calc GR . . . .
 C423 C 0.36122(7) 0.75284(16) 0.21205(10) 0.0449(5) Uani 1 1 d . U . . .
 H42D H 0.366405 0.815766 0.224600 0.067 Uiso 1 1 calc GR . . . .
 H42E H 0.338757 0.750339 0.176901 0.067 Uiso 1 1 calc GR . . . .
 H42F H 0.381372 0.728697 0.207290 0.067 Uiso 1 1 calc GR . . . .
 C461 C 0.40505(5) 0.69779(12) 0.46195(7) 0.0305(4) Uani 1 1 d . U . . .
 H461 H 0.387067 0.648099 0.454529 0.037 Uiso 1 1 calc R . . . .
 C462 C 0.38789(6) 0.78637(14) 0.46747(8) 0.0381(4) Uani 1 1 d . U . . .
 H46A H 0.404165 0.837041 0.471838 0.057 Uiso 1 1 calc GR . . . .
 H46B H 0.384017 0.782912 0.499698 0.057 Uiso 1 1 calc GR . . . .
 H46C H 0.364526 0.795718 0.434405 0.057 Uiso 1 1 calc GR . . . .
 C463 C 0.43902(7) 0.67635(14) 0.51648(8) 0.0454(6) Uani 1 1 d . U . . .
 H46D H 0.450859 0.622077 0.512077 0.068 Uiso 1 1 calc GR . . . .
 H46E H 0.431975 0.665740 0.545111 0.068 Uiso 1 1 calc GR . . . .
 H46F H 0.455913 0.727540 0.527058 0.068 Uiso 1 1 calc GR . . . .
 C51 C 0.27817(4) 0.51760(11) 0.34010(7) 0.0203(3) Uani 1 1 d . U . . .
 C52 C 0.26400(4) 0.45401(11) 0.29723(7) 0.0215(3) Uani 1 1 d . U . . .
 C53 C 0.23901(4) 0.39168(12) 0.29754(7) 0.0273(3) Uani 1 1 d . U . . .
 H53 H 0.229415 0.346293 0.269923 0.033 Uiso 1 1 calc R . . . .
 C54 C 0.22799(4) 0.39498(13) 0.33743(8) 0.0310(4) Uani 1 1 d . U . . .
 H54 H 0.210916 0.351987 0.336830 0.037 Uiso 1 1 calc R . . . .
 C55 C 0.24157(4) 0.46010(13) 0.37809(8) 0.0291(4) Uani 1 1 d . U . . .
 H55 H 0.233337 0.462122 0.404708 0.035 Uiso 1 1 calc R . . . .
 C56 C 0.26726(4) 0.52314(12) 0.38065(7) 0.0244(3) Uani 1 1 d . U . . .
 C521 C 0.27375(4) 0.45705(11) 0.25092(7) 0.0228(3) Uani 1 1 d . U . . .
 H521 H 0.300210 0.471685 0.267371 0.027 Uiso 1 1 calc R . . . .
 C522 C 0.26723(5) 0.36745(13) 0.21986(8) 0.0304(4) Uani 1 1 d . U . . .
 H52A H 0.278951 0.318172 0.246168 0.046 Uiso 1 1 calc GR . . . .
 H52B H 0.277523 0.370901 0.194631 0.046 Uiso 1 1 calc GR . . . .
 H52C H 0.241057 0.355893 0.198902 0.046 Uiso 1 1 calc GR . . . .
 C523 C 0.25257(5) 0.53235(13) 0.21016(8) 0.0316(4) Uani 1 1 d . U . . .
 H52D H 0.226451 0.520283 0.193962 0.047 Uiso 1 1 calc GR . . . .
 H52E H 0.259556 0.534365 0.181005 0.047 Uiso 1 1 calc GR . . . .
 H52F H 0.258138 0.590593 0.229407 0.047 Uiso 1 1 calc GR . . . .
 C561 C 0.28241(5) 0.59361(13) 0.42639(8) 0.0299(4) Uani 1 1 d . U . . .
 H561 H 0.298247 0.635317 0.418614 0.036 Uiso 0.656(17) 1 calc R . P B 1
 H56A H 0.286834 0.649535 0.410071 0.036 Uiso 0.344(17) 1 calc R . P B 2
 C804 C 0.24719(16) 0.1676(4) 0.4803(2) 0.0607(14) Uani 0.5 1 d D U P C -1
 H80A H 0.271859 0.154840 0.485449 0.073 Uiso 0.5 1 calc R . P C -1
 H80B H 0.243702 0.130481 0.507220 0.073 Uiso 0.5 1 calc R . P C -1
 C801 C 0.2719(5) 0.3937(7) 0.5631(5) 0.145(7) Uani 0.5 1 d D U P C -1
 H80C H 0.269560 0.432624 0.532897 0.218 Uiso 0.5 1 calc GR . P C -1
 H80D H 0.293650 0.410765 0.596964 0.218 Uiso 0.5 1 calc GR . P C -1
 H80E H 0.250373 0.400930 0.568190 0.218 Uiso 0.5 1 calc GR . P C -1
 C705 C 0.45266(16) 0.9001(5) 0.2407(4) 0.083(3) Uani 0.5 1 d D U P D -1
 H70A H 0.464686 0.958927 0.252825 0.124 Uiso 0.5 1 calc GR . P D -1
 H70B H 0.435139 0.892011 0.254488 0.124 Uiso 0.5 1 calc GR . P D -1
 H70C H 0.439922 0.897668 0.200492 0.124 Uiso 0.5 1 calc GR . P D -1
 C704 C 0.4801(2) 0.8273(5) 0.2625(5) 0.110(4) Uani 0.5 1 d D U P D -1
 H70D H 0.467019 0.768891 0.250989 0.132 Uiso 0.5 1 calc R . P D -1
 H70E H 0.491588 0.829686 0.303106 0.132 Uiso 0.5 1 calc R . P D -1
 C703 C 0.51001(19) 0.8250(5) 0.2474(4) 0.080(2) Uani 0.5 1 d D U P D -1
 H70F H 0.499739 0.829235 0.206994 0.095 Uiso 0.5 1 calc R . P D -1
 H70G H 0.523649 0.767485 0.259832 0.095 Uiso 0.5 1 calc R . P D -1
 C702 C 0.53607(18) 0.9072(4) 0.2758(2) 0.0575(13) Uani 0.5 1 d D U P D -1
 H70H H 0.522053 0.963968 0.262015 0.069 Uiso 0.5 1 calc R . P D -1
 H70I H 0.544572 0.904126 0.315856 0.069 Uiso 0.5 1 calc R . P D -1
 C701 C 0.5676(2) 0.9111(5) 0.2669(3) 0.0752(19) Uani 0.5 1 d D U P D -1
 H70J H 0.581376 0.854489 0.279363 0.113 Uiso 0.5 1 calc GR . P D -1
 H70K H 0.583167 0.961928 0.287598 0.113 Uiso 0.5 1 calc GR . P D -1
 H70L H 0.559623 0.919517 0.227608 0.113 Uiso 0.5 1 calc GR . P D -1
 C805 C 0.2198(3) 0.1388(7) 0.4233(4) 0.082(3) Uani 0.5 1 d D U P C -1
 H80F H 0.195221 0.151220 0.417620 0.122 Uiso 0.5 1 calc GR . P C -1
 H80G H 0.222366 0.073822 0.418862 0.122 Uiso 0.5 1 calc GR . P C -1
 H80H H 0.223881 0.172542 0.396226 0.122 Uiso 0.5 1 calc GR . P C -1
 C562 C 0.25324(14) 0.6503(5) 0.4287(3) 0.0474(15) Uani 0.656(17) 1 d . U P B 1
 H56B H 0.239506 0.682384 0.393765 0.071 Uiso 0.656(17) 1 calc GR . P B 1
 H56C H 0.264466 0.694399 0.458668 0.071 Uiso 0.656(17) 1 calc GR . P B 1
 H56D H 0.236774 0.611139 0.435234 0.071 Uiso 0.656(17) 1 calc GR . P B 1
 C563 C 0.3069(2) 0.5473(4) 0.4830(2) 0.0554(18) Uani 0.656(17) 1 d . U P B 1
 H56E H 0.292313 0.504716 0.491446 0.083 Uiso 0.656(17) 1 calc GR . P B 1
 H56F H 0.317085 0.593617 0.511803 0.083 Uiso 0.656(17) 1 calc GR . P B 1
 H56G H 0.326747 0.514687 0.481269 0.083 Uiso 0.656(17) 1 calc GR . P B 1
 C62E C 0.2549(3) 0.6200(10) 0.4465(6) 0.050(3) Uani 0.344(17) 1 d . U P B 2
 H62D H 0.231584 0.635561 0.414882 0.075 Uiso 0.344(17) 1 calc GR . P B 2
 H62E H 0.264216 0.672207 0.471217 0.075 Uiso 0.344(17) 1 calc GR . P B 2
 H62F H 0.251607 0.568832 0.466268 0.075 Uiso 0.344(17) 1 calc GR . P B 2
 C63E C 0.3173(3) 0.5668(10) 0.4710(4) 0.046(3) Uani 0.344(17) 1 d . U P B 2
 H63D H 0.314198 0.513201 0.489227 0.068 Uiso 0.344(17) 1 calc GR . P B 2
 H63E H 0.327367 0.616408 0.497531 0.068 Uiso 0.344(17) 1 calc GR . P B 2
 H63F H 0.333943 0.552547 0.456349 0.068 Uiso 0.344(17) 1 calc GR . P B 2
 S1 S 0.44610(2) 0.27871(3) 0.43989(2) 0.01638(7) Uani 1 1 d . U . . .
 S2 S 0.39919(2) 0.45882(2) 0.47165(2) 0.01607(7) Uani 1 1 d . U . . .
 S3 S 0.35036(2) 0.32626(2) 0.34594(2) 0.01591(7) Uani 1 1 d . U . . .
 S4 S 0.41629(2) 0.48125(2) 0.35830(2) 0.01551(7) Uani 1 1 d . U . . .
 C901 C 0.3611(5) 0.1049(11) 0.5951(6) 0.223(9) Uani 0.601(9) 1 d D U P E 4
 H90A H 0.347602 0.155126 0.570803 0.334 Uiso 0.601(9) 1 calc GR . P E 4
 H90B H 0.386461 0.122816 0.618180 0.334 Uiso 0.601(9) 1 calc GR . P E 4
 H90C H 0.350177 0.089527 0.618573 0.334 Uiso 0.601(9) 1 calc GR . P E 4
 C902 C 0.3597(4) 0.0344(10) 0.5655(5) 0.150(5) Uani 0.601(9) 1 d D U P E 4
 H90D H 0.370147 -0.015483 0.592494 0.180 Uiso 0.601(9) 1 calc R . P E 4
 H90E H 0.377860 0.047451 0.553125 0.180 Uiso 0.601(9) 1 calc R . P E 4
 C903 C 0.3316(4) -0.0041(7) 0.5213(3) 0.164(5) Uani 0.601(9) 1 d D U P E 4
 H90F H 0.311873 0.037563 0.517132 0.197 Uiso 0.601(9) 1 calc R . P E 4
 H90G H 0.337592 0.015341 0.492375 0.197 Uiso 0.601(9) 1 calc R . P E 4
 C904 C 0.3134(4) -0.0708(9) 0.4990(6) 0.190(6) Uani 0.601(9) 1 d D U P E 4
 H90H H 0.302621 -0.083187 0.523309 0.228 Uiso 0.601(9) 1 calc R . P E 4
 H90I H 0.332818 -0.116775 0.509544 0.228 Uiso 0.601(9) 1 calc R . P E 4
 C905 C 0.2876(4) -0.1067(13) 0.4511(7) 0.156(6) Uani 0.601(9) 1 d D U P E 4
 H90J H 0.276293 -0.058469 0.423876 0.234 Uiso 0.601(9) 1 calc GR . P E 4
 H90K H 0.268966 -0.136579 0.457491 0.234 Uiso 0.601(9) 1 calc GR . P E 4
 H90L H 0.298725 -0.151137 0.437418 0.234 Uiso 0.601(9) 1 calc GR . P E 4
 C91A C 0.3571(2) 0.1033(6) 0.5901(4) 0.057(2) Uani 0.399(9) 1 d D U P E 5
 H91A H 0.347228 0.138456 0.555970 0.086 Uiso 0.399(9) 1 calc GR . P E 5
 H91B H 0.375007 0.139916 0.620467 0.086 Uiso 0.399(9) 1 calc GR . P E 5
 H91C H 0.337398 0.086155 0.597857 0.086 Uiso 0.399(9) 1 calc GR . P E 5
 C92A C 0.3757(3) 0.0169(7) 0.5837(4) 0.073(3) Uani 0.399(9) 1 d D U P E 5
 H92A H 0.392787 -0.006772 0.620627 0.088 Uiso 0.399(9) 1 calc R . P E 5
 H92B H 0.389985 0.032551 0.564802 0.088 Uiso 0.399(9) 1 calc R . P E 5
 C93A C 0.3473(3) -0.0590(7) 0.5501(3) 0.094(3) Uani 0.399(9) 1 d D U P E 5
 H93A H 0.360034 -0.118008 0.559691 0.113 Uiso 0.399(9) 1 calc R . P E 5
 H93B H 0.328706 -0.060689 0.562589 0.113 Uiso 0.399(9) 1 calc R . P E 5
 C94A C 0.3283(3) -0.0509(9) 0.4898(3) 0.081(3) Uani 0.399(9) 1 d D U P E 5
 H94A H 0.346996 -0.058120 0.477779 0.097 Uiso 0.399(9) 1 calc R . P E 5
 H94B H 0.319572 0.012379 0.481329 0.097 Uiso 0.399(9) 1 calc R . P E 5
 C95A C 0.2966(4) -0.1106(13) 0.4526(8) 0.093(5) Uani 0.399(9) 1 d D U P E 5
 H95A H 0.298638 -0.126022 0.419667 0.139 Uiso 0.399(9) 1 calc GR . P E 5
 H95B H 0.273793 -0.078188 0.441831 0.139 Uiso 0.399(9) 1 calc GR . P E 5
 H95C H 0.297010 -0.166127 0.472206 0.139 Uiso 0.399(9) 1 calc GR . P E 5
 C802 C 0.27499(18) 0.2949(5) 0.5493(2) 0.0707(17) Uani 0.5 1 d D U P C -1
 H80I H 0.298896 0.285639 0.550830 0.085 Uiso 0.5 1 calc R . P C -1
 H80J H 0.273940 0.255409 0.577408 0.085 Uiso 0.5 1 calc R . P C -1
 C803 C 0.24500(18) 0.2669(4) 0.4925(2) 0.0538(15) Uani 0.5 1 d D U P C -1
 H80K H 0.221054 0.279019 0.490321 0.065 Uiso 0.5 1 calc R . P C -1
 H80L H 0.246812 0.304316 0.464229 0.065 Uiso 0.5 1 calc R . P C -1

loop_
  _atom_site_aniso_label
  _atom_site_aniso_U_11
  _atom_site_aniso_U_22
  _atom_site_aniso_U_33
  _atom_site_aniso_U_23
  _atom_site_aniso_U_13
  _atom_site_aniso_U_12
 Mo1 0.01202(5) 0.01228(6) 0.01333(5) 0.00056(4) 0.00502(4) -0.00027(4)
 C1 0.0211(7) 0.0195(7) 0.0180(6) 0.0042(6) 0.0068(5) -0.0024(6)
 C2 0.0281(7) 0.0168(7) 0.0202(7) 0.0023(6) 0.0138(6) 0.0000(6)
 C3 0.0178(6) 0.0269(8) 0.0225(7) 0.0067(6) 0.0108(6) 0.0003(6)
 C4 0.0242(7) 0.0205(7) 0.0179(6) -0.0005(5) 0.0094(6) -0.0098(6)
 C5 0.0251(7) 0.0145(7) 0.0241(7) 0.0032(6) 0.0134(6) -0.0004(5)
 C6 0.0277(8) 0.0392(11) 0.0266(8) 0.0107(8) 0.0009(7) -0.0045(8)
 C7 0.0534(11) 0.0262(9) 0.0253(8) -0.0021(7) 0.0258(8) 0.0000(8)
 C8 0.0218(8) 0.0484(12) 0.0407(10) 0.0165(9) 0.0176(8) 0.0075(8)
 C9 0.0438(10) 0.0346(10) 0.0237(8) -0.0054(7) 0.0130(8) -0.0234(8)
 C10 0.0469(11) 0.0195(8) 0.0522(12) 0.0066(8) 0.0344(10) 0.0065(7)
 Fe1 0.01150(8) 0.01465(10) 0.01613(9) -0.00040(7) 0.00457(7) -0.00164(7)
 N1 0.0161(5) 0.0195(6) 0.0193(6) -0.0002(5) 0.0074(5) -0.0007(5)
 Fe2 0.01439(9) 0.01213(9) 0.01485(9) 0.00030(7) 0.00694(7) 0.00027(7)
 C11 0.0145(6) 0.0139(6) 0.0154(6) 0.0008(5) 0.0055(5) -0.0008(5)
 C12 0.0273(7) 0.0177(7) 0.0252(7) -0.0005(6) 0.0169(6) 0.0017(6)
 C13 0.0292(8) 0.0197(7) 0.0258(7) 0.0001(6) 0.0189(6) 0.0014(6)
 N2 0.0181(5) 0.0140(6) 0.0186(6) 0.0005(4) 0.0103(5) 0.0005(4)
 C21 0.0242(7) 0.0115(6) 0.0221(7) -0.0010(5) 0.0134(6) -0.0006(5)
 C22 0.0266(7) 0.0161(7) 0.0262(7) 0.0020(6) 0.0159(6) 0.0039(6)
 C23 0.0391(9) 0.0152(7) 0.0318(8) 0.0054(6) 0.0215(7) 0.0063(6)
 C24 0.0465(10) 0.0130(7) 0.0365(9) -0.0010(6) 0.0273(8) -0.0035(7)
 C25 0.0363(9) 0.0190(8) 0.0337(9) -0.0066(7) 0.0206(8) -0.0103(7)
 C26 0.0252(7) 0.0180(7) 0.0239(7) -0.0044(6) 0.0140(6) -0.0046(6)
 C221 0.0231(7) 0.0275(9) 0.0319(8) 0.0106(7) 0.0136(7) 0.0063(6)
 C222 0.0265(8) 0.0248(8) 0.0331(9) 0.0062(7) 0.0117(7) 0.0055(7)
 C223 0.0354(11) 0.0762(18) 0.0419(12) 0.0136(11) 0.0228(9) 0.0226(11)
 C261 0.0229(7) 0.0278(8) 0.0228(7) -0.0034(6) 0.0080(6) -0.0081(6)
 C262 0.0255(8) 0.0312(9) 0.0290(8) -0.0057(7) 0.0124(7) -0.0051(7)
 C263 0.0286(9) 0.0815(18) 0.0261(9) -0.0080(10) 0.0130(8) -0.0044(10)
 N3 0.0208(6) 0.0141(6) 0.0187(6) 0.0010(5) 0.0109(5) 0.0004(4)
 C31 0.0205(6) 0.0148(6) 0.0186(6) 0.0021(5) 0.0115(5) 0.0008(5)
 C32 0.0205(6) 0.0175(7) 0.0191(6) 0.0009(5) 0.0124(5) 0.0003(5)
 C33 0.0247(7) 0.0167(7) 0.0239(7) 0.0014(6) 0.0141(6) -0.0014(6)
 C34 0.0287(8) 0.0184(7) 0.0289(8) 0.0080(6) 0.0163(7) 0.0033(6)
 C35 0.0245(7) 0.0250(8) 0.0229(7) 0.0075(6) 0.0096(6) 0.0037(6)
 C36 0.0214(7) 0.0218(7) 0.0207(7) 0.0020(6) 0.0103(6) 0.0002(6)
 C321 0.0193(6) 0.0213(7) 0.0182(6) 0.0005(5) 0.0110(5) 0.0000(5)
 C322 0.0235(7) 0.0336(9) 0.0233(7) 0.0024(7) 0.0131(6) 0.0058(7)
 C323 0.0245(8) 0.0278(9) 0.0237(7) -0.0043(6) 0.0102(6) -0.0050(6)
 C361 0.0246(8) 0.0262(9) 0.0268(8) 0.0003(7) 0.0061(6) -0.0044(6)
 C362 0.0352(16) 0.0403(17) 0.0253(12) -0.0056(11) 0.0084(11) -0.0062(13)
 C363 0.0225(11) 0.0410(17) 0.053(2) -0.0065(15) 0.0126(13) -0.0062(11)
 C62C 0.068(10) 0.062(9) 0.027(4) -0.014(5) 0.016(5) -0.032(7)
 C63C 0.028(4) 0.031(5) 0.042(6) -0.003(4) 0.017(4) -0.004(3)
 Fe3 0.01196(9) 0.01314(9) 0.01596(9) 0.00140(7) 0.00593(7) 0.00102(7)
 C14 0.0141(6) 0.0147(6) 0.0157(6) 0.0006(5) 0.0054(5) -0.0001(5)
 C15 0.0191(7) 0.0146(7) 0.0290(8) 0.0038(6) 0.0078(6) 0.0039(5)
 C16 0.0159(6) 0.0175(7) 0.0332(8) 0.0048(6) 0.0074(6) 0.0043(5)
 N4 0.0141(5) 0.0145(6) 0.0206(6) 0.0013(5) 0.0058(5) 0.0003(4)
 N5 0.0134(5) 0.0147(6) 0.0246(6) 0.0025(5) 0.0062(5) 0.0012(4)
 C41 0.0159(6) 0.0115(6) 0.0283(7) -0.0002(5) 0.0097(6) -0.0003(5)
 C42 0.0292(8) 0.0163(7) 0.0378(9) -0.0005(6) 0.0200(7) -0.0022(6)
 C43 0.0347(9) 0.0208(8) 0.0598(12) -0.0013(8) 0.0323(9) -0.0018(7)
 C44 0.0257(8) 0.0220(9) 0.0761(15) -0.0018(9) 0.0293(10) -0.0016(7)
 C45 0.0183(7) 0.0182(8) 0.0526(11) -0.0062(8) 0.0046(7) -0.0019(6)
 C46 0.0183(7) 0.0124(7) 0.0323(8) -0.0012(6) 0.0042(6) -0.0004(5)
 C421 0.0339(9) 0.0355(10) 0.0298(9) 0.0049(7) 0.0164(7) 0.0035(8)
 C422 0.0323(9) 0.0352(10) 0.0264(8) 0.0020(7) 0.0108(7) -0.0033(8)
 C423 0.0501(12) 0.0424(12) 0.0462(12) 0.0162(10) 0.0260(10) 0.0130(10)
 C461 0.0368(9) 0.0190(8) 0.0235(8) -0.0024(6) 0.0044(7) -0.0027(7)
 C462 0.0463(11) 0.0330(10) 0.0309(9) -0.0051(8) 0.0149(8) 0.0034(9)
 C463 0.0537(13) 0.0267(10) 0.0283(9) -0.0019(8) -0.0030(9) -0.0007(9)
 C51 0.0121(6) 0.0168(7) 0.0281(7) 0.0048(6) 0.0063(5) 0.0011(5)
 C52 0.0123(6) 0.0189(7) 0.0260(7) 0.0054(6) 0.0032(5) 0.0011(5)
 C53 0.0186(7) 0.0214(8) 0.0322(8) 0.0045(7) 0.0041(6) -0.0034(6)
 C54 0.0176(7) 0.0294(9) 0.0408(10) 0.0113(8) 0.0095(7) -0.0032(6)
 C55 0.0197(7) 0.0329(9) 0.0355(9) 0.0112(7) 0.0137(7) 0.0035(6)
 C56 0.0175(7) 0.0241(8) 0.0291(8) 0.0063(6) 0.0090(6) 0.0043(6)
 C521 0.0169(6) 0.0199(7) 0.0250(7) 0.0009(6) 0.0045(6) -0.0013(5)
 C522 0.0250(8) 0.0267(9) 0.0289(8) -0.0055(7) 0.0042(7) -0.0032(7)
 C523 0.0297(9) 0.0292(9) 0.0299(9) 0.0070(7) 0.0093(7) 0.0025(7)
 C561 0.0267(8) 0.0307(9) 0.0340(9) -0.0004(7) 0.0157(7) 0.0029(7)
 C804 0.053(3) 0.086(4) 0.040(3) 0.012(3) 0.020(2) -0.013(3)
 C801 0.252(19) 0.101(8) 0.080(8) -0.006(7) 0.076(10) -0.038(10)
 C705 0.045(3) 0.058(4) 0.168(9) 0.014(4) 0.069(5) 0.000(3)
 C704 0.108(6) 0.049(4) 0.241(11) 0.066(5) 0.140(7) 0.027(3)
 C703 0.090(6) 0.085(5) 0.091(5) -0.006(4) 0.065(5) 0.026(4)
 C702 0.075(4) 0.059(3) 0.045(3) 0.010(2) 0.035(3) 0.008(3)
 C701 0.095(5) 0.068(4) 0.085(5) 0.014(4) 0.061(5) 0.016(4)
 C805 0.083(5) 0.103(8) 0.060(4) -0.009(5) 0.036(4) -0.038(5)
 C562 0.0384(19) 0.055(3) 0.049(3) -0.017(2) 0.022(2) 0.004(2)
 C563 0.063(4) 0.043(2) 0.032(2) 0.0000(17) 0.000(2) -0.004(2)
 C62E 0.048(4) 0.063(7) 0.053(6) 0.002(4) 0.035(4) 0.014(4)
 C63E 0.041(4) 0.050(6) 0.034(4) -0.009(4) 0.008(3) 0.012(4)
 S1 0.01386(14) 0.01580(16) 0.01839(15) 0.00200(13) 0.00678(12) 0.00240(12)
 S2 0.01652(15) 0.01438(16) 0.01612(15) -0.00151(12) 0.00681(12) -0.00088(12)
 S3 0.01344(14) 0.01670(16) 0.01471(14) 0.00044(12) 0.00434(12) -0.00217(12)
 S4 0.01524(14) 0.01319(15) 0.01887(15) 0.00117(12) 0.00873(12) -0.00037(12)
 C901 0.34(2) 0.177(13) 0.125(11) -0.037(9) 0.094(12) -0.124(14)
 C902 0.213(12) 0.177(11) 0.085(7) -0.009(6) 0.090(7) -0.077(9)
 C903 0.262(11) 0.114(7) 0.060(4) 0.018(4) 0.030(6) -0.055(7)
 C904 0.171(11) 0.165(10) 0.194(11) 0.024(8) 0.054(9) -0.053(8)
 C905 0.181(15) 0.143(12) 0.139(10) -0.007(9) 0.072(9) 0.005(11)
 C91A 0.053(4) 0.064(5) 0.041(4) 0.028(4) 0.012(3) -0.011(3)
 C92A 0.088(6) 0.099(6) 0.051(5) 0.006(5) 0.047(5) -0.004(5)
 C93A 0.145(8) 0.077(6) 0.080(5) 0.009(5) 0.070(5) -0.015(6)
 C94A 0.097(6) 0.103(8) 0.071(5) 0.002(5) 0.064(5) -0.006(5)
 C95A 0.066(6) 0.074(8) 0.163(12) -0.037(9) 0.074(7) -0.019(5)
 C802 0.065(4) 0.102(5) 0.037(3) 0.016(3) 0.019(3) -0.018(4)
 C803 0.045(4) 0.085(5) 0.039(3) 0.020(3) 0.026(3) 0.003(3)

_geom_special_details
;
 All esds (except the esd in the dihedral angle between two l.s. planes)
 are estimated using the full covariance matrix.  The cell esds are taken
 into account individually in the estimation of esds in distances, angles
 and torsion angles; correlations between esds in cell parameters are only
 used when they are defined by crystal symmetry.  An approximate (isotropic)
 treatment of cell esds is used for estimating esds involving l.s. planes.
;
loop_
  _geom_bond_atom_site_label_1
  _geom_bond_atom_site_label_2
  _geom_bond_distance
  _geom_bond_site_symmetry_2
  _geom_bond_publ_flag
 Mo1 C1 2.3764(15) . ?
 Mo1 C2 2.4040(15) . ?
 Mo1 C3 2.3728(15) . ?
 Mo1 C4 2.3915(15) . ?
 Mo1 C5 2.3947(15) . ?
 Mo1 Fe1 2.7049(3) . ?
 Mo1 Fe2 2.7521(3) . ?
 Mo1 Fe3 2.7492(3) . ?
 Mo1 S1 2.3367(4) . ?
 Mo1 S2 2.3314(4) . ?
 Mo1 S3 2.3640(4) . ?
 C1 C2 1.418(2) . ?
 C1 C5 1.428(2) . ?
 C1 C6 1.502(2) . ?
 C2 C3 1.426(2) . ?
 C2 C7 1.500(2) . ?
 C3 C4 1.426(2) . ?
 C3 C8 1.503(2) . ?
 C4 C5 1.414(2) . ?
 C4 C9 1.499(2) . ?
 C5 C10 1.498(2) . ?
 C6 H6A 0.9800 . ?
 C6 H6B 0.9800 . ?
 C6 H6C 0.9800 . ?
 C7 H7A 0.9800 . ?
 C7 H7B 0.9800 . ?
 C7 H7C 0.9800 . ?
 C8 H8A 0.9800 . ?
 C8 H8B 0.9800 . ?
 C8 H8C 0.9800 . ?
 C9 H9A 0.9800 . ?
 C9 H9B 0.9800 . ?
 C9 H9C 0.9800 . ?
 C10 H10A 0.9800 . ?
 C10 H10B 0.9800 . ?
 C10 H10C 0.9800 . ?
 Fe1 N1 1.8112(13) . ?
 Fe1 Fe2 2.6828(3) . ?
 Fe1 Fe3 2.7049(3) . ?
 Fe1 S1 2.2517(4) . ?
 Fe1 S2 2.2486(4) . ?
 Fe1 S4 2.2956(4) . ?
 N1 N1 1.145(2) 5_666 ?
 Fe2 C11 2.0309(15) . ?
 Fe2 Fe3 2.7303(3) . ?
 Fe2 S1 2.2742(4) . ?
 Fe2 S3 2.2567(4) . ?
 Fe2 S4 2.2332(4) . ?
 C11 N2 1.3731(19) . ?
 C11 N3 1.3732(18) . ?
 C12 H12 0.9500 . ?
 C12 C13 1.339(2) . ?
 C12 N2 1.3893(19) . ?
 C13 H13 0.9500 . ?
 C13 N3 1.389(2) . ?
 N2 C21 1.4429(19) . ?
 C21 C22 1.401(2) . ?
 C21 C26 1.404(2) . ?
 C22 C23 1.395(2) . ?
 C22 C221 1.525(2) . ?
 C23 H23 0.9500 . ?
 C23 C24 1.387(3) . ?
 C24 H24 0.9500 . ?
 C24 C25 1.389(3) . ?
 C25 H25 0.9500 . ?
 C25 C26 1.401(2) . ?
 C26 C261 1.521(2) . ?
 C221 H221 1.0000 . ?
 C221 C222 1.533(3) . ?
 C221 C223 1.535(3) . ?
 C222 H22A 0.9800 . ?
 C222 H22B 0.9800 . ?
 C222 H22C 0.9800 . ?
 C223 H22D 0.9800 . ?
 C223 H22E 0.9800 . ?
 C223 H22F 0.9800 . ?
 C261 H261 1.0000 . ?
 C261 C262 1.526(2) . ?
 C261 C263 1.535(3) . ?
 C262 H26A 0.9800 . ?
 C262 H26B 0.9800 . ?
 C262 H26C 0.9800 . ?
 C263 H26D 0.9800 . ?
 C263 H26E 0.9800 . ?
 C263 H26F 0.9800 . ?
 N3 C31 1.4473(19) . ?
 C31 C32 1.403(2) . ?
 C31 C36 1.400(2) . ?
 C32 C33 1.397(2) . ?
 C32 C321 1.522(2) . ?
 C33 H33 0.9500 . ?
 C33 C34 1.390(2) . ?
 C34 H34 0.9500 . ?
 C34 C35 1.383(2) . ?
 C35 H35 0.9500 . ?
 C35 C36 1.394(2) . ?
 C36 C361 1.524(2) . ?
 C321 H321 1.0000 . ?
 C321 C322 1.538(2) . ?
 C321 C323 1.526(2) . ?
 C322 H32A 0.9800 . ?
 C322 H32B 0.9800 . ?
 C322 H32C 0.9800 . ?
 C323 H32D 0.9800 . ?
 C323 H32E 0.9800 . ?
 C323 H32F 0.9800 . ?
 C361 H361 1.0000 . ?
 C361 H36A 1.0000 . ?
 C361 C362 1.570(4) . ?
 C361 C363 1.503(3) . ?
 C361 C62C 1.425(11) . ?
 C361 C63C 1.669(10) . ?
 C362 H36B 0.9800 . ?
 C362 H36C 0.9800 . ?
 C362 H36D 0.9800 . ?
 C363 H36E 0.9800 . ?
 C363 H36F 0.9800 . ?
 C363 H36G 0.9800 . ?
 C62C H62A 0.9800 . ?
 C62C H62B 0.9800 . ?
 C62C H62C 0.9800 . ?
 C63C H63A 0.9800 . ?
 C63C H63B 0.9800 . ?
 C63C H63C 0.9800 . ?
 Fe3 C14 2.0194(14) . ?
 Fe3 S2 2.2602(4) . ?
 Fe3 S3 2.2535(4) . ?
 Fe3 S4 2.2163(4) . ?
 C14 N4 1.3779(19) . ?
 C14 N5 1.3783(18) . ?
 C15 H15 0.9500 . ?
 C15 C16 1.346(2) . ?
 C15 N4 1.3871(19) . ?
 C16 H16 0.9500 . ?
 C16 N5 1.391(2) . ?
 N4 C41 1.4464(19) . ?
 N5 C51 1.4443(19) . ?
 C41 C42 1.404(2) . ?
 C41 C46 1.397(2) . ?
 C42 C43 1.387(2) . ?
 C42 C421 1.543(3) . ?
 C43 H43 0.9500 . ?
 C43 C44 1.375(3) . ?
 C44 H44 0.9500 . ?
 C44 C45 1.389(3) . ?
 C45 H45 0.9500 . ?
 C45 C46 1.403(2) . ?
 C46 C461 1.512(3) . ?
 C421 H421 1.0000 . ?
 C421 C422 1.511(3) . ?
 C421 C423 1.522(3) . ?
 C422 H42A 0.9800 . ?
 C422 H42B 0.9800 . ?
 C422 H42C 0.9800 . ?
 C423 H42D 0.9800 . ?
 C423 H42E 0.9800 . ?
 C423 H42F 0.9800 . ?
 C461 H461 1.0000 . ?
 C461 C462 1.535(3) . ?
 C461 C463 1.535(3) . ?
 C462 H46A 0.9800 . ?
 C462 H46B 0.9800 . ?
 C462 H46C 0.9800 . ?
 C463 H46D 0.9800 . ?
 C463 H46E 0.9800 . ?
 C463 H46F 0.9800 . ?
 C51 C52 1.404(2) . ?
 C51 C56 1.400(2) . ?
 C52 C53 1.396(2) . ?
 C52 C521 1.518(2) . ?
 C53 H53 0.9500 . ?
 C53 C54 1.384(3) . ?
 C54 H54 0.9500 . ?
 C54 C55 1.380(3) . ?
 C55 H55 0.9500 . ?
 C55 C56 1.398(2) . ?
 C56 C561 1.524(3) . ?
 C521 H521 1.0000 . ?
 C521 C522 1.530(2) . ?
 C521 C523 1.531(2) . ?
 C522 H52A 0.9800 . ?
 C522 H52B 0.9800 . ?
 C522 H52C 0.9800 . ?
 C523 H52D 0.9800 . ?
 C523 H52E 0.9800 . ?
 C523 H52F 0.9800 . ?
 C561 H561 1.0000 . ?
 C561 H56A 1.0000 . ?
 C561 C562 1.507(5) . ?
 C561 C563 1.563(5) . ?
 C561 C62E 1.547(10) . ?
 C561 C63E 1.448(9) . ?
 C804 H80A 0.9900 . ?
 C804 H80B 0.9900 . ?
 C804 C805 1.504(9) . ?
 C804 C803 1.520(8) . ?
 C801 H80C 0.9800 . ?
 C801 H80D 0.9800 . ?
 C801 H80E 0.9800 . ?
 C801 C802 1.529(11) . ?
 C705 H70A 0.9800 . ?
 C705 H70B 0.9800 . ?
 C705 H70C 0.9800 . ?
 C705 C704 1.477(8) . ?
 C704 H70D 0.9900 . ?
 C704 H70E 0.9900 . ?
 C704 C703 1.495(8) . ?
 C703 H70F 0.9900 . ?
 C703 H70G 0.9900 . ?
 C703 C702 1.570(9) . ?
 C702 H70H 0.9900 . ?
 C702 H70I 0.9900 . ?
 C702 C701 1.456(7) . ?
 C701 H70J 0.9800 . ?
 C701 H70K 0.9800 . ?
 C701 H70L 0.9800 . ?
 C805 H80F 0.9800 . ?
 C805 H80G 0.9800 . ?
 C805 H80H 0.9800 . ?
 C562 H56B 0.9800 . ?
 C562 H56C 0.9800 . ?
 C562 H56D 0.9800 . ?
 C563 H56E 0.9800 . ?
 C563 H56F 0.9800 . ?
 C563 H56G 0.9800 . ?
 C62E H62D 0.9800 . ?
 C62E H62E 0.9800 . ?
 C62E H62F 0.9800 . ?
 C63E H63D 0.9800 . ?
 C63E H63E 0.9800 . ?
 C63E H63F 0.9800 . ?
 C901 H90A 0.9800 . ?
 C901 H90B 0.9800 . ?
 C901 H90C 0.9800 . ?
 C901 C902 1.309(13) . ?
 C902 H90D 0.9900 . ?
 C902 H90E 0.9900 . ?
 C902 C903 1.355(10) . ?
 C903 H90F 0.9900 . ?
 C903 H90G 0.9900 . ?
 C903 C904 1.217(10) . ?
 C904 H90H 0.9900 . ?
 C904 H90I 0.9900 . ?
 C904 C905 1.358(11) . ?
 C905 H90J 0.9800 . ?
 C905 H90K 0.9800 . ?
 C905 H90L 0.9800 . ?
 C91A H91A 0.9800 . ?
 C91A H91B 0.9800 . ?
 C91A H91C 0.9800 . ?
 C91A C92A 1.547(12) . ?
 C92A H92A 0.9900 . ?
 C92A H92B 0.9900 . ?
 C92A C93A 1.577(12) . ?
 C93A H93A 0.9900 . ?
 C93A H93B 0.9900 . ?
 C93A C94A 1.471(11) . ?
 C94A H94A 0.9900 . ?
 C94A H94B 0.9900 . ?
 C94A C95A 1.515(12) . ?
 C95A H95A 0.9800 . ?
 C95A H95B 0.9800 . ?
 C95A H95C 0.9800 . ?
 C802 H80I 0.9900 . ?
 C802 H80J 0.9900 . ?
 C802 C803 1.528(7) . ?
 C803 H80K 0.9900 . ?
 C803 H80L 0.9900 . ?

loop_
  _geom_angle_atom_site_label_1
  _geom_angle_atom_site_label_2
  _geom_angle_atom_site_label_3
  _geom_angle
  _geom_angle_site_symmetry_1
  _geom_angle_site_symmetry_3
  _geom_angle_publ_flag
 C1 Mo1 C2 34.52(5) . . ?
 C1 Mo1 C4 57.61(5) . . ?
 C1 Mo1 C5 34.82(5) . . ?
 C1 Mo1 Fe1 115.69(4) . . ?
 C1 Mo1 Fe2 143.88(4) . . ?
 C1 Mo1 Fe3 153.37(4) . . ?
 C2 Mo1 Fe1 123.91(4) . . ?
 C2 Mo1 Fe2 176.76(4) . . ?
 C2 Mo1 Fe3 122.92(4) . . ?
 C3 Mo1 C1 57.88(5) . . ?
 C3 Mo1 C2 34.73(5) . . ?
 C3 Mo1 C4 34.83(6) . . ?
 C3 Mo1 C5 57.70(6) . . ?
 C3 Mo1 Fe1 153.11(4) . . ?
 C3 Mo1 Fe2 143.30(4) . . ?
 C3 Mo1 Fe3 113.13(4) . . ?
 C4 Mo1 C2 57.46(5) . . ?
 C4 Mo1 C5 34.36(5) . . ?
 C4 Mo1 Fe1 167.93(4) . . ?
 C4 Mo1 Fe2 119.42(4) . . ?
 C4 Mo1 Fe3 131.42(4) . . ?
 C5 Mo1 C2 57.42(5) . . ?
 C5 Mo1 Fe1 134.24(4) . . ?
 C5 Mo1 Fe2 119.62(4) . . ?
 C5 Mo1 Fe3 165.29(4) . . ?
 Fe1 Mo1 Fe2 58.888(7) . . ?
 Fe1 Mo1 Fe3 59.457(7) . . ?
 Fe3 Mo1 Fe2 59.511(7) . . ?
 S1 Mo1 C1 94.59(4) . . ?
 S1 Mo1 C2 127.38(4) . . ?
 S1 Mo1 C3 146.57(4) . . ?
 S1 Mo1 C4 116.22(4) . . ?
 S1 Mo1 C5 88.90(4) . . ?
 S1 Mo1 Fe1 52.437(11) . . ?
 S1 Mo1 Fe2 52.317(10) . . ?
 S1 Mo1 Fe3 99.824(11) . . ?
 S1 Mo1 S3 102.218(14) . . ?
 S2 Mo1 C1 102.96(4) . . ?
 S2 Mo1 C2 84.23(4) . . ?
 S2 Mo1 C3 101.69(4) . . ?
 S2 Mo1 C4 136.42(4) . . ?
 S2 Mo1 C5 137.54(4) . . ?
 S2 Mo1 Fe1 52.396(10) . . ?
 S2 Mo1 Fe2 98.998(11) . . ?
 S2 Mo1 Fe3 52.042(11) . . ?
 S2 Mo1 S1 102.984(14) . . ?
 S2 Mo1 S3 102.134(13) . . ?
 S3 Mo1 C1 145.64(4) . . ?
 S3 Mo1 C2 127.49(4) . . ?
 S3 Mo1 C3 94.22(4) . . ?
 S3 Mo1 C4 88.03(4) . . ?
 S3 Mo1 C5 115.10(4) . . ?
 S3 Mo1 Fe1 98.204(11) . . ?
 S3 Mo1 Fe2 51.670(11) . . ?
 S3 Mo1 Fe3 51.630(10) . . ?
 C2 C1 Mo1 73.81(9) . . ?
 C2 C1 C5 108.18(13) . . ?
 C2 C1 C6 126.43(16) . . ?
 C5 C1 Mo1 73.29(9) . . ?
 C5 C1 C6 125.14(16) . . ?
 C6 C1 Mo1 123.34(11) . . ?
 C1 C2 Mo1 71.68(9) . . ?
 C1 C2 C3 107.78(14) . . ?
 C1 C2 C7 124.65(15) . . ?
 C3 C2 Mo1 71.44(9) . . ?
 C3 C2 C7 127.39(16) . . ?
 C7 C2 Mo1 126.27(11) . . ?
 C2 C3 Mo1 73.83(9) . . ?
 C2 C3 C8 126.74(16) . . ?
 C4 C3 Mo1 73.30(9) . . ?
 C4 C3 C2 107.86(14) . . ?
 C4 C3 C8 125.27(16) . . ?
 C8 C3 Mo1 121.87(11) . . ?
 C3 C4 Mo1 71.87(9) . . ?
 C3 C4 C9 124.53(16) . . ?
 C5 C4 Mo1 72.94(9) . . ?
 C5 C4 C3 108.19(13) . . ?
 C5 C4 C9 127.09(17) . . ?
 C9 C4 Mo1 124.92(11) . . ?
 C1 C5 Mo1 71.89(9) . . ?
 C1 C5 C10 126.04(16) . . ?
 C4 C5 Mo1 72.69(9) . . ?
 C4 C5 C1 107.90(14) . . ?
 C4 C5 C10 125.87(16) . . ?
 C10 C5 Mo1 125.05(11) . . ?
 C1 C6 H6A 109.5 . . ?
 C1 C6 H6B 109.5 . . ?
 C1 C6 H6C 109.5 . . ?
 H6A C6 H6B 109.5 . . ?
 H6A C6 H6C 109.5 . . ?
 H6B C6 H6C 109.5 . . ?
 C2 C7 H7A 109.5 . . ?
 C2 C7 H7B 109.5 . . ?
 C2 C7 H7C 109.5 . . ?
 H7A C7 H7B 109.5 . . ?
 H7A C7 H7C 109.5 . . ?
 H7B C7 H7C 109.5 . . ?
 C3 C8 H8A 109.5 . . ?
 C3 C8 H8B 109.5 . . ?
 C3 C8 H8C 109.5 . . ?
 H8A C8 H8B 109.5 . . ?
 H8A C8 H8C 109.5 . . ?
 H8B C8 H8C 109.5 . . ?
 C4 C9 H9A 109.5 . . ?
 C4 C9 H9B 109.5 . . ?
 C4 C9 H9C 109.5 . . ?
 H9A C9 H9B 109.5 . . ?
 H9A C9 H9C 109.5 . . ?
 H9B C9 H9C 109.5 . . ?
 C5 C10 H10A 109.5 . . ?
 C5 C10 H10B 109.5 . . ?
 C5 C10 H10C 109.5 . . ?
 H10A C10 H10B 109.5 . . ?
 H10A C10 H10C 109.5 . . ?
 H10B C10 H10C 109.5 . . ?
 N1 Fe1 Mo1 149.83(4) . . ?
 N1 Fe1 Fe2 139.25(4) . . ?
 N1 Fe1 Fe3 142.34(4) . . ?
 N1 Fe1 S1 113.55(4) . . ?
 N1 Fe1 S2 117.06(4) . . ?
 N1 Fe1 S4 109.33(4) . . ?
 Fe2 Fe1 Mo1 61.434(8) . . ?
 Fe2 Fe1 Fe3 60.895(8) . . ?
 Fe3 Fe1 Mo1 61.085(7) . . ?
 S1 Fe1 Mo1 55.346(11) . . ?
 S1 Fe1 Fe2 54.034(11) . . ?
 S1 Fe1 Fe3 103.402(12) . . ?
 S1 Fe1 S4 104.482(15) . . ?
 S2 Fe1 Mo1 55.231(11) . . ?
 S2 Fe1 Fe2 103.240(13) . . ?
 S2 Fe1 Fe3 53.335(12) . . ?
 S2 Fe1 S1 108.527(15) . . ?
 S2 Fe1 S4 102.620(15) . . ?
 S4 Fe1 Mo1 100.806(12) . . ?
 S4 Fe1 Fe2 52.607(11) . . ?
 S4 Fe1 Fe3 51.832(11) . . ?
 N1 N1 Fe1 178.06(19) 5_666 . ?
 Fe1 Fe2 Mo1 59.678(8) . . ?
 Fe1 Fe2 Fe3 59.952(8) . . ?
 C11 Fe2 Mo1 146.90(4) . . ?
 C11 Fe2 Fe1 131.63(4) . . ?
 C11 Fe2 Fe3 151.78(4) . . ?
 C11 Fe2 S1 104.03(4) . . ?
 C11 Fe2 S3 126.73(4) . . ?
 C11 Fe2 S4 109.70(4) . . ?
 Fe3 Fe2 Mo1 60.191(7) . . ?
 S1 Fe2 Mo1 54.406(11) . . ?
 S1 Fe2 Fe1 53.260(12) . . ?
 S1 Fe2 Fe3 102.009(13) . . ?
 S3 Fe2 Mo1 55.261(11) . . ?
 S3 Fe2 Fe1 101.624(13) . . ?
 S3 Fe2 Fe3 52.691(11) . . ?
 S3 Fe2 S1 107.709(15) . . ?
 S4 Fe2 Mo1 101.037(12) . . ?
 S4 Fe2 Fe1 54.754(11) . . ?
 S4 Fe2 Fe3 51.869(11) . . ?
 S4 Fe2 S1 105.802(16) . . ?
 S4 Fe2 S3 101.377(15) . . ?
 N2 C11 Fe2 128.21(10) . . ?
 N3 C11 Fe2 129.19(11) . . ?
 N3 C11 N2 102.30(12) . . ?
 C13 C12 H12 126.7 . . ?
 C13 C12 N2 106.54(14) . . ?
 N2 C12 H12 126.7 . . ?
 C12 C13 H13 126.5 . . ?
 C12 C13 N3 106.93(14) . . ?
 N3 C13 H13 126.5 . . ?
 C11 N2 C12 112.24(12) . . ?
 C11 N2 C21 128.41(12) . . ?
 C12 N2 C21 119.21(12) . . ?
 C22 C21 N2 118.08(13) . . ?
 C22 C21 C26 123.53(14) . . ?
 C26 C21 N2 117.77(14) . . ?
 C21 C22 C221 122.03(14) . . ?
 C23 C22 C21 117.11(15) . . ?
 C23 C22 C221 120.81(15) . . ?
 C22 C23 H23 119.5 . . ?
 C24 C23 C22 121.10(16) . . ?
 C24 C23 H23 119.5 . . ?
 C23 C24 H24 119.8 . . ?
 C23 C24 C25 120.42(16) . . ?
 C25 C24 H24 119.8 . . ?
 C24 C25 H25 119.5 . . ?
 C24 C25 C26 121.02(16) . . ?
 C26 C25 H25 119.5 . . ?
 C21 C26 C261 121.60(14) . . ?
 C25 C26 C21 116.81(16) . . ?
 C25 C26 C261 121.40(15) . . ?
 C22 C221 H221 108.1 . . ?
 C22 C221 C222 112.38(14) . . ?
 C22 C221 C223 111.14(17) . . ?
 C222 C221 H221 108.1 . . ?
 C222 C221 C223 108.79(15) . . ?
 C223 C221 H221 108.1 . . ?
 C221 C222 H22A 109.5 . . ?
 C221 C222 H22B 109.5 . . ?
 C221 C222 H22C 109.5 . . ?
 H22A C222 H22B 109.5 . . ?
 H22A C222 H22C 109.5 . . ?
 H22B C222 H22C 109.5 . . ?
 C221 C223 H22D 109.5 . . ?
 C221 C223 H22E 109.5 . . ?
 C221 C223 H22F 109.5 . . ?
 H22D C223 H22E 109.5 . . ?
 H22D C223 H22F 109.5 . . ?
 H22E C223 H22F 109.5 . . ?
 C26 C261 H261 107.5 . . ?
 C26 C261 C262 114.02(14) . . ?
 C26 C261 C263 110.00(16) . . ?
 C262 C261 H261 107.5 . . ?
 C262 C261 C263 110.02(14) . . ?
 C263 C261 H261 107.5 . . ?
 C261 C262 H26A 109.5 . . ?
 C261 C262 H26B 109.5 . . ?
 C261 C262 H26C 109.5 . . ?
 H26A C262 H26B 109.5 . . ?
 H26A C262 H26C 109.5 . . ?
 H26B C262 H26C 109.5 . . ?
 C261 C263 H26D 109.5 . . ?
 C261 C263 H26E 109.5 . . ?
 C261 C263 H26F 109.5 . . ?
 H26D C263 H26E 109.5 . . ?
 H26D C263 H26F 109.5 . . ?
 H26E C263 H26F 109.5 . . ?
 C11 N3 C13 111.98(13) . . ?
 C11 N3 C31 129.10(12) . . ?
 C13 N3 C31 117.92(12) . . ?
 C32 C31 N3 119.42(13) . . ?
 C36 C31 N3 116.64(13) . . ?
 C36 C31 C32 123.37(14) . . ?
 C31 C32 C321 121.62(13) . . ?
 C33 C32 C31 116.71(14) . . ?
 C33 C32 C321 121.58(14) . . ?
 C32 C33 H33 119.4 . . ?
 C34 C33 C32 121.13(15) . . ?
 C34 C33 H33 119.4 . . ?
 C33 C34 H34 119.7 . . ?
 C35 C34 C33 120.60(15) . . ?
 C35 C34 H34 119.7 . . ?
 C34 C35 H35 119.6 . . ?
 C34 C35 C36 120.71(15) . . ?
 C36 C35 H35 119.6 . . ?
 C31 C36 C361 122.10(14) . . ?
 C35 C36 C31 117.45(15) . . ?
 C35 C36 C361 120.44(15) . . ?
 C32 C321 H321 107.8 . . ?
 C32 C321 C322 109.94(12) . . ?
 C32 C321 C323 113.28(13) . . ?
 C322 C321 H321 107.8 . . ?
 C323 C321 H321 107.8 . . ?
 C323 C321 C322 110.09(13) . . ?
 C321 C322 H32A 109.5 . . ?
 C321 C322 H32B 109.5 . . ?
 C321 C322 H32C 109.5 . . ?
 H32A C322 H32B 109.5 . . ?
 H32A C322 H32C 109.5 . . ?
 H32B C322 H32C 109.5 . . ?
 C321 C323 H32D 109.5 . . ?
 C321 C323 H32E 109.5 . . ?
 C321 C323 H32F 109.5 . . ?
 H32D C323 H32E 109.5 . . ?
 H32D C323 H32F 109.5 . . ?
 H32E C323 H32F 109.5 . . ?
 C36 C361 H361 108.1 . . ?
 C36 C361 H36A 108.2 . . ?
 C36 C361 C362 109.87(17) . . ?
 C36 C361 C63C 107.2(4) . . ?
 C362 C361 H361 108.1 . . ?
 C363 C361 C36 111.99(18) . . ?
 C363 C361 H361 108.1 . . ?
 C363 C361 C362 110.6(2) . . ?
 C62C C361 C36 117.6(5) . . ?
 C62C C361 H36A 108.2 . . ?
 C62C C361 C63C 107.2(8) . . ?
 C63C C361 H36A 108.2 . . ?
 C361 C362 H36B 109.5 . . ?
 C361 C362 H36C 109.5 . . ?
 C361 C362 H36D 109.5 . . ?
 H36B C362 H36C 109.5 . . ?
 H36B C362 H36D 109.5 . . ?
 H36C C362 H36D 109.5 . . ?
 C361 C363 H36E 109.5 . . ?
 C361 C363 H36F 109.5 . . ?
 C361 C363 H36G 109.5 . . ?
 H36E C363 H36F 109.5 . . ?
 H36E C363 H36G 109.5 . . ?
 H36F C363 H36G 109.5 . . ?
 C361 C62C H62A 109.5 . . ?
 C361 C62C H62B 109.5 . . ?
 C361 C62C H62C 109.5 . . ?
 H62A C62C H62B 109.5 . . ?
 H62A C62C H62C 109.5 . . ?
 H62B C62C H62C 109.5 . . ?
 C361 C63C H63A 109.5 . . ?
 C361 C63C H63B 109.5 . . ?
 C361 C63C H63C 109.5 . . ?
 H63A C63C H63B 109.5 . . ?
 H63A C63C H63C 109.5 . . ?
 H63B C63C H63C 109.5 . . ?
 Fe1 Fe3 Mo1 59.458(7) . . ?
 Fe1 Fe3 Fe2 59.154(8) . . ?
 Fe2 Fe3 Mo1 60.298(8) . . ?
 C14 Fe3 Mo1 146.80(4) . . ?
 C14 Fe3 Fe1 136.73(4) . . ?
 C14 Fe3 Fe2 149.63(4) . . ?
 C14 Fe3 S2 107.79(4) . . ?
 C14 Fe3 S3 122.22(4) . . ?
 C14 Fe3 S4 110.65(4) . . ?
 S2 Fe3 Mo1 54.419(11) . . ?
 S2 Fe3 Fe1 52.938(11) . . ?
 S2 Fe3 Fe2 101.467(13) . . ?
 S3 Fe3 Mo1 55.334(11) . . ?
 S3 Fe3 Fe1 101.045(13) . . ?
 S3 Fe3 Fe2 52.799(12) . . ?
 S3 Fe3 S2 108.039(15) . . ?
 S4 Fe3 Mo1 101.574(12) . . ?
 S4 Fe3 Fe1 54.522(12) . . ?
 S4 Fe3 Fe2 52.430(11) . . ?
 S4 Fe3 S2 104.808(16) . . ?
 S4 Fe3 S3 102.009(16) . . ?
 N4 C14 Fe3 126.45(10) . . ?
 N4 C14 N5 102.12(12) . . ?
 N5 C14 Fe3 131.43(11) . . ?
 C16 C15 H15 126.6 . . ?
 C16 C15 N4 106.71(14) . . ?
 N4 C15 H15 126.6 . . ?
 C15 C16 H16 126.7 . . ?
 C15 C16 N5 106.65(13) . . ?
 N5 C16 H16 126.7 . . ?
 C14 N4 C15 112.34(12) . . ?
 C14 N4 C41 125.37(12) . . ?
 C15 N4 C41 122.23(13) . . ?
 C14 N5 C16 112.18(13) . . ?
 C14 N5 C51 127.01(12) . . ?
 C16 N5 C51 120.70(12) . . ?
 C42 C41 N4 116.95(14) . . ?
 C46 C41 N4 119.18(14) . . ?
 C46 C41 C42 123.85(15) . . ?
 C41 C42 C421 121.57(15) . . ?
 C43 C42 C41 116.98(17) . . ?
 C43 C42 C421 121.45(17) . . ?
 C42 C43 H43 119.6 . . ?
 C44 C43 C42 120.83(19) . . ?
 C44 C43 H43 119.6 . . ?
 C43 C44 H44 119.4 . . ?
 C43 C44 C45 121.22(17) . . ?
 C45 C44 H44 119.4 . . ?
 C44 C45 H45 119.8 . . ?
 C44 C45 C46 120.49(18) . . ?
 C46 C45 H45 119.8 . . ?
 C41 C46 C45 116.41(17) . . ?
 C41 C46 C461 121.24(15) . . ?
 C45 C46 C461 122.30(16) . . ?
 C42 C421 H421 106.9 . . ?
 C422 C421 C42 111.07(15) . . ?
 C422 C421 H421 106.9 . . ?
 C422 C421 C423 111.00(17) . . ?
 C423 C421 C42 113.64(17) . . ?
 C423 C421 H421 106.9 . . ?
 C421 C422 H42A 109.5 . . ?
 C421 C422 H42B 109.5 . . ?
 C421 C422 H42C 109.5 . . ?
 H42A C422 H42B 109.5 . . ?
 H42A C422 H42C 109.5 . . ?
 H42B C422 H42C 109.5 . . ?
 C421 C423 H42D 109.5 . . ?
 C421 C423 H42E 109.5 . . ?
 C421 C423 H42F 109.5 . . ?
 H42D C423 H42E 109.5 . . ?
 H42D C423 H42F 109.5 . . ?
 H42E C423 H42F 109.5 . . ?
 C46 C461 H461 107.7 . . ?
 C46 C461 C462 110.59(15) . . ?
 C46 C461 C463 113.15(18) . . ?
 C462 C461 H461 107.7 . . ?
 C462 C461 C463 109.67(16) . . ?
 C463 C461 H461 107.7 . . ?
 C461 C462 H46A 109.5 . . ?
 C461 C462 H46B 109.5 . . ?
 C461 C462 H46C 109.5 . . ?
 H46A C462 H46B 109.5 . . ?
 H46A C462 H46C 109.5 . . ?
 H46B C462 H46C 109.5 . . ?
 C461 C463 H46D 109.5 . . ?
 C461 C463 H46E 109.5 . . ?
 C461 C463 H46F 109.5 . . ?
 H46D C463 H46E 109.5 . . ?
 H46D C463 H46F 109.5 . . ?
 H46E C463 H46F 109.5 . . ?
 C52 C51 N5 119.01(14) . . ?
 C56 C51 N5 117.51(15) . . ?
 C56 C51 C52 123.23(15) . . ?
 C51 C52 C521 121.17(14) . . ?
 C53 C52 C51 116.93(16) . . ?
 C53 C52 C521 121.79(15) . . ?
 C52 C53 H53 119.5 . . ?
 C54 C53 C52 121.05(17) . . ?
 C54 C53 H53 119.5 . . ?
 C53 C54 H54 119.7 . . ?
 C55 C54 C53 120.66(16) . . ?
 C55 C54 H54 119.7 . . ?
 C54 C55 H55 119.5 . . ?
 C54 C55 C56 120.94(17) . . ?
 C56 C55 H55 119.5 . . ?
 C51 C56 C561 122.66(15) . . ?
 C55 C56 C51 117.13(16) . . ?
 C55 C56 C561 120.21(16) . . ?
 C52 C521 H521 107.8 . . ?
 C52 C521 C522 113.60(14) . . ?
 C52 C521 C523 110.44(14) . . ?
 C522 C521 H521 107.8 . . ?
 C522 C521 C523 109.22(14) . . ?
 C523 C521 H521 107.8 . . ?
 C521 C522 H52A 109.5 . . ?
 C521 C522 H52B 109.5 . . ?
 C521 C522 H52C 109.5 . . ?
 H52A C522 H52B 109.5 . . ?
 H52A C522 H52C 109.5 . . ?
 H52B C522 H52C 109.5 . . ?
 C521 C523 H52D 109.5 . . ?
 C521 C523 H52E 109.5 . . ?
 C521 C523 H52F 109.5 . . ?
 H52D C523 H52E 109.5 . . ?
 H52D C523 H52F 109.5 . . ?
 H52E C523 H52F 109.5 . . ?
 C56 C561 H561 107.4 . . ?
 C56 C561 H56A 106.4 . . ?
 C56 C561 C563 110.4(2) . . ?
 C56 C561 C62E 112.6(5) . . ?
 C562 C561 C56 112.9(2) . . ?
 C562 C561 H561 107.4 . . ?
 C562 C561 C563 111.0(3) . . ?
 C563 C561 H561 107.4 . . ?
 C62E C561 H56A 106.4 . . ?
 C63E C561 C56 111.9(4) . . ?
 C63E C561 H56A 106.4 . . ?
 C63E C561 C62E 112.5(5) . . ?
 H80A C804 H80B 107.6 . . ?
 C805 C804 H80A 108.7 . . ?
 C805 C804 H80B 108.7 . . ?
 C805 C804 C803 114.2(6) . . ?
 C803 C804 H80A 108.7 . . ?
 C803 C804 H80B 108.7 . . ?
 H80C C801 H80D 109.5 . . ?
 H80C C801 H80E 109.5 . . ?
 H80D C801 H80E 109.5 . . ?
 C802 C801 H80C 109.5 . . ?
 C802 C801 H80D 109.5 . . ?
 C802 C801 H80E 109.5 . . ?
 H70A C705 H70B 109.5 . . ?
 H70A C705 H70C 109.5 . . ?
 H70B C705 H70C 109.5 . . ?
 C704 C705 H70A 109.5 . . ?
 C704 C705 H70B 109.5 . . ?
 C704 C705 H70C 109.5 . . ?
 C705 C704 H70D 107.4 . . ?
 C705 C704 H70E 107.4 . . ?
 C705 C704 C703 119.6(6) . . ?
 H70D C704 H70E 107.0 . . ?
 C703 C704 H70D 107.4 . . ?
 C703 C704 H70E 107.4 . . ?
 C704 C703 H70F 110.0 . . ?
 C704 C703 H70G 110.0 . . ?
 C704 C703 C702 108.4(6) . . ?
 H70F C703 H70G 108.4 . . ?
 C702 C703 H70F 110.0 . . ?
 C702 C703 H70G 110.0 . . ?
 C703 C702 H70H 108.6 . . ?
 C703 C702 H70I 108.6 . . ?
 H70H C702 H70I 107.6 . . ?
 C701 C702 C703 114.5(5) . . ?
 C701 C702 H70H 108.6 . . ?
 C701 C702 H70I 108.6 . . ?
 C702 C701 H70J 109.5 . . ?
 C702 C701 H70K 109.5 . . ?
 C702 C701 H70L 109.5 . . ?
 H70J C701 H70K 109.5 . . ?
 H70J C701 H70L 109.5 . . ?
 H70K C701 H70L 109.5 . . ?
 C804 C805 H80F 109.5 . . ?
 C804 C805 H80G 109.5 . . ?
 C804 C805 H80H 109.5 . . ?
 H80F C805 H80G 109.5 . . ?
 H80F C805 H80H 109.5 . . ?
 H80G C805 H80H 109.5 . . ?
 C561 C562 H56B 109.5 . . ?
 C561 C562 H56C 109.5 . . ?
 C561 C562 H56D 109.5 . . ?
 H56B C562 H56C 109.5 . . ?
 H56B C562 H56D 109.5 . . ?
 H56C C562 H56D 109.5 . . ?
 C561 C563 H56E 109.5 . . ?
 C561 C563 H56F 109.5 . . ?
 C561 C563 H56G 109.5 . . ?
 H56E C563 H56F 109.5 . . ?
 H56E C563 H56G 109.5 . . ?
 H56F C563 H56G 109.5 . . ?
 C561 C62E H62D 109.5 . . ?
 C561 C62E H62E 109.5 . . ?
 C561 C62E H62F 109.5 . . ?
 H62D C62E H62E 109.5 . . ?
 H62D C62E H62F 109.5 . . ?
 H62E C62E H62F 109.5 . . ?
 C561 C63E H63D 109.5 . . ?
 C561 C63E H63E 109.5 . . ?
 C561 C63E H63F 109.5 . . ?
 H63D C63E H63E 109.5 . . ?
 H63D C63E H63F 109.5 . . ?
 H63E C63E H63F 109.5 . . ?
 Fe1 S1 Mo1 72.217(12) . . ?
 Fe1 S1 Fe2 72.706(13) . . ?
 Fe2 S1 Mo1 73.278(12) . . ?
 Fe1 S2 Mo1 72.373(12) . . ?
 Fe1 S2 Fe3 73.727(14) . . ?
 Fe3 S2 Mo1 73.539(12) . . ?
 Fe2 S3 Mo1 73.069(12) . . ?
 Fe3 S3 Mo1 73.035(12) . . ?
 Fe3 S3 Fe2 74.510(13) . . ?
 Fe2 S4 Fe1 72.639(13) . . ?
 Fe3 S4 Fe1 73.646(13) . . ?
 Fe3 S4 Fe2 75.702(13) . . ?
 H90A C901 H90B 109.5 . . ?
 H90A C901 H90C 109.5 . . ?
 H90B C901 H90C 109.5 . . ?
 C902 C901 H90A 109.5 . . ?
 C902 C901 H90B 109.5 . . ?
 C902 C901 H90C 109.5 . . ?
 C901 C902 H90D 104.4 . . ?
 C901 C902 H90E 104.4 . . ?
 C901 C902 C903 131.3(16) . . ?
 H90D C902 H90E 105.6 . . ?
 C903 C902 H90D 104.4 . . ?
 C903 C902 H90E 104.4 . . ?
 C902 C903 H90F 99.3 . . ?
 C902 C903 H90G 99.3 . . ?
 H90F C903 H90G 104.0 . . ?
 C904 C903 C902 149.6(13) . . ?
 C904 C903 H90F 99.3 . . ?
 C904 C903 H90G 99.3 . . ?
 C903 C904 H90H 100.4 . . ?
 C903 C904 H90I 100.4 . . ?
 C903 C904 C905 145.8(17) . . ?
 H90H C904 H90I 104.3 . . ?
 C905 C904 H90H 100.4 . . ?
 C905 C904 H90I 100.4 . . ?
 C904 C905 H90J 109.5 . . ?
 C904 C905 H90K 109.5 . . ?
 C904 C905 H90L 109.5 . . ?
 H90J C905 H90K 109.5 . . ?
 H90J C905 H90L 109.5 . . ?
 H90K C905 H90L 109.5 . . ?
 H91A C91A H91B 109.5 . . ?
 H91A C91A H91C 109.5 . . ?
 H91B C91A H91C 109.5 . . ?
 C92A C91A H91A 109.5 . . ?
 C92A C91A H91B 109.5 . . ?
 C92A C91A H91C 109.5 . . ?
 C91A C92A H92A 109.2 . . ?
 C91A C92A H92B 109.2 . . ?
 C91A C92A C93A 112.0(8) . . ?
 H92A C92A H92B 107.9 . . ?
 C93A C92A H92A 109.2 . . ?
 C93A C92A H92B 109.2 . . ?
 C92A C93A H93A 108.0 . . ?
 C92A C93A H93B 108.0 . . ?
 H93A C93A H93B 107.2 . . ?
 C94A C93A C92A 117.4(8) . . ?
 C94A C93A H93A 108.0 . . ?
 C94A C93A H93B 108.0 . . ?
 C93A C94A H94A 106.5 . . ?
 C93A C94A H94B 106.5 . . ?
 C93A C94A C95A 123.2(12) . . ?
 H94A C94A H94B 106.5 . . ?
 C95A C94A H94A 106.5 . . ?
 C95A C94A H94B 106.5 . . ?
 C94A C95A H95A 109.5 . . ?
 C94A C95A H95B 109.5 . . ?
 C94A C95A H95C 109.5 . . ?
 H95A C95A H95B 109.5 . . ?
 H95A C95A H95C 109.5 . . ?
 H95B C95A H95C 109.5 . . ?
 C801 C802 H80I 109.0 . . ?
 C801 C802 H80J 109.0 . . ?
 H80I C802 H80J 107.8 . . ?
 C803 C802 C801 112.9(7) . . ?
 C803 C802 H80I 109.0 . . ?
 C803 C802 H80J 109.0 . . ?
 C804 C803 C802 112.5(4) . . ?
 C804 C803 H80K 109.1 . . ?
 C804 C803 H80L 109.1 . . ?
 C802 C803 H80K 109.1 . . ?
 C802 C803 H80L 109.1 . . ?
 H80K C803 H80L 107.8 . . ?

_shelx_res_file
;
TITL vor in C2/c
    p8_19119_2m.res
    created by SHELXL-2018/1 at 11:20:19 on 19-Nov-2019
REM #####
CELL 0.71073 41.8281 14.7749 27.656 90 118.3945 90
ZERR 8 0.0028 0.0008 0.0019 0 0.0024 0
LATT 7
SYMM -X,+Y,0.5-Z
SFAC C H Fe Mo N S
UNIT 592 888 24 8 40 32
SADI C901 C902 C902 C903 C903 C904 C904 C905
SADI C901 C903 C902 C904 C903 C905
SADI C91A C92A C92A C93A C93A C94A C94A C95A
SADI C91A C93A C92A C94A C93A C95A
SADI C801 C802 C802 C803 C803 C804 C804 C805
SADI C801 C803 C802 C804 C803 C805
SADI C701 C702 C702 C703 C703 C704 C704 C705
SADI C701 C703 C702 C704 C703 C705
SIMU
RIGU

L.S. 50
PLAN  8
SIZE 0.27 0.28 0.65
TEMP -173.15
LIST 6
BOND $H
fmap 2
acta
REM <olex2.extras>
REM <HklSrc "%.\\P8_19119_2m.hkl">
REM </olex2.extras>

WGHT    0.036300   18.036901
FVAR       0.08519   0.77148   0.65572   0.60088
MO1   4    0.391535    0.309672    0.440566    11.00000    0.01202    0.01228 =
         0.01333    0.00056    0.00502   -0.00027
C1    1    0.406690    0.224561    0.521533    11.00000    0.02105    0.01950 =
         0.01805    0.00422    0.00679   -0.00238
C2    1    0.377285    0.281345    0.513787    11.00000    0.02811    0.01684 =
         0.02025    0.00226    0.01384    0.00002
C3    1    0.346677    0.256619    0.463037    11.00000    0.01783    0.02694 =
         0.02247    0.00673    0.01081    0.00030
C4    1    0.356927    0.181275    0.441213    11.00000    0.02423    0.02050 =
         0.01789   -0.00045    0.00943   -0.00979
C5    1    0.393855    0.161452    0.477134    11.00000    0.02508    0.01450 =
         0.02406    0.00320    0.01336   -0.00040
C6    1    0.443960    0.223952    0.570448    11.00000    0.02775    0.03925 =
         0.02661    0.01074    0.00092   -0.00451
AFIX 137
H6A   2    0.461601    0.201970    0.559327    11.00000   -1.50000
H6B   2    0.444097    0.184001    0.598832    11.00000   -1.50000
H6C   2    0.450508    0.285487    0.585110    11.00000   -1.50000
AFIX   0
C7    1    0.378405    0.349199    0.554918    11.00000    0.05340    0.02622 =
         0.02534   -0.00213    0.02577    0.00003
AFIX 137
H7A   2    0.401824    0.380779    0.571332    11.00000   -1.50000
H7B   2    0.375412    0.318003    0.583782    11.00000   -1.50000
H7C   2    0.358711    0.393139    0.536509    11.00000   -1.50000
AFIX   0
C8    1    0.309307    0.297506    0.438240    11.00000    0.02180    0.04843 =
         0.04071    0.01654    0.01764    0.00753
AFIX 137
H8A   2    0.309575    0.350196    0.459954    11.00000   -1.50000
H8B   2    0.292061    0.252551    0.438181    11.00000   -1.50000
H8C   2    0.301919    0.316430    0.400417    11.00000   -1.50000
AFIX   0
C9    1    0.331348    0.128855    0.391282    11.00000    0.04376    0.03456 =
         0.02369   -0.00542    0.01303   -0.02340
AFIX 137
H9A   2    0.313460    0.170169    0.364202    11.00000   -1.50000
H9B   2    0.318789    0.083080    0.401702    11.00000   -1.50000
H9C   2    0.345071    0.099040    0.375293    11.00000   -1.50000
AFIX   0
C10   1    0.414788    0.083162    0.471989    11.00000    0.04690    0.01950 =
         0.05222    0.00663    0.03441    0.00652
AFIX 137
H10A  2    0.405024    0.067121    0.433132    11.00000   -1.50000
H10B  2    0.412596    0.031177    0.492227    11.00000   -1.50000
H10C  2    0.440441    0.099964    0.487244    11.00000   -1.50000
AFIX   0
FE1   3    0.442324    0.429648    0.447240    11.00000    0.01150    0.01465 =
         0.01613   -0.00040    0.00457   -0.00164
N1    5    0.486011    0.483928    0.486991    11.00000    0.01614    0.01945 =
         0.01932   -0.00017    0.00737   -0.00067
FE2   3    0.406837    0.332079    0.354902    11.00000    0.01439    0.01213 =
         0.01485    0.00030    0.00694    0.00027
C11   1    0.423887    0.273448    0.304742    11.00000    0.01454    0.01394 =
         0.01544    0.00077    0.00552   -0.00080
C12   1    0.444161    0.168552    0.264472    11.00000    0.02727    0.01770 =
         0.02519   -0.00048    0.01693    0.00169
AFIX  43
H12   2    0.450009    0.111744    0.254594    11.00000   -1.20000
AFIX   0
C13   1    0.448429    0.250176    0.247318    11.00000    0.02917    0.01967 =
         0.02575    0.00012    0.01887    0.00137
AFIX  43
H13   2    0.457978    0.262451    0.222953    11.00000   -1.20000
AFIX   0
N2    5    0.429500    0.183208    0.299553    11.00000    0.01807    0.01404 =
         0.01865    0.00049    0.01032    0.00053
C21   1    0.420080    0.106440    0.322494    11.00000    0.02417    0.01148 =
         0.02211   -0.00096    0.01343   -0.00065
C22   1    0.448287    0.058883    0.365411    11.00000    0.02662    0.01606 =
         0.02617    0.00202    0.01587    0.00393
C23   1    0.439341   -0.023097    0.381005    11.00000    0.03910    0.01521 =
         0.03182    0.00537    0.02149    0.00632
AFIX  43
H23   2    0.457833   -0.057599    0.409631    11.00000   -1.20000
AFIX   0
C24   1    0.403910   -0.055048    0.355418    11.00000    0.04653    0.01301 =
         0.03648   -0.00103    0.02729   -0.00346
AFIX  43
H24   2    0.398390   -0.111094    0.366598    11.00000   -1.20000
AFIX   0
C25   1    0.376432   -0.005620    0.313536    11.00000    0.03634    0.01902 =
         0.03369   -0.00663    0.02059   -0.01026
AFIX  43
H25   2    0.352205   -0.027795    0.296846    11.00000   -1.20000
AFIX   0
C26   1    0.383894    0.076401    0.295533    11.00000    0.02524    0.01802 =
         0.02394   -0.00437    0.01397   -0.00461
C221  1    0.487498    0.092359    0.392667    11.00000    0.02306    0.02748 =
         0.03190    0.01064    0.01360    0.00631
AFIX  13
H221  2    0.487335    0.157545    0.382822    11.00000   -1.20000
AFIX   0
C222  1    0.505948    0.085023    0.455463    11.00000    0.02653    0.02482 =
         0.03308    0.00617    0.01170    0.00550
AFIX 137
H22A  2    0.491380    0.117179    0.469168    11.00000   -1.50000
H22B  2    0.530239    0.112048    0.471273    11.00000   -1.50000
H22C  2    0.508025    0.021151    0.466103    11.00000   -1.50000
AFIX   0
C223  1    0.510145    0.039710    0.371787    11.00000    0.03535    0.07621 =
         0.04190    0.01357    0.02278    0.02265
AFIX 137
H22D  2    0.510384   -0.024620    0.380587    11.00000   -1.50000
H22E  2    0.535081    0.063006    0.389561    11.00000   -1.50000
H22F  2    0.499428    0.047129    0.331882    11.00000   -1.50000
AFIX   0
C261  1    0.354782    0.126351    0.246073    11.00000    0.02291    0.02782 =
         0.02276   -0.00338    0.00803   -0.00815
AFIX  13
H261  2    0.362342    0.191230    0.249297    11.00000   -1.20000
AFIX   0
C262  1    0.317202    0.123869    0.242373    11.00000    0.02552    0.03117 =
         0.02897   -0.00565    0.01237   -0.00508
AFIX 137
H26A  2    0.308471    0.061242    0.237238    11.00000   -1.50000
H26B  2    0.300316    0.160665    0.211138    11.00000   -1.50000
H26C  2    0.318691    0.148105    0.276370    11.00000   -1.50000
AFIX   0
C263  1    0.352807    0.088993    0.192943    11.00000    0.02861    0.08152 =
         0.02608   -0.00796    0.01300   -0.00435
AFIX 137
H26D  2    0.376629    0.094987    0.194554    11.00000   -1.50000
H26E  2    0.334690    0.123137    0.161422    11.00000   -1.50000
H26F  2    0.345842    0.025000    0.188924    11.00000   -1.50000
AFIX   0
N3    5    0.436231    0.313524    0.271941    11.00000    0.02079    0.01408 =
         0.01869    0.00101    0.01092    0.00036
C31   1    0.432278    0.406309    0.253168    11.00000    0.02049    0.01476 =
         0.01862    0.00206    0.01152    0.00076
C32   1    0.459478    0.469489    0.283928    11.00000    0.02055    0.01753 =
         0.01905    0.00091    0.01235    0.00034
C33   1    0.457107    0.553766    0.259569    11.00000    0.02466    0.01672 =
         0.02386    0.00145    0.01412   -0.00144
AFIX  43
H33   2    0.474817    0.598758    0.279164    11.00000   -1.20000
AFIX   0
C34   1    0.429282    0.572936    0.207154    11.00000    0.02866    0.01837 =
         0.02887    0.00801    0.01629    0.00333
AFIX  43
H34   2    0.428584    0.630119    0.190972    11.00000   -1.20000
AFIX   0
C35   1    0.402598    0.509512    0.178337    11.00000    0.02447    0.02505 =
         0.02291    0.00745    0.00963    0.00371
AFIX  43
H35   2    0.383514    0.523962    0.142802    11.00000   -1.20000
AFIX   0
C36   1    0.403410    0.424593    0.200885    11.00000    0.02144    0.02178 =
         0.02066    0.00201    0.01033    0.00020
C321  1    0.491188    0.445546    0.339695    11.00000    0.01926    0.02134 =
         0.01825    0.00050    0.01102    0.00004
AFIX  13
H321  2    0.481727    0.405302    0.359096    11.00000   -1.20000
AFIX   0
C322  1    0.519976    0.392114    0.331956    11.00000    0.02347    0.03356 =
         0.02332    0.00238    0.01306    0.00576
AFIX 137
H32A  2    0.509512    0.334754    0.313349    11.00000   -1.50000
H32B  2    0.540884    0.379844    0.367943    11.00000   -1.50000
H32C  2    0.527881    0.427688    0.309644    11.00000   -1.50000
AFIX   0
C323  1    0.508543    0.527962    0.376139    11.00000    0.02454    0.02784 =
         0.02365   -0.00426    0.01015   -0.00500
AFIX 137
H32D  2    0.519836    0.566159    0.359493    11.00000   -1.50000
H32E  2    0.527096    0.507948    0.412548    11.00000   -1.50000
H32F  2    0.489838    0.562694    0.379777    11.00000   -1.50000
AFIX   0
C361  1    0.373960    0.354968    0.168885    11.00000    0.02456    0.02622 =
         0.02682    0.00026    0.00614   -0.00442
PART 1
AFIX  13
H361  2    0.378159    0.301244    0.193176    21.00000   -1.20000
AFIX  13
PART 0
PART 2
H36A  2    0.384025    0.293458    0.183072   -21.00000   -1.20000
AFIX   0
PART 0
PART 1
C362  1    0.376935    0.323062    0.117030    21.00000    0.03522    0.04031 =
         0.02534   -0.00561    0.00840   -0.00616
AFIX 137
H36B  2    0.375338    0.375706    0.094431    21.00000   -1.50000
H36C  2    0.357054    0.281078    0.095457    21.00000   -1.50000
H36D  2    0.400270    0.292482    0.128831    21.00000   -1.50000
AFIX   0
C363  1    0.336563    0.391003    0.152353    21.00000    0.02252    0.04102 =
         0.05299   -0.00647    0.01260   -0.00617
AFIX 137
H36E  2    0.335257    0.411009    0.185154    21.00000   -1.50000
H36F  2    0.318572    0.343213    0.133862    21.00000   -1.50000
H36G  2    0.331478    0.442285    0.127264    21.00000   -1.50000
AFIX   0
PART 0
PART 2
C62C  1    0.358921    0.354070    0.110573   -21.00000    0.06765    0.06185 =
         0.02672   -0.01384    0.01640   -0.03202
AFIX 137
H62A  2    0.345110    0.409882    0.095262   -21.00000   -1.50000
H62B  2    0.342740    0.301788    0.095469   -21.00000   -1.50000
H62C  2    0.378575    0.349922    0.100897   -21.00000   -1.50000
AFIX   0
C63C  1    0.339808    0.374323    0.182680   -21.00000    0.02820    0.03130 =
         0.04215   -0.00294    0.01682   -0.00372
AFIX 137
H63A  2    0.348723    0.369716    0.222392   -21.00000   -1.50000
H63B  2    0.320594    0.329449    0.163626   -21.00000   -1.50000
H63C  2    0.330057    0.435167    0.170121   -21.00000   -1.50000
AFIX   0
PART 0
FE3   3    0.371435    0.465548    0.378870    11.00000    0.01196    0.01314 =
         0.01596    0.00140    0.00593    0.00102
C14   1    0.339041    0.575875    0.355302    11.00000    0.01405    0.01466 =
         0.01572    0.00057    0.00540   -0.00009
C15   1    0.320511    0.723494    0.333622    11.00000    0.01907    0.01460 =
         0.02902    0.00382    0.00776    0.00393
AFIX  43
H15   2    0.321318    0.786600    0.327704    11.00000   -1.20000
AFIX   0
C16   1    0.291325    0.675579    0.327013    11.00000    0.01589    0.01749 =
         0.03321    0.00476    0.00740    0.00434
AFIX  43
H16   2    0.267561    0.698327    0.315632    11.00000   -1.20000
AFIX   0
N4    5    0.349174    0.662871    0.350743    11.00000    0.01409    0.01445 =
         0.02055    0.00135    0.00583    0.00026
N5    5    0.302732    0.586310    0.340088    11.00000    0.01339    0.01475 =
         0.02462    0.00252    0.00616    0.00125
C41   1    0.384848    0.689969    0.359876    11.00000    0.01585    0.01153 =
         0.02834   -0.00019    0.00975   -0.00028
C42   1    0.389113    0.704185    0.313060    11.00000    0.02920    0.01633 =
         0.03784   -0.00046    0.01998   -0.00224
C43   1    0.423730    0.725843    0.321796    11.00000    0.03475    0.02077 =
         0.05982   -0.00125    0.03227   -0.00182
AFIX  43
H43   2    0.427802    0.735445    0.291194    11.00000   -1.20000
AFIX   0
C44   1    0.452229    0.733588    0.374209    11.00000    0.02567    0.02202 =
         0.07605   -0.00177    0.02926   -0.00161
AFIX  43
H44   2    0.475888    0.746161    0.379224    11.00000   -1.20000
AFIX   0
C45   1    0.447059    0.723366    0.419946    11.00000    0.01833    0.01820 =
         0.05262   -0.00618    0.00462   -0.00187
AFIX  43
H45   2    0.467029    0.730526    0.455742    11.00000   -1.20000
AFIX   0
C46   1    0.412563    0.702546    0.413665    11.00000    0.01829    0.01243 =
         0.03232   -0.00121    0.00420   -0.00039
C421  1    0.356763    0.696459    0.254536    11.00000    0.03392    0.03552 =
         0.02979    0.00491    0.01644    0.00352
AFIX  13
H421  2    0.334929    0.720383    0.256157    11.00000   -1.20000
AFIX   0
C422  1    0.348897    0.598688    0.236686    11.00000    0.03233    0.03522 =
         0.02645    0.00197    0.01081   -0.00331
AFIX 137
H42A  2    0.370188    0.571797    0.236286    11.00000   -1.50000
H42B  2    0.328013    0.595558    0.199739    11.00000   -1.50000
H42C  2    0.343391    0.565313    0.262460    11.00000   -1.50000
AFIX   0
C423  1    0.361222    0.752837    0.212047    11.00000    0.05005    0.04241 =
         0.04621    0.01617    0.02601    0.01302
AFIX 137
H42D  2    0.366405    0.815766    0.224600    11.00000   -1.50000
H42E  2    0.338757    0.750339    0.176901    11.00000   -1.50000
H42F  2    0.381372    0.728697    0.207290    11.00000   -1.50000
AFIX   0
C461  1    0.405049    0.697787    0.461953    11.00000    0.03684    0.01899 =
         0.02354   -0.00240    0.00442   -0.00273
AFIX  13
H461  2    0.387067    0.648099    0.454529    11.00000   -1.20000
AFIX   0
C462  1    0.387889    0.786370    0.467472    11.00000    0.04627    0.03299 =
         0.03085   -0.00509    0.01487    0.00342
AFIX 137
H46A  2    0.404165    0.837041    0.471838    11.00000   -1.50000
H46B  2    0.384017    0.782912    0.499698    11.00000   -1.50000
H46C  2    0.364526    0.795718    0.434405    11.00000   -1.50000
AFIX   0
C463  1    0.439019    0.676349    0.516476    11.00000    0.05371    0.02665 =
         0.02828   -0.00190   -0.00298   -0.00075
AFIX 137
H46D  2    0.450859    0.622077    0.512077    11.00000   -1.50000
H46E  2    0.431975    0.665740    0.545111    11.00000   -1.50000
H46F  2    0.455913    0.727540    0.527058    11.00000   -1.50000
AFIX   0
C51   1    0.278174    0.517603    0.340098    11.00000    0.01214    0.01682 =
         0.02807    0.00479    0.00630    0.00115
C52   1    0.264001    0.454008    0.297227    11.00000    0.01225    0.01894 =
         0.02599    0.00540    0.00325    0.00109
C53   1    0.239010    0.391684    0.297535    11.00000    0.01863    0.02139 =
         0.03222    0.00447    0.00414   -0.00338
AFIX  43
H53   2    0.229415    0.346293    0.269923    11.00000   -1.20000
AFIX   0
C54   1    0.227992    0.394976    0.337434    11.00000    0.01764    0.02936 =
         0.04077    0.01127    0.00953   -0.00317
AFIX  43
H54   2    0.210916    0.351987    0.336830    11.00000   -1.20000
AFIX   0
C55   1    0.241567    0.460099    0.378087    11.00000    0.01967    0.03295 =
         0.03554    0.01115    0.01370    0.00351
AFIX  43
H55   2    0.233337    0.462122    0.404708    11.00000   -1.20000
AFIX   0
C56   1    0.267264    0.523143    0.380646    11.00000    0.01754    0.02407 =
         0.02912    0.00626    0.00898    0.00425
C521  1    0.273748    0.457046    0.250917    11.00000    0.01686    0.01993 =
         0.02496    0.00085    0.00453   -0.00132
AFIX  13
H521  2    0.300210    0.471685    0.267371    11.00000   -1.20000
AFIX   0
C522  1    0.267234    0.367448    0.219863    11.00000    0.02497    0.02670 =
         0.02889   -0.00545    0.00420   -0.00321
AFIX 137
H52A  2    0.278951    0.318172    0.246168    11.00000   -1.50000
H52B  2    0.277523    0.370901    0.194631    11.00000   -1.50000
H52C  2    0.241057    0.355893    0.198902    11.00000   -1.50000
AFIX   0
C523  1    0.252568    0.532346    0.210156    11.00000    0.02970    0.02919 =
         0.02995    0.00701    0.00928    0.00251
AFIX 137
H52D  2    0.226451    0.520283    0.193962    11.00000   -1.50000
H52E  2    0.259556    0.534365    0.181005    11.00000   -1.50000
H52F  2    0.258138    0.590593    0.229407    11.00000   -1.50000
AFIX   0
C561  1    0.282415    0.593606    0.426389    11.00000    0.02668    0.03069 =
         0.03402   -0.00045    0.01573    0.00287
PART 1
AFIX  13
H561  2    0.298247    0.635317    0.418614    31.00000   -1.20000
AFIX  13
PART 0
PART 2
H56A  2    0.286834    0.649535    0.410071   -31.00000   -1.20000
AFIX   0

PART 0
PART -1
C804  1    0.247190    0.167561    0.480276    10.50000    0.05290    0.08633 =
         0.03999    0.01237    0.01970   -0.01283
AFIX  23
H80A  2    0.271859    0.154840    0.485449    10.50000   -1.20000
H80B  2    0.243702    0.130481    0.507220    10.50000   -1.20000
AFIX   0
C801  1    0.271862    0.393679    0.563072    10.50000    0.25215    0.10083 =
         0.07965   -0.00630    0.07636   -0.03754
AFIX 137
H80C  2    0.269560    0.432624    0.532897    10.50000   -1.50000
H80D  2    0.293650    0.410765    0.596964    10.50000   -1.50000
H80E  2    0.250373    0.400930    0.568190    10.50000   -1.50000
AFIX   0

C705  1    0.452656    0.900099    0.240747    10.50000    0.04461    0.05811 =
         0.16769    0.01362    0.06876    0.00010
AFIX 137
H70A  2    0.464686    0.958927    0.252825    10.50000   -1.50000
H70B  2    0.435139    0.892011    0.254488    10.50000   -1.50000
H70C  2    0.439922    0.897668    0.200492    10.50000   -1.50000
AFIX   0
C704  1    0.480121    0.827284    0.262501    10.50000    0.10846    0.04895 =
         0.24130    0.06592    0.14003    0.02672
AFIX  23
H70D  2    0.467019    0.768891    0.250989    10.50000   -1.20000
H70E  2    0.491588    0.829686    0.303106    10.50000   -1.20000
AFIX   0
C703  1    0.510013    0.825036    0.247391    10.50000    0.09003    0.08526 =
         0.09064   -0.00601    0.06516    0.02630
AFIX  23
H70F  2    0.499739    0.829235    0.206994    10.50000   -1.20000
H70G  2    0.523649    0.767485    0.259832    10.50000   -1.20000
AFIX   0
C702  1    0.536065    0.907193    0.275817    10.50000    0.07535    0.05919 =
         0.04528    0.00996    0.03463    0.00753
AFIX  23
H70H  2    0.522053    0.963968    0.262015    10.50000   -1.20000
H70I  2    0.544572    0.904126    0.315856    10.50000   -1.20000
AFIX   0
C701  1    0.567638    0.911101    0.266865    10.50000    0.09512    0.06779 =
         0.08532    0.01368    0.06134    0.01573
AFIX 137
H70J  2    0.581376    0.854489    0.279363    10.50000   -1.50000
H70K  2    0.583167    0.961928    0.287598    10.50000   -1.50000
H70L  2    0.559623    0.919517    0.227608    10.50000   -1.50000
AFIX   0

C805  1    0.219778    0.138781    0.423284    10.50000    0.08333    0.10306 =
         0.06028   -0.00907    0.03579   -0.03802
AFIX 137
H80F  2    0.195221    0.151220    0.417620    10.50000   -1.50000
H80G  2    0.222366    0.073822    0.418862    10.50000   -1.50000
H80H  2    0.223881    0.172542    0.396226    10.50000   -1.50000
AFIX   0

PART 0
PART 1
C562  1    0.253240    0.650342    0.428718    31.00000    0.03843    0.05535 =
         0.04923   -0.01741    0.02158    0.00450
AFIX 137
H56B  2    0.239506    0.682384    0.393765    31.00000   -1.50000
H56C  2    0.264466    0.694399    0.458668    31.00000   -1.50000
H56D  2    0.236774    0.611139    0.435234    31.00000   -1.50000
AFIX   0
C563  1    0.306926    0.547342    0.483007    31.00000    0.06329    0.04330 =
         0.03187    0.00003   -0.00005   -0.00438
AFIX 137
H56E  2    0.292313    0.504716    0.491446    31.00000   -1.50000
H56F  2    0.317085    0.593617    0.511803    31.00000   -1.50000
H56G  2    0.326747    0.514687    0.481269    31.00000   -1.50000
AFIX   0
PART 0
PART 2
C62E  1    0.254939    0.619965    0.446534   -31.00000    0.04816    0.06288 =
         0.05253    0.00228    0.03541    0.01388
AFIX 137
H62D  2    0.231584    0.635561    0.414882   -31.00000   -1.50000
H62E  2    0.264216    0.672207    0.471217   -31.00000   -1.50000
H62F  2    0.251607    0.568832    0.466268   -31.00000   -1.50000
AFIX   0
C63E  1    0.317298    0.566774    0.470974   -31.00000    0.04145    0.04978 =
         0.03410   -0.00948    0.00850    0.01186
AFIX 137
H63D  2    0.314198    0.513201    0.489227   -31.00000   -1.50000
H63E  2    0.327367    0.616408    0.497531   -31.00000   -1.50000
H63F  2    0.333943    0.552547    0.456349   -31.00000   -1.50000
AFIX   0
PART 0
S1    6    0.446103    0.278710    0.439886    11.00000    0.01386    0.01580 =
         0.01839    0.00200    0.00678    0.00240
S2    6    0.399186    0.458815    0.471652    11.00000    0.01652    0.01438 =
         0.01612   -0.00151    0.00681   -0.00088
S3    6    0.350358    0.326264    0.345938    11.00000    0.01344    0.01670 =
         0.01471    0.00044    0.00434   -0.00217
S4    6    0.416285    0.481250    0.358300    11.00000    0.01524    0.01319 =
         0.01887    0.00117    0.00873   -0.00037

PART 4
C901  1    0.361071    0.104897    0.595133    41.00000    0.34454    0.17712 =
         0.12499   -0.03666    0.09426   -0.12425
AFIX 137
H90A  2    0.347602    0.155126    0.570803    41.00000   -1.50000
H90B  2    0.386461    0.122816    0.618180    41.00000   -1.50000
H90C  2    0.350177    0.089527    0.618573    41.00000   -1.50000
AFIX   0
C902  1    0.359701    0.034410    0.565544    41.00000    0.21296    0.17689 =
         0.08479   -0.00927    0.09029   -0.07678
AFIX  23
H90D  2    0.370147   -0.015483    0.592494    41.00000   -1.20000
H90E  2    0.377860    0.047451    0.553125    41.00000   -1.20000
AFIX   0
C903  1    0.331555   -0.004142    0.521328    41.00000    0.26167    0.11376 =
         0.06012    0.01825    0.02964   -0.05477
AFIX  23
H90F  2    0.311873    0.037563    0.517132    41.00000   -1.20000
H90G  2    0.337592    0.015341    0.492375    41.00000   -1.20000
AFIX   0
C904  1    0.313425   -0.070762    0.498974    41.00000    0.17147    0.16487 =
         0.19429    0.02368    0.05404   -0.05297
AFIX  23
H90H  2    0.302621   -0.083187    0.523309    41.00000   -1.20000
H90I  2    0.332818   -0.116775    0.509544    41.00000   -1.20000
AFIX   0
C905  1    0.287553   -0.106739    0.451111    41.00000    0.18113    0.14298 =
         0.13899   -0.00685    0.07170    0.00477
AFIX 137
H90J  2    0.276293   -0.058469    0.423876    41.00000   -1.50000
H90K  2    0.268966   -0.136579    0.457491    41.00000   -1.50000
H90L  2    0.298725   -0.151137    0.437418    41.00000   -1.50000
AFIX   0
PART 0
PART 5
C91A  1    0.357136    0.103274    0.590089   -41.00000    0.05338    0.06394 =
         0.04089    0.02775    0.01187   -0.01116
AFIX 137
H91A  2    0.347228    0.138456    0.555970   -41.00000   -1.50000
H91B  2    0.375007    0.139916    0.620467   -41.00000   -1.50000
H91C  2    0.337398    0.086155    0.597857   -41.00000   -1.50000
AFIX   0
C92A  1    0.375729    0.016895    0.583732   -41.00000    0.08775    0.09864 =
         0.05052    0.00582    0.04720   -0.00384
AFIX  23
H92A  2    0.392787   -0.006772    0.620627   -41.00000   -1.20000
H92B  2    0.389985    0.032551    0.564802   -41.00000   -1.20000
AFIX   0
C93A  1    0.347276   -0.059021    0.550056   -41.00000    0.14530    0.07675 =
         0.08038    0.00857    0.06987   -0.01526
AFIX  23
H93A  2    0.360034   -0.118008    0.559691   -41.00000   -1.20000
H93B  2    0.328706   -0.060689    0.562589   -41.00000   -1.20000
AFIX   0
C94A  1    0.328298   -0.050874    0.489778   -41.00000    0.09690    0.10270 =
         0.07140    0.00216    0.06384   -0.00614
AFIX  23
H94A  2    0.346996   -0.058120    0.477779   -41.00000   -1.20000
H94B  2    0.319572    0.012379    0.481329   -41.00000   -1.20000
AFIX   0
C95A  1    0.296641   -0.110570    0.452589   -41.00000    0.06645    0.07400 =
         0.16269   -0.03733    0.07444   -0.01912
AFIX 137
H95A  2    0.298638   -0.126022    0.419667   -41.00000   -1.50000
H95B  2    0.273793   -0.078188    0.441831   -41.00000   -1.50000
H95C  2    0.297010   -0.166127    0.472206   -41.00000   -1.50000
AFIX   0

PART 0
PART -1
C802  1    0.274988    0.294925    0.549287    10.50000    0.06548    0.10230 =
         0.03742    0.01589    0.01877   -0.01772
AFIX  23
H80I  2    0.298896    0.285639    0.550830    10.50000   -1.20000
H80J  2    0.273940    0.255409    0.577408    10.50000   -1.20000
AFIX   0
C803  1    0.244996    0.266943    0.492536    10.50000    0.04479    0.08527 =
         0.03876    0.01988    0.02595    0.00261
AFIX  23
H80K  2    0.221054    0.279019    0.490321    10.50000   -1.20000
H80L  2    0.246812    0.304316    0.464229    10.50000   -1.20000
AFIX   0
HKLF 4


REM  vor in C2/c
REM R1 =  0.0340 for   20518 Fo > 4sig(Fo)  and  0.0459 for all   25148 data
REM    946 parameters refined using   1542 restraints

END

WGHT      0.0360     18.2137

REM Highest difference peak  1.218,  deepest hole -0.691,  1-sigma level  0.079
Q1    1   0.5000  0.7800  0.2500  10.50000  0.05    1.22
Q2    1   0.3782  0.6834  0.2662  11.00000  0.05    1.15
Q3    1   0.3561  0.7777  0.2394  11.00000  0.05    0.98
Q4    1   0.4365  0.7110  0.3495  11.00000  0.05    0.84
Q5    1   0.3494 -0.0196  0.5205  11.00000  0.05    0.81
Q6    1   0.3166 -0.0590  0.5209  11.00000  0.05    0.65
Q7    1   0.4884  0.8628  0.2886  11.00000  0.05    0.64
Q8    1   0.4074  0.6949  0.3296  11.00000  0.05    0.55
;
_shelx_res_checksum                77879
_shelx_hkl_file
;
   4   0   0 7320.51 276.143   2
   4   0   0 6016.56 275.999   4
   4   0   0 7081.84 276.021   8
   4   0   0 6194.66 276.008   9
  -4   0   0 5787.46 276.003   8
  -4   0   0 6666.85 276.004   9
  -4   0   0 5940.26 275.997   6
  -4   0   0 6914.70 276.011   7
  -4   0   0 7296.98 276.138   2
  -4   0   0 6223.16 275.988   3
  -4   0   0 5421.88 275.991   4
  -6   0   0 5502.26 250.774   2
   6   0   0 5678.14 250.569   3
   6   0   0 5349.16 250.768   2
   6   0   0 6015.42 250.774   2
   6   0   0 5486.84 250.599   9
  -6   0   0 5731.03 250.593   7
  -6   0   0 6932.82 250.616   9
   6   0   0 6093.59 250.613   8
  -6   0   0 5840.94 250.576   3
  -8   0   0 697.105 31.0238   8
  -8   0   0 735.634 31.0187   9
  -8   0   0 718.511 31.0177   7
   8   0   0 715.013 31.0191   7
   8   0   0 728.788 31.0356   8
   8   0   0 722.732 31.0372   9
  -8   0   0 708.324 31.0173   4
   8   0   0 752.184 31.2756   2
   8   0   0 669.034 30.9928   3
   8   0   0 734.155 31.0254   4
  -8   0   0 725.694 30.9933   3
   8   0   0 727.405 31.0195   6
  -8   0   0 725.239 31.0165   6
  10   0   0 100.694 4.44295   3
 -10   0   0 95.9825 4.88434   2
 -10   0   0 96.8865 4.46148   3
 -10   0   0 100.441 4.50709   6
  10   0   0 103.671 4.98867   2
  10   0   0 98.9996 4.51239   4
 -10   0   0 96.7862 4.49962   9
  10   0   0 97.3788 4.53930   9
  10   0   0 100.620 4.50086   6
  10   0   0 95.3815 4.50196   7
  10   0   0 99.3423 4.53171   8
 -10   0   0 97.6802 4.50859   7
 -12   0   0 14.6135 1.15980   3
 -12   0   0 11.7064 1.13663   4
 -12   0   0 14.9614 2.63004   2
  12   0   0 13.0774 1.26177   4
  12   0   0 14.2739 1.21506   7
  12   0   0 13.7093 1.28401   8
 -12   0   0 12.8938 1.28405   7
 -12   0   0 15.4903 1.19960   8
  12   0   0 14.6923 1.17622   6
  12   0   0 13.9508 2.22269   2
  12   0   0 13.9927 3.38815   2
  12   0   0 14.5581 1.04960   3
  12   0   0 13.1986 1.31497   9
  14   0   0 0.91029 0.64762   9
  14   0   0 2.33387 1.47937   2
  14   0   0 4.70893 0.90767   3
 -14   0   0 1.89862 0.70532   7
  14   0   0 1.34847 0.69809   4
  14   0   0 0.94318 1.26241   2
 -14   0   0 1.82921 0.69398   8
 -14   0   0 1.07376 0.62159   9
 -14   0   0 1.99441 0.75191   6
  14   0   0 4.62179 1.08786   7
 -14   0   0 2.45528 0.67376   3
 -14   0   0 2.08915 1.61418   2
 -14   0   0 1.38705 1.17814   2
  14   0   0 0.54643 0.67987   9
  14   0   0 1.84661 0.61587   6
  14   0   0 2.13435 0.76381   8
 -14   0   0 1.63703 0.61413   4
  16   0   0 191.768 8.23822   9
  16   0   0 188.850 8.28626   8
  16   0   0 164.589 8.94485   2
  16   0   0 188.862 8.23551   4
 -16   0   0 196.846 8.23188   4
 -16   0   0 153.687 9.35075   2
 -16   0   0 172.931 8.14622   3
 -16   0   0 164.299 8.33119   9
 -16   0   0 187.465 8.21353   9
  16   0   0 189.073 8.22326   6
 -16   0   0 184.897 9.26468   2
  16   0   0 181.472 8.10013   3
 -16   0   0 187.817 8.23731   6
  16   0   0 172.586 8.56411   9
 -16   0   0 175.916 8.21649   8
 -16   0   0 191.592 8.25831   7
  18   0   0 1012.47 44.7651   2
 -18   0   0 1050.67 44.1007   7
 -18   0   0 1024.95 44.1143   8
 -18   0   0 1043.51 44.1323   9
  18   0   0 1041.51 44.0940   9
  18   0   0 1055.72 44.1434   8
 -18   0   0 941.499 44.7527   9
  18   0   0 1037.58 44.1041   4
 -18   0   0 1018.34 44.0875   4
 -18   0   0 1020.83 44.6247   2
  18   0   0 1055.70 44.7179   2
  18   0   0 991.274 44.0746   6
 -18   0   0 1021.12 44.0871   6
  18   0   0 1023.93 44.1347   9
 -18   0   0 959.687 44.0780   3
  18   0   0 1005.71 43.9785   3
  20   0   0 1300.70 56.5183   2
 -20   0   0 1278.34 55.7363   6
 -20   0   0 1302.20 55.7526   4
  20   0   0 1294.43 55.6240   3
 -20   0   0 1295.21 55.7496   7
 -20   0   0 1233.15 55.7420   8
 -20   0   0 1333.56 55.7954   9
 -20   0   0 1273.18 55.7221   9
  20   0   0 1294.63 55.7425   9
  20   0   0 1292.35 56.4126   2
 -20   0   0 1323.31 56.6236   2
 -20   0   0 1295.62 55.6815   3
  20   0   0 1283.92 55.7860   8
  20   0   0 1300.56 55.7956   9
  20   0   0 1290.59 55.7583   4
  20   0   0 1249.50 55.7320   6
  22   0   0 73.3108 4.28813   8
 -22   0   0 65.3151 4.18160   6
  22   0   0 69.6519 5.81611   2
  22   0   0 74.9060 4.20854   4
 -22   0   0 76.7477 3.99184   4
 -22   0   0 64.5151 6.90022   2
 -22   0   0 69.6462 5.45153   2
  22   0   0 67.7354 5.93457   2
  22   0   0 75.9296 4.00114   6
  22   0   0 78.9209 4.25717   9
  22   0   0 71.4746 3.73172   3
 -22   0   0 72.8775 4.02742   3
 -22   0   0 75.3072 4.23168   9
 -22   0   0 63.0207 3.92253   8
 -22   0   0 66.7597 4.18885   7
 -22   0   0 73.2080 4.04910   9
  24   0   0 622.990 27.8475   6
  24   0   0 669.439 27.8935   9
 -24   0   0 630.596 27.7877   3
 -24   0   0 648.043 27.8594   4
 -24   0   0 633.210 27.8980   7
 -24   0   0 635.566 27.8876   6
 -24   0   0 621.872 27.8659   8
 -24   0   0 671.380 28.2188   9
 -24   0   0 635.502 28.6989   2
 -24   0   0 591.478 28.0023   9
  24   0   0 655.042 27.9684   8
  24   0   0 598.448 28.8714   2
  24   0   0 636.885 27.6783   3
  24   0   0 641.372 27.9053   4
  24   0   0 633.968 27.9572   9
 -26   0   0 154.293 7.47143   9
 -26   0   0 142.726 8.74050   2
  26   0   0 147.353 6.92621   3
  26   0   0 142.282 7.45285   4
 -26   0   0 129.583 7.42075   6
  26   0   0 139.024 7.41294   9
 -26   0   0 139.703 7.14185   4
  26   0   0 181.261 10.7002   2
 -26   0   0 142.862 7.49776   7
  26   0   0 152.510 7.32905   9
  26   0   0 138.001 9.64162   2
 -26   0   0 161.373 10.6809   2
  26   0   0 149.916 7.55413   8
 -26   0   0 147.085 7.27456   3
 -26   0   0 138.985 7.23930   9
 -26   0   0 138.121 7.16845   8
  26   0   0 146.425 7.22337   6
  28   0   0 291.685 14.9706   2
  28   0   0 292.927 12.8225   3
  28   0   0 287.782 13.2877   9
 -28   0   0 277.969 13.3107   7
  28   0   0 277.273 13.2537   4
 -28   0   0 276.148 13.1043   3
 -28   0   0 291.145 13.1059   4
 -28   0   0 292.263 13.2710   9
  28   0   0 278.868 13.0647   6
  28   0   0 288.121 13.3796   8
 -28   0   0 268.236 13.0564   9
 -28   0   0 288.176 13.3371   6
 -28   0   0 278.809 13.0772   8
 -30   0   0 93.0121 7.94488   2
  30   0   0 100.535 6.42119   8
 -30   0   0 95.0964 6.44901   7
 -30   0   0 85.5807 7.07762   9
  30   0   0 97.9922 8.58618   2
  30   0   0 97.5683 10.3918   2
  30   0   0 89.8648 5.09926   3
 -30   0   0 98.4939 6.00071   3
  30   0   0 102.201 5.87964   9
  30   0   0 91.6926 6.29115   4
 -30   0   0 85.8536 5.63278   9
 -30   0   0 106.084 6.38175   6
 -30   0   0 99.1370 12.3055   2
  30   0   0 89.8777 5.57161   6
 -30   0   0 92.0808 5.52466   4
 -30   0   0 102.602 5.56692   8
  30   0   0 97.5907 6.05670   9
 -32   0   0 3.23165 2.03505   9
  32   0   0 9.74971 2.45114   9
  32   0   0 4.66214 4.40555   2
 -32   0   0 6.89407 1.99625   8
  32   0   0 6.64276 1.62683   3
 -32   0   0 -0.5445 6.21924   2
 -32   0   0 8.56604 2.08007   4
  32   0   0 3.81693 6.06329   2
 -32   0   0 5.89719 3.81585   2
  32   0   0 4.55499 1.96463   6
 -32   0   0 3.33466 2.34293   9
  32   0   0 3.65310 2.17609   9
  34   0   0 32.3589 7.83615   2
  34   0   0 49.0195 8.96533   2
  34   0   0 43.8571 3.51783   3
 -34   0   0 34.2937 8.21657   2
  34   0   0 34.3207 4.20238   6
  34   0   0 29.2831 5.17260   9
  34   0   0 37.0541 4.83331   9
 -34   0   0 30.9733 5.20856   9
 -34   0   0 31.4652 4.57732   9
 -34   0   0 34.8044 4.19121   4
 -34   0   0 38.1222 4.11147   8
 -34   0   0 37.0009 7.91580   2
 -36   0   0 2.88884 2.29862   8
 -36   0   0 4.20935 2.57080   9
 -36   0   0 -2.1849 4.82082   2
  36   0   0 3.23112 2.70315   9
 -36   0   0 -0.6371 2.89015   9
  36   0   0 0.84793 2.80544   9
  36   0   0 2.00789 1.82281   3
  36   0   0 6.85335 9.69910   2
  36   0   0 5.09830 2.34285   6
  36   0   0 6.66951 5.17795   2
  38   0   0 63.1654 6.48489   9
  38   0   0 81.7794 14.5932   2
 -38   0   0 59.6943 5.52899   8
  38   0   0 73.5758 5.79258   6
 -38   0   0 55.6834 6.84687   9
 -38   0   0 62.6444 10.1063   2
  38   0   0 56.2229 6.98203   9
  38   0   0 56.6085 4.73187   3
 -38   0   0 55.0378 6.24590   9
  40   0   0 5.31395 3.50846   9
  40   0   0 10.5471 2.50571   3
  40   0   0 16.9733 5.00903   6
  40   0   0 5.08962 5.88990   2
 -40   0   0 10.7883 3.71475   8
 -40   0   0 5.18314 3.30360   9
 -40   0   0 7.84578 10.7839   2
  40   0   0 9.55345 3.90081   9
 -40   0   0 11.7759 3.95800   9
  42   0   0 237.857 13.8611   9
 -42   0   0 249.629 12.6658   8
 -42   0   0 235.055 13.1408   9
 -42   0   0 251.331 17.1348   2
  42   0   0 264.682 11.9488   3
 -42   0   0 234.581 13.8469   9
  42   0   0 228.807 18.4670   2
  42   0   0 217.709 13.2354   9
  42   0   0 234.311 12.7466   6
  44   0   0 177.136 11.0818   6
 -44   0   0 197.353 10.8923   8
  44   0   0 180.848 12.4070   9
  44   0   0 165.136 18.5091   2
 -44   0   0 175.765 11.8786   9
 -44   0   0 179.014 16.7825   2
  44   0   0 184.747 9.89210   3
  44   0   0 181.899 11.9977   9
 -46   0   0 4.69751 5.64282   9
 -46   0   0 15.6922 4.56491   8
  46   0   0 15.1353 9.82347   2
  46   0   0 13.7186 3.40080   3
 -46   0   0 14.3331 4.87159   9
  46   0   0 3.94155 5.51144   9
 -46   0   0 11.5370 9.12982   2
  46   0   0 8.80633 5.65521   9
  46   0   0 10.3026 4.36505   6
  48   0   0 3.59437 5.94142   9
 -48   0   0 0.91604 4.56669   8
  48   0   0 -0.3036 4.60551   3
  48   0   0 2.70930 4.75869   6
  48   0   0 12.6168 10.8635   2
 -48   0   0 -2.1646 5.30515   9
 -48   0   0 -11.734 9.38485   2
  48   0   0 -1.2631 5.60293   9
  50   0   0 113.392 11.2978   6
  50   0   0 144.501 23.6755   2
 -50   0   0 96.0483 20.5551   2
 -50   0   0 106.568 12.5424   9
  50   0   0 119.910 8.98547   3
  50   0   0 99.7009 14.0268   9
 -50   0   0 113.291 10.7355   8
  52   0   0 2.59805 7.48549   9
  52   0   0 5.33329 6.20474   6
 -52   0   0 4.99254 6.91185   9
 -52   0   0 -5.3916 12.4015   2
 -52   0   0 5.28478 6.06486   8
  52   0   0 8.73756 14.5927   2
  52   0   0 1.39411 7.55801   9
  52   0   0 8.08336 4.78558   3
 -52   0   0 -3.1255 8.41468   9
 -54   0   0 200.683 15.3963   8
  54   0   0 199.263 19.0486   9
  54   0   0 203.279 13.3677   3
  54   0   0 211.945 15.9405   6
  54   0   0 173.398 32.6027   2
 -54   0   0 204.557 17.0289   9
 -54   0   0 213.620 31.9132   2
  -1  -1   0 3517.47 147.002   2
  -1  -1   0 3577.89 146.983   2
  -1  -1   0 3576.77 146.987   8
   1   1   0 3144.18 147.001   2
  -1   1   0 3300.22 146.979   4
   1   1   0 3466.65 146.977   7
  -3  -1   0 390.560 15.3915   2
   3  -1   0 352.917 15.2986   4
   3  -1   0 346.096 15.3163   6
   3  -1   0 379.032 15.4037   2
  -3  -1   0 306.576 15.3395   9
   3  -1   0 330.040 15.3094   9
  -3  -1   0 346.561 15.2875   7
  -3  -1   0 346.130 15.3221   3
  -3  -1   0 348.217 15.3180   8
  -3   1   0 354.104 15.3152   6
  -3   1   0 361.979 15.3756   2
   3   1   0 378.555 15.4088   2
   3   1   0 355.482 15.3815   2
   3   1   0 363.186 15.3208   8
   3   1   0 357.495 15.2808   9
   3   1   0 350.685 15.3215   3
  -3   1   0 385.146 15.4069   2
  -3   1   0 352.685 15.2893   9
  -3   1   0 351.142 15.2508   3
  -3   1   0 329.704 15.3046   4
   3   1   0 366.023 15.2897   7
   3   1   0 368.961 15.2882   9
  -3   1   0 354.296 15.2802   9
  -5  -1   0 874.229 37.8975   6
  -5  -1   0 832.906 37.9508   8
  -5  -1   0 880.512 37.9311   3
   5  -1   0 876.468 37.9055   4
  -5  -1   0 878.822 38.0442   2
   5  -1   0 836.301 37.9425   6
   5  -1   0 883.730 37.9073   8
   5  -1   0 875.669 37.9111   9
  -5  -1   0 799.091 37.9325   4
   5  -1   0 874.867 37.8474   3
   5  -1   0 887.307 38.0735   2
  -5  -1   0 839.858 37.9728   9
  -5  -1   0 877.469 37.8945   7
  -5  -1   0 850.665 37.9015   9
  -5   1   0 882.702 37.8496   3
   5   1   0 875.165 37.9306   8
  -5   1   0 980.998 38.1041   2
  -5   1   0 903.899 38.0470   2
  -5   1   0 895.882 37.9133   9
  -5   1   0 899.750 37.9008   9
   5   1   0 874.532 37.8942   6
   5   1   0 972.228 38.1064   2
   5   1   0 886.738 37.9228   4
   5   1   0 904.683 37.9129   9
   5   1   0 869.057 37.9296   3
  -5   1   0 866.594 37.9019   8
   5   1   0 870.962 37.8931   7
  -5   1   0 878.163 37.9239   6
  -5   1   0 888.589 37.9045   4
   5   1   0 898.129 37.8994   9
   5   1   0 939.199 38.0681   2
   7  -1   0 747.012 31.8451   9
   7  -1   0 694.623 31.9030   9
   7  -1   0 772.238 32.0479   2
  -7  -1   0 715.737 31.8466   4
  -7  -1   0 744.922 31.8209   9
   7  -1   0 745.929 31.8368   8
  -7  -1   0 737.112 31.8185   7
  -7  -1   0 722.317 31.8573   8
   7  -1   0 743.607 31.7615   3
  -7  -1   0 785.319 32.1027   2
   7  -1   0 716.969 31.8490   6
  -7  -1   0 737.562 31.8502   3
   7  -1   0 735.348 31.8301   4
  -7  -1   0 732.176 31.8201   6
  -7  -1   0 643.455 32.0835   9
  -7  -1   0 749.325 32.0267   2
   7   1   0 706.617 32.0566   2
  -7   1   0 755.185 32.0257   2
   7   1   0 733.710 31.8404   9
   7   1   0 794.501 32.0675   2
   7   1   0 739.773 31.8184   6
   7   1   0 714.809 31.8141   7
  -7   1   0 767.760 31.8315   9
  -7   1   0 735.993 31.8242   4
  -7   1   0 783.971 32.1011   2
  -7   1   0 732.669 31.7648   3
  -7   1   0 752.580 31.8343   8
  -7   1   0 765.529 31.8495   9
   7   1   0 731.726 31.8585   8
  -7   1   0 742.088 31.8547   7
   7   1   0 738.814 31.8243   9
  -7   1   0 740.390 31.8481   6
   7   1   0 750.565 31.8473   3
   7   1   0 731.908 31.8443   4
   9  -1   0 565.024 26.1896   3
   9  -1   0 619.995 26.2732   4
  -9  -1   0 595.651 26.2500   7
  -9  -1   0 638.180 26.6251   2
  -9  -1   0 580.537 26.2737   4
  -9  -1   0 603.840 26.2793   3
  -9  -1   0 588.545 26.2916   8
   9  -1   0 638.714 26.5652   2
   9  -1   0 601.432 26.2874   6
   9  -1   0 604.457 26.2814   9
  -9  -1   0 615.459 26.2598   6
   9  -1   0 611.637 26.2690   9
   9  -1   0 620.765 26.2773   8
  -9  -1   0 598.835 26.2524   9
   9   1   0 611.277 26.2827   4
   9   1   0 600.269 26.6091   2
  -9   1   0 619.452 26.1966   3
  -9   1   0 605.136 26.2871   7
  -9   1   0 620.572 26.5232   2
   9   1   0 605.996 26.2979   8
   9   1   0 666.138 26.6237   2
  -9   1   0 611.482 26.2619   4
  -9   1   0 600.230 26.2772   6
   9   1   0 590.033 26.2453   7
  -9   1   0 599.201 26.2624   8
   9   1   0 623.868 26.2670   9
  -9   1   0 622.891 26.2911   9
  -9   1   0 596.460 26.5955   2
   9   1   0 595.555 26.2461   6
  -9   1   0 618.441 26.2642   9
   9   1   0 595.887 26.2811   9
   9   1   0 604.649 26.2675   3
 -11  -1   0 63.9065 3.40949   9
  11  -1   0 69.0654 3.21567   9
 -11  -1   0 67.8604 3.22830   3
  11  -1   0 68.1222 3.81147   2
 -11  -1   0 62.6136 3.66562   2
 -11  -1   0 69.8218 3.20213   9
  11  -1   0 60.1820 3.20883   6
  11  -1   0 67.9735 3.23544   8
 -11  -1   0 67.4328 3.20626   7
 -11  -1   0 63.9184 3.20987   4
  11  -1   0 67.7800 3.07397   3
  11  -1   0 72.1988 3.83193   2
 -11  -1   0 66.3880 3.20622   6
  11  -1   0 70.6764 3.26318   9
  11   1   0 67.8816 3.26740   8
 -11   1   0 66.6849 3.10186   3
  11   1   0 67.5380 3.24022   4
  11   1   0 64.6303 3.18165   6
  11   1   0 60.2924 3.15909   3
  11   1   0 73.2172 3.90011   2
 -11   1   0 65.3399 3.18383   4
 -11   1   0 67.0670 3.22756   6
  11   1   0 74.0908 3.25730   9
 -11   1   0 66.2412 3.22026   9
 -11   1   0 72.0207 3.29565   9
 -11   1   0 68.3327 3.26143   7
  11   1   0 61.5774 3.17178   7
  11   1   0 66.5047 3.26745   9
 -11   1   0 63.3053 3.18576   8
 -13  -1   0 2.32794 0.67443   6
 -13  -1   0 1.70444 0.55487   9
  13  -1   0 2.81383 0.70352   4
  13  -1   0 4.90963 1.14667   9
 -13  -1   0 1.48590 0.63901   9
 -13  -1   0 1.82231 1.45818   2
  13  -1   0 2.15668 0.59654   9
  13  -1   0 2.91619 1.67528   2
  13  -1   0 2.02598 0.47100   3
  13  -1   0 2.63440 1.29871   2
 -13  -1   0 3.18909 0.70344   7
 -13  -1   0 3.16884 0.71620   8
  13  -1   0 2.20185 0.65496   6
 -13  -1   0 5.03048 1.61701   2
 -13  -1   0 1.87442 0.59830   4
 -13  -1   0 2.06908 0.66878   3
  13  -1   0 2.50972 0.65917   8
  13   1   0 2.11579 0.64097   7
  13   1   0 2.38111 0.69583   4
  13   1   0 4.68935 0.92162   3
  13   1   0 2.68977 0.67136   9
  13   1   0 4.61839 1.76653   2
 -13   1   0 1.89545 0.70467   7
  13   1   0 2.98994 0.73475   8
  13   1   0 1.18030 0.57834   6
 -13   1   0 1.73506 0.55285   3
  13   1   0 2.39445 0.70760   9
 -13   1   0 3.50630 0.73578   9
 -13   1   0 1.64121 0.55170   4
 -13   1   0 2.65990 0.62322   8
 -13   1   0 2.90997 1.08243   2
  13   1   0 3.12722 1.37678   2
 -13   1   0 4.35934 1.17329   6
 -13   1   0 2.00980 0.63508   9
 -13   1   0 5.57708 1.57541   2
  15  -1   0 49.2059 3.63082   2
 -15  -1   0 44.3641 3.42005   2
  15  -1   0 51.6438 3.15462   9
  15  -1   0 48.0998 2.63045   6
  15  -1   0 46.3499 2.66404   4
 -15  -1   0 48.3343 2.69788   7
 -15  -1   0 42.0499 6.24714   2
 -15  -1   0 44.5542 2.69834   9
  15  -1   0 41.2911 3.45289   8
 -15  -1   0 51.2726 2.69118   3
 -15  -1   0 51.0440 2.64052   4
 -15  -1   0 41.6840 3.58115   6
  15  -1   0 46.0400 2.39785   3
  15  -1   0 52.3780 2.67353   9
 -15  -1   0 44.5559 2.64258   9
 -15  -1   0 45.4164 2.62598   8
 -15   1   0 48.0218 2.80629   9
  15   1   0 46.8417 2.53486   3
 -15   1   0 51.1029 2.51151   3
  15   1   0 44.1055 3.62435   2
 -15   1   0 47.7412 2.74872   7
 -15   1   0 46.3774 2.65312   9
  15   1   0 48.4253 2.77119   9
  15   1   0 51.1344 2.75439   8
 -15   1   0 50.2345 4.26220   2
  15   1   0 47.6069 2.69077   4
  15   1   0 50.2458 3.76739   2
 -15   1   0 53.3931 2.73174   6
  15   1   0 48.3940 2.68200   9
  15   1   0 41.8744 2.56072   7
  15   1   0 48.4406 2.58532   6
 -15   1   0 52.3514 3.52708   2
 -15   1   0 42.3269 2.54463   8
 -15   1   0 48.9829 2.60298   4
 -17  -1   0 7.57240 1.34092   4
 -17  -1   0 4.08532 1.46643   2
 -17  -1   0 3.29297 0.93570   6
 -17  -1   0 6.16264 2.14484   2
 -17  -1   0 7.06150 1.65792   9
  17  -1   0 3.87249 0.90411   9
  17  -1   0 6.76138 1.12552   8
  17  -1   0 3.50454 0.93375   9
  17  -1   0 5.94564 1.06636   3
  17  -1   0 8.12512 2.30531   2
  17  -1   0 3.71594 1.54704   2
 -17  -1   0 6.01661 1.35959   8
  17  -1   0 4.51898 0.97822   6
 -17  -1   0 3.77333 1.03122   7
 -17  -1   0 5.75956 1.53425   3
  17  -1   0 6.26477 1.55564   4
 -17  -1   0 4.48208 0.97629   9
  17   1   0 4.74763 1.00675   4
 -17   1   0 4.22074 2.12285   2
  17   1   0 6.82058 1.38989   7
  17   1   0 8.09477 1.54487   9
 -17   1   0 6.47031 1.35425   4
 -17   1   0 7.02607 1.34511   8
 -17   1   0 3.68173 0.92621   9
  17   1   0 6.53487 1.64651   8
 -17   1   0 5.57341 1.07816   9
  17   1   0 9.09851 1.69252   9
 -17   1   0 6.17524 1.69722   7
  17   1   0 5.60813 1.32584   6
 -17   1   0 6.57335 1.65549   6
  17   1   0 6.19763 1.24978   3
  17   1   0 5.42253 2.12227   2
 -17   1   0 6.01291 1.52764   2
  17   1   0 5.77549 1.79727   2
 -17   1   0 6.35643 1.29928   3
 -19  -1   0 44.4682 2.82706   9
 -19  -1   0 53.4059 5.19402   2
  19  -1   0 51.3785 3.04005   8
 -19  -1   0 50.0544 3.01785   6
 -19  -1   0 48.3151 2.96327   3
  19  -1   0 48.7184 2.54781   3
 -19  -1   0 50.3795 3.00683   7
 -19  -1   0 48.5286 3.00615   9
  19  -1   0 49.9911 2.98243   4
  19  -1   0 46.9794 3.82500   9
 -19  -1   0 47.0671 4.04592   2
  19  -1   0 48.5570 4.46683   2
 -19  -1   0 46.2433 2.85086   8
  19  -1   0 44.4502 2.99915   9
 -19  -1   0 46.8571 2.82778   4
  19  -1   0 41.3690 2.84578   6
  19  -1   0 41.1595 4.27779   2
  19   1   0 46.4290 3.06116   8
  19   1   0 54.0738 4.52200   2
 -19   1   0 44.7374 3.08019   9
 -19   1   0 46.6898 3.01302   6
 -19   1   0 46.2022 5.31022   2
 -19   1   0 49.4878 2.75920   3
 -19   1   0 43.3050 2.76601   8
 -19   1   0 52.2015 3.11336   7
 -19   1   0 47.5412 2.94201   9
  19   1   0 43.7012 2.83153   7
  19   1   0 49.0245 3.05027   9
  19   1   0 43.9160 2.97449   4
  19   1   0 46.5372 4.44115   2
 -19   1   0 42.7012 2.78323   4
  19   1   0 48.7184 2.70675   3
 -19   1   0 42.6158 6.07236   2
  19   1   0 44.2550 2.77918   6
 -21  -1   0 27.9702 2.61831   7
  21  -1   0 26.6440 2.62872   4
 -21  -1   0 25.1894 3.79934   2
 -21  -1   0 23.1072 2.27500   9
  21  -1   0 30.7497 6.28703   2
  21  -1   0 22.7395 2.52247   9
  21  -1   0 23.7091 2.32665   9
  21  -1   0 27.3566 2.27642   6
 -21  -1   0 28.6691 2.51342   3
 -21  -1   0 24.0760 2.20686   8
  21  -1   0 23.3743 2.58159   8
 -21  -1   0 30.9080 5.37860   2
 -21  -1   0 26.3715 2.55922   6
 -21  -1   0 21.3025 2.23032   4
  21  -1   0 22.1694 4.05189   2
  21  -1   0 26.5778 1.87682   3
 -21  -1   0 25.4042 2.67522   9
 -21   1   0 24.7468 2.21906   3
 -21   1   0 25.8124 2.58045   6
 -21   1   0 17.6115 2.65875   7
  21   1   0 22.8110 2.61209   8
  21   1   0 24.5602 2.56641   9
  21   1   0 26.3279 2.24944   6
  21   1   0 27.5730 2.53046   4
 -21   1   0 27.6910 2.19941   4
 -21   1   0 24.5076 3.87819   2
 -21   1   0 22.0061 2.38517   9
  21   1   0 32.3946 4.45351   2
 -21   1   0 17.3085 2.62870   9
  21   1   0 29.6021 2.06971   3
 -21   1   0 20.8928 5.42134   2
 -21   1   0 23.1236 2.14801   8
  23  -1   0 -1.8319 2.90098   2
  23  -1   0 0.28313 1.25592   9
 -23  -1   0 1.08229 2.16361   8
  23  -1   0 -0.0660 1.37058   8
 -23  -1   0 0.92258 1.36312   9
 -23  -1   0 2.43666 2.28709   2
  23  -1   0 0.43003 0.85956   3
  23  -1   0 1.33450 2.07698   6
 -23  -1   0 -0.1289 1.16298   4
 -23  -1   0 1.35430 1.40424   6
  23  -1   0 1.46478 1.22393   9
  23  -1   0 0.92199 3.29872   2
 -23  -1   0 1.57792 1.56721   7
 -23  -1   0 3.26562 3.26615   2
  23  -1   0 1.20105 1.51543   4
 -23  -1   0 2.23198 1.39828   3
 -23  -1   0 0.70194 1.11151   9
 -23   1   0 0.22112 1.14414   3
  23   1   0 1.78996 3.19065   2
 -23   1   0 -0.4241 1.12369   9
 -23   1   0 0.88620 1.10135   8
  23   1   0 0.09699 0.97081   3
 -23   1   0 -1.1665 2.77541   2
  23   1   0 -1.1322 3.08579   2
 -23   1   0 0.16065 1.08628   4
 -23   1   0 -1.0699 1.41941   7
  23   1   0 -1.9818 1.43967   8
  23   1   0 0.19356 1.29643   9
 -23   1   0 2.31169 4.64628   2
 -23   1   0 -0.0929 1.46747   6
  23   1   0 0.48288 1.01565   6
  23   1   0 0.31487 1.47694   4
  25  -1   0 79.0663 4.42346   6
 -25  -1   0 74.8837 4.59634   3
 -25  -1   0 79.0044 4.34380   4
  25  -1   0 75.5693 6.51777   2
 -25  -1   0 83.3333 4.80197   7
 -25  -1   0 76.9840 4.35627   8
  25  -1   0 74.0430 4.71850   4
 -25  -1   0 72.7555 4.71855   6
  25  -1   0 78.3391 4.68257   9
 -25  -1   0 66.1073 8.00317   2
  25  -1   0 79.2689 7.01574   2
 -25  -1   0 72.0895 6.09808   2
  25  -1   0 72.4161 4.43414   9
  25  -1   0 76.5090 4.81431   8
  25  -1   0 70.4148 3.91020   3
 -25  -1   0 72.1244 4.59234   9
 -25  -1   0 80.3039 4.42341   9
  25   1   0 90.3240 8.68926   2
  25   1   0 73.9043 5.35650   9
 -25   1   0 68.5123 4.41647   9
  25   1   0 76.6875 4.32893   6
  25   1   0 72.8824 4.06658   3
 -25   1   0 76.1631 4.81911   7
 -25   1   0 79.5376 8.50125   2
 -25   1   0 64.9651 4.23061   8
  25   1   0 65.7200 6.47192   2
  25   1   0 74.5424 4.76959   8
 -25   1   0 76.7485 4.29525   4
  25   1   0 66.1478 4.63256   9
  25   1   0 81.0994 4.74111   4
 -25   1   0 77.1341 4.34085   3
 -25   1   0 70.9516 4.68733   6
 -27  -1   0 246.281 11.1180   8
  27  -1   0 239.563 11.3378   8
 -27  -1   0 229.730 11.0360   9
  27  -1   0 227.719 11.2271   9
 -27  -1   0 228.690 11.1609   3
 -27  -1   0 258.839 11.2530   9
  27  -1   0 229.998 11.4485   4
 -27  -1   0 231.796 11.0492   4
  27  -1   0 233.808 11.0846   6
  27  -1   0 248.734 11.1143   9
 -27  -1   0 235.440 11.2888   7
 -27  -1   0 239.823 11.2670   6
  27  -1   0 248.142 12.9197   2
  27  -1   0 247.915 13.4314   2
 -27  -1   0 220.736 12.3777   2
 -27  -1   0 245.404 14.0398   2
  27  -1   0 234.848 10.7160   3
 -27   1   0 213.763 11.7505   6
 -27   1   0 232.444 12.4833   2
  27   1   0 224.567 12.8581   2
 -27   1   0 244.216 11.4247   9
  27   1   0 221.804 11.2651   4
 -27   1   0 234.404 11.0075   4
  27   1   0 231.479 11.9168   8
 -27   1   0 231.890 10.9732   3
  27   1   0 250.146 11.1747   9
  27   1   0 257.321 11.0862   6
 -27   1   0 239.157 11.0421   8
  27   1   0 228.897 13.3710   2
  27   1   0 248.677 11.2947   9
 -27   1   0 235.583 19.8559   2
  27   1   0 221.841 11.1471   3
 -29  -1   0 59.3682 4.63537   9
 -29  -1   0 53.3377 9.70645   2
  29  -1   0 60.4985 4.64939   9
  29  -1   0 72.8383 8.83427   2
  29  -1   0 59.3043 3.55652   3
  29  -1   0 51.3427 8.72920   2
  29  -1   0 65.8819 5.08527   8
  29  -1   0 61.3459 4.96151   4
  29  -1   0 52.9801 4.30095   9
 -29  -1   0 61.3476 4.96316   6
 -29  -1   0 53.5518 4.06639   8
 -29  -1   0 56.9650 4.09616   4
  29  -1   0 54.5871 4.18265   6
 -29  -1   0 77.7979 6.66111   2
 -29  -1   0 56.1774 5.06882   7
 -29  -1   0 50.8423 4.73520   3
 -29  -1   0 53.5019 4.20710   9
 -29   1   0 55.2078 5.02340   7
  29   1   0 50.8027 6.68709   9
  29   1   0 52.9694 8.93734   2
  29   1   0 50.9031 7.24620   2
  29   1   0 58.2769 5.10883   8
 -29   1   0 48.3989 6.50148   2
  29   1   0 61.6386 4.57687   9
 -29   1   0 61.1717 4.77408   9
 -29   1   0 67.7609 12.7204   2
  29   1   0 56.1128 3.72607   3
 -29   1   0 59.4890 4.05579   8
  29   1   0 58.7162 5.01844   4
 -29   1   0 54.1291 4.32592   9
 -29   1   0 47.5314 4.94908   6
 -29   1   0 59.0669 4.04768   4
 -29   1   0 59.5177 4.39893   3
  29   1   0 51.9698 3.99298   6
  31  -1   0 211.447 10.5733   8
  31  -1   0 202.635 10.0283   6
  31  -1   0 194.579 13.6207   2
 -31  -1   0 213.794 10.0380   8
 -31  -1   0 198.326 10.1768   9
 -31  -1   0 205.444 9.99316   9
 -31  -1   0 221.255 10.5447   6
  31  -1   0 203.836 10.3077   9
 -31  -1   0 201.560 11.9762   2
  31  -1   0 196.654 12.3754   2
  31  -1   0 190.854 10.4286   4
  31  -1   0 212.438 10.0921   9
 -31  -1   0 205.540 15.2485   2
 -31  -1   0 209.493 10.5987   7
 -31   1   0 196.018 12.0284   2
 -31   1   0 219.079 10.3922   9
 -31   1   0 194.951 15.7143   2
  31   1   0 183.255 10.0984   9
 -31   1   0 232.632 10.0350   4
  31   1   0 198.041 14.2432   2
 -31   1   0 199.242 10.6973   7
 -31   1   0 165.025 11.4850   9
  31   1   0 204.184 12.5139   2
  31   1   0 201.030 9.63491   3
  31   1   0 211.047 10.3828   9
 -31   1   0 201.931 10.0492   3
  31   1   0 199.017 9.92239   6
 -31   1   0 217.675 9.99194   8
  33  -1   0 0.54361 1.49430   3
 -33  -1   0 0.31193 2.04054   9
 -33  -1   0 11.4927 11.4308   2
 -33  -1   0 -0.9820 2.34725   9
  33  -1   0 6.14527 6.44555   2
 -33  -1   0 1.66535 3.59567   2
 -33  -1   0 -0.4723 1.97657   8
  33  -1   0 0.04226 2.16744   9
  33  -1   0 1.16016 1.89821   6
  33  -1   0 5.63409 7.40614   2
  33  -1   0 0.49338 2.33659   9
  33   1   0 0.68124 1.61175   3
 -33   1   0 1.81654 1.96360   4
  33   1   0 1.62740 6.98083   2
  33   1   0 1.03940 2.24918   9
  33   1   0 3.98831 4.42000   2
  33   1   0 -0.4317 2.34938   9
 -33   1   0 1.77847 2.11814   9
 -33   1   0 2.17207 1.97041   8
 -33   1   0 0.12013 3.82645   2
 -33   1   0 1.62334 3.45886   9
  33   1   0 1.77384 1.96563   6
  35  -1   0 18.2076 3.20650   3
 -35  -1   0 22.5983 5.08710   2
  35  -1   0 27.5778 5.24341   9
 -35  -1   0 29.0589 5.29093   9
 -35  -1   0 15.2477 4.02035   8
  35  -1   0 25.2216 4.30577   6
  35  -1   0 29.1043 8.81414   2
 -35  -1   0 27.8821 4.63536   9
 -35  -1   0 19.7114 8.80761   2
  35  -1   0 32.9956 11.9460   2
  35  -1   0 26.6412 4.77300   9
 -35   1   0 21.6513 5.39625   9
  35   1   0 29.2015 3.47302   3
 -35   1   0 22.4654 4.82538   9
 -35   1   0 20.8259 3.99927   8
 -35   1   0 28.1046 4.04330   4
 -35   1   0 31.8712 8.25068   2
  35   1   0 18.9006 5.35240   2
  35   1   0 23.8667 4.12639   6
  35   1   0 27.2181 5.44318   9
  35   1   0 23.4738 4.95411   9
  37  -1   0 4.12061 1.96923   3
 -37  -1   0 2.73639 2.57956   8
  37  -1   0 3.81272 5.60139   2
  37  -1   0 1.68347 2.76933   9
 -37  -1   0 2.47393 4.95836   2
 -37  -1   0 2.05699 9.24347   2
  37  -1   0 4.78031 2.53349   6
  37  -1   0 2.57752 3.06294   9
  37  -1   0 6.96904 8.35365   2
 -37  -1   0 0.48821 2.56147   9
 -37  -1   0 3.55991 3.03779   9
 -37   1   0 5.28143 2.43003   8
 -37   1   0 4.83544 3.80569   9
  37   1   0 0.12903 1.99346   3
 -37   1   0 0.01059 2.26990   4
  37   1   0 7.23628 6.23905   2
 -37   1   0 1.57255 4.88037   2
 -37   1   0 3.24417 2.79837   9
  37   1   0 2.67371 3.16177   9
  37   1   0 6.41350 2.49551   6
  37   1   0 3.60085 3.01122   9
  39  -1   0 43.5785 11.5209   2
 -39  -1   0 44.5938 6.07931   9
  39  -1   0 50.3977 4.36677   3
 -39  -1   0 68.6642 15.7602   2
 -39  -1   0 48.3247 6.80524   9
  39  -1   0 39.9213 5.50952   6
  39  -1   0 45.6070 6.78764   9
  39  -1   0 38.7839 6.34271   9
 -39  -1   0 40.5228 5.42713   8
 -39   1   0 50.8915 10.7770   2
 -39   1   0 42.7631 6.27078   9
  39   1   0 38.6472 4.52132   3
 -39   1   0 37.9173 5.21550   8
  39   1   0 42.7953 5.44039   6
  39   1   0 33.3749 7.15761   9
  39   1   0 52.7608 6.52983   9
 -39   1   0 31.3228 7.00471   9
  39   1   0 55.5679 12.2391   2
  41  -1   0 45.3733 6.15825   6
  41  -1   0 35.7026 4.56012   3
 -41  -1   0 36.4968 5.72723   8
 -41  -1   0 44.8006 7.24344   9
  41  -1   0 34.1908 7.30839   9
  41  -1   0 40.2173 6.88501   9
 -41  -1   0 34.9710 7.44932   9
  41  -1   0 41.3436 9.85246   2
 -41  -1   0 38.5775 7.46285   2
 -41   1   0 39.5249 7.85256   9
 -41   1   0 39.9554 5.75540   8
  41   1   0 38.7197 5.89139   6
 -41   1   0 44.2360 7.10655   9
  41   1   0 36.6435 4.78293   3
  41   1   0 32.6118 7.91867   9
 -41   1   0 34.3125 7.66373   2
  41   1   0 40.4605 7.29318   9
  41   1   0 31.5919 12.8591   2
  43  -1   0 169.228 8.95794   3
  43  -1   0 182.514 10.3848   6
  43  -1   0 168.754 13.0828   9
 -43  -1   0 149.884 10.5299   9
 -43  -1   0 163.463 9.98960   8
 -43  -1   0 165.310 11.4103   9
  43  -1   0 167.241 16.9847   2
  43  -1   0 158.850 11.3109   9
 -43  -1   0 157.744 15.2793   2
 -43   1   0 201.279 15.9910   2
  43   1   0 151.518 11.0684   9
 -43   1   0 148.239 10.9100   9
  43   1   0 151.791 9.06748   3
  43   1   0 182.758 17.6208   2
  43   1   0 181.233 10.2121   6
 -43   1   0 158.178 9.86445   8
 -43   1   0 141.362 11.7277   9
  43   1   0 155.570 11.8728   9
 -45  -1   0 0.30613 3.72972   8
 -45  -1   0 2.99321 4.27883   9
  45  -1   0 0.75095 8.75260   2
 -45  -1   0 5.38719 7.75912   2
  45  -1   0 0.15315 2.91959   3
  45  -1   0 -1.7568 3.91212   6
  45  -1   0 -0.7526 4.82300   9
  45  -1   0 1.33154 4.61335   9
 -45   1   0 3.21950 5.40909   9
  45   1   0 4.33895 8.61802   2
 -45   1   0 -0.9362 8.51086   2
  45   1   0 1.22082 3.80697   6
  45   1   0 0.80021 4.69573   9
  45   1   0 -1.4606 3.04583   3
  45   1   0 2.12260 5.05945   9
 -45   1   0 1.62448 3.82447   8
 -45   1   0 -1.0595 4.52249   9
 -47  -1   0 80.5259 8.37025   8
  47  -1   0 71.4181 6.64752   3
 -47  -1   0 47.7376 10.4246   2
  47  -1   0 68.3958 8.84972   6
 -47  -1   0 60.4106 9.63771   9
  47  -1   0 72.2916 18.8596   2
  47  -1   0 47.4345 10.8425   9
  47   1   0 59.1954 8.55484   6
  47   1   0 69.4443 6.93459   3
 -47   1   0 71.6964 8.18650   8
  47   1   0 56.1840 12.3136   2
  47   1   0 66.0471 11.4786   9
 -47   1   0 43.7725 10.1773   2
 -47   1   0 50.2904 14.5906   9
 -49  -1   0 5.03299 6.67751   9
  49  -1   0 1.05667 5.94729   9
 -49  -1   0 4.92958 5.42082   9
  49  -1   0 2.00312 5.17753   6
  49  -1   0 0.94278 3.85909   3
 -49  -1   0 8.41632 9.99926   2
  49  -1   0 -4.6697 5.99423   9
 -49  -1   0 2.35075 4.91421   8
  49  -1   0 -5.1588 11.1573   2
  49   1   0 -0.3650 6.61077   9
  49   1   0 -0.4304 4.95300   6
 -49   1   0 -2.2542 7.09603   9
  49   1   0 2.47712 11.3852   2
 -49   1   0 2.85014 10.9279   2
 -49   1   0 2.14003 5.95940   9
  49   1   0 -1.4286 8.51114   9
 -49   1   0 3.27391 5.07928   8
  49   1   0 2.76768 3.87657   3
  51  -1   0 -1.4342 7.02454   9
 -51  -1   0 -11.261 7.56935   9
 -51  -1   0 4.11436 10.9962   2
 -51  -1   0 -5.2347 5.99405   9
  51  -1   0 3.77373 6.88477   9
  51  -1   0 -2.6974 4.25775   3
  51  -1   0 -7.5600 13.0870   2
 -51   1   0 -3.3087 5.30531   8
  51   1   0 -2.4989 4.38060   3
 -51   1   0 2.04073 11.8230   2
 -51   1   0 -13.271 13.6290   9
 -51   1   0 5.71789 6.97782   9
  51   1   0 10.3914 13.8759   2
  51   1   0 3.96529 7.62484   9
  51   1   0 0.59211 7.21870   9
  51   1   0 0.00635 5.63242   6
 -53  -1   0 12.5357 8.67262   9
  53  -1   0 9.72498 15.3463   2
  53  -1   0 10.6462 5.22150   3
 -53  -1   0 18.8583 10.6526   9
  53  -1   0 3.08816 7.76317   9
  53  -1   0 1.12331 7.80615   9
  53  -1   0 2.77479 6.66079   6
 -53  -1   0 1.60042 6.32569   8
 -53  -1   0 12.8322 14.1506   2
 -53   1   0 8.57114 6.22062   8
  53   1   0 3.59334 4.95622   3
  53   1   0 8.06128 8.85690   9
  53   1   0 18.0884 16.5183   2
 -53   1   0 10.8295 14.6346   2
 -53   1   0 9.27152 7.88451   9
  53   1   0 20.0830 6.87562   6
   0  -2   0 109.562 4.56430   8
   0  -2   0 89.2548 4.61073   6
   0  -2   0 104.502 4.53868   5
   0   2   0 109.023 4.57747   6
   0   2   0 108.061 4.54372   5
   0   2   0 105.311 4.55891   8
  -2  -2   0 84.1361 3.69178   2
  -2  -2   0 83.1606 3.69121   8
   2  -2   0 89.0486 3.70398   2
   2  -2   0 84.7164 3.69045   4
   2  -2   0 82.0894 3.62597   5
  -2  -2   0 80.5722 3.67049   7
  -2  -2   0 88.0050 3.72073   2
   2  -2   0 83.5459 3.68614   2
   2  -2   0 82.6519 3.70460   6
  -2   2   0 79.1575 3.69470   6
  -2   2   0 84.3496 3.70883   2
  -2   2   0 80.8310 3.62238   5
   2   2   0 85.1724 3.71729   2
  -2   2   0 80.4687 3.75095   4
  -2   2   0 87.3495 3.68774   2
   2   2   0 81.6575 3.68795   8
   2   2   0 85.7663 3.70400   2
   2   2   0 80.4817 3.67911   7
   2   2   0 80.3487 3.70773   3
  -4  -2   0 2070.82 89.1544   7
   4  -2   0 2127.66 89.2492   2
  -4  -2   0 2037.68 89.2101   3
   4  -2   0 2115.65 89.2642   2
  -4  -2   0 2190.48 89.2856   2
  -4  -2   0 1874.64 89.2692   8
   4  -2   0 2058.30 89.1668   4
  -4  -2   0 2085.58 89.2462   2
   4   2   0 2120.22 89.1090   9
  -4   2   0 2061.11 89.1599   4
  -4   2   0 2045.03 89.1879   6
  -4   2   0 2136.45 89.2727   2
  -4   2   0 2088.96 89.2394   2
  -4   2   0 2081.05 89.1039   9
   4   2   0 2009.74 89.1434   7
   4   2   0 2035.17 89.1089   9
   4   2   0 2101.97 89.2588   2
   4   2   0 2027.28 89.1903   8
   4   2   0 2207.39 89.2822   2
  -4   2   0 2121.03 89.1105   9
  -4   2   0 2065.13 89.0964   3
   6  -2   0 208.379 9.36161   6
  -6  -2   0 221.866 9.27599   9
  -6  -2   0 213.620 9.37773   3
  -6  -2   0 218.803 9.49534   2
   6  -2   0 215.952 9.22376   3
  -6  -2   0 213.947 9.26382   9
   6  -2   0 184.744 9.56308   2
   6  -2   0 213.247 9.26207   9
   6  -2   0 217.609 9.32381   4
   6  -2   0 233.120 9.54858   2
  -6  -2   0 214.605 9.36275   8
  -6  -2   0 215.944 9.30628   7
   6  -2   0 213.782 9.27594   9
  -6   2   0 193.643 9.32458   4
  -6   2   0 213.374 9.21411   3
  -6   2   0 209.849 9.48047   2
   6   2   0 200.190 9.28877   7
   6   2   0 206.609 9.35117   8
   6   2   0 226.302 9.53710   2
   6   2   0 208.332 9.36158   3
  -6   2   0 209.164 9.29814   8
  -6   2   0 218.896 9.28835   9
   6   2   0 221.697 9.54775   2
  -6   2   0 214.790 9.35565   6
  -6   2   0 224.722 9.56989   2
   6   2   0 215.751 9.28838   9
  -6   2   0 219.018 9.31271   9
   6   2   0 218.811 9.30165   9
   8  -2   0 345.479 17.3561   2
   8  -2   0 393.987 17.0806   4
  -8  -2   0 375.962 17.0526   7
   8  -2   0 385.796 16.9639   3
   8  -2   0 399.641 17.0678   9
  -8  -2   0 394.864 17.0512   9
   8  -2   0 392.830 17.0369   9
  -8  -2   0 359.694 17.2743   2
  -8  -2   0 414.420 17.0452   9
   8  -2   0 385.426 17.1205   6
  -8  -2   0 386.315 17.1313   3
  -8   2   0 449.684 17.4464   2
  -8   2   0 401.035 17.0603   9
   8   2   0 392.782 17.0523   6
   8   2   0 397.085 17.1066   4
   8   2   0 387.651 17.0467   7
   8   2   0 385.935 17.1174   3
   8   2   0 400.986 17.1266   8
  -8   2   0 393.338 17.1098   6
   8   2   0 390.619 17.3635   2
   8   2   0 412.098 17.3548   2
  -8   2   0 414.503 17.0902   9
  -8   2   0 390.896 16.9626   3
  -8   2   0 395.296 17.0669   4
  -8   2   0 392.278 17.0614   8
  -8   2   0 404.827 17.3117   2
   8   2   0 400.537 17.0600   9
   8   2   0 390.691 17.0718   9
 -10  -2   0 2.99179 1.09544   2
 -10  -2   0 4.47479 0.88664   9
 -10  -2   0 5.37845 0.86692   8
  10  -2   0 7.18730 1.66827   2
  10  -2   0 6.03196 0.93865   9
 -10  -2   0 5.62904 1.51293   2
  10  -2   0 5.23184 0.92272   6
  10  -2   0 5.30190 0.55894   3
 -10  -2   0 5.98131 0.89186   7
 -10  -2   0 4.65751 0.80583   9
 -10  -2   0 4.79005 1.00948   3
  10  -2   0 2.43825 0.99020   2
  10  -2   0 6.67240 0.85925   9
  10   2   0 4.18589 0.93261   8
 -10   2   0 4.73676 0.59870   3
 -10   2   0 5.13618 1.04089   2
 -10   2   0 4.69876 0.81259   4
 -10   2   0 5.16716 0.97098   9
  10   2   0 4.23125 0.89424   9
  10   2   0 3.70187 0.91560   4
  10   2   0 4.26709 0.78099   7
 -10   2   0 4.92660 0.78616   8
  10   2   0 4.56167 0.98424   9
 -10   2   0 4.93738 0.98940   6
 -10   2   0 7.05985 2.12628   2
  10   2   0 3.88462 1.08189   2
  10   2   0 4.07991 1.04918   2
  10   2   0 4.41272 0.77441   6
 -10   2   0 4.39702 0.90470   9
  10   2   0 5.42375 0.88542   3
 -12  -2   0 182.511 8.18350   2
 -12  -2   0 182.164 7.73494   9
  12  -2   0 169.074 7.55974   3
  12  -2   0 171.065 7.74799   9
 -12  -2   0 166.725 7.70950   6
 -12  -2   0 172.946 7.69238   9
 -12  -2   0 171.850 7.79069   3
 -12  -2   0 175.293 7.78454   8
  12  -2   0 175.731 7.70086   9
 -12  -2   0 165.091 7.70707   7
  12  -2   0 168.267 7.73245   4
  12  -2   0 165.641 7.72418   8
 -12  -2   0 174.268 8.38876   2
  12   2   0 167.740 7.73637   3
 -12   2   0 173.436 7.72572   9
 -12   2   0 174.644 7.70720   8
  12   2   0 162.934 7.73868   4
  12   2   0 170.603 7.68806   7
 -12   2   0 177.479 7.77829   6
  12   2   0 179.176 7.73196   9
  12   2   0 167.367 7.77528   8
 -12   2   0 171.924 7.70387   4
  12   2   0 171.340 8.29798   2
 -12   2   0 179.566 7.77322   9
  12   2   0 166.409 7.67882   6
  12   2   0 182.467 7.77975   9
 -12   2   0 174.385 8.15114   2
 -12   2   0 169.744 7.57730   3
  12   2   0 177.007 8.29160   2
 -12   2   0 177.695 7.79311   7
 -12   2   0 172.889 8.42104   2
  14  -2   0 251.052 11.3605   2
  14  -2   0 250.543 10.7439   9
  14  -2   0 238.849 10.8101   6
  14  -2   0 242.755 10.7812   8
 -14  -2   0 246.360 10.7538   7
 -14  -2   0 247.946 10.7622   6
  14  -2   0 250.601 11.3900   2
 -14  -2   0 219.639 10.8371   3
  14  -2   0 247.250 10.5890   3
 -14  -2   0 251.671 11.5375   2
 -14  -2   0 243.258 10.7632   9
 -14  -2   0 235.475 10.7169   9
  14  -2   0 232.776 10.7795   9
 -14  -2   0 234.715 11.2332   2
 -14  -2   0 241.577 10.8201   8
  14  -2   0 243.078 10.7809   4
  14   2   0 245.845 10.8071   4
  14   2   0 252.163 10.8235   9
  14   2   0 228.589 10.7059   6
 -14   2   0 253.079 10.8289   9
 -14   2   0 238.048 10.7358   4
  14   2   0 250.084 10.7786   9
  14   2   0 238.803 10.8227   8
 -14   2   0 259.650 11.6057   2
  14   2   0 238.120 10.7207   7
 -14   2   0 229.377 10.7898   7
  14   2   0 229.806 11.3758   2
  14   2   0 244.690 10.7713   3
 -14   2   0 247.889 10.6160   3
 -14   2   0 250.069 10.7686   9
 -14   2   0 243.496 10.8060   6
 -14   2   0 233.047 10.7326   8
  14   2   0 246.972 11.3817   2
 -16  -2   0 81.9552 4.15285   8
 -16  -2   0 85.4354 4.07608   9
 -16  -2   0 86.6335 4.19602   7
  16  -2   0 84.3978 4.18864   9
  16  -2   0 85.3464 3.85932   3
 -16  -2   0 86.5932 4.14626   9
 -16  -2   0 85.2120 4.14251   6
  16  -2   0 85.6606 4.17195   6
  16  -2   0 81.5393 4.15919   8
 -16  -2   0 79.6306 4.90704   2
 -16  -2   0 88.4842 5.51966   2
 -16  -2   0 79.0192 4.20914   3
  16  -2   0 88.3943 5.14359   2
  16  -2   0 80.2791 5.08438   2
  16  -2   0 81.5133 4.17383   4
  16  -2   0 78.4655 4.07164   9
  16   2   0 81.8289 5.20074   2
 -16   2   0 83.7857 5.67262   2
 -16   2   0 84.7198 4.27236   9
  16   2   0 83.6696 4.07669   3
 -16   2   0 77.0514 4.13441   9
  16   2   0 85.1381 4.25206   8
 -16   2   0 83.7080 4.23795   7
  16   2   0 82.5281 4.20189   4
  16   2   0 78.6901 4.21951   9
  16   2   0 83.4060 5.17218   2
 -16   2   0 100.543 5.60309   2
  16   2   0 80.1468 4.04930   6
 -16   2   0 84.5550 3.92725   3
 -16   2   0 81.9615 4.07088   8
 -16   2   0 82.1568 4.20650   6
  16   2   0 83.3013 4.06458   7
  16   2   0 77.5560 4.16695   9
 -16   2   0 81.5079 4.07422   4
  18  -2   0 148.127 7.33736   9
  18  -2   0 151.111 8.27839   2
 -18  -2   0 170.704 7.48376   8
 -18  -2   0 153.941 7.39142   6
  18  -2   0 149.720 7.42312   4
  18  -2   0 160.832 7.44862   8
  18  -2   0 159.651 7.44999   9
 -18  -2   0 155.725 7.39833   9
 -18  -2   0 162.777 7.34791   9
 -18  -2   0 142.005 9.48571   2
  18  -2   0 154.392 7.42328   6
 -18  -2   0 169.987 7.50717   3
  18  -2   0 171.481 8.42123   2
  18  -2   0 162.814 7.14064   3
 -18  -2   0 162.990 7.43176   7
 -18  -2   0 178.002 8.24024   2
 -18   2   0 152.979 7.46402   6
  18   2   0 158.473 7.34698   3
  18   2   0 160.625 7.33712   6
 -18   2   0 150.151 7.33316   8
  18   2   0 163.530 7.50627   9
  18   2   0 163.516 7.43495   9
  18   2   0 146.129 8.37973   2
 -18   2   0 156.043 8.85432   2
  18   2   0 160.353 7.34455   7
 -18   2   0 161.599 7.48643   7
  18   2   0 158.629 8.38825   2
 -18   2   0 162.311 7.41292   9
 -18   2   0 163.884 7.22094   3
 -18   2   0 160.494 7.35337   4
  18   2   0 160.784 7.46955   4
  18   2   0 163.690 7.51571   8
 -18   2   0 167.613 7.53256   9
 -18   2   0 153.577 8.14572   2
  20  -2   0 499.752 21.9511   3
  20  -2   0 485.931 22.1314   9
 -20  -2   0 503.775 22.2484   8
 -20  -2   0 527.334 22.1566   9
 -20  -2   0 520.934 22.2013   9
 -20  -2   0 497.343 22.2244   3
  20  -2   0 493.811 22.2233   9
  20  -2   0 487.300 22.2168   6
 -20  -2   0 493.866 22.1700   6
  20  -2   0 518.785 23.0363   2
 -20  -2   0 509.996 22.1882   7
  20  -2   0 488.745 22.2074   8
  20  -2   0 505.821 23.0191   2
 -20  -2   0 494.559 22.8520   2
 -20  -2   0 532.019 23.3030   2
  20  -2   0 511.219 22.2171   4
 -20   2   0 500.753 22.1670   9
  20   2   0 503.767 22.1357   6
  20   2   0 495.740 22.2435   9
  20   2   0 508.040 22.1968   9
  20   2   0 514.731 23.0697   2
 -20   2   0 495.381 23.2678   2
  20   2   0 507.242 22.1506   7
 -20   2   0 493.724 22.1442   4
 -20   2   0 508.830 22.8763   2
 -20   2   0 525.341 22.2821   9
 -20   2   0 497.110 22.1601   8
 -20   2   0 514.046 22.0213   3
  20   2   0 490.438 22.1234   3
 -20   2   0 514.916 22.2482   7
 -20   2   0 514.460 22.2297   6
  20   2   0 507.516 22.2275   4
  20   2   0 521.276 22.2934   8
  22  -2   0 223.640 10.2992   9
 -22  -2   0 211.023 10.4044   8
 -22  -2   0 240.730 10.3158   7
 -22  -2   0 222.537 10.3181   3
 -22  -2   0 235.274 11.2183   2
  22  -2   0 220.051 10.2971   4
 -22  -2   0 229.717 10.2528   9
 -22  -2   0 237.920 11.9664   2
  22  -2   0 207.914 11.3369   2
  22  -2   0 220.166 10.3072   8
  22  -2   0 184.776 10.3922   6
 -22  -2   0 223.709 10.1495   9
 -22  -2   0 220.463 10.2499   6
  22  -2   0 218.670 9.89392   3
  22  -2   0 261.155 11.6934   2
  22  -2   0 234.502 10.2012   9
 -22   2   0 225.438 11.2931   2
 -22   2   0 227.881 10.2473   9
 -22   2   0 229.463 10.3319   6
 -22   2   0 186.890 10.7740   3
 -22   2   0 217.832 10.1582   8
 -22   2   0 220.534 10.3409   9
 -22   2   0 214.696 10.3454   7
  22   2   0 207.594 10.2594   4
  22   2   0 211.799 11.6712   2
 -22   2   0 228.980 10.1739   4
  22   2   0 220.065 10.2500   9
  22   2   0 217.299 10.1295   6
  22   2   0 223.644 10.3333   9
  22   2   0 224.529 10.1223   3
  22   2   0 221.055 10.1601   7
 -22   2   0 243.494 12.2462   2
  22   2   0 220.722 10.3801   8
  24  -2   0 324.653 15.8757   2
  24  -2   0 312.444 14.1372   3
  24  -2   0 338.056 14.6096   8
  24  -2   0 312.011 14.5344   9
 -24  -2   0 319.934 14.5317   7
  24  -2   0 322.436 14.4445   9
 -24  -2   0 332.216 14.4278   9
  24  -2   0 318.754 14.5692   4
 -24  -2   0 326.567 14.5835   3
 -24  -2   0 334.489 14.5535   8
 -24  -2   0 326.146 16.2654   2
 -24  -2   0 330.315 15.4693   2
 -24  -2   0 336.056 14.5292   9
  24  -2   0 309.933 15.6458   2
  24  -2   0 339.134 14.5427   6
 -24  -2   0 317.920 14.5222   6
  24   2   0 294.673 14.5358   9
 -24   2   0 301.028 14.5401   6
 -24   2   0 307.044 14.5831   7
 -24   2   0 334.545 14.6439   9
  24   2   0 324.589 15.8302   2
  24   2   0 316.087 14.4566   6
  24   2   0 340.080 14.5430   9
 -24   2   0 294.668 20.0845   2
 -24   2   0 311.030 14.4218   8
 -24   2   0 324.520 14.4760   9
  24   2   0 319.634 14.4203   7
  24   2   0 308.969 14.6196   8
  24   2   0 316.333 14.3517   3
 -24   2   0 333.495 14.4429   4
 -24   2   0 309.456 14.2644   3
  24   2   0 319.060 14.5646   4
 -24   2   0 329.159 15.5275   2
  24   2   0 303.722 16.0107   2
 -26  -2   0 64.6608 4.50140   3
 -26  -2   0 62.0048 4.51363   7
  26  -2   0 55.3453 4.22320   9
  26  -2   0 65.0123 4.03945   9
 -26  -2   0 60.3303 8.07972   2
 -26  -2   0 57.5032 5.89765   2
 -26  -2   0 64.4197 4.44235   6
  26  -2   0 54.9685 4.42250   8
 -26  -2   0 64.3766 3.95994   9
  26  -2   0 52.3730 6.21417   2
 -26  -2   0 57.8420 4.13015   9
  26  -2   0 67.9772 7.15128   2
  26  -2   0 56.1517 3.99034   6
 -26  -2   0 67.0628 3.97706   8
  26  -2   0 56.0942 3.36158   3
  26  -2   0 56.0442 4.45155   4
  26   2   0 60.2426 3.83802   6
  26   2   0 56.5288 3.66020   3
  26   2   0 50.9052 4.32295   9
 -26   2   0 65.9284 4.51887   9
  26   2   0 61.8595 4.22602   9
 -26   2   0 56.8356 3.80784   4
  26   2   0 59.6924 7.64489   2
 -26   2   0 64.4842 3.86337   8
  26   2   0 53.1487 5.12718   8
 -26   2   0 61.3481 4.71458   7
 -26   2   0 63.9048 5.16281   6
  26   2   0 53.8741 6.44890   2
 -26   2   0 63.8675 3.85147   3
 -26   2   0 63.5245 4.12569   9
 -26   2   0 64.5212 8.88135   2
  28  -2   0 338.010 15.7511   6
 -28  -2   0 336.939 15.8570   7
  28  -2   0 369.032 17.8252   2
  28  -2   0 341.152 15.6800   9
  28  -2   0 366.148 17.4429   2
 -28  -2   0 367.009 15.7030   9
 -28  -2   0 358.816 18.5099   2
 -28  -2   0 339.459 16.6691   6
 -28  -2   0 363.562 15.8129   9
 -28  -2   0 337.504 17.0345   2
  28  -2   0 341.371 15.9089   4
  28  -2   0 321.500 15.2994   3
  28  -2   0 330.683 15.8179   9
 -28  -2   0 352.011 15.9453   3
 -28  -2   0 341.039 15.7617   8
 -28   2   0 334.946 15.5262   3
 -28   2   0 337.860 15.9007   9
 -28   2   0 329.222 15.6295   8
 -28   2   0 361.811 18.9697   2
  28   2   0 335.626 17.4213   2
  28   2   0 377.603 18.1619   2
 -28   2   0 336.216 15.6423   4
 -28   2   0 342.602 17.0656   2
  28   2   0 355.056 15.6606   6
  28   2   0 357.865 15.5667   3
 -28   2   0 345.974 15.9788   7
  28   2   0 348.935 16.0107   8
 -28   2   0 341.513 15.7238   9
 -28   2   0 346.005 15.9549   6
  28   2   0 341.795 15.8854   4
  28   2   0 326.465 15.8558   9
 -30  -2   0 222.020 10.5061   9
 -30  -2   0 219.969 10.3660   8
  30  -2   0 217.216 9.82782   3
  30  -2   0 218.878 10.3397   9
 -30  -2   0 198.088 14.6791   2
  30  -2   0 217.716 10.4173   6
 -30  -2   0 214.873 10.8071   7
 -30  -2   0 208.598 10.2674   9
  30  -2   0 212.284 10.7649   4
  30  -2   0 228.052 12.5898   2
 -30  -2   0 209.333 12.0998   2
  30  -2   0 205.246 10.5428   9
 -30   2   0 185.001 12.0271   2
  30   2   0 237.256 14.4988   2
 -30   2   0 204.273 10.8135   7
 -30   2   0 208.165 10.7613   6
  30   2   0 205.888 10.7859   9
  30   2   0 208.028 10.8718   4
 -30   2   0 217.999 10.2473   4
 -30   2   0 215.330 10.4178   9
 -30   2   0 219.907 10.2230   3
  30   2   0 207.910 10.8312   8
 -30   2   0 207.159 10.6038   9
 -30   2   0 219.590 10.2538   8
  30   2   0 215.552 10.0695   3
  30   2   0 218.116 10.2595   6
 -32  -2   0 153.095 8.47428   9
 -32  -2   0 167.954 14.2596   2
 -32  -2   0 158.621 9.06867   7
  32  -2   0 143.932 8.53520   9
 -32  -2   0 160.687 8.28151   8
 -32  -2   0 184.246 12.0381   2
  32  -2   0 164.930 8.33323   9
  32  -2   0 147.528 12.6188   2
  32  -2   0 159.913 7.58857   3
 -32  -2   0 163.054 8.25603   9
  32  -2   0 160.928 8.28182   6
  32   2   0 168.390 7.92576   3
 -32   2   0 144.381 8.69281   9
  32   2   0 140.625 11.2884   2
  32   2   0 137.950 10.6406   9
 -32   2   0 157.991 8.09322   8
  32   2   0 156.665 8.11213   6
 -32   2   0 150.207 8.23028   3
 -32   2   0 159.763 8.12302   4
  32   2   0 148.796 8.61314   9
 -32   2   0 171.131 10.7401   2
 -34  -2   0 78.0319 6.12404   9
 -34  -2   0 75.0333 5.44595   8
  34  -2   0 75.9797 12.1191   2
 -34  -2   0 54.7427 14.7169   2
 -34  -2   0 71.6802 8.48756   2
  34  -2   0 72.1134 5.72494   9
  34  -2   0 48.2115 12.1017   2
  34  -2   0 69.5915 6.09136   9
  34  -2   0 82.4591 4.63823   3
  34  -2   0 77.2235 5.52614   6
 -34  -2   0 79.0183 5.57917   9
 -34   2   0 84.4641 5.35948   4
 -34   2   0 64.1080 8.72487   2
  34   2   0 65.3896 9.28635   9
 -34   2   0 74.4386 5.88063   9
 -34   2   0 72.6609 5.25736   8
  34   2   0 72.3767 9.80980   2
  34   2   0 80.5540 5.40707   6
  34   2   0 87.2393 6.15718   9
  34   2   0 75.1048 4.99400   3
  36  -2   0 104.928 11.0485   2
  36  -2   0 117.317 15.1374   2
 -36  -2   0 74.8190 17.0282   2
 -36  -2   0 98.2710 7.39261   9
 -36  -2   0 109.249 6.78674   8
  36  -2   0 112.969 6.84620   6
  36  -2   0 99.8739 7.05815   9
  36  -2   0 107.536 5.84163   3
 -36  -2   0 104.354 6.77797   9
  36  -2   0 91.5685 7.27590   9
  36   2   0 103.096 7.75695   9
  36   2   0 109.395 6.20766   3
  36   2   0 110.213 6.68292   6
 -36   2   0 114.970 6.69862   4
  36   2   0 99.6508 11.7957   2
 -36   2   0 104.708 6.59000   8
 -36   2   0 80.0915 10.4369   2
 -36   2   0 106.331 7.68162   9
  38  -2   0 1.94798 2.97913   9
 -38  -2   0 -0.7820 3.10370   9
  38  -2   0 6.65007 2.04907   3
  38  -2   0 1.95764 5.90701   2
  38  -2   0 5.97188 2.83584   6
 -38  -2   0 2.41952 2.72090   8
  38  -2   0 4.39800 3.19879   9
 -38  -2   0 5.51609 13.2544   2
  38  -2   0 10.7440 8.77447   2
 -38  -2   0 -2.9111 5.13285   2
  38   2   0 0.77439 2.20571   3
  38   2   0 2.71456 2.55960   6
 -38   2   0 -1.9471 5.50530   2
 -38   2   0 4.18352 3.93563   9
 -38   2   0 3.60425 3.05040   9
 -38   2   0 1.53957 2.57729   4
  38   2   0 1.28024 3.19682   9
  38   2   0 1.92492 3.43003   9
 -38   2   0 4.79320 2.68681   8
  38   2   0 1.42213 6.16420   2
  40  -2   0 2.94028 6.57593   9
 -40  -2   0 2.14128 3.05491   8
  40  -2   0 -2.4486 3.43524   9
 -40  -2   0 3.14946 5.77007   2
 -40  -2   0 -2.2006 2.97221   9
  40  -2   0 -1.7617 2.98232   6
 -40  -2   0 0.11847 3.62274   9
  40  -2   0 1.18323 2.19539   3
  40  -2   0 -2.4957 10.6580   2
  40  -2   0 -3.3175 5.89284   2
 -40   2   0 -3.1036 3.94091   9
  40   2   0 -1.8937 2.84690   6
  40   2   0 1.65773 3.93638   9
 -40   2   0 -1.8040 2.85399   8
 -40   2   0 2.38229 5.49208   2
  40   2   0 0.18683 2.42651   3
  40   2   0 1.49117 7.10943   2
 -40   2   0 0.21676 3.42107   9
  40   2   0 3.61252 3.69190   9
  42  -2   0 46.9618 7.42143   9
 -42  -2   0 39.4740 11.9976   2
  42  -2   0 48.8636 7.74554   9
 -42  -2   0 39.6327 9.15552   9
  42  -2   0 50.8211 6.57932   6
 -42  -2   0 35.9538 6.81522   9
  42  -2   0 39.7576 8.35324   2
  42  -2   0 48.2652 4.82263   3
 -42  -2   0 33.8760 6.13251   8
  42   2   0 51.9382 15.1705   2
 -42   2   0 46.8325 10.1795   9
  42   2   0 40.8840 8.80779   9
 -42   2   0 52.8930 6.24270   8
  42   2   0 42.3214 7.95213   9
  42   2   0 43.4121 6.27348   6
 -42   2   0 52.7310 12.7704   2
  42   2   0 41.8089 5.32407   3
 -42   2   0 38.8428 7.67838   9
 -44  -2   0 114.363 10.2483   9
  44  -2   0 98.3141 8.70767   6
 -44  -2   0 95.1901 8.43928   8
 -44  -2   0 101.341 14.3765   2
  44  -2   0 114.889 16.2686   2
  44  -2   0 104.563 9.83745   9
  44  -2   0 106.032 9.46295   9
  44  -2   0 106.348 6.97584   3
 -44  -2   0 98.7649 8.96766   9
  44   2   0 87.6799 17.6186   2
  44   2   0 113.036 8.51258   6
 -44   2   0 104.611 8.25673   8
  44   2   0 106.197 7.38880   3
 -44   2   0 99.0690 15.1941   2
 -44   2   0 112.705 10.0220   9
  44   2   0 106.762 11.0945   9
  46  -2   0 6.33348 4.94248   9
 -46  -2   0 6.58388 4.44107   9
 -46  -2   0 4.59618 5.31737   9
  46  -2   0 4.48917 3.16453   3
 -46  -2   0 2.29586 4.02624   8
  46  -2   0 0.38183 4.15691   6
  46  -2   0 0.79746 8.53686   2
 -46  -2   0 1.31593 7.63614   2
  46  -2   0 0.08143 4.83094   9
 -46   2   0 0.09840 5.84171   9
  46   2   0 1.91858 4.13686   6
  46   2   0 2.55483 5.77227   9
  46   2   0 3.35105 3.35301   3
 -46   2   0 5.71045 5.11049   9
 -46   2   0 -4.7974 9.04418   2
  46   2   0 14.4090 10.2506   2
  46   2   0 6.39917 5.32913   9
 -46   2   0 1.41731 3.99252   8
 -48  -2   0 60.1086 17.1649   2
  48  -2   0 55.2136 10.8972   9
 -48  -2   0 51.3994 8.63849   8
  48  -2   0 48.4315 10.5129   9
 -48  -2   0 50.4226 9.45458   9
  48  -2   0 66.0069 6.92717   3
  48  -2   0 56.2905 11.8704   2
  48  -2   0 53.1410 9.19975   6
  48   2   0 44.3470 7.70363   9
 -48   2   0 55.5188 11.8651   2
  48   2   0 66.2266 7.46207   3
  48   2   0 74.6941 9.06709   6
 -48   2   0 58.1579 8.42090   8
  48   2   0 67.9788 13.3180   2
 -48   2   0 53.1208 11.2739   9
 -50  -2   0 112.753 11.7045   9
  50  -2   0 121.303 9.35769   3
 -50  -2   0 155.178 20.3142   2
  50  -2   0 90.8100 12.5524   9
  50  -2   0 127.698 11.7075   6
 -50  -2   0 136.423 11.3727   8
 -50   2   0 138.490 22.5723   2
 -50   2   0 127.276 15.3180   9
  50   2   0 131.326 9.72318   3
 -50   2   0 150.542 11.2438   8
  50   2   0 144.262 11.7330   6
  50   2   0 86.2312 25.5680   2
  50   2   0 120.985 15.4234   9
  52  -2   0 1.46703 6.04148   6
  52  -2   0 0.42580 6.84346   9
 -52  -2   0 6.96567 12.5245   2
  52  -2   0 -3.7886 11.1125   9
 -52  -2   0 -0.3697 5.94905   8
  52  -2   0 -1.2670 13.5446   2
 -52  -2   0 0.39244 6.26322   9
 -52  -2   0 3.34870 7.76339   9
  52  -2   0 -2.1848 4.64863   3
  52   2   0 3.61266 4.79736   3
  52   2   0 -1.4867 16.0478   2
 -52   2   0 3.61573 9.69557   8
  52   2   0 5.20240 8.07944   6
 -52   2   0 -9.7418 13.0545   2
  52   2   0 0.05395 8.60572   9
   1  -3   0 635.187 27.5271   5
   1  -3   0 637.090 27.6014   6
  -1  -3   0 648.933 27.5867   8
   1   3   0 642.852 27.5779   8
  -1   3   0 648.444 27.5970   4
   1   3   0 632.877 27.5646   5
  -1   3   0 629.489 27.5928   6
   1   3   0 648.170 27.5827   7
  -1   3   0 648.583 27.5661   8
  -1   3   0 642.936 27.5321   5
   1   3   0 634.082 27.5818   6
   3  -3   0 1109.99 49.7052   6
   3  -3   0 1244.14 49.6823   2
  -3  -3   0 1010.02 49.7696   8
   3  -3   0 1169.11 49.6895   2
  -3  -3   0 1257.45 49.7158   2
   3  -3   0 1146.10 49.6835   4
  -3  -3   0 1133.42 49.6764   2
  -3  -3   0 1145.26 49.6626   7
   3  -3   0 1158.71 49.6027   5
   3   3   0 1147.40 49.6891   5
  -3   3   0 1265.67 49.7035   2
   3   3   0 1129.48 49.6850   8
   3   3   0 1147.94 49.6575   7
   3   3   0 1104.13 49.7091   3
  -3   3   0 1158.96 49.6748   4
  -3   3   0 1152.14 49.6954   6
  -3   3   0 1180.12 49.6719   2
  -3   3   0 1150.79 49.5956   5
   3   3   0 1163.28 49.7042   2
   3   3   0 1152.31 49.6878   2
   5  -3   0 1268.26 59.9019   5
   5  -3   0 1373.99 59.8952   6
  -5  -3   0 1389.27 59.8336   7
  -5  -3   0 1342.11 59.8773   8
   5  -3   0 1415.52 59.9331   2
  -5  -3   0 1380.92 59.9685   2
   5  -3   0 1433.85 59.8609   4
   5   3   0 1348.42 59.8732   8
   5   3   0 1385.70 59.9701   2
  -5   3   0 1433.19 59.8669   4
  -5   3   0 1465.91 59.9744   2
   5   3   0 1373.23 59.8174   7
   5   3   0 1427.55 59.7391   9
   5   3   0 1458.72 59.9615   2
  -5   3   0 1459.39 59.9364   2
   5   3   0 1434.56 59.7398   9
   5   3   0 1347.14 59.8994   3
  -5   3   0 1380.97 59.7583   3
  -5   3   0 1356.27 59.8751   6
   7  -3   0 2.89491 0.76963   2
   7  -3   0 2.31807 0.79062   2
   7  -3   0 0.72378 0.47240   4
  -7  -3   0 4.34178 0.74965   7
   7  -3   0 1.27424 0.48423   6
  -7  -3   0 1.56024 0.50264   3
  -7  -3   0 3.08214 0.39121   9
  -7  -3   0 1.73468 0.48876   8
  -7  -3   0 2.19532 0.36588   9
  -7  -3   0 2.31540 0.83450   2
  -7  -3   0 2.19938 0.69582   2
  -7   3   0 1.52234 0.71492   2
   7   3   0 1.40205 0.40378   7
   7   3   0 0.60311 0.44461   3
  -7   3   0 2.21818 0.39316   3
   7   3   0 2.60904 0.67556   9
   7   3   0 2.89419 0.60917   9
  -7   3   0 1.95266 0.43831   9
  -7   3   0 3.03876 0.90447   2
   7   3   0 0.14332 0.78764   2
  -7   3   0 1.64200 0.40320   4
   7   3   0 3.40989 0.82247   8
  -7   3   0 4.23062 0.84254   6
   7   3   0 2.12219 0.89509   2
  -7   3   0 2.39648 0.66673   9
  -9  -3   0 58.5009 2.88458   7
   9  -3   0 58.8616 2.70123   3
  -9  -3   0 53.5706 3.54098   2
   9  -3   0 61.5270 3.33408   2
  -9  -3   0 55.6956 3.58621   2
   9  -3   0 60.0778 2.78872   9
   9  -3   0 62.3709 2.92933   4
   9  -3   0 59.6175 2.77309   9
  -9  -3   0 61.2384 2.76678   9
  -9  -3   0 58.2067 2.95796   8
  -9  -3   0 58.4087 3.02677   3
   9  -3   0 60.7441 2.99012   6
  -9  -3   0 61.5101 2.81395   9
  -9   3   0 58.6059 2.97316   6
   9   3   0 59.2330 2.83035   6
   9   3   0 57.9560 3.42272   2
   9   3   0 58.9481 2.83642   7
  -9   3   0 63.2276 3.61273   2
  -9   3   0 62.8548 2.91595   9
   9   3   0 58.1067 2.84499   9
  -9   3   0 64.6496 2.86910   9
  -9   3   0 61.5405 3.30249   2
  -9   3   0 57.8035 2.84189   8
   9   3   0 61.2340 2.88689   9
  -9   3   0 63.0033 2.68470   3
   9   3   0 55.4218 2.95258   3
   9   3   0 63.2484 2.96274   4
   9   3   0 63.3613 3.46647   2
  -9   3   0 60.3980 2.86983   4
   9   3   0 59.6765 2.98015   8
 -11  -3   0 29.4327 1.65209   9
 -11  -3   0 25.6079 2.36301   2
  11  -3   0 32.2097 2.51628   2
 -11  -3   0 29.9845 1.80305   7
  11  -3   0 28.8935 1.83112   4
 -11  -3   0 30.1455 1.72848   9
  11  -3   0 29.3815 1.89291   6
 -11  -3   0 27.0581 1.83573   8
  11  -3   0 29.2727 1.71460   9
 -11  -3   0 29.1074 1.97988   3
  11  -3   0 30.0330 1.50320   3
  11  -3   0 26.2040 1.66855   9
  11   3   0 29.9892 1.85681   4
 -11   3   0 34.2580 1.88427   9
  11   3   0 32.8829 1.78385   9
 -11   3   0 33.4463 1.77466   4
  11   3   0 29.2764 1.70122   6
 -11   3   0 33.4467 1.81674   9
  11   3   0 30.2661 2.72705   2
 -11   3   0 30.2244 1.49380   3
 -11   3   0 28.9376 1.90643   6
 -11   3   0 30.4307 2.47863   2
  11   3   0 32.3204 1.70388   7
 -11   3   0 30.7383 2.95534   2
  11   3   0 28.9201 1.89144   8
  11   3   0 28.6371 2.67306   2
 -11   3   0 29.6233 1.71780   8
  11   3   0 34.7290 1.87559   9
  13  -3   0 186.752 8.70934   3
  13  -3   0 196.197 9.45481   2
 -13  -3   0 201.512 8.85323   9
  13  -3   0 190.180 8.96113   6
 -13  -3   0 187.568 8.95742   8
 -13  -3   0 190.935 9.56937   2
 -13  -3   0 204.523 8.82472   9
  13  -3   0 193.750 8.82458   9
 -13  -3   0 204.760 9.37369   2
 -13  -3   0 199.600 8.88427   7
  13  -3   0 209.207 8.93205   4
 -13  -3   0 194.087 9.00773   3
  13  -3   0 196.303 8.86642   9
 -13   3   0 204.219 9.69215   2
  13   3   0 209.307 8.99944   8
  13   3   0 201.538 8.95638   4
 -13   3   0 187.138 8.86787   9
  13   3   0 214.052 9.55465   2
  13   3   0 195.721 8.83818   6
  13   3   0 210.095 8.90044   9
 -13   3   0 200.644 9.38658   2
  13   3   0 197.729 9.52670   2
 -13   3   0 203.479 8.86650   8
  13   3   0 196.728 8.94725   3
  13   3   0 200.234 8.84327   7
 -13   3   0 194.382 8.69343   3
 -13   3   0 196.908 8.86608   4
  13   3   0 197.133 8.92203   9
 -13   3   0 212.490 8.95050   9
 -13   3   0 199.249 8.96452   6
 -15  -3   0 197.364 9.25033   8
  15  -3   0 206.650 9.12805   9
  15  -3   0 199.157 9.78481   2
  15  -3   0 192.868 9.82810   2
 -15  -3   0 203.619 9.14858   9
 -15  -3   0 195.239 9.28929   3
 -15  -3   0 202.080 9.10582   9
  15  -3   0 204.108 9.22779   4
  15  -3   0 198.858 8.94844   3
  15  -3   0 197.370 9.25214   6
 -15  -3   0 205.807 10.0451   2
 -15  -3   0 194.450 9.16743   7
 -15  -3   0 220.687 9.79054   2
  15  -3   0 204.855 9.18566   9
 -15   3   0 206.063 9.24044   9
 -15   3   0 205.807 9.75817   2
  15   3   0 203.132 9.28018   8
  15   3   0 204.569 9.19460   9
  15   3   0 210.872 9.23795   3
  15   3   0 207.609 9.24653   9
 -15   3   0 214.610 10.1964   2
  15   3   0 210.975 9.98660   2
 -15   3   0 194.259 9.24129   6
 -15   3   0 202.342 8.96836   3
  15   3   0 216.696 9.98693   2
  15   3   0 203.398 9.25013   4
 -15   3   0 217.266 9.20732   9
 -15   3   0 208.936 9.14985   8
 -15   3   0 209.804 9.15577   4
  15   3   0 191.222 9.10748   7
  15   3   0 207.415 9.12892   6
 -15   3   0 205.078 9.28895   7
  17  -3   0 -0.1347 0.87482   6
 -17  -3   0 -0.1576 0.94906   7
  17  -3   0 0.79954 0.85782   9
  17  -3   0 0.54492 0.55140   3
  17  -3   0 0.05271 0.96265   4
 -17  -3   0 0.89735 0.77621   8
 -17  -3   0 0.35163 0.98462   3
 -17  -3   0 1.02221 0.83727   9
 -17  -3   0 -0.1412 1.92037   2
  17  -3   0 0.42519 1.65278   2
 -17  -3   0 0.65699 0.73824   9
 -17  -3   0 1.52659 2.62285   2
  17  -3   0 0.92479 0.79294   9
  17  -3   0 1.59344 1.61127   2
  17   3   0 -0.6896 0.95568   9
 -17   3   0 1.07225 0.63116   3
  17   3   0 0.70702 1.00320   4
 -17   3   0 1.32425 0.91252   9
 -17   3   0 0.86462 0.79308   4
  17   3   0 1.48922 0.85663   3
  17   3   0 1.27687 0.74521   6
 -17   3   0 -1.2034 2.18460   2
  17   3   0 0.14857 1.00361   8
 -17   3   0 0.83045 0.78488   8
  17   3   0 -1.4992 2.06603   2
 -17   3   0 1.37030 0.96200   6
 -17   3   0 -0.0934 1.59468   2
  17   3   0 1.25429 0.96458   9
  17   3   0 0.69981 0.82394   7
 -17   3   0 0.57454 0.99553   9
 -17   3   0 -0.1354 0.97939   7
  17   3   0 1.03263 1.80150   2
 -19  -3   0 882.800 38.6014   3
  19  -3   0 931.619 39.2232   2
 -19  -3   0 874.381 38.4813   7
  19  -3   0 896.297 38.4574   9
 -19  -3   0 908.597 38.4918   9
  19  -3   0 889.218 38.5354   4
 -19  -3   0 897.259 38.4458   9
  19  -3   0 868.837 38.5836   6
  19  -3   0 882.084 39.2297   2
 -19  -3   0 891.071 39.3398   2
  19  -3   0 875.457 38.2668   3
 -19  -3   0 909.585 39.1190   2
 -19  -3   0 850.489 38.5797   8
  19  -3   0 893.492 38.5244   9
  19   3   0 861.848 38.4455   7
 -19   3   0 893.034 38.4761   4
  19   3   0 869.711 38.4479   6
  19   3   0 872.045 38.5928   8
  19   3   0 880.404 39.2806   2
  19   3   0 822.825 39.1731   2
  19   3   0 876.238 38.5475   4
 -19   3   0 911.181 38.4907   8
 -19   3   0 868.248 38.5465   6
 -19   3   0 876.929 38.5681   7
 -19   3   0 939.621 39.4554   2
  19   3   0 863.819 38.5101   3
  19   3   0 898.768 38.5623   9
 -19   3   0 931.988 38.5790   9
 -19   3   0 868.725 39.0828   2
 -19   3   0 890.126 38.4980   9
 -19   3   0 900.413 38.3069   3
  19   3   0 933.607 38.5305   9
  21  -3   0 5.79687 1.25884   3
 -21  -3   0 5.53424 1.12969   9
 -21  -3   0 1.99434 2.74881   2
 -21  -3   0 5.58642 1.25346   9
 -21  -3   0 4.68203 1.44276   7
  21  -3   0 5.53213 1.50937   4
  21  -3   0 8.78476 1.96556   9
 -21  -3   0 3.25716 1.07591   8
 -21  -3   0 6.50139 1.54123   3
  21  -3   0 9.33409 2.63553   2
  21  -3   0 6.02601 2.27987   2
  21  -3   0 8.63763 2.15812   9
 -21  -3   0 4.14670 2.08919   2
  21  -3   0 7.43591 1.97121   6
 -21   3   0 7.86921 1.57659   3
  21   3   0 6.72764 1.52407   4
  21   3   0 7.58103 1.76824   6
 -21   3   0 8.29457 1.77959   8
 -21   3   0 5.53710 1.44759   7
 -21   3   0 0.65831 4.62441   2
  21   3   0 4.64488 1.41609   9
 -21   3   0 12.7670 2.61016   9
 -21   3   0 5.47247 1.50236   6
 -21   3   0 11.0799 2.41940   2
  21   3   0 7.12705 1.24301   3
  21   3   0 8.20767 3.26245   2
  21   3   0 6.21953 1.56504   8
  21   3   0 7.85066 1.83209   7
  21   3   0 1.71513 2.30162   2
  21   3   0 5.54550 1.33087   9
 -21   3   0 8.27483 1.83729   4
 -21   3   0 7.28633 1.34779   9
  23  -3   0 531.494 23.2145   9
 -23  -3   0 523.432 23.1876   7
  23  -3   0 519.414 23.1073   9
 -23  -3   0 518.965 23.3038   3
 -23  -3   0 517.561 23.1505   9
  23  -3   0 517.361 23.2528   6
 -23  -3   0 533.424 23.0993   9
  23  -3   0 516.094 25.0686   2
  23  -3   0 517.916 22.8604   3
 -23  -3   0 576.825 24.6415   2
 -23  -3   0 508.501 23.2459   8
 -23  -3   0 557.426 24.0616   2
  23  -3   0 543.117 24.2390   2
  23  -3   0 519.638 23.2308   4
 -23   3   0 524.026 23.1790   9
  23   3   0 562.978 23.2369   9
  23   3   0 504.775 23.1788   3
 -23   3   0 515.223 23.1248   8
 -23   3   0 532.325 23.3012   7
 -23   3   0 516.140 23.1165   4
  23   3   0 529.850 23.2582   4
 -23   3   0 525.774 24.0105   2
 -23   3   0 515.786 22.9305   3
  23   3   0 532.563 23.1103   6
  23   3   0 518.689 23.1134   7
 -23   3   0 528.757 23.2933   9
  23   3   0 544.190 24.4424   2
 -23   3   0 513.698 24.6594   2
  23   3   0 537.533 23.3360   8
  23   3   0 497.299 24.2313   2
  23   3   0 522.331 23.2755   9
 -23   3   0 514.000 23.2377   6
 -25  -3   0 8.41231 1.49337   9
 -25  -3   0 7.71382 1.60048   8
  25  -3   0 5.69714 3.36452   2
  25  -3   0 9.07224 2.91416   2
 -25  -3   0 9.45040 6.42664   2
  25  -3   0 15.9844 3.17490   4
  25  -3   0 9.25781 2.55715   9
 -25  -3   0 9.48505 2.14177   3
  25  -3   0 8.53129 1.66792   3
 -25  -3   0 11.7431 2.74483   9
 -25  -3   0 7.42346 1.92154   7
  25  -3   0 11.5711 2.75354   9
 -25  -3   0 6.70875 2.51087   2
  25  -3   0 11.7078 2.48379   6
  25   3   0 8.59780 2.55763   7
  25   3   0 12.0911 2.28769   3
 -25   3   0 6.44971 3.55130   2
  25   3   0 9.14092 2.24220   6
 -25   3   0 6.21921 1.78032   6
 -25   3   0 14.0098 3.32414   7
  25   3   0 8.52988 2.01134   8
  25   3   0 13.5249 2.93899   9
  25   3   0 7.71594 1.85544   9
 -25   3   0 11.2270 2.61478   8
 -25   3   0 9.70093 2.30234   4
  25   3   0 6.66699 1.97065   4
  25   3   0 2.12994 4.14610   2
  25   3   0 6.26901 3.49644   2
 -25   3   0 11.8268 2.04790   9
 -25   3   0 12.9624 2.24340   3
 -25   3   0 14.5566 4.51446   2
 -25   3   0 7.03620 1.66229   9
 -27  -3   0 122.264 6.45977   8
 -27  -3   0 132.728 10.3390   2
  27  -3   0 123.188 9.28559   2
 -27  -3   0 126.477 6.53224   9
  27  -3   0 120.075 6.83968   4
  27  -3   0 121.616 5.86036   3
  27  -3   0 114.496 8.39765   2
 -27  -3   0 124.182 6.33373   9
  27  -3   0 129.602 6.53611   6
 -27  -3   0 118.411 6.80786   7
  27  -3   0 126.075 6.41281   9
  27  -3   0 122.286 6.60160   9
 -27  -3   0 116.738 8.10329   2
  27   3   0 123.379 6.31369   6
  27   3   0 119.812 6.74272   9
  27   3   0 131.407 10.0949   2
  27   3   0 138.751 6.42633   7
 -27   3   0 117.515 6.28964   4
 -27   3   0 123.375 6.89362   6
 -27   3   0 120.644 6.31652   8
 -27   3   0 121.727 6.17053   3
  27   3   0 119.117 6.68091   9
 -27   3   0 111.412 12.1452   2
 -27   3   0 124.690 7.04027   7
 -27   3   0 117.145 8.30307   2
  27   3   0 108.054 8.73912   2
 -27   3   0 119.557 6.87249   9
  27   3   0 120.979 6.26704   3
 -27   3   0 119.399 6.57822   9
  27   3   0 129.151 6.86412   4
  27   3   0 122.946 6.95336   8
 -29  -3   0 4.59673 1.67808   9
 -29  -3   0 4.25213 1.88434   8
  29  -3   0 4.56073 3.55513   2
  29  -3   0 2.41563 1.76716   9
  29  -3   0 7.42745 2.58324   4
  29  -3   0 0.59602 1.85779   9
  29  -3   0 5.18547 4.49830   2
 -29  -3   0 5.61303 3.26068   2
  29  -3   0 2.33767 1.22182   3
 -29  -3   0 6.06534 2.99739   7
 -29  -3   0 4.53802 1.91242   9
 -29  -3   0 2.67360 5.21485   2
  29  -3   0 2.73656 1.78099   6
  29   3   0 3.60032 2.03130   9
 -29   3   0 2.37448 1.70510   3
  29   3   0 11.1892 2.84024   6
 -29   3   0 5.03937 2.70081   7
 -29   3   0 3.26354 1.88089   9
  29   3   0 2.63797 1.51371   3
  29   3   0 -0.3992 2.56098   8
  29   3   0 3.60897 2.36474   4
 -29   3   0 3.77765 2.19928   9
 -29   3   0 3.67342 1.66376   8
 -29   3   0 2.00288 2.40186   6
  29   3   0 -1.0136 3.41830   2
  29   3   0 4.37547 2.12004   9
 -29   3   0 4.32810 1.66941   4
 -29   3   0 5.96963 3.78218   2
  31  -3   0 103.257 9.03561   2
  31  -3   0 110.880 6.65231   9
  31  -3   0 115.126 5.55804   3
 -31  -3   0 106.536 6.31169   8
 -31  -3   0 123.129 6.33601   9
 -31  -3   0 130.503 12.2373   2
 -31  -3   0 111.917 6.54028   9
 -31  -3   0 104.249 8.56866   2
  31  -3   0 106.662 6.36388   9
  31  -3   0 100.341 7.13373   4
 -31  -3   0 97.0895 7.11894   7
  31  -3   0 123.838 6.52432   6
  31  -3   0 99.1152 10.4815   2
  31   3   0 106.159 6.14958   6
 -31   3   0 110.638 6.53000   9
  31   3   0 98.2581 6.76987   9
 -31   3   0 103.926 7.03319   9
 -31   3   0 113.007 8.97839   2
  31   3   0 119.286 9.94641   2
 -31   3   0 107.354 6.13953   8
 -31   3   0 106.559 6.13699   4
  31   3   0 106.782 6.02983   3
 -31   3   0 110.318 6.15282   3
  31   3   0 105.248 6.89493   9
 -33  -3   0 79.3871 14.0554   2
 -33  -3   0 102.238 6.31304   9
  33  -3   0 96.8790 5.45909   3
  33  -3   0 107.031 6.48454   9
 -33  -3   0 109.976 6.39119   8
 -33  -3   0 118.078 9.01144   2
  33  -3   0 100.043 11.7136   2
  33  -3   0 113.125 6.53449   6
  33  -3   0 107.221 9.75101   2
 -33  -3   0 123.610 6.82574   9
 -33   3   0 105.253 6.17317   8
 -33   3   0 96.1850 6.16233   4
  33   3   0 108.331 6.04004   3
  33   3   0 106.672 6.25377   6
 -33   3   0 106.059 7.34764   9
  33   3   0 97.8586 10.3458   2
 -33   3   0 94.0634 6.67095   9
  33   3   0 93.4827 7.10329   9
  33   3   0 100.522 6.94400   9
 -33   3   0 108.278 9.50631   2
  35  -3   0 67.8780 5.94226   9
  35  -3   0 59.4206 9.54799   2
 -35  -3   0 66.4320 8.73848   2
  35  -3   0 53.9755 6.17110   3
 -35  -3   0 65.8071 5.30060   8
  35  -3   0 73.9400 5.62440   9
 -35  -3   0 72.6709 5.98665   9
 -35  -3   0 65.9149 5.29859   9
  35  -3   0 62.2733 5.56916   6
 -35  -3   0 50.6064 15.0663   2
  35  -3   0 61.9435 12.8616   2
 -35   3   0 53.6549 5.02080   8
 -35   3   0 65.6638 5.18953   4
  35   3   0 72.5033 10.4871   2
 -35   3   0 69.5341 6.69391   9
  35   3   0 65.6553 4.89640   3
  35   3   0 62.9645 5.19036   6
 -35   3   0 70.5612 6.06603   9
  35   3   0 61.1790 6.68746   9
 -35   3   0 63.8482 9.39144   2
 -37  -3   0 -0.7635 2.43228   9
  37  -3   0 -1.5546 2.67556   9
 -37  -3   0 0.65769 3.25011   9
  37  -3   0 -1.3022 1.80268   3
  37  -3   0 -0.0017 5.51161   2
  37  -3   0 1.31202 2.59730   6
  37  -3   0 1.02337 2.85851   9
  37  -3   0 3.54188 7.64997   2
 -37  -3   0 -2.5301 4.45371   2
 -37  -3   0 0.44225 2.51526   8
 -37  -3   0 -5.4855 9.50054   2
  37   3   0 2.07952 2.41531   6
 -37   3   0 0.46536 3.39218   9
 -37   3   0 0.19895 2.27518   4
  37   3   0 1.90673 5.35096   2
 -37   3   0 3.07220 5.71679   2
  37   3   0 1.67322 3.31061   9
 -37   3   0 0.44300 3.29740   9
 -37   3   0 1.41848 2.47524   8
  37   3   0 0.33536 2.16784   3
 -39  -3   0 19.5795 6.11279   2
  39  -3   0 21.7669 6.06295   9
 -39  -3   0 21.4337 5.33258   9
  39  -3   0 24.9706 6.53541   2
 -39  -3   0 31.0420 5.22635   8
  39  -3   0 26.3623 3.83922   3
  39  -3   0 19.8194 3.56591   9
  39  -3   0 19.8387 3.64609   6
 -39  -3   0 11.0770 11.3892   2
 -39  -3   0 21.2494 6.33603   9
  39  -3   0 -6.0285 11.3422   2
  39   3   0 24.8214 7.54991   2
 -39   3   0 21.5337 4.87048   8
  39   3   0 20.9324 3.99503   9
 -39   3   0 23.9110 6.39698   2
  39   3   0 26.0493 7.08730   9
  39   3   0 22.9241 4.99504   6
 -39   3   0 20.1874 3.74523   9
  39   3   0 30.1199 4.57848   3
 -39   3   0 21.6475 4.94939   4
 -41  -3   0 1.58143 3.20499   9
 -41  -3   0 2.01819 3.84679   9
  41  -3   0 2.13998 3.36163   6
 -41  -3   0 -0.6631 5.88343   2
 -41  -3   0 0.54148 12.3163   2
 -41  -3   0 1.27797 2.99537   8
  41  -3   0 0.92789 2.34770   3
  41  -3   0 2.62509 11.3065   2
  41  -3   0 -2.8337 3.51717   9
  41  -3   0 4.33292 3.56301   9
  41  -3   0 0.81642 6.25923   2
 -41   3   0 3.31490 4.10677   8
 -41   3   0 0.43933 3.85623   9
  41   3   0 1.73846 2.70996   3
 -41   3   0 -7.7315 6.65454   2
  41   3   0 1.96547 8.01164   2
  41   3   0 5.45354 4.33090   9
 -41   3   0 -3.0883 4.62757   9
 -41   3   0 -1.7934 2.92978   4
 -43  -3   0 43.8329 6.84322   9
  43  -3   0 46.3883 7.12388   6
  43  -3   0 32.3503 4.98257   3
  43  -3   0 33.1454 8.66567   2
  43  -3   0 39.6602 7.61173   9
 -43  -3   0 61.9264 8.28429   9
 -43  -3   0 39.0136 6.61400   8
  43  -3   0 35.9839 7.74184   9
 -43  -3   0 28.8481 7.23732   2
  43   3   0 34.0053 6.36659   3
 -43   3   0 30.3120 8.35142   9
  43   3   0 39.1482 6.53928   6
  43   3   0 36.6096 9.54043   9
  43   3   0 28.3967 9.05789   2
 -43   3   0 42.3950 6.41764   8
 -43   3   0 48.5275 13.9621   2
  45  -3   0 49.5758 8.05529   6
 -45  -3   0 60.0882 13.9441   2
  45  -3   0 65.3020 6.05860   3
 -45  -3   0 58.8954 7.73650   8
 -45  -3   0 59.7424 7.82150   9
  45  -3   0 60.2235 8.70564   9
  45  -3   0 61.7275 16.1654   2
 -45  -3   0 59.5260 9.30204   9
  45  -3   0 61.1926 8.64279   9
 -45   3   0 68.2340 9.84940   9
 -45   3   0 32.6599 8.90126   2
  45   3   0 66.0554 7.85868   6
 -45   3   0 63.8217 7.53814   8
  45   3   0 69.1808 11.2653   9
  45   3   0 52.7957 11.9132   2
  45   3   0 60.4994 6.68565   3
 -47  -3   0 4.55820 5.58674   9
  47  -3   0 -0.4740 4.94338   9
 -47  -3   0 -2.7786 4.32380   9
  47  -3   0 1.94281 9.55763   2
 -47  -3   0 2.17090 4.42426   8
  47  -3   0 1.00535 4.72398   6
  47  -3   0 -0.5254 4.81278   9
  47  -3   0 -0.6136 3.37724   3
 -47  -3   0 -5.2031 8.46897   2
  47   3   0 0.10430 4.38385   6
 -47   3   0 1.83744 6.75715   9
  47   3   0 4.92641 6.55974   9
  47   3   0 0.93681 3.59011   3
 -47   3   0 -4.8836 14.1753   2
 -47   3   0 -0.2953 5.76684   9
 -47   3   0 -2.6064 4.34588   8
  47   3   0 5.00108 11.5068   2
  47   3   0 1.13926 5.96868   9
  49  -3   0 123.125 11.8093   9
  49  -3   0 110.114 11.8564   9
  49  -3   0 130.979 11.5349   6
 -49  -3   0 97.7475 12.4953   9
 -49  -3   0 109.961 12.3493   9
  49  -3   0 111.465 8.80535   3
 -49  -3   0 129.505 11.1674   8
  49  -3   0 159.145 21.4087   2
  49   3   0 131.436 9.53607   3
  49   3   0 94.7167 25.4719   2
 -49   3   0 117.808 21.5176   2
 -49   3   0 131.488 10.5127   8
  49   3   0 118.540 15.5577   9
  49   3   0 112.395 10.9293   6
 -49   3   0 138.703 13.7226   9
 -51  -3   0 44.9955 10.2705   8
  51  -3   0 47.6121 13.6896   2
 -51  -3   0 27.2372 6.14182   9
  51  -3   0 38.1320 11.3015   9
 -51  -3   0 27.6895 11.6273   2
  51  -3   0 58.2650 11.0944   6
  51  -3   0 35.9154 6.86157   9
 -51  -3   0 29.4678 11.0782   9
  51   3   0 41.1801 10.4129   6
 -51   3   0 30.8911 6.20679   8
 -51   3   0 25.4399 14.3503   2
  51   3   0 36.6405 8.55670   3
  51   3   0 34.5949 15.8963   2
 -53  -3   0 40.5944 14.1097   2
 -53  -3   0 64.2280 11.6925   8
 -53  -3   0 48.0945 14.2719   9
  53  -3   0 40.1364 7.86734   9
  53  -3   0 57.8557 12.7473   6
  53  -3   0 89.0782 27.1022   2
 -53  -3   0 40.8374 11.6224   9
  53  -3   0 43.7312 13.0651   9
 -53   3   0 47.2393 11.0628   8
  53   3   0 65.0541 12.0407   6
  53   3   0 58.7569 9.81430   3
   0  -4   0 159.760 6.91921   8
   0  -4   0 159.183 6.83674   5
   0  -4   0 148.041 7.03091   6
   0   4   0 157.103 6.85153   5
   0   4   0 154.053 6.87203   8
   0   4   0 159.091 6.91761   6
  -2  -4   0 797.223 34.5587   8
   2  -4   0 810.202 34.4938   5
  -2  -4   0 809.266 34.4740   2
   2  -4   0 813.894 34.5861   6
  -2   4   0 802.510 34.5624   4
   2   4   0 805.395 34.5476   8
  -2   4   0 827.723 34.5260   8
  -2   4   0 800.826 34.4707   5
   2   4   0 869.718 34.4809   2
   2   4   0 807.644 34.5501   6
   2   4   0 810.524 34.5901   3
   2   4   0 804.182 34.5402   5
   2   4   0 671.607 34.5274   2
  -2   4   0 796.588 34.4553   2
  -2   4   0 807.375 34.5689   6
   4  -4   0 81.0347 3.98137   6
   4  -4   0 85.0216 3.96657   2
   4  -4   0 80.8065 3.94286   4
  -4  -4   0 88.7943 3.92005   7
  -4  -4   0 82.2735 3.94877   2
  -4  -4   0 86.5422 3.94869   8
   4  -4   0 90.4169 3.95667   2
  -4  -4   0 91.6101 4.01507   2
   4   4   0 86.0398 3.94903   8
  -4   4   0 89.0988 4.01894   2
   4   4   0 88.2857 4.00683   2
   4   4   0 84.6929 4.00402   7
  -4   4   0 86.7394 3.95428   2
  -4   4   0 82.4881 3.96294   6
  -4   4   0 86.8658 3.78501   5
  -4   4   0 85.7842 3.91730   4
   4   4   0 86.0075 3.96810   5
   4   4   0 84.5757 4.03733   2
   4   4   0 81.7085 3.97443   3
   6  -4   0 403.874 17.0596   4
   6  -4   0 414.583 17.3654   2
   6  -4   0 419.458 17.1498   2
   6  -4   0 391.524 16.9299   5
  -6  -4   0 392.514 17.0213   7
  -6  -4   0 360.184 17.1975   2
  -6  -4   0 395.009 17.0832   8
  -6  -4   0 393.936 17.1918   2
   6  -4   0 381.099 17.0996   6
   6   4   0 379.644 17.1598   2
  -6   4   0 402.757 17.1383   2
   6   4   0 402.130 17.2107   2
   6   4   0 375.391 17.0626   8
   6   4   0 375.798 17.0998   3
  -6   4   0 421.716 17.2036   2
   6   4   0 403.855 16.8662   9
  -6   4   0 382.770 17.0729   6
  -6   4   0 375.871 17.0135   4
   6   4   0 384.242 16.9905   7
   8  -4   0 12.2155 0.86274   5
   8  -4   0 13.4529 1.20048   4
  -8  -4   0 10.9815 1.52236   2
   8  -4   0 12.1162 1.59857   2
  -8  -4   0 10.0253 1.87897   2
   8  -4   0 10.6640 1.60259   2
  -8  -4   0 10.5348 1.10405   7
   8  -4   0 11.7391 1.21749   6
  -8  -4   0 11.1946 1.14523   8
  -8   4   0 11.3771 0.98255   9
  -8   4   0 10.4196 1.21946   6
   8   4   0 12.4002 0.99041   7
  -8   4   0 10.7848 2.00587   2
   8   4   0 10.8544 1.19503   3
  -8   4   0 11.8144 1.65660   2
   8   4   0 11.0962 0.92461   9
   8   4   0 13.7465 1.81546   2
  -8   4   0 10.3003 0.99714   9
  -8   4   0 11.6214 0.76123   3
   8   4   0 14.1152 1.22626   8
   8   4   0 10.8685 1.87996   2
   8   4   0 9.80324 0.99584   9
  -8   4   0 11.9759 1.06529   4
 -10  -4   0 0.81577 0.62711   8
  10  -4   0 3.65553 1.07558   2
 -10  -4   0 2.39154 0.64174   7
  10  -4   0 1.56277 1.03463   2
 -10  -4   0 3.99748 1.01343   2
  10  -4   0 1.71232 0.68901   4
 -10  -4   0 0.91738 1.18238   2
 -10  -4   0 1.88851 0.30609   9
 -10  -4   0 2.27550 0.50263   9
  10  -4   0 3.24990 0.68734   6
  10   4   0 2.86525 0.61831   9
 -10   4   0 2.01260 1.09530   2
  10   4   0 1.64114 0.72002   3
  10   4   0 2.86511 1.20832   2
 -10   4   0 2.06284 0.56304   8
 -10   4   0 2.13887 0.64326   9
 -10   4   0 2.74471 0.51092   3
  10   4   0 2.43512 0.74952   8
 -10   4   0 2.10134 0.58444   9
  10   4   0 2.61204 0.56627   7
 -10   4   0 2.31689 0.60563   4
 -10   4   0 2.57724 1.35097   2
 -10   4   0 2.81504 0.75337   6
  10   4   0 2.76580 1.24999   2
  10   4   0 2.93563 0.57626   9
  12  -4   0 204.831 9.25467   6
  12  -4   0 210.255 9.18448   4
 -12  -4   0 206.517 8.98017   9
 -12  -4   0 207.591 9.74457   2
 -12  -4   0 187.313 9.48264   2
 -12  -4   0 198.020 8.95935   9
 -12  -4   0 207.362 9.30279   3
 -12  -4   0 197.849 9.11651   7
  12  -4   0 210.610 8.96180   9
  12  -4   0 202.732 8.91365   3
 -12  -4   0 197.788 9.21607   8
  12  -4   0 198.981 8.96199   9
  12  -4   0 205.862 9.61763   2
  12  -4   0 215.956 9.59833   2
  12   4   0 208.055 9.23411   3
  12   4   0 199.175 9.70842   2
 -12   4   0 220.942 9.86617   2
  12   4   0 198.662 9.06052   7
  12   4   0 212.963 9.70569   2
  12   4   0 219.592 9.14627   9
  12   4   0 204.774 9.06800   6
 -12   4   0 198.861 9.07119   8
 -12   4   0 199.314 9.21311   6
  12   4   0 203.150 9.08455   9
 -12   4   0 207.894 9.14375   9
 -12   4   0 209.215 9.11457   4
 -12   4   0 199.942 8.88747   3
 -12   4   0 206.227 9.09334   9
  12   4   0 197.524 9.21831   8
  12   4   0 211.899 9.22159   4
 -12   4   0 200.640 9.54558   2
 -14  -4   0 53.4184 2.67378   9
 -14  -4   0 52.5717 3.18867   3
 -14  -4   0 49.4941 3.58511   2
  14  -4   0 53.0060 3.05468   4
  14  -4   0 53.4222 2.70527   9
  14  -4   0 50.3233 3.72249   2
 -14  -4   0 56.8208 2.94829   7
  14  -4   0 56.7571 2.74164   9
 -14  -4   0 52.3523 2.77290   9
 -14  -4   0 53.7399 2.99218   8
  14  -4   0 55.7915 3.04314   6
  14   4   0 52.6227 2.76974   6
  14   4   0 56.0785 3.07649   8
  14   4   0 52.5061 2.95656   9
  14   4   0 57.2610 2.97810   3
  14   4   0 52.9843 4.01525   2
  14   4   0 50.2790 4.10385   2
 -14   4   0 49.0553 2.79508   4
 -14   4   0 50.2165 2.87655   9
 -14   4   0 51.7195 3.74180   2
  14   4   0 52.3667 2.88180   9
  14   4   0 49.3513 2.76775   7
 -14   4   0 59.7442 4.53664   2
 -14   4   0 54.4697 2.51725   3
 -14   4   0 54.3207 2.98767   9
 -14   4   0 50.7376 2.77407   8
 -14   4   0 54.8748 3.08001   6
  14   4   0 54.4860 3.04317   4
  16  -4   0 204.701 9.23046   6
  16  -4   0 202.236 9.00920   9
 -16  -4   0 201.594 9.30214   3
  16  -4   0 204.642 8.81007   3
 -16  -4   0 212.747 9.01061   9
 -16  -4   0 198.139 8.94584   9
 -16  -4   0 213.557 9.75225   2
 -16  -4   0 197.177 9.18670   8
 -16  -4   0 187.382 9.31165   7
  16  -4   0 192.808 9.13531   4
  16  -4   0 194.602 8.95809   9
  16  -4   0 196.982 9.82958   2
  16   4   0 198.887 9.17084   4
 -16   4   0 191.385 9.17322   6
 -16   4   0 202.340 8.80560   3
  16   4   0 197.699 9.15080   3
 -16   4   0 203.622 9.15550   9
 -16   4   0 208.878 9.78115   2
 -16   4   0 205.947 9.22250   7
 -16   4   0 205.178 10.2371   2
  16   4   0 184.961 9.99668   2
  16   4   0 205.463 10.0026   2
 -16   4   0 204.459 9.04964   4
  16   4   0 211.611 9.17083   9
 -16   4   0 201.881 9.08553   9
  16   4   0 206.954 9.24831   8
  16   4   0 214.728 9.10557   9
 -16   4   0 186.286 9.00411   8
  16   4   0 192.564 8.98627   6
  16   4   0 191.691 8.99640   7
 -18  -4   0 12.7689 1.90480   8
 -18  -4   0 23.0737 2.59165   3
  18  -4   0 15.5944 3.50343   2
 -18  -4   0 19.0167 2.17648   7
  18  -4   0 18.1578 1.89544   9
 -18  -4   0 20.1931 1.73189   9
 -18  -4   0 17.2738 3.19853   2
  18  -4   0 18.9092 1.37153   3
  18  -4   0 17.6760 3.47232   2
 -18  -4   0 16.6313 1.90793   9
  18  -4   0 17.6966 2.27796   4
  18  -4   0 17.2125 1.83928   9
 -18  -4   0 17.4271 4.11108   2
  18  -4   0 15.7295 2.11149   6
  18   4   0 17.7590 2.23970   9
 -18   4   0 18.9879 2.40454   7
 -18   4   0 17.8789 1.82802   4
  18   4   0 17.4206 2.32844   8
  18   4   0 15.2528 3.85000   2
 -18   4   0 19.5602 2.34211   9
 -18   4   0 19.2748 2.31222   6
 -18   4   0 18.8633 3.48776   2
 -18   4   0 17.4184 1.80170   8
  18   4   0 15.6744 4.45575   2
 -18   4   0 16.7057 4.65460   2
  18   4   0 21.8740 2.01125   3
 -18   4   0 18.5563 2.18081   9
  18   4   0 16.7530 1.77158   6
  18   4   0 16.6971 1.81341   7
  18   4   0 17.7720 2.30942   9
 -18   4   0 18.1520 1.44521   3
  18   4   0 14.2358 2.26062   4
  20  -4   0 9.30772 2.39765   2
 -20  -4   0 16.0289 3.49467   2
 -20  -4   0 13.5811 1.98823   9
 -20  -4   0 15.6298 2.80365   3
 -20  -4   0 12.0803 1.79621   9
  20  -4   0 13.5530 2.42608   4
  20  -4   0 15.6665 2.04511   9
  20  -4   0 16.1562 2.01691   9
  20  -4   0 8.05504 2.15503   6
 -20  -4   0 10.2466 2.90014   2
 -20  -4   0 12.1313 2.02704   8
 -20  -4   0 14.6925 2.37366   7
  20  -4   0 12.8763 1.33989   3
  20  -4   0 12.3731 2.69242   2
 -20   4   0 15.9828 3.37025   2
  20   4   0 9.43910 1.88706   7
 -20   4   0 12.2687 2.55952   7
 -20   4   0 12.2036 1.83923   8
  20   4   0 12.6058 1.96123   3
 -20   4   0 12.8433 1.91884   4
  20   4   0 11.0151 2.49061   8
  20   4   0 5.15335 2.42663   2
 -20   4   0 15.7498 2.29178   9
 -20   4   0 14.2404 2.57743   9
 -20   4   0 16.9552 2.57062   6
 -20   4   0 14.7497 1.52491   3
 -20   4   0 19.0075 3.83745   2
  20   4   0 10.3303 2.45821   4
  20   4   0 10.5426 3.03689   2
  20   4   0 10.2906 1.83671   6
  20   4   0 12.9249 2.47521   9
  20   4   0 12.6064 2.54843   9
 -22  -4   0 116.620 6.12078   8
  22  -4   0 118.544 6.17687   6
  22  -4   0 123.430 6.06099   9
 -22  -4   0 113.390 6.18623   7
 -22  -4   0 128.183 5.90816   9
  22  -4   0 129.213 7.77438   2
  22  -4   0 116.727 6.24115   4
  22  -4   0 129.957 6.02264   9
 -22  -4   0 105.217 7.11825   2
  22  -4   0 108.436 7.33448   2
 -22  -4   0 118.241 8.24459   2
 -22  -4   0 122.434 5.99526   9
  22  -4   0 121.551 5.58938   3
 -22   4   0 127.955 6.34464   6
 -22   4   0 113.434 7.32625   2
 -22   4   0 123.625 8.88929   2
 -22   4   0 118.558 6.36801   7
 -22   4   0 121.069 6.14549   9
  22   4   0 123.306 7.85491   2
  22   4   0 127.845 5.95247   7
  22   4   0 120.579 5.92467   6
  22   4   0 131.330 6.23867   9
  22   4   0 113.752 6.33114   8
  22   4   0 128.307 6.33112   9
 -22   4   0 119.180 5.93394   8
  22   4   0 109.152 6.26963   4
 -22   4   0 121.080 5.94737   4
 -22   4   0 120.900 5.66360   3
 -22   4   0 129.827 6.37739   9
  22   4   0 109.819 8.39136   2
  22   4   0 123.091 6.04149   3
  24  -4   0 95.2497 5.49814   9
 -24  -4   0 117.669 7.11081   2
 -24  -4   0 111.019 5.84347   7
 -24  -4   0 116.709 8.52487   2
  24  -4   0 106.926 5.04490   3
  24  -4   0 103.280 5.71833   6
  24  -4   0 100.956 7.22776   2
  24  -4   0 103.000 5.59832   9
 -24  -4   0 105.258 5.41028   9
  24  -4   0 99.3557 7.61562   2
 -24  -4   0 112.028 5.69484   8
  24  -4   0 103.506 5.88571   4
 -24   4   0 100.430 5.77754   9
 -24   4   0 106.580 6.05885   9
 -24   4   0 105.638 5.47957   4
 -24   4   0 110.656 5.96691   6
 -24   4   0 99.7880 7.15272   2
  24   4   0 106.548 5.45410   7
 -24   4   0 101.947 5.42541   8
 -24   4   0 104.666 6.10356   7
 -24   4   0 95.9759 9.28750   2
  24   4   0 113.940 5.96936   4
  24   4   0 100.562 6.03177   8
  24   4   0 101.801 5.49604   3
  24   4   0 107.499 7.74028   2
  24   4   0 107.486 5.42884   6
 -24   4   0 110.360 5.19852   3
  24   4   0 108.365 5.99444   9
  24   4   0 113.733 8.68296   2
  24   4   0 108.144 5.85442   9
  26  -4   0 8.06087 1.74402   6
  26  -4   0 10.7231 3.15732   2
  26  -4   0 13.1251 2.89152   9
 -26  -4   0 11.3529 2.49855   9
  26  -4   0 7.54436 4.10103   2
 -26  -4   0 14.6984 2.69151   8
 -26  -4   0 14.7555 2.85518   9
  26  -4   0 13.6018 1.82566   3
  26  -4   0 13.9117 3.53052   4
 -26  -4   0 7.95457 2.84977   2
 -26  -4   0 9.89518 4.22845   2
 -26  -4   0 10.2957 2.18327   7
  26  -4   0 10.8805 2.81381   9
  26   4   0 12.2804 2.58846   7
 -26   4   0 10.4147 1.98513   9
  26   4   0 8.95151 1.65054   6
  26   4   0 14.1735 2.51863   8
  26   4   0 15.0595 2.60635   3
 -26   4   0 11.7540 3.33565   2
  26   4   0 13.3537 3.59761   9
  26   4   0 11.3070 2.26684   4
 -26   4   0 14.1411 2.46363   7
 -26   4   0 14.3891 3.58527   6
 -26   4   0 9.66359 2.56626   4
  26   4   0 14.4336 3.38261   9
 -26   4   0 12.9593 2.44745   8
  26   4   0 8.87183 3.43767   2
 -26   4   0 7.90970 2.23843   9
  28  -4   0 33.5527 3.70077   9
 -28  -4   0 40.3343 5.93795   2
  28  -4   0 30.4721 6.25964   2
  28  -4   0 33.6417 3.81453   6
 -28  -4   0 40.4938 3.45129   9
 -28  -4   0 35.9938 3.54548   8
 -28  -4   0 41.0720 4.55270   7
  28  -4   0 37.1045 4.85026   9
 -28  -4   0 44.0229 9.16482   2
  28  -4   0 36.2369 4.55157   4
 -28  -4   0 43.4878 3.80179   9
  28  -4   0 39.5200 2.76688   3
  28  -4   0 38.8661 7.66333   2
 -28   4   0 44.6039 4.71551   9
 -28   4   0 41.9679 3.27999   3
 -28   4   0 39.4821 3.47252   4
  28   4   0 34.1128 4.17209   9
 -28   4   0 48.6340 4.73423   6
  28   4   0 36.8768 4.53661   4
  28   4   0 45.5403 3.47618   6
  28   4   0 39.7031 3.44485   3
 -28   4   0 39.1804 6.15762   2
  28   4   0 39.6165 3.51933   7
 -28   4   0 37.4973 4.75756   7
 -28   4   0 43.4967 4.21915   9
  28   4   0 42.5051 4.52031   9
  28   4   0 37.3709 4.76082   8
 -28   4   0 39.7235 3.42042   8
 -30  -4   0 -1.3581 5.39068   2
 -30  -4   0 7.00017 2.73764   7
  30  -4   0 12.9745 3.45860   9
  30  -4   0 9.46355 2.19961   3
  30  -4   0 8.75679 2.84963   4
  30  -4   0 12.9564 3.99490   2
 -30  -4   0 8.40406 4.23102   2
  30  -4   0 10.3017 2.10182   9
 -30  -4   0 4.27181 2.02318   8
  30  -4   0 5.33939 4.65957   2
 -30  -4   0 9.29458 2.10335   9
  30  -4   0 4.90276 2.10131   6
 -30  -4   0 6.07591 1.90952   9
 -30   4   0 5.16756 2.55775   9
  30   4   0 7.83083 2.40398   9
  30   4   0 7.50566 4.33078   2
 -30   4   0 7.98946 1.83504   4
  30   4   0 5.43508 2.33996   9
 -30   4   0 8.76447 2.18168   9
  30   4   0 6.48806 1.86054   6
 -30   4   0 6.77369 4.09955   2
 -30   4   0 3.05030 1.79621   8
  30   4   0 7.89601 1.82133   3
 -30   4   0 12.5868 3.04475   3
 -32  -4   0 10.5363 6.75997   2
  32  -4   0 8.39709 5.38929   2
 -32  -4   0 10.0332 2.44588   9
 -32  -4   0 4.09001 3.55787   2
  32  -4   0 11.4442 2.35845   6
 -32  -4   0 12.3259 3.30819   7
 -32  -4   0 13.0773 3.46854   9
  32  -4   0 9.94379 2.34182   9
 -32  -4   0 11.1836 2.37217   8
  32  -4   0 12.1568 2.50819   3
  32  -4   0 14.4273 3.85029   9
  32  -4   0 18.0736 4.71122   2
  32   4   0 20.4051 4.93810   9
 -32   4   0 5.68185 2.49975   9
  32   4   0 14.2111 3.33668   3
  32   4   0 13.9006 3.41591   6
 -32   4   0 16.4600 4.60741   2
 -32   4   0 12.3307 3.38654   4
  32   4   0 14.7587 2.82655   9
  32   4   0 11.1100 4.86502   2
 -32   4   0 9.45513 2.19783   8
 -32   4   0 7.26536 2.86350   9
  34  -4   0 34.4764 8.60981   2
  34  -4   0 43.9502 5.10725   9
 -34  -4   0 44.5031 4.79898   8
 -34  -4   0 45.2095 4.56347   9
 -34  -4   0 68.8519 13.7455   2
  34  -4   0 51.0737 3.66688   3
 -34  -4   0 59.2840 5.23689   9
  34  -4   0 55.2241 11.3979   2
  34  -4   0 49.9648 5.09383   6
  34  -4   0 47.1525 5.00501   9
 -34  -4   0 55.0964 8.06509   2
 -34   4   0 33.3629 4.33630   8
  34   4   0 50.7115 6.19596   9
  34   4   0 55.2881 6.00364   9
  34   4   0 50.8258 4.58264   6
  34   4   0 49.1225 4.47577   3
 -34   4   0 45.8932 6.32226   9
 -34   4   0 52.6441 4.58076   4
  34   4   0 39.7724 10.0981   2
 -34   4   0 45.8860 5.64542   9
 -34   4   0 53.9759 8.87120   2
  36  -4   0 14.4988 2.90412   9
  36  -4   0 11.4496 2.90940   9
  36  -4   0 10.3995 7.68884   2
 -36  -4   0 17.3802 3.18542   9
  36  -4   0 14.9055 3.02231   6
 -36  -4   0 10.8924 8.57040   2
 -36  -4   0 17.9107 4.43089   8
 -36  -4   0 16.6387 4.39034   9
  36  -4   0 25.0767 3.24922   3
 -36  -4   0 16.4881 5.10129   2
  36  -4   0 11.2540 5.28607   2
  36   4   0 9.98555 6.17050   2
  36   4   0 21.2767 4.09009   3
  36   4   0 15.7566 3.44436   9
 -36   4   0 19.5350 4.12763   8
 -36   4   0 15.9313 5.24114   2
 -36   4   0 13.4032 3.74933   9
  36   4   0 16.5381 3.53727   9
  36   4   0 15.1656 2.76565   6
 -36   4   0 17.5468 3.30984   9
 -36   4   0 18.2198 4.23940   4
 -38  -4   0 122.537 10.5295   8
  38  -4   0 81.5774 10.0842   6
 -38  -4   0 107.801 7.75351   9
 -38  -4   0 116.648 19.1805   2
 -38  -4   0 99.7725 10.7827   2
  38  -4   0 105.937 6.12157   3
  38  -4   0 107.811 7.64968   9
  38  -4   0 115.613 7.46670   9
  38  -4   0 93.8017 12.0380   2
  38  -4   0 124.353 16.2889   2
 -38  -4   0 115.084 7.15167   9
  38   4   0 100.547 13.8821   2
  38   4   0 111.477 7.17044   6
  38   4   0 111.568 6.90873   3
  38   4   0 103.837 8.85200   9
 -38   4   0 106.727 12.1308   2
 -38   4   0 106.899 7.03258   8
 -38   4   0 104.414 8.20073   9
 -38   4   0 107.081 9.07724   9
 -38   4   0 109.369 7.07082   4
  38   4   0 98.8529 8.55466   9
  40  -4   0 12.7468 3.48908   9
  40  -4   0 23.5529 4.01409   3
 -40  -4   0 15.1432 3.87069   9
  40  -4   0 7.86036 9.85939   2
 -40  -4   0 14.7707 3.17031   9
  40  -4   0 13.6489 6.79889   2
 -40  -4   0 9.18814 3.39197   8
 -40  -4   0 16.5430 6.08361   2
  40  -4   0 13.6571 3.43372   9
  40  -4   0 14.4886 3.63638   6
 -40  -4   0 7.38307 13.1358   2
  40   4   0 21.7986 5.37065   6
  40   4   0 15.8244 4.31084   9
 -40   4   0 22.6534 6.09109   4
  40   4   0 14.1795 7.87648   2
 -40   4   0 11.1388 3.86055   9
 -40   4   0 21.9305 7.44772   2
  40   4   0 11.0969 8.30943   9
  40   4   0 17.6839 3.01325   3
 -40   4   0 9.80420 4.57667   9
 -40   4   0 20.4847 5.18127   8
  42  -4   0 63.9899 5.44938   3
 -42  -4   0 47.4852 14.5764   2
 -42  -4   0 62.6905 12.1948   2
  42  -4   0 63.5719 7.33987   9
  42  -4   0 75.6660 7.51053   6
  42  -4   0 64.0261 13.7767   2
 -42  -4   0 50.8794 7.63251   9
 -42  -4   0 67.9906 6.82530   9
 -42  -4   0 69.4329 6.93916   8
  42  -4   0 64.6210 7.29656   9
  42   4   0 61.3053 6.27197   3
 -42   4   0 61.0484 13.9979   2
 -42   4   0 52.8646 10.0177   9
  42   4   0 59.2134 15.7254   9
  42   4   0 69.2715 6.89133   6
  42   4   0 59.8177 16.6184   2
 -42   4   0 62.3255 6.59563   8
 -42   4   0 42.0256 12.4909   9
 -42   4   0 51.3062 6.53931   4
  44  -4   0 35.9146 5.19447   3
 -44  -4   0 30.5992 6.79412   9
  44  -4   0 25.5416 7.36168   9
  44  -4   0 15.1938 4.30313   9
 -44  -4   0 26.5777 7.94273   2
 -44  -4   0 32.9068 6.97843   8
 -44  -4   0 13.3846 4.70901   9
  44  -4   0 29.1914 7.51469   6
  44  -4   0 18.9741 7.58910   2
  44   4   0 30.9062 6.03470   3
 -44   4   0 23.2136 4.23076   4
  44   4   0 27.7078 10.3865   2
  44   4   0 25.4528 5.88146   9
 -44   4   0 15.3954 4.18739   8
 -44   4   0 17.8565 7.55325   2
  44   4   0 26.8250 6.71642   6
  46  -4   0 -1.2100 4.64994   9
 -46  -4   0 1.18626 4.63101   8
  46  -4   0 -0.9454 4.45768   9
  46  -4   0 2.51971 4.48674   6
  46  -4   0 -0.9118 9.00462   2
 -46  -4   0 11.8628 8.58958   2
  46  -4   0 -3.5613 3.24533   3
 -46  -4   0 -0.4058 4.95741   9
 -46  -4   0 -0.8565 5.02248   9
  46   4   0 -4.0574 4.23213   6
 -46   4   0 -0.1800 10.1747   2
  46   4   0 7.99464 11.3436   2
 -46   4   0 1.80770 6.61090   9
  46   4   0 -0.5908 3.57560   3
 -46   4   0 1.49109 5.49307   9
  46   4   0 0.92863 5.90181   9
  46   4   0 0.38972 6.20149   9
 -46   4   0 4.01078 4.28820   8
 -48  -4   0 4.59436 8.99282   2
  48  -4   0 -1.7822 5.02706   9
  48  -4   0 -1.9920 3.70305   3
  48  -4   0 2.52739 10.2537   2
 -48  -4   0 -0.0393 4.52308   9
  48  -4   0 1.26974 5.14819   6
 -48  -4   0 -0.2126 7.00175   9
  48  -4   0 3.54583 5.02005   9
 -48  -4   0 0.84588 5.16648   8
 -48   4   0 -0.3143 10.8516   2
  48   4   0 -0.7789 6.99261   9
  48   4   0 1.55134 7.19602   9
 -48   4   0 -3.6369 6.39506   9
 -48   4   0 -0.3779 4.64372   8
  48   4   0 0.36888 3.98933   3
  48   4   0 -1.0371 4.73028   6
  48   4   0 -8.8654 12.4630   2
 -50  -4   0 3.83905 5.21278   9
 -50  -4   0 4.96987 10.4188   2
 -50  -4   0 -1.0868 6.47591   9
 -50  -4   0 -0.9481 5.87700   8
  50  -4   0 -5.3137 5.74887   6
  50  -4   0 0.06963 5.70131   9
  50  -4   0 2.43876 5.67444   9
  50  -4   0 0.15491 4.27198   3
  50  -4   0 -17.562 11.3703   2
 -50   4   0 2.54087 5.24372   8
  50   4   0 2.21537 5.52350   6
  50   4   0 1.45794 4.47869   3
 -50   4   0 -2.2272 23.2163   2
  50   4   0 -0.5566 15.2263   2
  52  -4   0 1.58365 6.35803   9
 -52  -4   0 -1.0526 7.38741   9
 -52  -4   0 6.50456 5.83750   9
  52  -4   0 6.78116 4.98494   3
 -52  -4   0 2.21183 12.0396   2
  52  -4   0 -1.1063 13.6534   2
 -52  -4   0 2.20505 6.54858   8
  52  -4   0 2.26146 6.60879   6
  52  -4   0 1.66772 6.31225   9
  52   4   0 0.58853 5.09345   3
 -52   4   0 -7.5334 8.95030   8
   1  -5   0 3437.38 148.358   5
   1  -5   0 3401.86 148.467   6
  -1  -5   0 3416.61 148.442   8
  -1   5   0 3561.07 148.420   8
  -1   5   0 3453.30 148.372   5
   1   5   0 3411.90 148.468   3
   1   5   0 3399.17 148.444   7
  -1   5   0 3544.91 148.461   6
   1   5   0 3517.02 148.412   5
   1   5   0 3440.67 148.445   6
   1   5   0 3524.97 148.433   8
  -1   5   0 3418.43 148.467   4
   3  -5   0 666.042 29.0732   6
   3  -5   0 641.056 28.9480   2
  -3  -5   0 707.174 28.9652   2
  -3  -5   0 666.105 28.9327   2
  -3  -5   0 658.970 29.0394   8
   3  -5   0 667.031 28.9056   5
  -3   5   0 677.170 28.9139   5
   3   5   0 654.531 29.0721   3
  -3   5   0 714.034 28.9374   2
   3   5   0 689.701 28.9565   2
   3   5   0 653.374 29.0193   8
  -3   5   0 669.105 29.0346   4
   3   5   0 640.764 28.9536   2
  -3   5   0 674.654 28.9899   8
  -3   5   0 677.173 29.0517   6
   3   5   0 679.188 29.0266   6
   3   5   0 671.916 29.0248   5
   3   5   0 669.602 29.0097   7
  -3   5   0 691.291 28.9175   2
   5  -5   0 1498.58 61.9981   2
  -5  -5   0 1355.28 61.9674   2
  -5  -5   0 1430.25 62.0095   8
  -5  -5   0 1316.69 61.9938   2
   5  -5   0 1419.51 61.9900   4
   5  -5   0 1430.84 62.0405   6
  -5  -5   0 1458.83 61.9597   7
   5  -5   0 1431.18 61.8464   5
   5  -5   0 1452.82 61.9690   2
   5   5   0 1592.48 62.0260   2
  -5   5   0 1415.85 61.9620   4
  -5   5   0 1540.38 61.9806   2
  -5   5   0 1527.99 62.0087   2
   5   5   0 1464.20 61.9988   8
   5   5   0 1420.05 62.0021   5
   5   5   0 1406.99 61.9334   7
  -5   5   0 1425.44 61.8296   5
   5   5   0 1450.81 62.0209   2
   5   5   0 1376.06 62.0317   3
  -5   5   0 1408.71 62.0013   6
   7  -5   0 27.0173 1.90872   6
   7  -5   0 30.0960 2.08125   2
  -7  -5   0 31.4170 1.81030   7
  -7  -5   0 30.3127 2.24828   2
  -7  -5   0 29.1484 1.82299   8
  -7  -5   0 31.0895 2.04599   2
   7  -5   0 27.9762 1.85923   4
   7  -5   0 30.6063 2.09590   2
   7  -5   0 32.2837 1.56331   5
   7   5   0 31.9538 2.32092   2
   7   5   0 30.8762 1.89807   3
  -7   5   0 28.3801 1.74979   4
  -7   5   0 27.3794 2.40401   2
  -7   5   0 30.0178 1.93340   6
  -7   5   0 36.8066 2.45348   2
   7   5   0 28.7460 1.94199   5
   7   5   0 26.2132 1.84138   8
   7   5   0 31.1701 2.37065   2
   7   5   0 26.7137 1.67375   7
  -9  -5   0 1388.36 60.8369   8
  -9  -5   0 1422.70 60.9394   2
  -9  -5   0 1454.97 61.0251   2
   9  -5   0 1402.95 60.9772   2
   9  -5   0 1433.19 60.9504   2
  -9  -5   0 1418.70 60.7529   7
   9  -5   0 1440.32 60.8807   6
   9  -5   0 1420.40 60.7918   4
  -9   5   0 1426.69 60.5889   3
  -9   5   0 1400.84 60.7422   4
  -9   5   0 1420.21 60.7639   9
   9   5   0 1400.29 60.8263   8
  -9   5   0 1412.85 60.8185   6
  -9   5   0 1414.33 60.9310   2
   9   5   0 1436.52 61.0307   2
   9   5   0 1361.46 60.8559   3
   9   5   0 1406.70 60.6467   9
   9   5   0 1448.48 61.0000   2
  -9   5   0 1358.71 60.9841   2
  -9   5   0 1427.25 60.6656   9
   9   5   0 1355.49 60.6953   7
  11  -5   0 165.936 7.38422   5
  11  -5   0 172.473 7.97640   2
 -11  -5   0 158.872 7.61344   8
 -11  -5   0 162.490 7.86089   2
  11  -5   0 165.397 7.67122   6
  11  -5   0 168.496 7.59539   4
 -11  -5   0 166.653 8.06860   2
  11  -5   0 170.106 7.93478   2
 -11  -5   0 165.845 7.53769   7
 -11   5   0 166.196 7.63107   6
  11   5   0 173.444 8.13426   2
 -11   5   0 173.665 7.94673   2
 -11   5   0 166.066 7.43948   9
  11   5   0 166.321 8.09418   2
 -11   5   0 170.941 7.51282   9
  11   5   0 147.947 7.43910   9
 -11   5   0 168.891 7.49859   4
  11   5   0 170.864 7.45746   7
 -11   5   0 170.067 8.17631   2
 -11   5   0 167.719 7.26107   3
  11   5   0 164.328 7.63196   8
 -13  -5   0 48.4717 3.99505   2
 -13  -5   0 58.5232 3.11302   8
  13  -5   0 57.3840 3.76488   2
 -13  -5   0 52.2303 3.03040   7
 -13  -5   0 54.6877 3.62911   2
  13  -5   0 48.4006 3.72145   2
  13  -5   0 54.0257 3.18320   6
  13  -5   0 59.6103 3.15097   4
 -13   5   0 57.2106 2.94628   4
  13   5   0 54.8264 4.21573   2
 -13   5   0 54.5632 4.35971   2
  13   5   0 60.7076 3.04276   9
 -13   5   0 52.6155 3.16315   9
  13   5   0 52.6212 2.85951   7
  13   5   0 64.5778 4.21489   2
 -13   5   0 54.3842 3.18248   6
  13   5   0 52.1718 3.09329   3
 -13   5   0 54.7590 2.94990   9
 -13   5   0 56.5210 2.87435   8
  13   5   0 54.9615 2.85607   6
  13   5   0 58.2846 3.13689   4
 -13   5   0 54.9639 2.55454   3
  13   5   0 58.5068 3.17610   8
 -13   5   0 55.9764 3.78794   2
 -15  -5   0 369.059 16.6975   7
 -15  -5   0 366.148 17.1481   2
 -15  -5   0 368.645 16.4590   9
  15  -5   0 336.648 16.4684   3
  15  -5   0 371.544 16.4286   9
  15  -5   0 378.680 16.4255   9
 -15  -5   0 365.393 16.4497   9
  15  -5   0 393.476 17.2664   2
 -15  -5   0 397.896 17.4261   2
  15  -5   0 373.481 17.2662   2
  15  -5   0 390.606 16.7739   4
  15  -5   0 379.756 16.8617   6
 -15  -5   0 375.666 16.8175   8
  15   5   0 360.187 17.8613   2
  15   5   0 388.597 16.7916   4
 -15   5   0 373.092 16.8013   6
  15   5   0 408.105 16.7361   9
  15   5   0 375.555 16.6105   7
 -15   5   0 386.711 16.6635   9
 -15   5   0 380.021 16.6671   4
  15   5   0 414.865 17.4823   2
  15   5   0 384.705 16.6223   6
  15   5   0 396.917 16.8518   8
 -15   5   0 369.214 16.6272   8
  15   5   0 385.707 16.8198   9
 -15   5   0 388.204 16.4063   3
 -15   5   0 395.583 17.2288   2
 -15   5   0 367.648 17.0498   9
  15   5   0 373.042 16.8048   3
 -17  -5   0 2.81734 1.15765   8
 -17  -5   0 1.72815 0.70109   9
  17  -5   0 2.24703 1.07698   6
 -17  -5   0 2.40745 1.16047   7
  17  -5   0 2.44187 0.73758   9
  17  -5   0 2.94640 0.73552   9
  17  -5   0 2.22838 1.70193   2
 -17  -5   0 1.07500 1.58173   2
 -17  -5   0 3.77773 0.84648   9
  17  -5   0 1.75255 1.21612   4
  17  -5   0 2.47850 1.88566   2
  17  -5   0 1.08958 0.61939   3
 -17   5   0 4.18623 1.35416   6
 -17   5   0 1.54828 1.04113   9
  17   5   0 1.66411 0.86513   7
 -17   5   0 2.59690 1.87344   2
 -17   5   0 3.74539 0.63138   3
  17   5   0 2.26986 0.84559   6
  17   5   0 2.18263 1.27656   8
  17   5   0 2.96513 1.06469   9
  17   5   0 2.91648 1.12279   3
  17   5   0 3.24459 2.42690   2
  17   5   0 0.46552 2.00653   2
 -17   5   0 2.90487 2.53880   2
  17   5   0 0.92404 1.13057   4
  17   5   0 3.60235 1.13856   9
 -17   5   0 2.31996 0.92051   4
 -17   5   0 3.04262 0.98163   8
 -19  -5   0 28.7463 2.06601   9
 -19  -5   0 30.1707 2.34048   9
  19  -5   0 32.7026 2.70653   6
 -19  -5   0 23.4498 2.48897   8
  19  -5   0 29.0963 1.82341   3
  19  -5   0 32.5607 3.98995   2
  19  -5   0 29.3887 2.87266   4
 -19  -5   0 28.4874 2.69448   7
  19  -5   0 31.6771 2.19318   9
  19  -5   0 32.8041 2.15330   9
 -19  -5   0 29.2047 3.68603   2
 -19   5   0 26.1840 2.97226   7
 -19   5   0 29.4848 1.83621   3
 -19   5   0 20.4444 4.05068   9
  19   5   0 30.4727 2.87820   9
  19   5   0 35.2618 4.59067   2
 -19   5   0 22.5641 3.91969   2
 -19   5   0 28.0413 2.64287   9
 -19   5   0 31.5193 2.95116   6
  19   5   0 29.8090 2.78499   4
  19   5   0 28.5911 2.24463   6
 -19   5   0 31.5116 2.35203   4
  19   5   0 30.8664 2.55883   3
  19   5   0 27.4029 5.26894   2
  19   5   0 29.0711 2.69268   9
 -19   5   0 30.0790 2.26446   8
  19   5   0 31.6834 2.31732   7
 -19   5   0 32.7014 5.71383   2
  19   5   0 28.3469 2.92097   8
 -21  -5   0 177.927 8.79310   8
 -21  -5   0 166.326 8.52312   9
  21  -5   0 187.008 8.88588   6
  21  -5   0 183.070 9.79569   2
  21  -5   0 186.631 8.88580   4
 -21  -5   0 196.457 10.3608   2
 -21  -5   0 180.583 8.77763   7
  21  -5   0 186.282 8.51814   9
 -21  -5   0 197.122 9.68666   2
 -21  -5   0 183.445 8.44007   9
  21  -5   0 191.395 8.49041   9
  21  -5   0 185.580 8.25665   3
 -21   5   0 191.386 8.99686   7
  21   5   0 186.578 8.55728   7
  21   5   0 175.718 10.1327   2
  21   5   0 179.729 8.79053   9
  21   5   0 189.070 10.6429   2
  21   5   0 187.492 8.88296   9
 -21   5   0 185.612 8.73499   9
  21   5   0 190.212 8.76933   3
 -21   5   0 177.423 8.55261   8
 -21   5   0 196.747 9.02768   9
  21   5   0 182.484 8.86217   4
  21   5   0 178.913 8.93859   8
  21   5   0 184.709 8.53771   6
 -21   5   0 191.257 8.27146   3
 -21   5   0 189.187 10.9768   2
 -21   5   0 186.189 8.60295   4
 -21   5   0 183.801 8.90257   6
 -21   5   0 183.287 9.76895   2
  23  -5   0 1.06824 0.87393   3
 -23  -5   0 1.22788 2.27758   2
  23  -5   0 -0.9481 2.71254   2
  23  -5   0 1.25515 1.74032   4
 -23  -5   0 0.47660 1.28611   9
  23  -5   0 -1.0642 1.12378   9
 -23  -5   0 0.69153 1.05596   9
 -23  -5   0 3.66811 1.48427   8
 -23  -5   0 2.19842 3.32684   2
  23  -5   0 -0.0013 2.37186   2
 -23  -5   0 1.38578 1.67117   7
  23  -5   0 0.33377 1.43465   6
 -23   5   0 -2.0601 2.42972   2
  23   5   0 1.69216 1.19844   3
  23   5   0 1.68805 1.27862   7
 -23   5   0 1.44638 1.21054   8
  23   5   0 2.53813 1.90979   8
  23   5   0 -0.0339 2.96243   2
 -23   5   0 2.69033 1.98694   7
 -23   5   0 0.71157 1.70368   9
 -23   5   0 -0.1260 1.26338   4
 -23   5   0 1.63530 1.49365   9
  23   5   0 -0.1990 1.61261   9
  23   5   0 0.85225 1.68976   9
 -23   5   0 0.03398 1.79332   6
  23   5   0 2.00150 1.20809   6
  23   5   0 -0.5836 1.75280   4
 -23   5   0 1.82601 0.99000   3
  25  -5   0 13.3272 3.69447   2
  25  -5   0 5.46488 1.48029   9
 -25  -5   0 7.00723 1.36746   9
 -25  -5   0 3.84667 1.61862   9
  25  -5   0 7.05092 1.79399   6
  25  -5   0 5.97118 2.15822   4
  25  -5   0 7.95971 1.71013   3
 -25  -5   0 6.22114 2.73405   2
 -25  -5   0 8.18911 2.12111   7
 -25  -5   0 15.9150 4.11040   2
 -25  -5   0 9.52260 1.83845   8
  25  -5   0 9.76640 2.88092   2
  25   5   0 2.82483 1.93590   9
  25   5   0 8.90213 1.71754   3
  25   5   0 6.41104 1.90916   9
 -25   5   0 4.95949 1.80689   9
 -25   5   0 8.50723 2.99068   2
 -25   5   0 8.50769 1.77408   8
  25   5   0 8.62672 3.45779   2
 -25   5   0 6.36386 2.26857   7
 -25   5   0 7.39654 1.98279   3
  25   5   0 8.72176 2.36032   8
  25   5   0 8.31491 2.17306   4
 -25   5   0 4.63450 2.09600   9
 -25   5   0 7.46107 2.21364   6
  25   5   0 8.62864 1.81202   6
 -25   5   0 10.9773 2.47863   4
  25   5   0 7.51813 1.80547   7
  27  -5   0 147.410 7.61126   6
  27  -5   0 146.690 7.20879   9
  27  -5   0 134.218 8.11778   4
  27  -5   0 143.259 9.95688   2
 -27  -5   0 151.987 7.13822   9
  27  -5   0 137.561 7.27008   9
  27  -5   0 141.655 6.74698   3
  27  -5   0 151.245 9.41477   2
 -27  -5   0 154.603 7.91334   7
 -27  -5   0 144.274 7.52273   8
 -27  -5   0 160.914 10.9959   2
  27   5   0 139.233 8.09599   8
  27   5   0 139.815 7.84005   9
 -27   5   0 145.800 7.95013   6
  27   5   0 138.425 7.22381   7
 -27   5   0 135.383 7.98283   9
 -27   5   0 150.041 7.29649   4
  27   5   0 141.351 7.37406   3
 -27   5   0 144.739 8.11198   7
 -27   5   0 151.551 7.64016   9
 -27   5   0 149.505 7.24133   8
  27   5   0 144.885 7.20891   6
 -27   5   0 139.327 6.86657   3
  27   5   0 145.508 7.97632   4
  27   5   0 150.812 7.75212   9
 -27   5   0 132.159 9.29648   2
  27   5   0 140.731 10.0932   2
  29  -5   0 11.0976 3.13504   9
 -29  -5   0 8.09652 2.07224   9
  29  -5   0 12.1760 2.20291   3
  29  -5   0 8.43699 2.01254   6
  29  -5   0 5.14183 2.76822   4
  29  -5   0 14.1111 3.26619   9
 -29  -5   0 9.23562 1.76185   9
 -29  -5   0 15.3975 5.54519   2
 -29  -5   0 10.0351 2.15563   8
 -29  -5   0 5.29427 3.12927   2
  29  -5   0 12.5467 3.82543   2
 -29  -5   0 12.7900 3.69539   7
  29  -5   0 9.98936 4.47109   2
 -29   5   0 14.2558 3.05011   4
 -29   5   0 4.83818 2.70122   9
  29   5   0 14.9257 4.26135   9
 -29   5   0 4.84504 3.67778   2
  29   5   0 11.7099 2.06731   3
  29   5   0 10.7408 2.53033   9
 -29   5   0 14.1918 2.96265   8
  29   5   0 14.5590 3.10954   7
 -29   5   0 8.59159 1.73941   3
  29   5   0 11.0035 4.34950   2
 -29   5   0 15.7024 4.18748   9
  29   5   0 13.1483 2.94142   6
 -31  -5   0 231.618 15.6243   2
  31  -5   0 228.077 10.4044   3
 -31  -5   0 238.514 11.0647   9
 -31  -5   0 231.114 11.2449   8
  31  -5   0 216.424 13.3218   2
  31  -5   0 227.169 10.9039   9
 -31  -5   0 222.386 12.9093   2
 -31  -5   0 222.341 10.8128   9
  31  -5   0 220.837 10.9876   9
  31  -5   0 224.401 14.3671   2
 -31  -5   0 236.173 11.7961   7
  31  -5   0 232.962 11.8678   4
  31  -5   0 231.744 11.3402   6
  31   5   0 221.979 10.9945   3
 -31   5   0 226.051 10.9255   8
  31   5   0 218.577 11.5316   9
  31   5   0 232.254 10.9373   6
 -31   5   0 230.746 10.9618   4
 -31   5   0 227.762 10.6242   3
 -31   5   0 227.856 11.4146   9
  31   5   0 226.266 16.9289   2
  31   5   0 235.410 11.6876   9
  31   5   0 231.166 10.9674   7
 -31   5   0 219.942 13.3637   2
 -31   5   0 229.107 11.7370   9
  33  -5   0 41.6735 10.5550   2
 -33  -5   0 39.0929 4.12929   9
 -33  -5   0 47.8640 7.58190   2
 -33  -5   0 44.9861 4.72180   9
 -33  -5   0 26.9060 6.44202   7
  33  -5   0 42.5104 4.58947   9
 -33  -5   0 43.2351 4.61113   8
  33  -5   0 40.2255 3.37061   3
  33  -5   0 44.9803 4.42966   9
  33  -5   0 38.8810 4.78343   6
  33  -5   0 52.3971 8.36150   2
 -33  -5   0 25.5516 7.85209   2
  33   5   0 37.4447 5.84941   9
 -33   5   0 43.0608 6.29367   9
 -33   5   0 27.0675 4.15690   4
  33   5   0 34.6484 5.97662   9
  33   5   0 41.6556 4.26183   6
  33   5   0 38.0035 9.88821   2
  33   5   0 46.2494 4.31807   3
 -33   5   0 43.6188 5.53404   9
 -33   5   0 39.6371 4.13331   8
 -35  -5   0 8.16096 2.31181   9
  35  -5   0 7.43011 5.07997   2
 -35  -5   0 15.4837 8.47274   2
  35  -5   0 6.47122 2.81657   6
  35  -5   0 7.33862 2.49631   9
  35  -5   0 2.11484 6.65418   2
 -35  -5   0 5.27936 2.54708   8
 -35  -5   0 10.7051 4.14687   2
  35  -5   0 11.5594 2.64384   9
 -35  -5   0 7.47280 2.81613   9
  35  -5   0 7.45930 1.89889   3
  35   5   0 9.09045 5.76491   2
 -35   5   0 6.74368 3.05726   9
  35   5   0 9.44226 3.42925   9
  35   5   0 6.80541 3.35908   9
  35   5   0 8.42277 2.42146   6
 -35   5   0 11.5705 2.61318   8
 -35   5   0 8.70516 3.76122   9
 -35   5   0 4.53469 2.34946   4
 -35   5   0 5.92499 5.16877   2
  35   5   0 6.34469 2.30632   3
  37  -5   0 20.9811 5.05247   9
  37  -5   0 9.78553 8.25730   2
  37  -5   0 15.3492 5.67561   2
 -37  -5   0 26.4264 5.37206   9
  37  -5   0 18.9523 3.52116   3
  37  -5   0 17.6409 4.79183   9
 -37  -5   0 20.9465 4.43316   9
 -37  -5   0 15.1991 5.07542   2
 -37  -5   0 18.0853 9.78938   2
 -37   5   0 18.2059 4.62204   4
 -37   5   0 5.61864 5.44407   2
 -37   5   0 17.6683 4.30294   9
  37   5   0 14.6259 3.91247   9
  37   5   0 13.9880 2.83975   3
  37   5   0 11.9913 2.82435   6
 -37   5   0 19.7576 4.45484   8
 -37   5   0 14.8959 3.63298   9
  37   5   0 25.8576 6.62495   2
  37   5   0 20.0225 4.02977   9
  39  -5   0 26.2061 5.55477   9
 -39  -5   0 23.9320 5.09381   9
  39  -5   0 24.4626 6.02172   6
  39  -5   0 18.8309 3.91263   3
 -39  -5   0 13.9692 3.32224   8
  39  -5   0 25.4884 5.68312   9
 -39  -5   0 16.8517 11.4236   2
  39  -5   0 20.0138 5.95959   2
 -39  -5   0 16.4107 5.89946   2
  39  -5   0 21.2446 9.76966   2
 -39  -5   0 17.2804 3.67590   9
  39   5   0 28.3774 7.92268   9
  39   5   0 25.9694 4.95363   3
 -39   5   0 12.8105 3.10723   4
 -39   5   0 23.5148 3.47572   8
  39   5   0 15.7640 7.59921   2
 -39   5   0 16.9490 6.51912   2
 -39   5   0 11.6672 4.01919   9
 -39   5   0 30.1301 8.42841   9
  39   5   0 12.6185 4.38299   9
  39   5   0 11.9789 3.16112   6
  41  -5   0 64.3719 12.9521   2
  41  -5   0 57.8918 6.89154   9
 -41  -5   0 54.9727 6.82263   8
 -41  -5   0 59.9784 11.4721   2
 -41  -5   0 63.8465 7.50183   9
  41  -5   0 65.8090 6.71521   9
 -41  -5   0 42.9964 6.13416   9
  41  -5   0 55.8217 5.05250   3
 -41  -5   0 25.1988 13.6611   2
  41  -5   0 57.8059 7.14435   6
  41  -5   0 46.4482 11.2045   2
 -41   5   0 69.8781 6.46697   4
 -41   5   0 57.8448 6.27254   8
  41   5   0 44.3444 10.1322   2
  41   5   0 57.2253 6.16239   3
 -41   5   0 43.5328 9.81849   9
 -41   5   0 47.0876 8.58795   9
 -41   5   0 64.3584 13.3218   2
  41   5   0 67.3496 9.31417   9
  41   5   0 46.9141 9.62169   9
  41   5   0 53.0806 7.23554   6
  43  -5   0 51.8737 7.86875   6
 -43  -5   0 49.6259 12.5148   2
 -43  -5   0 42.9522 8.05643   9
  43  -5   0 53.6302 5.47572   3
 -43  -5   0 52.1417 7.32446   8
  43  -5   0 50.5164 14.1269   2
  43  -5   0 45.8749 7.17851   9
 -43  -5   0 49.0706 6.56641   9
  43   5   0 50.1021 6.97302   6
 -43   5   0 43.4313 6.64862   8
 -43   5   0 43.6477 10.1024   2
 -43   5   0 32.7481 9.36223   9
  43   5   0 58.5575 6.44918   3
 -43   5   0 39.3811 6.77731   4
  43   5   0 50.6731 11.3710   2
  43   5   0 42.3989 10.4026   9
  45  -5   0 -2.2034 3.26270   3
  45  -5   0 9.41862 4.71862   9
 -45  -5   0 6.10220 7.56067   2
 -45  -5   0 4.42066 4.60123   8
  45  -5   0 5.44423 4.65221   6
 -45  -5   0 9.25770 3.79986   9
 -45  -5   0 8.34262 5.07060   9
  45  -5   0 17.7798 11.5783   2
  45  -5   0 7.28507 4.26688   9
  45   5   0 13.7939 3.97010   3
 -45   5   0 14.6175 4.26441   4
 -45   5   0 2.00430 6.61493   9
  45   5   0 13.5821 4.24937   6
 -45   5   0 12.7723 4.24027   8
  45   5   0 6.09785 11.4369   2
 -45   5   0 2.56257 9.22436   2
 -45   5   0 14.9568 6.02138   9
  45   5   0 6.05209 6.43174   9
  45   5   0 1.47066 6.05839   9
 -47  -5   0 58.2256 9.61473   9
 -47  -5   0 46.4812 9.98734   2
 -47  -5   0 58.3054 8.15465   9
  47  -5   0 39.5272 10.2772   2
  47  -5   0 66.8170 8.88739   9
 -47  -5   0 71.2373 9.10620   8
  47  -5   0 62.5019 9.67338   6
  47  -5   0 47.8903 8.77243   9
  47   5   0 56.4029 8.88536   6
 -47   5   0 51.5214 13.8237   9
 -47   5   0 61.4961 8.37311   8
  47   5   0 54.5190 14.4510   2
  47   5   0 58.0932 7.83645   3
  47   5   0 42.6752 8.14559   9
 -47   5   0 33.5043 11.1570   2
 -49  -5   0 19.0753 6.10542   9
  49  -5   0 23.1952 8.30305   6
  49  -5   0 24.3035 5.38200   9
 -49  -5   0 18.1015 5.02106   9
  49  -5   0 16.8446 5.22150   9
 -49  -5   0 24.4809 8.63375   8
 -49  -5   0 8.41741 10.0828   2
  49  -5   0 42.0236 11.9559   2
  49   5   0 34.0571 8.08222   3
  49   5   0 15.3039 5.58132   6
 -49   5   0 24.2871 5.64994   8
  51  -5   0 146.014 12.8887   9
  51  -5   0 150.971 12.6109   9
 -51  -5   0 147.083 13.2730   8
  51  -5   0 171.231 14.2626   6
  51  -5   0 157.268 24.8999   2
 -51  -5   0 145.116 21.9907   2
 -51  -5   0 147.187 12.1328   9
 -51  -5   0 161.672 13.4561   9
 -51   5   0 171.576 12.7275   8
  51   5   0 153.182 13.0348   6
  51   5   0 141.707 11.6100   3
   0  -6   0 172.951 7.93313   6
   0  -6   0 170.179 7.88315   8
   0   6   0 177.977 7.91730   3
   0   6   0 171.504 7.83211   5
   0   6   0 180.512 7.87554   8
   0   6   0 181.109 7.94078   6
   0   6   0 185.279 7.94308   7
   2  -6   0 122.940 5.65969   5
   2  -6   0 121.179 5.87905   6
  -2  -6   0 130.821 5.82770   8
   2   6   0 130.116 5.86608   3
  -2   6   0 132.505 5.69428   5
  -2   6   0 125.324 5.85486   6
   2   6   0 124.475 5.78951   8
   2   6   0 139.487 5.81516   5
   2   6   0 125.492 5.81282   7
  -2   6   0 122.393 5.83427   4
  -2   6   0 128.446 5.76777   8
   2   6   0 127.567 5.84077   6
   4  -6   0 1253.40 58.8990   2
   4  -6   0 1391.00 59.1030   6
   4  -6   0 1374.02 58.8821   5
  -4  -6   0 1412.13 58.9601   2
  -4  -6   0 1377.95 59.0632   8
  -4  -6   0 1376.49 58.9348   2
   4  -6   0 1377.37 58.9338   2
   4   6   0 1472.98 58.9736   2
  -4   6   0 1368.46 58.9096   2
   4   6   0 1414.65 59.0342   6
  -4   6   0 1369.97 58.9279   2
   4   6   0 1338.41 59.0340   5
   4   6   0 1365.83 59.0357   8
  -4   6   0 1395.46 59.0415   4
   4   6   0 1339.84 59.0910   3
  -4   6   0 1384.96 58.8846   5
   4   6   0 1361.09 59.0041   7
   4   6   0 1278.11 58.9608   2
  -4   6   0 1386.24 58.9856   8
  -4   6   0 1392.72 59.0602   6
   6  -6   0 269.907 12.0238   6
   6  -6   0 293.966 11.9800   2
   6  -6   0 261.677 11.9102   2
   6  -6   0 262.429 11.9514   4
  -6  -6   0 252.297 11.9049   2
  -6  -6   0 269.435 11.9667   8
   6  -6   0 265.675 11.7324   5
  -6  -6   0 265.273 11.8931   7
  -6   6   0 271.937 11.9095   4
  -6   6   0 289.614 11.9441   2
   6   6   0 275.416 11.9564   8
   6   6   0 269.070 11.8628   7
   6   6   0 261.079 11.9979   3
  -6   6   0 268.587 11.7100   5
   6   6   0 270.046 12.0175   2
   6   6   0 267.252 12.0393   2
  -6   6   0 269.734 11.9695   6
  -6   6   0 279.200 12.0149   2
   6   6   0 273.300 11.9832   5
   8  -6   0 1659.03 70.9680   2
  -8  -6   0 1596.77 70.9639   2
   8  -6   0 1620.54 70.9849   6
  -8  -6   0 1560.15 71.0151   2
   8  -6   0 1653.80 70.7231   5
  -8  -6   0 1665.58 70.8628   7
   8  -6   0 1678.72 70.9195   4
   8  -6   0 1604.94 70.9875   2
  -8  -6   0 1592.19 70.9406   8
   8   6   0 1672.78 70.9674   5
   8   6   0 1603.60 70.9200   8
   8   6   0 1711.64 71.0604   2
   8   6   0 1613.90 70.8109   7
  -8   6   0 1675.45 70.8618   4
  -8   6   0 1743.19 71.0404   2
   8   6   0 1617.49 70.9790   3
   8   6   0 1845.90 71.0630   2
  -8   6   0 1732.73 70.9849   2
  -8   6   0 1452.42 71.0777   6
 -10  -6   0 1154.06 49.6824   8
  10  -6   0 1160.86 49.8131   2
  10  -6   0 1150.83 49.6250   4
  10  -6   0 1127.38 49.7101   6
  10  -6   0 1248.45 49.8149   2
 -10  -6   0 1119.21 49.8500   2
  10  -6   0 1136.00 49.4335   5
 -10  -6   0 1100.43 49.7489   2
 -10  -6   0 1159.86 49.5751   7
 -10   6   0 1169.23 49.5635   4
  10   6   0 1132.09 49.7014   3
  10   6   0 1019.90 50.5965   2
  10   6   0 1112.30 49.8262   2
  10   6   0 1171.57 49.4402   9
  10   6   0 1193.36 49.6771   8
  10   6   0 1138.21 49.5091   7
 -10   6   0 1186.17 49.7884   2
 -10   6   0 1114.61 49.8450   2
 -10   6   0 1154.00 49.4189   9
  10   6   0 1174.61 49.4305   9
 -10   6   0 1165.49 49.4407   9
 -10   6   0 1156.76 49.3819   3
  10   6   0 1176.95 49.7150   5
 -10   6   0 1166.19 49.6551   6
  12  -6   0 25.4669 2.21588   4
 -12  -6   0 25.4414 2.09938   7
 -12  -6   0 27.8817 2.12861   8
  12  -6   0 26.8176 2.75827   2
  12  -6   0 26.8857 2.85500   2
 -12  -6   0 29.1783 3.20227   2
 -12  -6   0 22.9647 2.58685   2
  12  -6   0 28.8463 1.71112   5
  12  -6   0 24.1906 2.25679   6
 -12   6   0 25.6091 4.95712   2
  12   6   0 21.9868 3.25507   2
 -12   6   0 29.0405 1.46023   3
  12   6   0 29.0966 2.28418   8
 -12   6   0 25.4407 2.30564   6
  12   6   0 31.5205 5.07872   2
 -12   6   0 27.5734 1.94043   4
  12   6   0 25.1111 1.94315   9
 -12   6   0 25.7146 1.92244   9
 -12   6   0 30.0157 2.04270   9
 -12   6   0 25.2621 2.90800   2
  12   6   0 27.3935 2.14134   3
  12   6   0 28.4158 1.88043   7
  12   6   0 27.3731 1.86739   9
  14  -6   0 135.743 6.16555   5
  14  -6   0 127.543 6.96238   2
 -14  -6   0 137.806 6.88440   2
 -14  -6   0 134.899 6.48762   8
 -14  -6   0 140.495 6.42738   7
 -14  -6   0 137.460 7.27392   2
  14  -6   0 130.532 6.47837   4
  14  -6   0 130.285 6.99962   2
  14  -6   0 126.330 6.54607   6
 -14   6   0 136.448 6.38055   9
  14   6   0 145.223 6.25068   6
 -14   6   0 148.277 7.61065   2
  14   6   0 132.450 6.47984   4
 -14   6   0 135.532 6.31073   4
  14   6   0 134.641 6.49986   3
  14   6   0 143.227 6.35364   9
  14   6   0 145.341 6.56989   8
  14   6   0 132.101 6.23458   7
 -14   6   0 142.727 6.56875   6
 -14   6   0 132.000 7.01233   2
 -14   6   0 135.642 6.28844   9
 -14   6   0 133.937 6.24085   8
  14   6   0 133.107 7.30846   2
  14   6   0 136.455 6.29166   9
 -14   6   0 132.491 5.95333   3
  14   6   0 123.961 7.35879   2
 -16  -6   0 308.507 13.7645   2
  16  -6   0 295.331 13.4128   6
  16  -6   0 284.201 13.2872   4
  16  -6   0 303.107 13.0468   5
  16  -6   0 291.722 13.8320   2
 -16  -6   0 305.152 13.2440   7
 -16  -6   0 294.876 13.3465   8
 -16  -6   0 276.884 13.9926   2
  16  -6   0 292.648 13.8302   2
 -16   6   0 305.628 14.3054   2
 -16   6   0 307.469 12.8306   3
 -16   6   0 303.417 13.8397   2
 -16   6   0 299.686 13.3571   6
  16   6   0 284.250 14.1214   2
  16   6   0 295.364 13.3332   4
 -16   6   0 305.059 13.2324   9
 -16   6   0 311.566 13.1287   8
  16   6   0 274.210 13.9969   2
 -16   6   0 316.932 13.1850   9
  16   6   0 287.125 13.0872   6
  16   6   0 300.849 13.1626   9
 -16   6   0 301.982 13.1578   4
  16   6   0 288.733 13.3354   3
  16   6   0 292.858 13.0918   7
  16   6   0 281.318 13.3546   8
  16   6   0 285.481 13.1932   9
 -18  -6   0 109.357 4.65225   9
  18  -6   0 101.001 6.23439   2
 -18  -6   0 92.6735 5.99873   2
 -18  -6   0 101.317 5.29947   7
  18  -6   0 106.349 5.46103   4
  18  -6   0 101.529 5.51889   6
 -18  -6   0 102.309 5.36089   8
 -18  -6   0 92.5957 6.73410   2
  18  -6   0 103.459 6.35723   2
  18   6   0 101.168 5.03417   7
 -18   6   0 103.273 4.64797   3
  18   6   0 98.8375 5.43674   4
  18   6   0 100.358 7.21109   2
  18   6   0 111.579 5.35752   3
  18   6   0 110.159 5.57164   8
 -18   6   0 100.663 5.09843   4
 -18   6   0 103.792 5.51385   6
 -18   6   0 103.206 6.31926   2
  18   6   0 100.178 5.25511   9
 -18   6   0 99.3929 5.02906   8
 -18   6   0 102.169 5.23006   9
 -18   6   0 107.636 5.37890   9
  18   6   0 110.486 6.78861   2
  18   6   0 107.647 5.04112   6
  18   6   0 100.354 5.33470   9
 -18   6   0 101.675 7.46979   2
  20  -6   0 -0.1215 0.71178   9
 -20  -6   0 -1.7591 1.87493   2
 -20  -6   0 -0.7211 1.43261   7
 -20  -6   0 0.38471 1.30315   8
  20  -6   0 0.86169 1.54613   4
 -20  -6   0 0.79334 0.81406   9
  20  -6   0 0.86654 1.40659   6
 -20  -6   0 0.39512 0.71769   9
  20  -6   0 -0.3350 0.73153   3
  20  -6   0 1.73219 2.16164   2
 -20  -6   0 0.29777 2.75822   2
  20  -6   0 -0.0985 0.66791   9
  20  -6   0 -2.0010 2.29389   2
 -20   6   0 0.52733 1.50016   9
  20   6   0 2.50526 1.37721   9
  20   6   0 0.24295 1.70145   8
  20   6   0 0.77762 2.60342   2
 -20   6   0 0.95736 1.60306   7
 -20   6   0 0.73268 1.08068   8
 -20   6   0 -1.1457 1.08917   4
 -20   6   0 -0.4865 0.68630   3
  20   6   0 -1.7834 1.45094   4
  20   6   0 0.99423 1.05151   7
  20   6   0 2.54436 1.30864   3
 -20   6   0 1.26687 1.64394   6
  20   6   0 -1.5596 0.98196   6
 -20   6   0 -0.4855 2.20951   2
 -20   6   0 0.43141 1.35580   9
 -22  -6   0 0.90827 1.38406   8
  22  -6   0 0.22350 0.91001   9
  22  -6   0 1.25133 0.92796   9
 -22  -6   0 0.19377 0.97737   9
  22  -6   0 -0.3666 1.41691   6
  22  -6   0 -1.5536 0.80610   3
 -22  -6   0 -0.0127 0.90231   9
  22  -6   0 0.46396 3.20866   2
 -22  -6   0 -1.8467 2.09111   2
 -22  -6   0 1.02598 1.69113   7
  22  -6   0 0.93309 2.45010   2
  22  -6   0 0.64662 1.77517   4
  22  -6   0 0.49584 0.91966   9
 -22   6   0 -1.6003 1.81407   7
  22   6   0 0.64415 1.11180   6
 -22   6   0 1.38349 1.70701   9
  22   6   0 -0.9070 1.59553   9
  22   6   0 -0.1191 1.76720   8
 -22   6   0 2.86052 2.62718   2
  22   6   0 1.57678 1.61410   9
  22   6   0 -0.5365 1.70592   4
 -22   6   0 -0.8723 1.19054   4
 -22   6   0 -0.9015 1.70170   9
  22   6   0 0.25916 1.22865   3
 -22   6   0 2.44329 1.82398   6
  22   6   0 -1.3248 2.79531   2
 -22   6   0 0.03958 0.82515   3
  22   6   0 0.84011 1.19549   7
 -22   6   0 1.66639 1.27899   8
 -24  -6   0 2.09686 1.96032   7
 -24  -6   0 2.56875 1.12876   9
  24  -6   0 3.17083 2.08415   4
  24  -6   0 1.70950 2.76060   2
  24  -6   0 2.13331 1.11902   9
  24  -6   0 3.08600 1.75077   6
 -24  -6   0 4.08656 3.72644   2
  24  -6   0 1.83330 0.96862   3
  24  -6   0 3.63351 1.18099   9
 -24  -6   0 0.20613 1.56514   8
 -24  -6   0 3.18190 1.30843   9
  24   6   0 0.96095 1.32562   7
 -24   6   0 2.09374 1.36737   4
 -24   6   0 2.57744 2.13006   7
  24   6   0 0.86370 1.28311   6
 -24   6   0 2.32306 1.36788   8
 -24   6   0 1.43782 0.99681   3
  24   6   0 3.74263 2.09910   8
 -24   6   0 2.30294 2.11836   6
 -24   6   0 2.41671 2.03393   9
 -24   6   0 -0.5225 2.81796   2
  24   6   0 1.39901 2.04625   4
  24   6   0 3.68329 1.46213   3
  24   6   0 0.30392 1.86296   9
  24   6   0 5.03356 1.98837   9
 -24   6   0 4.50420 2.16618   9
  24   6   0 2.65276 3.47448   2
 -26  -6   0 22.1064 2.48740   9
 -26  -6   0 14.8875 2.70367   9
  26  -6   0 18.6363 2.07611   3
 -26  -6   0 22.2769 4.13987   7
  26  -6   0 24.1570 2.67583   9
  26  -6   0 18.1815 4.03237   2
 -26  -6   0 18.9829 5.07940   2
 -26  -6   0 19.2701 3.09533   8
  26  -6   0 20.9354 3.51474   6
  26  -6   0 19.3223 4.30135   4
  26  -6   0 23.8789 5.53214   2
 -26  -6   0 17.0254 4.71046   2
  26  -6   0 18.5575 2.59488   9
 -26   6   0 21.1196 2.20262   3
 -26   6   0 17.7307 2.71671   8
 -26   6   0 20.2003 2.85111   4
  26   6   0 22.9820 2.82399   6
 -26   6   0 16.2473 2.80880   6
  26   6   0 13.6097 2.58973   4
 -26   6   0 20.4675 5.79051   2
  26   6   0 18.6534 4.00545   9
 -26   6   0 19.6428 3.75787   9
  26   6   0 17.5179 4.07805   9
  26   6   0 16.3818 4.01762   2
  26   6   0 23.3208 4.40097   8
  26   6   0 20.9301 2.83894   7
 -26   6   0 21.1834 4.38334   7
  26   6   0 23.2001 3.07688   3
 -26   6   0 21.1600 4.38273   9
 -28  -6   0 90.0901 5.17804   9
  28  -6   0 82.8659 4.58173   3
  28  -6   0 85.6191 8.68264   2
  28  -6   0 94.2454 7.92346   2
 -28  -6   0 89.9770 7.42669   2
 -28  -6   0 97.3027 4.95222   9
  28  -6   0 92.1040 5.02834   9
 -28  -6   0 91.1848 10.0572   2
 -28  -6   0 84.1684 6.28347   7
  28  -6   0 83.9526 5.08695   9
  28  -6   0 92.2140 5.83032   6
  28  -6   0 87.6931 6.52594   4
 -28  -6   0 100.583 5.67832   8
  28   6   0 95.5118 5.27572   7
 -28   6   0 84.9697 4.67549   3
  28   6   0 86.7804 5.17084   6
 -28   6   0 87.3280 8.06986   2
  28   6   0 81.7350 5.35963   3
 -28   6   0 88.3560 6.02602   9
 -28   6   0 93.8471 6.59922   9
  28   6   0 80.7017 6.27063   9
 -28   6   0 95.2507 5.24185   8
  28   6   0 86.7519 6.05872   9
 -28   6   0 87.5245 5.24196   4
  28   6   0 83.7271 9.07293   2
 -30  -6   0 0.90065 5.64160   2
  30  -6   0 0.32852 1.34816   3
  30  -6   0 0.06529 1.73755   9
  30  -6   0 0.16248 1.63416   9
  30  -6   0 0.13430 4.37391   2
 -30  -6   0 0.02619 3.43100   2
  30  -6   0 3.91445 3.13810   4
 -30  -6   0 0.65776 1.92687   8
  30  -6   0 0.65444 2.04892   6
 -30  -6   0 0.19745 1.61259   9
 -30  -6   0 -0.9219 1.94354   9
 -30  -6   0 -2.6103 2.93466   7
  30  -6   0 2.28198 3.75288   2
 -30   6   0 -0.6776 1.76967   4
  30   6   0 0.75385 1.80324   3
  30   6   0 -1.4790 1.82477   7
 -30   6   0 0.48795 1.87627   8
  30   6   0 0.86919 4.90407   2
 -30   6   0 -0.0996 4.15851   2
 -30   6   0 -0.6386 2.88531   9
  30   6   0 0.73024 1.75874   6
  30   6   0 0.30380 2.61425   9
 -30   6   0 2.27517 2.56537   9
 -32  -6   0 -1.6481 9.99789   2
  32  -6   0 -0.0037 2.40324   6
  32  -6   0 1.44688 4.24774   2
  32  -6   0 6.16132 5.32247   2
 -32  -6   0 1.12150 2.27815   9
 -32  -6   0 1.76010 1.79431   9
 -32  -6   0 0.62879 2.41811   8
 -32  -6   0 -0.5552 3.42603   7
 -32  -6   0 0.94205 3.84444   2
  32  -6   0 1.75119 1.53768   3
  32  -6   0 1.06462 1.92119   9
  32  -6   0 -0.8266 1.84356   9
  32   6   0 6.10769 5.39948   2
  32   6   0 4.24060 2.87546   9
 -32   6   0 3.59302 3.31055   9
  32   6   0 2.03220 2.02773   6
  32   6   0 1.07795 2.10717   7
  32   6   0 0.15425 2.09412   3
 -32   6   0 2.20593 2.79917   9
 -32   6   0 1.62504 2.00340   4
 -32   6   0 1.00568 2.06977   8
  32   6   0 6.41796 3.07829   9
 -32   6   0 6.14157 4.80982   2
  34  -6   0 1.78234 2.21937   9
  34  -6   0 1.04536 4.67789   2
 -34  -6   0 -1.9077 2.46946   9
  34  -6   0 -0.1817 2.08373   9
 -34  -6   0 -0.0974 1.99076   9
  34  -6   0 -2.9258 1.67393   3
  34  -6   0 -4.2580 10.9423   2
 -34  -6   0 2.99414 2.59671   8
 -34  -6   0 0.27589 4.18139   2
 -34  -6   0 -3.9366 7.24185   2
  34  -6   0 -1.6099 2.43563   6
 -34   6   0 -0.3439 6.12027   9
  34   6   0 -0.3539 2.14884   3
 -34   6   0 -0.2775 2.25985   4
 -34   6   0 -0.4473 3.00307   9
  34   6   0 3.82480 3.32114   9
 -34   6   0 1.91766 2.22478   8
 -34   6   0 1.10630 5.17856   2
  34   6   0 -0.7639 2.17761   6
  34   6   0 1.10985 5.95156   2
  34   6   0 0.27631 3.33148   9
  36  -6   0 43.4550 5.15961   9
 -36  -6   0 45.3264 6.33469   8
 -36  -6   0 50.1150 5.60024   9
 -36  -6   0 32.4104 9.68612   2
  36  -6   0 37.3487 8.37685   2
  36  -6   0 51.7197 10.0224   2
  36  -6   0 69.6336 9.42728   6
  36  -6   0 46.9730 4.13047   3
  36  -6   0 41.9850 5.03342   9
 -36  -6   0 63.6114 4.85145   9
 -36  -6   0 49.6937 8.83325   2
  36   6   0 56.2886 5.26090   3
 -36   6   0 47.8985 10.4204   2
 -36   6   0 40.5215 6.99026   9
  36   6   0 48.2962 5.15708   6
  36   6   0 52.3659 7.69684   9
  36   6   0 51.4353 7.51208   9
 -36   6   0 49.3930 8.06147   9
  36   6   0 31.4210 7.24339   2
 -36   6   0 59.1425 5.21763   4
 -36   6   0 45.6690 4.99054   8
  38  -6   0 29.4727 4.10208   3
  38  -6   0 32.9186 6.23469   6
  38  -6   0 29.0489 8.89559   2
 -38  -6   0 40.5328 11.1519   2
 -38  -6   0 28.3572 5.76169   9
 -38  -6   0 28.5307 4.82136   9
  38  -6   0 24.4872 6.54877   2
 -38  -6   0 25.5195 5.90572   2
  38  -6   0 28.1208 5.12457   9
 -38  -6   0 30.2726 5.62245   8
  38  -6   0 30.1170 5.29342   9
 -38   6   0 30.5470 7.59995   9
 -38   6   0 40.7609 5.40327   4
  38   6   0 29.2502 8.35802   2
  38   6   0 35.3997 5.31856   6
 -38   6   0 33.4652 5.00323   8
  38   6   0 32.3054 8.02835   9
 -38   6   0 41.9516 11.7220   2
  38   6   0 21.6141 5.38722   3
 -38   6   0 33.9971 8.63901   9
  38   6   0 24.0427 4.75400   9
  40  -6   0 -0.2390 9.08966   2
 -40  -6   0 3.33246 3.62662   8
 -40  -6   0 1.39022 2.70439   9
 -40  -6   0 3.83890 3.54687   9
 -40  -6   0 3.35187 12.3477   2
  40  -6   0 1.26852 3.57273   6
  40  -6   0 8.62596 6.67580   2
 -40  -6   0 -4.1643 5.78463   2
  40  -6   0 2.06784 2.95565   9
  40  -6   0 1.55482 2.47127   3
  40   6   0 4.88615 4.76881   9
  40   6   0 5.26114 4.86750   9
 -40   6   0 2.78329 7.91682   2
 -40   6   0 5.69590 5.29735   9
 -40   6   0 6.55628 3.17536   8
  40   6   0 4.75892 3.10766   3
 -40   6   0 4.12724 4.37954   9
  40   6   0 0.22507 8.51744   2
 -40   6   0 3.96561 3.68173   4
  40   6   0 0.02879 3.11079   6
  42  -6   0 11.9738 3.54974   9
  42  -6   0 7.63978 7.67357   2
  42  -6   0 11.6989 4.31951   6
 -42  -6   0 9.08179 3.22313   9
 -42  -6   0 4.49909 6.99213   2
  42  -6   0 9.33683 2.91013   3
  42  -6   0 9.87515 3.71956   9
 -42  -6   0 6.27822 4.11225   9
 -42  -6   0 8.64389 3.94518   8
  42   6   0 12.5490 10.5615   2
 -42   6   0 7.21290 3.76000   8
  42   6   0 9.11574 5.52936   9
 -42   6   0 11.4045 6.09404   9
  42   6   0 9.34790 3.61631   6
 -42   6   0 8.00838 9.00127   2
 -42   6   0 4.02053 3.48084   4
 -42   6   0 9.74897 5.09254   9
  42   6   0 -0.1507 5.38844   9
  42   6   0 11.0048 3.46663   3
 -44  -6   0 4.67707 4.42858   8
  44  -6   0 2.32857 4.47959   6
 -44  -6   0 2.40446 7.62925   2
  44  -6   0 5.01274 3.72976   9
 -44  -6   0 4.38743 3.51188   9
  44  -6   0 6.17305 3.74622   9
 -44  -6   0 3.31060 4.01411   9
  44  -6   0 9.52159 8.36648   2
  44   6   0 1.99630 6.09061   9
  44   6   0 -6.0334 10.9135   2
 -44   6   0 9.94230 5.69769   9
  44   6   0 8.59356 4.06641   6
  44   6   0 1.48374 3.67382   3
 -44   6   0 2.31780 9.85190   2
 -44   6   0 2.56579 6.61135   9
 -44   6   0 14.4143 4.12352   4
  44   6   0 -1.7747 6.04260   9
 -44   6   0 6.63091 3.94292   8
 -46  -6   0 132.310 9.53689   9
 -46  -6   0 143.609 10.9364   8
  46  -6   0 130.660 9.86917   9
  46  -6   0 121.188 18.4449   2
  46  -6   0 148.293 11.4241   6
  46  -6   0 121.471 9.84647   9
 -46  -6   0 140.711 16.5503   2
 -46  -6   0 123.191 10.2255   9
  46   6   0 126.535 10.3376   6
  46   6   0 153.286 9.86260   3
  46   6   0 117.146 24.9327   2
  46   6   0 106.764 18.4075   9
 -46   6   0 109.755 22.2514   2
 -46   6   0 148.783 10.2232   4
 -46   6   0 143.122 10.2420   8
 -48  -6   0 40.7986 8.06863   9
 -48  -6   0 63.8810 17.5111   8
 -48  -6   0 32.5131 10.1722   2
  48  -6   0 38.0200 8.36138   9
  48  -6   0 28.8967 11.2920   2
  48  -6   0 33.3373 8.39631   9
 -48  -6   0 44.5648 9.16958   9
  48  -6   0 38.5483 10.1223   6
 -48   6   0 58.0681 8.86811   8
  48   6   0 52.6891 8.39746   3
  48   6   0 35.7192 9.31639   6
  50  -6   0 116.851 13.1466   9
 -50  -6   0 126.999 10.5577   9
  50  -6   0 123.984 22.8369   2
 -50  -6   0 121.113 20.2355   2
  50  -6   0 127.446 10.9625   9
  50  -6   0 147.093 13.7494   6
 -50  -6   0 113.176 11.5557   9
 -50  -6   0 143.309 12.4858   8
  50   6   0 123.451 12.1936   6
  50   6   0 136.624 11.0098   3
 -50   6   0 129.017 11.4813   8
 -52  -6   0 14.4325 12.3974   2
  52  -6   0 15.0177 5.68871   9
  52  -6   0 20.2938 5.71429   9
 -52  -6   0 1.11782 10.8040   9
 -52  -6   0 15.5961 5.37840   9
  52  -6   0 28.1834 13.8386   2
  52   6   0 25.3779 6.02132   3
 -52   6   0 32.9037 11.2201   8
   1  -7   0 591.609 25.7316   6
  -1  -7   0 579.255 25.6789   8
  -1   7   0 564.866 25.6297   8
   1   7   0 587.278 25.7167   3
  -1   7   0 602.034 25.7084   6
  -1   7   0 587.440 25.6837   3
   1   7   0 580.394 25.6942   7
   1   7   0 613.897 25.6431   5
   1   7   0 593.592 25.6981   6
  -1   7   0 594.613 25.7333   4
  -1   7   0 617.591 25.5977   5
   1   7   0 589.665 25.6570   8
  -3  -7   0 11.8817 1.39844   8
   3  -7   0 9.42737 1.61086   6
  -3   7   0 7.93816 1.42017   4
  -3   7   0 9.36601 1.61252   6
  -3   7   0 9.18959 1.32285   8
  -3   7   0 10.1532 1.13598   5
   3   7   0 12.3713 1.40858   8
   3   7   0 11.6496 1.60614   6
   5  -7   0 13.4059 1.42802   2
   5  -7   0 12.5416 1.04284   5
  -5  -7   0 11.9557 1.58064   2
  -5  -7   0 10.7844 1.47822   8
  -5  -7   0 11.1190 1.32713   2
   5  -7   0 14.0856 1.76302   6
   5  -7   0 12.7137 1.38718   2
   5   7   0 10.2538 1.86408   2
  -5   7   0 15.3721 1.44549   8
   5   7   0 14.1837 1.92686   2
   5   7   0 7.89215 1.51299   8
  -5   7   0 13.3629 1.72614   6
  -5   7   0 13.0795 1.81350   2
   5   7   0 13.0851 1.58264   3
   5   7   0 10.5828 1.39381   7
   5   7   0 10.8429 1.67188   6
  -5   7   0 12.8289 1.55199   2
   5   7   0 11.6504 1.72016   5
   7  -7   0 261.567 13.3718   2
   7  -7   0 298.566 12.9229   5
   7  -7   0 292.268 13.2035   4
  -7  -7   0 291.421 13.2020   8
   7  -7   0 316.265 13.2239   2
  -7  -7   0 298.566 13.1346   7
   7  -7   0 288.387 13.2757   6
  -7  -7   0 295.445 13.2426   2
  -7  -7   0 286.590 13.1485   2
   7   7   0 279.904 13.2313   3
  -7   7   0 299.388 13.1659   2
  -7   7   0 310.485 13.1430   4
   7   7   0 327.406 13.2803   5
   7   7   0 290.608 13.0748   7
  -7   7   0 304.971 13.2670   2
   7   7   0 304.370 13.3165   2
   7   7   0 313.240 13.2946   2
  -7   7   0 296.794 13.2170   6
   9  -7   0 498.073 21.5671   2
   9  -7   0 498.092 21.5186   4
   9  -7   0 478.822 21.2836   5
  -9  -7   0 446.343 21.5207   2
  -9  -7   0 456.213 21.6385   2
  -9  -7   0 475.344 21.5297   8
   9  -7   0 478.712 21.5974   6
  -9  -7   0 507.981 21.4538   7
   9  -7   0 501.298 21.6162   2
   9   7   0 498.618 21.3748   7
  -9   7   0 508.163 21.4326   4
   9   7   0 514.223 21.7176   2
   9   7   0 494.759 21.5798   5
  -9   7   0 487.088 21.5267   6
   9   7   0 481.124 21.5127   8
   9   7   0 512.571 21.7427   2
  -9   7   0 508.519 21.5802   2
   9   7   0 513.023 21.1811   9
  -9   7   0 502.804 21.7689   2
  -9   7   0 494.820 21.2743   3
   9   7   0 493.926 21.1786   9
   9   7   0 464.376 21.5584   3
 -11  -7   0 86.0486 4.46078   8
  11  -7   0 90.7833 4.58946   4
  11  -7   0 96.7950 4.67031   6
  11  -7   0 74.3406 4.76453   2
 -11  -7   0 83.1226 5.03026   2
  11  -7   0 85.7028 4.83916   2
 -11  -7   0 82.0322 4.65041   2
 -11  -7   0 93.0682 4.43259   7
  11  -7   0 82.4390 4.06193   5
 -11   7   0 86.7713 4.00808   3
  11   7   0 89.2054 4.19313   9
  11   7   0 85.8764 5.25327   2
 -11   7   0 91.6389 4.91187   2
  11   7   0 86.1708 4.21102   7
  11   7   0 84.8591 4.70182   5
 -11   7   0 87.0295 4.55860   6
 -11   7   0 89.9482 5.34526   2
  11   7   0 88.2938 4.50978   3
  11   7   0 93.6784 4.13699   9
 -11   7   0 87.5470 4.30440   4
  11   7   0 91.7373 4.54848   8
  11   7   0 76.7751 5.26723   2
 -11   7   0 89.3832 4.15860   9
 -11   7   0 88.2231 4.17323   9
  13  -7   0 309.341 13.5589   4
 -13  -7   0 302.649 13.4663   7
  13  -7   0 292.270 13.8356   2
 -13  -7   0 291.341 13.5675   8
 -13  -7   0 298.700 13.7837   2
 -13  -7   0 282.809 13.9929   2
  13  -7   0 290.553 13.8454   2
  13  -7   0 298.999 13.2426   5
  13  -7   0 305.313 13.6728   6
  13   7   0 295.328 13.5763   8
 -13   7   0 310.647 13.3147   9
  13   7   0 284.591 13.5871   3
 -13   7   0 302.930 13.1089   3
 -13   7   0 300.692 13.4013   4
  13   7   0 301.573 13.6901   5
 -13   7   0 324.842 13.9193   2
 -13   7   0 310.039 13.3708   9
  13   7   0 321.576 14.1693   2
 -13   7   0 292.182 13.5651   6
  13   7   0 311.243 13.3121   9
 -13   7   0 307.899 14.2018   2
  13   7   0 305.188 13.3426   9
  13   7   0 329.771 14.1767   2
  13   7   0 291.787 13.3278   7
  15  -7   0 69.0387 4.13949   4
  15  -7   0 74.7918 4.75711   2
  15  -7   0 67.0200 4.75960   2
 -15  -7   0 61.7492 5.25792   2
  15  -7   0 74.3419 3.60005   5
  15  -7   0 72.5142 4.23313   6
 -15  -7   0 72.5981 4.04009   8
 -15  -7   0 61.7123 4.49114   2
 -15  -7   0 77.2686 4.07714   7
  15   7   0 64.7138 5.65601   2
  15   7   0 73.5215 3.90341   9
 -15   7   0 73.5227 3.28169   3
 -15   7   0 60.5666 5.65349   2
 -15   7   0 84.8468 6.03227   2
  15   7   0 78.0494 4.24149   8
  15   7   0 62.9693 4.49831   3
 -15   7   0 62.2315 3.81491   9
  15   7   0 71.2858 3.72060   7
  15   7   0 74.6673 4.15414   4
 -15   7   0 73.7945 3.83371   4
  15   7   0 79.7087 4.53215   5
 -15   7   0 76.6300 4.02650   9
 -15   7   0 75.4414 3.71192   8
  15   7   0 77.9970 5.44189   2
 -15   7   0 72.6515 4.24075   6
  15   7   0 69.5588 3.67157   6
  15   7   0 70.0352 3.82074   9
 -17  -7   0 630.600 31.9021   2
  17  -7   0 735.969 31.3459   4
 -17  -7   0 734.622 31.2733   7
 -17  -7   0 709.074 31.7159   2
 -17  -7   0 742.107 31.5222   8
  17  -7   0 730.268 31.8314   2
  17  -7   0 704.141 31.0646   5
  17  -7   0 732.762 31.7934   2
  17   7   0 716.035 31.1220   6
  17   7   0 731.931 31.5363   5
 -17   7   0 737.912 31.8084   2
  17   7   0 718.306 31.9955   2
 -17   7   0 683.300 31.1441   9
 -17   7   0 724.869 31.3748   6
  17   7   0 701.888 31.2131   9
 -17   7   0 686.182 31.1193   8
  17   7   0 708.012 31.3940   3
 -17   7   0 708.686 30.8395   3
  17   7   0 722.175 31.1245   7
  17   7   0 713.438 31.3556   4
  17   7   0 725.368 31.4131   8
 -17   7   0 762.655 31.2608   9
  17   7   0 738.038 31.1813   9
 -17   7   0 713.859 31.1861   4
  19  -7   0 425.284 18.4715   5
  19  -7   0 432.366 19.4540   2
  19  -7   0 428.676 18.8135   4
 -19  -7   0 372.977 19.6533   2
 -19  -7   0 421.208 19.2851   2
 -19  -7   0 419.558 18.8329   8
  19  -7   0 423.513 18.9316   6
 -19  -7   0 431.040 18.7316   7
  19  -7   0 432.755 19.4336   2
  19   7   0 421.336 18.6371   9
 -19   7   0 421.708 18.1829   3
 -19   7   0 434.445 18.8607   6
 -19   7   0 417.500 18.6123   9
 -19   7   0 419.339 18.5804   4
  19   7   0 413.676 18.8731   8
 -19   7   0 432.947 18.7051   9
 -19   7   0 399.123 18.5096   8
  19   7   0 414.498 18.5156   7
  19   7   0 426.024 18.7024   9
 -19   7   0 446.531 19.4692   2
  19   7   0 411.582 18.8119   4
  19   7   0 412.950 18.5063   6
  19   7   0 418.055 19.7253   2
  19   7   0 426.000 18.8187   3
 -21  -7   0 2.61282 3.52788   2
 -21  -7   0 3.92422 1.79180   7
 -21  -7   0 3.23872 1.53768   8
 -21  -7   0 7.14631 3.29058   2
  21  -7   0 2.56743 1.18418   5
  21  -7   0 2.41498 1.93565   4
  21  -7   0 4.83011 2.82408   2
  21  -7   0 2.85694 1.55390   6
  21  -7   0 2.37202 2.57459   2
 -21   7   0 1.94380 2.76725   2
 -21   7   0 3.87591 0.77719   3
  21   7   0 2.19470 3.17590   2
 -21   7   0 4.24955 1.63871   9
  21   7   0 4.37320 1.28517   7
 -21   7   0 4.60481 1.32930   4
 -21   7   0 3.35090 1.34805   8
  21   7   0 5.74559 1.27061   6
 -21   7   0 1.93203 1.78892   9
  21   7   0 3.31953 1.74237   9
  21   7   0 4.73854 2.04488   8
  21   7   0 2.37420 1.44755   3
  21   7   0 3.10386 1.82202   4
  21   7   0 3.36524 1.60902   9
 -21   7   0 1.80232 1.97298   6
 -23  -7   0 264.474 12.4039   7
  23  -7   0 255.274 11.9782   5
  23  -7   0 265.142 13.4230   2
 -23  -7   0 285.655 12.4944   8
  23  -7   0 273.096 13.6090   2
 -23  -7   0 267.571 14.1301   2
 -23  -7   0 255.389 13.1894   2
  23  -7   0 265.910 12.5506   6
  23  -7   0 264.568 12.5742   4
  23   7   0 260.252 14.0094   2
  23   7   0 258.830 12.4423   9
 -23   7   0 258.206 12.5887   6
 -23   7   0 284.412 12.1096   8
  23   7   0 257.930 12.6439   8
 -23   7   0 256.749 12.6387   7
 -23   7   0 267.508 11.6241   3
 -23   7   0 279.779 12.5023   9
  23   7   0 276.536 12.0884   7
  23   7   0 251.301 12.5063   4
 -23   7   0 261.627 13.5216   2
 -23   7   0 266.513 12.3346   9
 -23   7   0 280.375 12.1507   4
  23   7   0 267.009 12.0504   6
  23   7   0 254.778 12.3272   3
  23   7   0 253.879 12.3671   9
  25  -7   0 137.801 9.65084   2
  25  -7   0 150.886 8.23143   4
  25  -7   0 156.553 9.36411   2
  25  -7   0 168.137 8.03054   6
 -25  -7   0 161.847 7.88361   8
 -25  -7   0 146.949 7.99494   7
 -25  -7   0 158.068 6.83660   9
 -25  -7   0 156.251 8.97986   2
 -25  -7   0 135.854 6.82325   9
  25   7   0 154.275 8.05867   9
 -25   7   0 146.709 7.82093   9
 -25   7   0 150.785 8.18433   9
  25   7   0 149.455 8.10824   9
  25   7   0 148.334 7.49673   6
 -25   7   0 150.726 6.78629   3
  25   7   0 155.230 7.70548   3
 -25   7   0 140.866 9.36951   2
  25   7   0 157.932 8.18753   4
  25   7   0 136.253 8.24465   8
 -25   7   0 146.232 7.39632   4
 -25   7   0 137.624 8.20145   6
 -25   7   0 152.880 8.36744   7
  25   7   0 140.459 10.2358   2
 -25   7   0 140.849 7.39707   8
 -27  -7   0 1.16837 1.97754   8
  27  -7   0 0.28135 1.00806   9
  27  -7   0 1.43425 2.73730   4
 -27  -7   0 -0.6027 1.22355   9
 -27  -7   0 1.41494 2.96232   2
 -27  -7   0 0.53594 1.12542   9
  27  -7   0 -0.3426 1.03573   9
  27  -7   0 -0.3728 1.92874   6
  27  -7   0 1.38759 3.41372   2
 -27  -7   0 -0.5988 2.53108   7
 -27   7   0 2.11198 3.63892   2
  27   7   0 -0.9882 2.30367   9
  27   7   0 -0.0343 4.11724   2
  27   7   0 -0.7341 1.78596   3
 -27   7   0 -0.2932 2.19578   9
 -27   7   0 0.66394 1.61313   4
  27   7   0 0.98347 1.62321   7
 -27   7   0 0.70235 1.14721   3
  27   7   0 -1.3244 2.39604   9
 -27   7   0 0.47784 2.57950   9
 -27   7   0 3.70863 1.72936   8
  27   7   0 -1.0390 1.54948   6
 -29  -7   0 10.6912 5.42564   7
 -29  -7   0 9.63129 2.55203   8
 -29  -7   0 10.3783 2.44362   9
 -29  -7   0 8.62965 3.52564   2
  29  -7   0 10.6129 2.23322   3
  29  -7   0 12.3111 2.45543   9
  29  -7   0 11.8566 2.63143   6
  29  -7   0 6.68064 3.22958   4
  29  -7   0 10.0211 2.30885   9
  29  -7   0 6.57170 3.77320   2
 -29  -7   0 2.02815 5.37293   2
 -29  -7   0 9.94119 2.67578   9
  29   7   0 7.85075 2.03763   7
  29   7   0 4.05311 4.93430   2
 -29   7   0 6.67253 1.99619   4
  29   7   0 6.83049 2.69225   9
 -29   7   0 8.78254 2.01638   8
  29   7   0 8.02565 4.36071   9
 -29   7   0 10.2137 3.17569   9
 -29   7   0 4.33433 2.62287   9
  29   7   0 7.44619 2.02193   3
  29   7   0 7.11590 1.91466   6
 -29   7   0 11.9472 4.24218   2
  31  -7   0 4.83191 1.60593   9
 -31  -7   0 7.12879 3.96466   2
 -31  -7   0 5.46228 1.61729   9
  31  -7   0 10.3345 4.41110   2
 -31  -7   0 1.51485 3.45769   7
  31  -7   0 3.03516 5.08690   2
 -31  -7   0 4.94234 6.13957   2
  31  -7   0 5.93009 1.62825   9
 -31  -7   0 2.70230 2.51189   8
 -31  -7   0 5.84970 1.83857   9
  31  -7   0 8.85948 2.67390   6
  31  -7   0 2.50667 1.47588   3
 -31   7   0 4.17581 2.09908   4
  31   7   0 5.28617 2.14088   7
  31   7   0 5.74736 2.04333   6
  31   7   0 5.52610 3.16163   9
 -31   7   0 2.28644 4.49969   2
 -31   7   0 8.92617 2.95565   9
  31   7   0 5.59054 3.00390   9
 -31   7   0 7.40621 3.57583   9
  31   7   0 10.9241 2.42052   3
  31   7   0 6.34669 5.61487   2
 -31   7   0 7.57637 2.18242   8
  33  -7   0 17.0789 3.34649   9
 -33  -7   0 12.2900 7.41000   2
 -33  -7   0 21.2835 3.33360   9
 -33  -7   0 25.3053 4.77022   8
  33  -7   0 21.8264 3.35074   9
 -33  -7   0 24.1934 7.34137   2
 -33  -7   0 21.2337 4.33273   7
  33  -7   0 22.3606 5.16758   6
 -33  -7   0 21.6874 3.68687   9
  33  -7   0 16.7125 3.47314   9
  33  -7   0 26.5824 6.35053   2
  33  -7   0 23.8350 3.00944   3
  33  -7   0 33.1655 8.47307   2
  33   7   0 24.6966 4.15809   6
  33   7   0 25.4263 4.28232   7
  33   7   0 17.5549 6.33718   2
 -33   7   0 23.5932 4.16281   4
 -33   7   0 24.2827 7.08971   9
 -33   7   0 24.9571 4.03197   8
 -33   7   0 9.34636 5.56780   2
  33   7   0 24.4399 6.40769   9
  33   7   0 22.0063 4.34394   3
  33   7   0 28.4110 6.64410   9
  35  -7   0 40.3936 9.44857   2
  35  -7   0 40.8835 3.83377   3
 -35  -7   0 46.5930 7.09064   8
  35  -7   0 48.1928 4.29722   9
 -35  -7   0 25.0860 8.83706   2
 -35  -7   0 58.1609 8.59715   2
 -35  -7   0 45.0518 4.23772   9
  35  -7   0 35.3014 7.75926   2
 -35  -7   0 43.7207 4.60673   9
  35  -7   0 45.5122 4.37471   9
  35  -7   0 49.6992 4.40976   9
  35  -7   0 53.5547 7.91711   6
  35   7   0 41.4082 7.53574   9
 -35   7   0 39.1319 8.23999   9
  35   7   0 64.1373 5.40487   3
 -35   7   0 49.8921 5.08246   4
 -35   7   0 52.2766 10.5225   2
 -35   7   0 48.0068 4.86998   8
  35   7   0 37.5391 7.68568   9
 -35   7   0 43.2842 7.05010   9
  35   7   0 53.0747 5.03041   6
  35   7   0 40.3406 7.92679   2
  37  -7   0 190.228 9.79714   9
 -37  -7   0 192.262 19.3195   2
 -37  -7   0 198.420 9.99626   9
 -37  -7   0 189.676 9.81569   9
  37  -7   0 202.302 9.43867   3
 -37  -7   0 196.040 13.5688   2
  37  -7   0 210.315 11.2950   6
  37  -7   0 190.529 17.0467   2
  37  -7   0 222.339 14.5728   2
 -37  -7   0 191.640 10.8377   8
  37   7   0 187.401 12.4557   9
 -37   7   0 191.441 10.2864   8
 -37   7   0 187.940 15.0377   2
  37   7   0 214.271 10.6247   3
  37   7   0 192.591 12.3343   9
 -37   7   0 192.024 10.3647   4
 -37   7   0 178.034 11.8580   9
  37   7   0 172.655 17.1311   2
 -37   7   0 188.905 12.6633   9
  37   7   0 206.195 10.4130   6
  39  -7   0 25.2179 4.83273   9
 -39  -7   0 33.0110 10.5583   2
 -39  -7   0 36.7490 6.17773   8
  39  -7   0 26.0500 6.62625   2
  39  -7   0 22.6175 4.66983   9
  39  -7   0 27.8621 4.87726   9
  39  -7   0 35.3631 6.88986   6
 -39  -7   0 39.3188 10.0962   2
  39  -7   0 25.4851 4.21339   3
 -39  -7   0 26.4518 4.64383   9
  39  -7   0 26.2205 9.81598   2
  39   7   0 35.7172 5.76954   3
 -39   7   0 25.4099 5.54367   4
  39   7   0 30.3599 9.50352   2
 -39   7   0 11.8141 7.05386   2
  39   7   0 32.2302 9.61380   9
  39   7   0 29.6532 5.64601   6
 -39   7   0 29.8994 8.62348   9
 -39   7   0 39.6379 5.54518   8
 -39   7   0 22.0946 5.74819   9
  41  -7   0 13.1503 2.95895   9
  41  -7   0 18.2545 4.51010   6
  41  -7   0 12.1031 2.96726   9
  41  -7   0 16.2246 11.1441   2
  41  -7   0 19.3971 5.23117   9
 -41  -7   0 10.4500 2.86113   9
 -41  -7   0 11.6469 7.22325   2
 -41  -7   0 16.2411 4.34570   8
 -41  -7   0 14.7611 3.29801   9
 -41   7   0 11.3337 5.26483   9
  41   7   0 25.3377 19.5198   2
 -41   7   0 17.1232 3.67144   8
  41   7   0 8.28767 5.70682   9
 -41   7   0 8.71391 6.28264   9
 -41   7   0 13.0273 3.61603   4
  41   7   0 20.5466 4.39082   6
 -41   7   0 8.21117 7.81756   2
  41   7   0 11.6798 5.70303   9
  41   7   0 7.22007 3.52951   3
  43  -7   0 35.8439 5.80805   9
 -43  -7   0 33.4006 5.77504   9
  43  -7   0 23.9125 8.06604   2
  43  -7   0 38.0299 8.42499   6
 -43  -7   0 54.4181 12.7323   2
 -43  -7   0 36.8838 6.50698   9
 -43  -7   0 37.8997 7.76171   8
  43  -7   0 36.2124 5.90498   9
  43  -7   0 43.1290 6.18676   9
  43   7   0 39.3909 7.00390   9
  43   7   0 41.1685 7.00107   3
 -43   7   0 20.1670 14.3656   2
 -43   7   0 36.0545 7.02284   4
 -43   7   0 38.9266 11.1646   9
 -43   7   0 40.9645 6.91650   8
  43   7   0 35.9364 7.19656   6
  43   7   0 42.6291 12.1231   2
  45  -7   0 12.7600 3.61137   9
  45  -7   0 11.9482 3.52201   9
 -45  -7   0 9.69171 5.11502   8
 -45  -7   0 8.19404 3.91642   9
  45  -7   0 12.7760 3.58123   9
 -45  -7   0 14.2414 3.48828   9
 -45  -7   0 13.0113 7.73247   2
  45  -7   0 7.53188 9.12431   2
  45  -7   0 14.4580 5.47607   6
 -45   7   0 9.68755 4.43067   8
  45   7   0 9.72586 4.47041   6
 -45   7   0 15.5125 4.57211   4
  45   7   0 4.37413 4.08977   3
  47  -7   0 -0.4228 6.47717   6
  47  -7   0 7.29141 10.5057   2
 -47  -7   0 -0.3622 4.28342   9
  47  -7   0 -0.2901 3.68255   3
  47  -7   0 0.01328 3.64304   9
 -47  -7   0 1.35544 6.19402   8
 -47  -7   0 2.35325 3.65089   9
 -47  -7   0 0.79865 9.14854   2
  47  -7   0 1.04815 3.73477   9
  47   7   0 1.54384 4.43551   3
  47   7   0 1.46033 4.94494   6
 -47   7   0 -1.1114 4.61039   4
 -47   7   0 0.40900 4.92056   8
 -49  -7   0 -0.3043 6.14174   8
  49  -7   0 -2.5631 3.94598   9
  49  -7   0 -1.1389 5.29221   5
 -49  -7   0 1.95829 4.66652   9
  49  -7   0 8.54241 11.5184   2
  49  -7   0 1.97825 6.59236   6
 -49  -7   0 12.8443 10.3094   2
  49   7   0 1.58352 5.09842   3
 -49   7   0 6.54906 5.49598   8
  49   7   0 0.08609 5.69565   6
  51  -7   0 -0.2092 4.31151   9
 -51  -7   0 3.32356 11.4756   2
  51  -7   0 -3.4649 6.09910   5
  51  -7   0 4.69284 4.31375   9
  51  -7   0 0.85825 12.8891   2
 -51  -7   0 5.99265 5.08045   9
 -51  -7   0 2.25195 4.42656   9
  51   7   0 5.02681 5.65503   3
  51   7   0 2.24926 6.43701   6
 -51   7   0 2.25143 6.11878   8
   0   8   0 2430.97 103.949   4
   0   8   0 2419.20 103.797   5
   0   8   0 2396.73 103.885   6
   0   8   0 2373.97 103.907   7
   0   8   0 2404.20 103.904   3
   0   8   0 2476.26 103.842   8
   2  -8   0 385.428 17.9652   6
  -2  -8   0 396.874 17.9087   8
  -2   8   0 410.339 17.9404   6
   2   8   0 411.696 17.8750   5
  -2   8   0 390.116 17.7540   5
   2   8   0 436.502 17.9492   6
  -2   8   0 416.549 17.8468   8
   2   8   0 417.502 17.8827   8
  -2   8   0 409.682 17.9532   4
   2   8   0 407.647 17.9133   7
  -2   8   0 408.713 17.8870   3
   2   8   0 411.222 17.9625   3
   4  -8   0 977.232 40.2863   6
  -4  -8   0 911.804 40.1913   8
   4  -8   0 897.537 39.9558   5
   4   8   0 944.666 40.1627   8
   4   8   0 905.880 40.2348   3
  -4   8   0 918.866 40.0996   3
   4   8   0 918.804 40.1373   7
  -4   8   0 927.747 39.9692   5
  -4   8   0 947.241 40.0982   8
   4   8   0 926.465 40.1563   6
   4   8   0 939.944 40.1686   5
  -4   8   0 927.381 40.1765   4
   6  -8   0 542.962 24.5005   2
  -6  -8   0 552.376 24.7059   8
  -6  -8   0 596.433 24.5821   2
   6  -8   0 541.373 24.4168   5
   6  -8   0 582.114 24.7978   6
   6  -8   0 578.021 24.5343   2
  -6  -8   0 585.834 24.5403   2
  -6   8   0 556.737 24.3972   5
   6   8   0 602.362 24.6389   2
   6   8   0 576.622 24.6850   8
   6   8   0 557.821 24.7730   5
   6   8   0 579.071 24.6683   6
  -6   8   0 579.424 24.6573   4
   6   8   0 560.727 24.5985   7
  -6   8   0 575.057 24.5835   8
  -6   8   0 544.199 24.4981   2
  -6   8   0 501.204 25.0006   2
   6   8   0 573.509 24.6338   2
   6   8   0 549.537 24.7467   3
  -6   8   0 581.140 24.7180   6
   8  -8   0 17.0749 2.16467   2
   8  -8   0 18.8850 2.17455   4
   8  -8   0 15.8109 1.29266   5
  -8  -8   0 15.2644 1.92480   2
  -8  -8   0 17.6066 1.90224   8
  -8  -8   0 17.1122 1.98511   7
  -8  -8   0 17.8621 2.39600   2
   8  -8   0 14.6186 2.21331   6
   8  -8   0 15.4365 2.11320   2
   8   8   0 15.8972 2.97451   2
   8   8   0 18.8633 2.34278   5
  -8   8   0 17.1813 1.84164   4
  -8   8   0 21.6359 2.40340   2
  -8   8   0 16.1306 2.73454   2
   8   8   0 16.4573 2.03401   8
   8   8   0 16.6284 1.71971   7
   8   8   0 20.5637 2.09882   3
   8   8   0 13.4440 2.88327   2
  -8   8   0 18.2812 2.23867   6
 -10  -8   0 265.766 12.2743   8
 -10  -8   0 268.674 12.4895   2
  10  -8   0 279.395 12.3988   2
  10  -8   0 274.530 12.4026   6
  10  -8   0 263.117 12.2641   4
 -10  -8   0 261.658 12.1672   7
  10  -8   0 266.748 12.3191   2
 -10  -8   0 259.799 12.2914   2
  10   8   0 281.695 12.3486   3
  10   8   0 263.702 12.2646   8
  10   8   0 272.520 12.5798   2
  10   8   0 290.456 12.4124   5
 -10   8   0 262.627 12.2879   6
  10   8   0 273.310 11.8732   9
  10   8   0 270.870 12.0632   7
  10   8   0 285.786 12.6465   2
  10   8   0 277.727 11.8627   9
 -10   8   0 259.357 12.5411   2
 -10   8   0 280.355 12.1438   4
 -10   8   0 284.589 12.3888   2
 -10   8   0 279.169 11.9520   3
  12  -8   0 50.9776 2.76620   5
 -12  -8   0 54.4791 3.36458   8
  12  -8   0 51.6263 3.48161   4
 -12  -8   0 61.5847 3.61171   2
  12  -8   0 51.4871 3.82372   2
 -12  -8   0 60.8199 3.34884   7
  12  -8   0 53.9260 3.60587   6
 -12  -8   0 51.4862 4.19947   2
 -12   8   0 46.7856 2.95301   9
 -12   8   0 50.4847 2.70888   3
 -12   8   0 52.9295 5.22430   2
 -12   8   0 53.3744 4.03489   2
 -12   8   0 48.3658 3.54379   6
  12   8   0 57.4101 3.79229   5
  12   8   0 47.2244 5.85504   2
  12   8   0 51.5294 3.46277   8
  12   8   0 53.1093 3.55270   3
  12   8   0 56.9781 3.01746   7
 -12   8   0 51.7828 3.00482   9
  12   8   0 48.9960 4.58746   2
  12   8   0 56.0001 3.04498   9
 -12   8   0 54.3792 3.12536   4
  12   8   0 62.9910 2.96587   9
  14  -8   0 153.353 7.43676   6
  14  -8   0 149.389 7.67595   2
  14  -8   0 147.789 6.79573   5
 -14  -8   0 122.440 7.89957   2
 -14  -8   0 159.741 7.23845   7
 -14  -8   0 156.001 7.53889   2
  14  -8   0 156.896 7.70701   2
 -14  -8   0 153.396 7.28112   8
  14  -8   0 149.866 7.31681   4
 -14   8   0 141.648 7.35828   6
 -14   8   0 151.655 7.03533   4
 -14   8   0 142.531 6.95654   9
  14   8   0 149.704 7.00991   9
 -14   8   0 146.557 7.75209   2
  14   8   0 148.845 6.94844   9
  14   8   0 153.189 7.30914   3
  14   8   0 146.426 7.34765   8
 -14   8   0 153.584 7.05768   9
  14   8   0 153.134 7.58957   5
  14   8   0 147.861 8.26742   2
 -14   8   0 148.110 6.62726   3
  14   8   0 163.035 6.99060   7
 -16  -8   0 8.79822 2.55474   2
  16  -8   0 8.12418 2.11234   2
  16  -8   0 10.3718 1.87304   6
  16  -8   0 5.35584 1.70811   4
  16  -8   0 8.21459 1.64279   5
  16  -8   0 8.36288 2.78549   2
 -16  -8   0 7.76122 1.59571   7
 -16  -8   0 12.8919 3.01276   2
 -16   8   0 10.7344 2.52236   9
 -16   8   0 11.8596 2.05851   4
  16   8   0 8.06156 1.43332   9
  16   8   0 8.11398 2.22660   9
  16   8   0 6.53144 1.82332   8
  16   8   0 7.90796 1.77041   6
  16   8   0 6.83456 1.62404   4
  16   8   0 10.3318 2.96138   2
  16   8   0 9.38238 1.91532   7
 -16   8   0 9.33154 2.39360   2
  16   8   0 7.77517 1.54144   3
 -16   8   0 9.10889 1.82203   6
  16   8   0 9.67931 2.10004   5
 -16   8   0 9.03595 1.81082   8
 -16   8   0 7.09538 1.00621   3
 -16   8   0 8.34495 2.25884   9
  18  -8   0 490.619 21.5122   2
  18  -8   0 473.252 21.6921   2
 -18  -8   0 465.918 21.7046   2
  18  -8   0 481.487 20.9902   4
 -18  -8   0 438.893 21.7773   2
  18  -8   0 474.934 20.5914   5
 -18  -8   0 456.555 20.9931   8
 -18  -8   0 477.884 20.8842   7
  18  -8   0 474.539 21.1247   6
  18   8   0 470.951 20.6597   7
 -18   8   0 457.494 20.7298   4
  18   8   0 483.101 21.0241   3
  18   8   0 462.492 22.2556   2
 -18   8   0 483.490 21.0306   6
 -18   8   0 496.260 20.8586   9
  18   8   0 479.244 21.0100   4
 -18   8   0 506.292 21.5486   2
 -18   8   0 466.580 20.6649   8
  18   8   0 486.376 21.2362   5
  18   8   0 448.707 20.7866   9
  18   8   0 477.129 21.0528   8
 -18   8   0 446.833 20.7189   9
 -18   8   0 461.338 20.3059   3
  18   8   0 454.573 20.7337   9
  18   8   0 469.334 20.6564   6
  20  -8   0 577.987 25.9899   5
 -20  -8   0 619.318 27.2658   2
  20  -8   0 598.772 26.9736   2
 -20  -8   0 624.758 26.4670   8
 -20  -8   0 597.799 26.2872   7
  20  -8   0 602.127 26.9945   2
 -20  -8   0 590.522 26.8186   2
  20  -8   0 599.508 26.5390   6
  20  -8   0 596.740 26.3960   4
  20   8   0 625.228 26.6415   4
  20   8   0 566.364 26.3670   3
  20   8   0 605.930 26.2632   9
 -20   8   0 674.649 28.5903   2
 -20   8   0 626.257 26.1623   4
  20   8   0 600.242 26.1940   9
 -20   8   0 499.426 27.7870   6
 -20   8   0 600.464 26.2531   9
  20   8   0 594.894 26.7830   8
 -20   8   0 594.121 26.1683   9
 -20   8   0 616.528 26.0841   8
  20   8   0 590.704 26.0545   6
  20   8   0 595.763 26.0676   7
  20   8   0 561.757 27.1476   5
  20   8   0 555.006 27.2525   2
  22  -8   0 140.773 7.18783   6
  22  -8   0 137.238 7.23955   4
 -22  -8   0 125.113 6.90330   8
  22  -8   0 116.403 8.00564   2
 -22  -8   0 126.602 9.07679   2
 -22  -8   0 117.234 7.67227   2
  22  -8   0 135.723 6.34200   5
 -22  -8   0 130.121 7.05119   7
  22  -8   0 125.982 8.32911   2
 -22   8   0 130.875 6.41872   8
  22   8   0 125.473 6.81108   3
 -22   8   0 126.940 7.07304   4
  22   8   0 128.760 7.06802   9
  22   8   0 129.804 6.41441   7
  22   8   0 123.301 7.30354   8
  22   8   0 147.448 6.44007   6
 -22   8   0 130.048 6.86090   9
 -22   8   0 142.861 8.46677   2
 -22   8   0 128.434 7.42641   7
  22   8   0 122.470 7.82719   5
  22   8   0 115.728 9.19208   2
  22   8   0 118.564 7.16892   4
 -22   8   0 130.665 7.12696   9
  22   8   0 134.232 6.94065   9
 -22   8   0 126.980 7.24638   6
 -24  -8   0 516.482 22.7549   8
  24  -8   0 487.106 22.7865   4
  24  -8   0 507.902 22.2732   5
  24  -8   0 507.427 22.8613   6
 -24  -8   0 486.286 24.0793   2
  24  -8   0 520.674 23.6231   2
 -24  -8   0 489.771 22.6373   7
  24  -8   0 511.203 23.7166   2
 -24  -8   0 499.812 23.3433   2
 -24   8   0 511.986 22.8405   6
  24   8   0 493.300 22.3146   6
  24   8   0 473.282 22.8372   8
 -24   8   0 543.076 22.7261   9
 -24   8   0 503.590 22.8985   7
  24   8   0 510.189 22.7852   4
 -24   8   0 539.928 22.3610   8
  24   8   0 509.061 22.6795   9
 -24   8   0 516.023 22.5777   9
 -24   8   0 502.578 23.5965   2
  24   8   0 519.960 23.2529   5
  24   8   0 500.286 22.6034   9
  24   8   0 499.548 22.6472   3
  24   8   0 461.926 24.0781   2
  24   8   0 515.877 22.3364   7
 -24   8   0 514.347 22.4001   4
 -26  -8   0 19.6941 4.61730   7
 -26  -8   0 18.3737 5.18348   2
 -26  -8   0 14.4050 4.90213   2
  26  -8   0 16.9060 2.84254   5
  26  -8   0 14.8234 2.65506   6
 -26  -8   0 15.6306 3.58464   8
  26  -8   0 10.7810 3.99471   2
  26  -8   0 19.5031 5.91585   2
  26   8   0 15.7173 2.93766   6
 -26   8   0 21.4872 3.19579   4
  26   8   0 15.3526 2.75861   9
  26   8   0 16.7977 3.11657   7
  26   8   0 22.5531 3.56700   3
 -26   8   0 14.0276 2.91967   8
  26   8   0 16.3773 5.02380   2
 -26   8   0 11.6184 2.88465   9
  26   8   0 14.5846 2.82385   9
 -26   8   0 13.1054 2.60201   9
 -26   8   0 17.5728 4.32101   2
 -28  -8   0 71.5089 7.24362   2
 -28  -8   0 81.6523 5.76702   8
  28  -8   0 79.5522 8.00587   2
 -28  -8   0 70.9246 10.1088   2
  28  -8   0 84.8814 4.99814   5
 -28  -8   0 82.5119 6.68178   7
  28  -8   0 79.8273 7.01587   4
  28  -8   0 87.3030 8.90441   2
  28  -8   0 75.5955 6.11727   6
  28   8   0 74.2818 10.0293   2
  28   8   0 80.6623 5.16434   7
  28   8   0 88.2320 6.74916   9
  28   8   0 79.9025 6.56755   9
 -28   8   0 82.2174 6.30489   9
  28   8   0 88.9248 5.55284   3
 -28   8   0 85.4458 8.68842   2
 -28   8   0 92.3555 7.03740   9
 -28   8   0 83.9198 5.06490   8
 -28   8   0 81.9332 5.19336   4
  28   8   0 79.2311 5.08324   6
  30  -8   0 16.4279 4.29113   2
  30  -8   0 16.8115 3.53377   5
  30  -8   0 21.0765 4.82096   6
  30  -8   0 13.7597 5.04258   2
 -30  -8   0 15.7650 3.91451   2
 -30  -8   0 19.0220 4.34230   8
 -30  -8   0 15.5449 3.70614   7
  30  -8   0 11.6924 3.90601   4
 -30   8   0 13.7265 3.53937   8
  30   8   0 15.8726 3.75518   7
  30   8   0 14.6890 2.61621   3
 -30   8   0 14.8173 3.75244   9
  30   8   0 13.1896 3.28178   9
 -30   8   0 17.2132 4.86385   2
 -30   8   0 12.6076 3.17474   9
  30   8   0 17.9776 3.48003   9
  30   8   0 22.5032 3.64661   6
 -30   8   0 21.5163 3.71530   4
  30   8   0 13.2299 5.69741   2
  32  -8   0 2.18972 4.46080   2
 -32  -8   0 -1.8386 3.84963   2
  32  -8   0 2.25425 2.16503   5
 -32  -8   0 1.97234 3.91918   7
 -32  -8   0 2.50162 7.38927   2
  32  -8   0 3.37454 2.92988   6
 -32  -8   0 -0.1620 2.51033   8
  32   8   0 3.46081 6.33317   2
 -32   8   0 1.68105 2.26307   8
 -32   8   0 -2.6813 2.15346   4
 -32   8   0 -1.9237 3.93432   9
 -32   8   0 2.09897 3.31166   9
  32   8   0 3.33105 3.48879   9
  32   8   0 1.73265 2.29570   3
  32   8   0 2.10505 2.29172   7
 -32   8   0 2.29268 5.06503   2
  32   8   0 2.49608 2.21272   6
  32   8   0 1.17988 3.53195   9
 -34  -8   0 12.3033 4.59526   2
 -34  -8   0 14.0300 3.02203   9
  34  -8   0 14.8438 5.90000   6
 -34  -8   0 9.55650 7.91737   2
  34  -8   0 15.5285 5.18589   2
  34  -8   0 9.05140 2.61710   5
 -34  -8   0 13.8661 3.74056   8
  34   8   0 8.03847 4.16142   9
 -34   8   0 10.2050 4.58490   9
  34   8   0 17.1701 4.59412   7
 -34   8   0 9.06477 3.91827   9
 -34   8   0 18.4804 4.22912   8
  34   8   0 12.1467 3.16705   3
 -34   8   0 8.49508 2.61575   4
  34   8   0 6.65053 6.82991   2
 -34   8   0 12.7413 5.88406   2
  34   8   0 12.6267 4.01187   9
  34   8   0 18.5510 4.45439   6
  36  -8   0 19.4819 7.31996   2
 -36  -8   0 30.7377 5.83050   8
  36  -8   0 30.1356 4.94193   5
 -36  -8   0 26.6662 3.36864   9
  36  -8   0 36.1867 6.52911   6
 -36  -8   0 28.0398 3.29093   9
 -36  -8   0 27.4097 9.21257   2
 -36  -8   0 28.7547 8.87869   2
  36   8   0 35.0991 8.63079   2
 -36   8   0 30.7635 4.95654   8
  36   8   0 42.3922 8.55393   9
  36   8   0 29.8148 5.12388   6
 -36   8   0 32.5444 9.35568   9
  36   8   0 32.8170 8.90628   9
 -36   8   0 31.6040 5.15781   4
  36   8   0 33.3547 5.44835   3
 -36   8   0 38.3777 11.6414   2
 -36   8   0 32.9836 7.83140   9
  38  -8   0 -0.4923 8.65177   2
 -38  -8   0 -5.9996 5.50304   2
 -38  -8   0 3.02813 3.60078   8
  38  -8   0 -0.0581 3.82028   6
 -38  -8   0 1.39664 2.08040   9
  38  -8   0 -1.5842 2.96684   5
 -38  -8   0 -0.0771 1.85495   9
  38  -8   0 -2.4222 5.80192   2
 -38  -8   0 12.4216 9.62299   2
 -38   8   0 -0.5463 3.05212   8
 -38   8   0 1.82116 5.62763   9
 -38   8   0 -1.1797 6.60628   2
  38   8   0 4.27706 3.12895   6
  38   8   0 -3.6602 8.92147   2
 -38   8   0 -2.0690 2.94613   4
  38   8   0 1.24250 5.07903   9
  38   8   0 1.98129 5.09782   9
 -38   8   0 0.84615 4.58962   9
  38   8   0 0.35807 3.02760   3
 -40  -8   0 28.6760 4.09408   9
 -40  -8   0 30.5268 6.91205   8
  40  -8   0 38.4142 7.71446   6
  40  -8   0 28.7741 5.92457   5
  40  -8   0 41.1457 12.4445   2
  40  -8   0 11.8064 11.6253   2
 -40  -8   0 34.9537 4.33418   9
 -40  -8   0 45.2443 11.0539   2
  40   8   0 38.5584 10.9951   2
  40   8   0 29.1978 6.26129   9
  40   8   0 42.3511 6.34346   6
 -40   8   0 24.7632 5.88679   8
 -40   8   0 15.0620 8.55015   2
 -40   8   0 23.6682 6.76558   9
 -40   8   0 36.8183 6.26713   4
  40   8   0 30.3505 6.30041   9
  40   8   0 27.9806 6.39412   3
  42  -8   0 44.5982 8.66466   6
 -42  -8   0 33.2112 4.83044   9
 -42  -8   0 50.8503 7.79680   8
 -42  -8   0 29.5552 4.51411   9
  42  -8   0 36.3353 6.72704   5
 -42  -8   0 29.7593 7.53124   2
  42  -8   0 26.7295 8.11643   2
 -42   8   0 42.5705 6.80303   8
  42   8   0 29.4006 18.4869   2
  42   8   0 24.0872 7.03316   9
 -42   8   0 29.2805 6.59915   9
 -42   8   0 54.2027 7.05471   4
  42   8   0 36.4452 7.02477   6
  42   8   0 37.8332 6.97782   3
 -42   8   0 53.2857 14.9710   2
  42   8   0 33.5732 7.07521   9
 -42   8   0 15.7992 7.61471   9
  44  -8   0 2.45195 5.27048   6
 -44  -8   0 -7.3942 7.43744   2
 -44  -8   0 0.32848 2.78221   9
 -44  -8   0 -0.5549 2.56885   9
  44  -8   0 0.33188 4.25317   5
 -44  -8   0 1.57816 4.87528   8
  44  -8   0 6.67261 8.70359   2
  44   8   0 4.22931 4.31053   6
 -44   8   0 0.36810 4.16104   4
 -44   8   0 -0.2640 4.17172   8
  44   8   0 1.41750 4.03317   3
 -46  -8   0 38.3057 9.30836   2
 -46  -8   0 28.3126 5.43987   9
  46  -8   0 40.1616 8.17490   6
 -46  -8   0 6.47568 6.36072   8
 -46  -8   0 27.2972 5.12904   9
  46  -8   0 24.3336 5.27159   5
  46  -8   0 26.2857 9.92357   2
 -46   8   0 37.4525 8.31898   8
  46   8   0 28.7804 5.45310   6
  46   8   0 32.8450 8.31987   3
 -46   8   0 33.8837 8.46612   4
 -48  -8   0 -0.1910 3.03982   9
  48  -8   0 -2.5765 5.44816   5
 -48  -8   0 2.64291 3.31319   9
  48  -8   0 4.79448 6.50856   6
  48  -8   0 -5.3669 10.7238   2
 -48  -8   0 -2.1912 6.13543   8
 -48  -8   0 3.47725 9.77564   2
  48   8   0 1.73997 7.40077   3
 -48   8   0 1.93461 5.22653   4
  48   8   0 -0.1892 5.56018   6
 -48   8   0 -1.6998 5.40395   8
 -50  -8   0 45.3043 11.9840   8
  50  -8   0 33.2844 7.01547   5
  50  -8   0 45.5488 12.1700   6
  50  -8   0 55.4258 13.3342   2
 -50  -8   0 72.0361 20.1072   2
 -50   8   0 47.4788 10.4763   8
  50   8   0 60.4347 11.5653   6
  50   8   0 66.2144 10.4628   3
   1   9   0 227.668 10.2993   7
   1   9   0 224.510 10.3660   4
  -1   9   0 204.070 10.5873   6
  -1   9   0 238.492 10.1404   5
  -1   9   0 232.384 10.3466   4
   1   9   0 221.417 10.3085   6
  -1   9   0 230.602 10.3346   7
   1   9   0 226.662 10.2137   8
  -1   9   0 228.822 10.2619   3
   1   9   0 223.241 10.2867   3
   1   9   0 230.046 10.2115   5
  -1   9   0 238.679 10.2103   8
  -3  -9   0 291.828 13.3374   8
   3  -9   0 290.718 13.4196   6
   3   9   0 304.667 13.4041   3
  -3   9   0 296.948 13.3552   4
  -3   9   0 298.178 13.1148   5
  -3   9   0 313.302 13.3956   6
   3   9   0 298.472 13.3120   7
  -3   9   0 293.979 13.2240   8
   3   9   0 304.268 13.3218   5
   3   9   0 284.109 14.0773   8
   3   9   0 315.932 13.3748   6
  -3   9   0 297.191 13.2661   3
  -5  -9   0 249.139 10.9566   8
   5  -9   0 223.557 11.0275   6
   5   9   0 243.862 10.8474   7
   5   9   0 238.915 10.9909   3
  -5   9   0 242.580 10.8012   8
  -5   9   0 232.941 10.9706   6
  -5   9   0 257.623 10.8031   3
   5   9   0 238.872 10.9273   6
  -5   9   0 251.542 10.9111   4
  -5   9   0 250.957 10.6017   5
   5   9   0 224.465 11.7783   5
   5   9   0 241.889 10.9049   8
   7  -9   0 24.2436 2.12752   2
   7  -9   0 21.6059 1.79592   5
   7  -9   0 20.7518 2.53439   6
   7  -9   0 22.4391 2.07787   2
  -7  -9   0 24.4108 2.31088   2
  -7  -9   0 26.3422 1.99983   2
  -7  -9   0 23.5125 2.27998   8
   7   9   0 20.7619 2.64167   5
   7   9   0 25.0883 2.39261   8
  -7   9   0 22.0336 2.60544   6
  -7   9   0 21.9641 2.39499   2
   7   9   0 25.4316 3.06088   2
  -7   9   0 22.2087 2.20759   4
  -7   9   0 25.1953 2.18534   8
   7   9   0 26.8659 2.55217   6
  -7   9   0 25.8251 1.92300   3
   7   9   0 23.8117 2.07820   7
   7   9   0 21.1087 2.36835   3
   7   9   0 24.9024 2.93310   2
   9  -9   0 173.184 8.25866   6
   9  -9   0 159.491 7.60363   5
   9  -9   0 179.940 8.05664   2
  -9  -9   0 172.490 7.97962   2
   9  -9   0 174.821 8.07183   2
  -9  -9   0 167.672 8.15708   2
  -9  -9   0 163.240 8.07202   8
   9   9   0 169.607 8.08283   6
   9   9   0 164.767 7.84889   7
   9   9   0 167.677 8.25347   5
  -9   9   0 178.907 7.96002   4
   9   9   0 186.990 8.14007   8
  -9   9   0 185.340 8.17144   2
  -9   9   0 165.529 8.40167   2
  -9   9   0 174.847 7.92490   8
   9   9   0 167.888 8.46142   2
   9   9   0 172.264 8.15983   3
  -9   9   0 166.578 8.15601   6
  11  -9   0 -0.3353 1.43885   2
 -11  -9   0 1.27371 1.28734   2
 -11  -9   0 -0.3624 1.47883   7
 -11  -9   0 0.35238 1.70485   2
 -11  -9   0 -1.0068 1.15544   8
  11  -9   0 1.19152 1.42037   6
  11  -9   0 1.10029 1.46082   4
  11  -9   0 0.44468 1.49686   2
 -11   9   0 0.81272 1.43199   6
  11   9   0 -0.0676 0.78650   9
 -11   9   0 -0.3521 1.76983   2
  11   9   0 0.74001 1.59979   5
 -11   9   0 0.23080 0.83155   9
  11   9   0 -0.8104 0.94660   7
  11   9   0 1.56014 1.42201   8
 -11   9   0 0.01203 0.87703   3
 -11   9   0 -0.6568 0.81175   9
  11   9   0 0.13312 1.00856   9
  11   9   0 0.62788 2.30354   2
 -11   9   0 -1.0805 1.03388   4
  11   9   0 0.22727 1.31355   3
 -13  -9   0 6.77601 2.18421   2
 -13  -9   0 3.57915 1.58728   2
 -13  -9   0 4.39176 1.48570   7
  13  -9   0 1.82075 1.53799   6
  13  -9   0 3.78144 1.85140   2
 -13  -9   0 3.99988 1.42765   8
  13  -9   0 3.73713 1.76591   2
  13  -9   0 5.05269 1.66115   4
  13  -9   0 4.73561 0.90938   5
  13   9   0 4.86343 1.60176   8
  13   9   0 5.81803 1.93527   5
 -13   9   0 4.81725 0.86677   3
 -13   9   0 2.98111 1.66780   6
  13   9   0 5.00820 1.23069   9
 -13   9   0 1.73989 1.18795   4
  13   9   0 5.47604 2.56441   2
  13   9   0 4.34836 1.10012   9
  13   9   0 5.51796 1.44078   3
 -13   9   0 2.94540 1.19079   9
 -13   9   0 2.37481 2.06307   2
  13   9   0 5.25454 1.08777   7
 -13   9   0 5.03508 1.23650   9
 -15  -9   0 22.0250 2.78029   8
 -15  -9   0 26.7020 5.04647   2
  15  -9   0 22.9923 3.68579   2
  15  -9   0 26.0690 3.78503   2
  15  -9   0 25.9142 3.21305   6
 -15  -9   0 26.9401 2.96629   7
  15  -9   0 20.9487 3.20659   4
  15  -9   0 20.8660 1.99698   5
 -15  -9   0 26.8688 3.22658   2
 -15   9   0 22.3441 3.39216   6
 -15   9   0 29.6835 4.19192   2
 -15   9   0 27.2810 2.87541   9
  15   9   0 26.7864 2.38938   7
 -15   9   0 26.0168 2.70607   9
  15   9   0 26.5684 2.58269   9
  15   9   0 25.9170 5.18253   2
 -15   9   0 25.8875 1.64923   3
  15   9   0 26.7193 2.91679   3
 -15   9   0 23.6443 2.48462   4
  15   9   0 31.3686 2.74869   9
  15   9   0 28.4414 3.77588   5
  15   9   0 25.4090 3.27322   8
  17  -9   0 11.3218 2.06073   6
 -17  -9   0 11.3330 2.99658   7
 -17  -9   0 18.2832 4.67013   2
  17  -9   0 8.63859 3.27435   2
  17  -9   0 11.5415 2.42348   2
  17  -9   0 13.5769 3.32658   4
 -17  -9   0 16.9195 3.27589   2
  17  -9   0 10.4994 1.85428   5
 -17  -9   0 12.6070 2.64791   8
 -17   9   0 15.9720 3.09660   9
 -17   9   0 9.09955 2.04594   8
  17   9   0 15.3772 2.17859   7
 -17   9   0 15.7322 2.38719   4
  17   9   0 12.6762 3.39510   2
  17   9   0 13.4060 2.75995   3
  17   9   0 13.4894 2.07425   6
  17   9   0 12.6302 3.24886   4
 -17   9   0 9.27650 2.12148   6
 -17   9   0 8.10777 1.63033   9
 -17   9   0 11.6315 1.14731   3
  17   9   0 12.3904 2.54026   5
  17   9   0 11.7644 2.65197   9
  17   9   0 10.4885 2.90126   9
 -17   9   0 8.25372 2.74265   2
  17   9   0 16.9118 3.44133   8
  19  -9   0 46.2450 4.99825   2
  19  -9   0 39.7892 3.95668   6
 -19  -9   0 40.2793 3.56594   8
 -19  -9   0 41.0965 5.98560   2
 -19  -9   0 32.6420 3.75931   7
 -19  -9   0 38.6706 4.19196   2
  19  -9   0 33.3372 4.03119   4
  19  -9   0 36.3894 2.69948   5
  19  -9   0 34.6247 4.74650   2
  19   9   0 36.8450 6.14504   4
  19   9   0 32.6546 2.88932   7
  19   9   0 35.2435 3.51068   9
  19   9   0 33.7901 2.86873   6
 -19   9   0 38.6795 4.49383   6
  19   9   0 37.9947 3.55310   3
 -19   9   0 39.8644 3.12111   4
 -19   9   0 35.0520 5.41537   2
 -19   9   0 39.5292 2.87302   8
 -19   9   0 33.4961 3.92723   9
  19   9   0 36.3834 3.79624   9
  19   9   0 37.1612 6.57852   2
 -19   9   0 34.4545 3.56305   9
 -21  -9   0 117.649 6.29428   7
 -21  -9   0 89.2845 8.16081   2
  21  -9   0 103.959 7.43824   2
  21  -9   0 101.024 5.36204   5
 -21  -9   0 95.2004 6.64348   2
  21  -9   0 101.236 6.33260   6
  21  -9   0 118.742 7.30187   2
  21  -9   0 114.669 6.50870   4
 -21  -9   0 119.103 6.15096   8
  21   9   0 99.4365 5.47688   7
  21   9   0 107.391 7.25684   5
 -21   9   0 108.780 6.03950   9
  21   9   0 99.6161 6.43747   4
  21   9   0 109.803 5.47391   6
  21   9   0 104.058 6.26644   9
  21   9   0 112.434 6.68197   8
 -21   9   0 82.2267 7.09789   4
  21   9   0 103.735 6.05994   9
  21   9   0 99.7862 6.00411   3
 -21   9   0 104.704 7.72527   2
 -21   9   0 110.080 6.63430   6
 -21   9   0 111.058 5.48153   8
 -21   9   0 104.141 6.22476   9
  21   9   0 108.970 8.81302   2
 -23  -9   0 14.8515 4.50138   2
 -23  -9   0 16.7065 3.52576   8
  23  -9   0 12.1438 3.31672   2
  23  -9   0 13.6744 2.85197   4
 -23  -9   0 12.4066 4.07487   2
  23  -9   0 15.2811 3.74595   2
  23  -9   0 11.2176 2.55181   5
 -23  -9   0 11.1187 2.60834   7
  23  -9   0 14.3186 2.61527   6
  23   9   0 10.2604 5.11194   2
  23   9   0 13.6121 4.03857   9
 -23   9   0 6.54537 3.64488   2
  23   9   0 15.2534 2.75523   7
  23   9   0 19.3175 3.62611   5
  23   9   0 23.0690 3.47041   3
  23   9   0 15.2096 2.80708   4
 -23   9   0 17.6098 2.96562   4
 -23   9   0 10.9348 2.60353   9
 -23   9   0 14.1371 2.68679   8
  23   9   0 12.3514 2.70762   6
 -23   9   0 14.1755 2.99979   6
  23   9   0 8.33966 2.92126   8
 -23   9   0 11.0347 2.38290   9
  23   9   0 13.0274 2.54906   9
  25  -9   0 23.1039 6.56831   2
 -25  -9   0 28.9923 5.28122   2
 -25  -9   0 27.3883 4.86228   7
  25  -9   0 27.7985 4.48916   6
 -25  -9   0 20.9118 5.10932   2
  25  -9   0 21.6393 5.31425   4
  25  -9   0 23.1151 5.90484   2
  25  -9   0 25.3304 3.11568   5
 -25  -9   0 24.1956 3.93506   8
  25   9   0 20.0364 3.78533   3
 -25   9   0 28.6192 7.20271   2
  25   9   0 27.5570 3.19451   6
 -25   9   0 30.9776 3.76827   8
 -25   9   0 15.7211 4.60571   9
 -25   9   0 30.9011 5.17494   9
  25   9   0 18.2753 5.21219   2
  25   9   0 33.3688 4.91411   9
  25   9   0 25.0063 3.30231   7
 -25   9   0 29.6565 3.42605   4
  25   9   0 23.5411 5.05974   9
  27  -9   0 25.0175 4.66860   6
  27  -9   0 17.3637 3.21279   5
  27  -9   0 14.6232 3.56436   4
 -27  -9   0 15.6209 3.29146   7
  27  -9   0 17.9537 4.65355   2
 -27  -9   0 14.2778 3.97123   8
 -27  -9   0 18.9182 5.57555   2
 -27  -9   0 13.4250 5.26431   2
  27  -9   0 27.0014 6.43143   2
  27   9   0 14.4047 5.78624   2
  27   9   0 18.9342 5.36299   9
 -27   9   0 12.7664 4.51604   2
 -27   9   0 12.7219 3.36697   9
  27   9   0 17.5127 3.28633   6
 -27   9   0 18.8227 3.27278   8
  27   9   0 15.3314 3.42959   7
  27   9   0 20.0675 3.79642   3
 -27   9   0 20.0209 5.08161   9
  27   9   0 12.1720 3.21688   9
 -27   9   0 16.7340 3.51496   4
 -29  -9   0 21.4679 4.49455   7
  29  -9   0 19.5449 4.40935   2
  29  -9   0 16.0871 4.07439   4
  29  -9   0 18.9580 5.05245   6
  29  -9   0 16.1364 4.97809   2
  29  -9   0 18.8956 3.55240   5
 -29  -9   0 19.4425 4.48279   8
 -29  -9   0 10.6581 5.69182   2
 -29  -9   0 23.8475 6.20006   2
 -29   9   0 16.7171 3.56084   8
 -29   9   0 19.6917 3.77871   4
  29   9   0 15.3136 3.63277   6
  29   9   0 8.80594 6.25231   2
 -29   9   0 12.9825 3.80940   9
  29   9   0 23.0653 6.18051   9
  29   9   0 19.9287 4.15136   3
  29   9   0 20.6409 3.77748   7
  29   9   0 15.0267 3.60509   9
 -29   9   0 23.5322 5.79498   9
 -29   9   0 9.85562 5.02127   2
 -31  -9   0 122.004 7.64811   8
  31  -9   0 120.704 11.5602   2
  31  -9   0 131.758 8.22114   6
 -31  -9   0 126.613 9.16855   7
  31  -9   0 126.430 6.87858   5
  31  -9   0 111.702 10.1027   2
 -31  -9   0 121.735 9.37649   2
 -31  -9   0 109.137 12.8608   2
  31   9   0 111.593 7.36426   3
  31   9   0 116.774 9.12921   9
 -31   9   0 113.370 8.64081   9
  31   9   0 100.766 13.2371   2
 -31   9   0 117.102 9.51112   9
 -31   9   0 117.785 6.99556   4
 -31   9   0 118.375 6.87100   8
  31   9   0 124.252 6.95368   6
  31   9   0 131.933 8.87662   9
 -31   9   0 112.396 11.4560   2
  31   9   0 111.628 6.92981   7
  33  -9   0 118.760 13.1492   6
  33  -9   0 142.337 7.84358   5
 -33  -9   0 126.510 11.9208   7
 -33  -9   0 117.646 14.6040   2
  33  -9   0 143.240 11.2661   2
 -33  -9   0 154.987 10.8817   2
  33  -9   0 149.519 13.3022   2
  33   9   0 139.920 8.33642   3
 -33   9   0 143.630 7.81893   8
 -33   9   0 139.668 9.92840   9
 -33   9   0 134.275 10.7679   9
  33   9   0 125.719 15.0365   2
  33   9   0 139.703 7.86194   6
 -33   9   0 128.358 7.94015   4
  33   9   0 122.993 10.0210   9
  33   9   0 142.248 7.92265   7
 -33   9   0 162.691 12.7596   2
  33   9   0 126.771 10.3244   9
 -35  -9   0 5.11476 5.05842   2
  35  -9   0 5.10815 2.86990   5
  35  -9   0 12.6605 7.13274   2
  35  -9   0 5.13839 5.67711   2
  35  -9   0 3.92067 3.67569   6
 -35  -9   0 5.30148 3.51454   8
 -35   9   0 10.7169 4.43892   9
 -35   9   0 5.38098 6.81880   2
  35   9   0 4.48167 8.24338   2
 -35   9   0 6.06626 2.85855   8
 -35   9   0 6.96997 2.82448   4
  35   9   0 6.08621 2.93540   3
  35   9   0 6.57461 2.84796   6
 -35   9   0 4.34942 5.39508   9
  35   9   0 1.26699 4.65681   9
  35   9   0 7.48476 4.84854   9
  35   9   0 11.9370 3.00087   7
 -37  -9   0 85.2801 14.6916   2
  37  -9   0 117.038 7.60541   5
  37  -9   0 108.438 9.21227   6
 -37  -9   0 130.291 8.71151   8
  37  -9   0 101.842 12.6950   2
  37   9   0 110.957 11.6002   9
  37   9   0 75.8664 17.6876   2
 -37   9   0 113.939 7.71321   4
 -37   9   0 92.7875 10.5352   9
  37   9   0 109.407 7.59551   6
  37   9   0 111.615 8.04158   3
 -37   9   0 123.371 14.9638   2
 -37   9   0 109.852 7.44345   8
 -37   9   0 104.724 11.9388   9
  37   9   0 108.784 11.2978   9
  39  -9   0 -1.2896 4.28313   6
  39  -9   0 4.86341 3.55954   5
 -39  -9   0 6.79780 4.24196   8
 -39  -9   0 2.06272 12.1634   2
 -39  -9   0 -4.5467 5.68205   2
  39  -9   0 -3.7687 6.71193   2
 -39   9   0 2.33471 3.44910   4
  39   9   0 6.01494 3.51123   6
 -39   9   0 1.08808 8.64344   2
  39   9   0 3.74437 6.14613   9
  39   9   0 7.12837 3.71784   3
  39   9   0 0.68342 5.91797   9
  39   9   0 -11.386 10.3743   2
 -39   9   0 3.30717 3.38405   8
 -39   9   0 9.86028 5.59246   9
 -39   9   0 4.65370 6.67572   9
 -41  -9   0 5.63688 4.56377   8
  41  -9   0 6.77227 4.92809   6
 -41  -9   0 1.28953 6.66249   2
  41  -9   0 5.57989 3.98217   5
  41  -9   0 8.80608 7.93131   2
 -41   9   0 2.41495 3.75932   4
 -41   9   0 9.32920 3.83717   8
 -41   9   0 3.03456 7.79726   9
  41   9   0 1.56259 6.96717   9
  41   9   0 0.86805 6.90645   9
 -41   9   0 1.00836 6.41861   9
  41   9   0 2.82179 3.75613   3
 -43  -9   0 5.69354 5.10987   8
  43  -9   0 6.28426 4.48787   5
  43  -9   0 8.47801 8.48823   2
 -43  -9   0 8.48182 7.45886   2
  43  -9   0 5.48699 5.47438   6
 -43   9   0 9.12023 4.35648   8
 -43   9   0 1.55826 4.21450   4
  43   9   0 3.46851 4.12947   3
  43   9   0 1.87155 4.27243   6
  45  -9   0 -5.9116 4.99854   5
  45  -9   0 4.49923 9.36897   2
  45  -9   0 -1.2177 7.78217   6
 -45  -9   0 -4.9688 8.19611   2
 -45  -9   0 0.45903 6.58645   8
  45   9   0 3.04834 4.75722   6
 -45   9   0 -6.9880 4.61056   8
  45   9   0 -0.7803 4.62025   3
 -45   9   0 2.98960 4.71017   4
  47  -9   0 19.7196 10.7436   2
 -47  -9   0 18.1676 6.72170   8
 -47  -9   0 10.4495 9.67958   2
  47  -9   0 28.0970 6.16550   5
  47  -9   0 31.4127 7.19470   6
 -47   9   0 23.2365 5.82404   8
 -47   9   0 20.8876 5.60994   4
  47   9   0 27.0136 5.90941   6
  47   9   0 11.4785 5.39293   3
 -49  -9   0 -1.0785 10.6566   2
 -49  -9   0 0.88379 10.7641   8
  49  -9   0 -3.6229 16.6265   2
  49  -9   0 -0.1255 6.45730   5
  49  -9   0 0.64697 9.81389   6
  49   9   0 4.15548 6.46970   6
 -49   9   0 6.16456 6.07632   4
 -49   9   0 1.28208 6.24082   8
  49   9   0 -2.8668 5.68878   3
   0  10   0 57.4660 3.65835   6
   0  10   0 58.8131 3.55578   4
   0  10   0 51.1918 3.33001   8
   0  10   0 55.3738 3.32326   5
   0  10   0 59.3620 3.49895   7
   0  10   0 56.5852 3.39840   3
   2  10   0 2.99535 1.36480   4
   2  10   0 4.46623 1.26502   8
  -2  10   0 5.37331 1.45086   6
   2  10   0 3.01936 1.58681   6
   2  10   0 3.31629 1.18831   3
   2  10   0 4.31018 1.25675   7
  -2  10   0 3.66428 1.10681   5
  -2  10   0 5.46831 1.16397   3
  -2  10   0 7.25428 1.38153   7
  -2  10   0 4.39326 1.21712   8
   2  10   0 8.67253 2.13216   5
  -2  10   0 3.05571 1.27655   4
  -4 -10   0 47.3422 3.20983   8
   4 -10   0 55.5402 3.52632   6
   4  10   0 54.2381 3.99882   6
   4  10   0 50.4596 4.17651   5
  -4  10   0 49.8446 3.02841   3
   4  10   0 50.9914 3.30469   3
  -4  10   0 48.3565 2.75263   5
   4  10   0 46.2627 3.21856   8
  -4  10   0 45.9504 3.04915   8
  -4  10   0 54.4428 3.28406   4
   4  10   0 49.4299 3.15891   7
  -4  10   0 46.0978 3.49187   6
  -6 -10   0 20.9011 2.40705   8
   6 -10   0 16.0381 2.74700   6
   6  10   0 22.5964 2.25994   7
  -6  10   0 17.5592 2.34442   4
   6  10   0 22.2514 2.52002   3
  -6  10   0 21.8854 1.61272   5
   6  10   0 25.5936 2.51914   8
   6  10   0 20.4048 2.76160   6
  -6  10   0 20.3383 2.81619   6
   6  10   0 23.8015 2.87380   5
  -6  10   0 23.0901 2.08715   3
  -6  10   0 19.3327 2.21835   8
  -8 -10   0 -0.7800 1.28021   2
   8 -10   0 0.56066 1.09116   2
  -8 -10   0 1.30942 1.10037   2
  -8 -10   0 1.27897 1.29547   8
   8 -10   0 0.12676 1.45589   6
   8  10   0 0.52648 1.06547   7
  -8  10   0 1.72725 1.17899   4
   8  10   0 3.19693 1.75865   6
  -8  10   0 -1.7900 0.90738   3
   8  10   0 1.36495 1.64465   5
   8  10   0 0.75695 1.24014   3
  -8  10   0 0.90983 1.23641   8
  -8  10   0 -2.0588 1.49926   6
   8  10   0 1.67719 2.32999   2
   8  10   0 1.18874 1.41928   8
 -10 -10   0 245.408 10.3029   2
  10 -10   0 215.234 10.3921   6
  10 -10   0 221.874 10.1308   2
  10 -10   0 213.162 9.59828   5
 -10 -10   0 218.426 10.2173   8
  10 -10   0 199.418 10.0866   2
 -10 -10   0 215.561 10.0498   2
  10  10   0 211.221 11.2555   6
 -10  10   0 235.516 10.0838   4
  10  10   0 236.727 10.3442   3
 -10  10   0 212.300 9.98827   8
 -10  10   0 222.434 10.2379   2
 -10  10   0 220.992 9.80999   3
 -10  10   0 213.917 10.3066   6
  10  10   0 226.352 10.4356   5
  10  10   0 217.938 10.2411   8
  10  10   0 213.517 10.6515   2
  10  10   0 209.202 9.92750   7
 -12 -10   0 0.75922 1.53270   7
 -12 -10   0 2.55507 1.46645   8
 -12 -10   0 -1.7628 1.90913   2
  12 -10   0 -0.2367 1.67307   2
 -12 -10   0 1.09041 1.47838   2
  12 -10   0 0.76816 1.78043   2
  12 -10   0 0.81154 0.99394   5
  12 -10   0 -0.2752 1.90597   6
  12 -10   0 -0.2746 1.73074   4
  12  10   0 1.42473 1.10700   7
 -12  10   0 0.31019 1.12362   9
 -12  10   0 0.87068 0.92676   3
  12  10   0 3.63278 2.02128   5
 -12  10   0 0.82940 1.75878   6
  12  10   0 1.12924 1.69833   8
 -12  10   0 0.70534 2.13219   2
  12  10   0 0.99423 1.03808   9
  12  10   0 1.21003 2.66873   2
 -12  10   0 -0.0709 1.16322   4
  12  10   0 1.42570 1.50275   3
 -12  10   0 1.97676 1.03633   3
  12  10   0 0.31945 1.26617   9
 -14 -10   0 11.2059 2.54152   2
 -14 -10   0 10.1156 2.98527   2
 -14 -10   0 15.9195 2.70223   8
  14 -10   0 9.05178 2.03784   6
 -14 -10   0 14.9848 2.88425   7
  14 -10   0 15.1221 1.59290   5
  14 -10   0 13.2170 3.41481   2
  14 -10   0 15.0375 3.59388   2
  14 -10   0 10.2024 2.14531   4
 -14  10   0 15.5776 2.38358   4
  14  10   0 14.0058 2.39105   9
 -14  10   0 15.2229 1.66415   3
 -14  10   0 7.87290 2.62222   9
 -14  10   0 12.1407 1.60019   3
 -14  10   0 9.53438 2.62463   9
  14  10   0 13.3165 2.58312   9
 -14  10   0 13.4820 2.65277   2
  14  10   0 7.86854 2.14870   7
  14  10   0 8.03137 2.40858   5
  14  10   0 17.2065 2.84251   3
 -14  10   0 15.6297 3.51462   6
  14  10   0 15.3324 3.19296   8
  14  10   0 14.1672 3.34404   2
 -16 -10   0 10.8315 2.86785   8
  16 -10   0 5.30026 2.01116   6
 -16 -10   0 7.21168 2.79918   2
  16 -10   0 5.92047 1.10973   5
  16 -10   0 7.70291 2.31412   2
 -16 -10   0 7.41327 2.05969   2
 -16 -10   0 4.97049 1.87386   7
  16 -10   0 4.62382 2.10886   4
  16 -10   0 8.25813 2.50655   2
 -16  10   0 5.65985 1.30294   3
  16  10   0 0.55592 3.46432   2
  16  10   0 5.22884 1.58295   9
 -16  10   0 6.54637 1.49730   4
 -16  10   0 4.62737 1.31760   8
  16  10   0 7.57032 1.39553   7
 -16  10   0 5.79521 1.36408   3
  16  10   0 10.0846 2.52877   5
  16  10   0 8.38816 2.18230   8
  16  10   0 3.68369 1.99554   4
 -16  10   0 6.68573 1.88348   9
 -16  10   0 6.21728 2.88248   2
  16  10   0 5.21191 1.68850   9
 -16  10   0 5.49882 2.14736   6
 -16  10   0 4.28770 1.76928   9
  16  10   0 5.92607 1.79222   3
  18 -10   0 48.8889 3.11209   5
  18 -10   0 51.0861 4.55799   6
 -18 -10   0 50.1953 4.52908   2
  18 -10   0 59.9015 5.42066   2
  18 -10   0 48.8552 5.09057   2
 -18 -10   0 67.5242 6.12350   2
 -18 -10   0 51.0294 4.32255   7
  18 -10   0 46.6823 4.61229   4
 -18 -10   0 51.6659 4.09950   8
  18  10   0 45.1922 3.34433   6
 -18  10   0 53.5730 4.87075   6
  18  10   0 53.2819 4.81296   8
  18  10   0 42.9040 7.10688   2
  18  10   0 46.6575 4.29516   9
 -18  10   0 57.8361 4.45046   9
  18  10   0 51.3780 3.98205   9
 -18  10   0 43.6761 5.92923   2
  18  10   0 65.8108 4.78095   4
 -18  10   0 53.6512 3.62519   4
 -18  10   0 55.1425 3.38283   8
  18  10   0 44.2926 4.08651   3
 -18  10   0 51.9026 4.00372   9
  18  10   0 45.5704 3.42859   7
  18  10   0 57.1010 5.79786   5
 -20 -10   0 14.8004 4.01779   2
  20 -10   0 17.1277 5.22496   2
 -20 -10   0 7.28415 2.09885   8
  20 -10   0 17.9268 4.73673   2
  20 -10   0 9.77723 2.64738   4
 -20 -10   0 14.8172 3.96682   7
 -20 -10   0 20.2983 3.92731   2
  20 -10   0 13.5714 2.29453   5
  20 -10   0 16.2107 3.94512   6
  20  10   0 22.5906 4.43672   8
 -20  10   0 10.6782 2.38541   9
  20  10   0 11.8617 2.37653   9
 -20  10   0 10.6150 2.33767   4
 -20  10   0 8.50810 2.19384   9
  20  10   0 15.5188 3.38956   3
  20  10   0 12.4280 3.21206   5
  20  10   0 14.7220 2.72174   4
  20  10   0 12.9363 2.55638   6
  20  10   0 13.2403 3.46698   9
  20  10   0 17.8904 4.52363   2
 -20  10   0 9.63394 2.52354   8
  20  10   0 12.7464 2.64908   7
 -20  10   0 8.30723 3.56727   2
 -20  10   0 14.3552 2.81278   6
 -22 -10   0 229.416 11.4955   7
 -22 -10   0 234.855 11.9712   2
  22 -10   0 242.701 12.3635   2
 -22 -10   0 239.160 11.4327   8
  22 -10   0 240.824 10.7095   5
  22 -10   0 214.395 12.5103   2
  22 -10   0 237.271 11.7095   6
  22 -10   0 235.889 11.7114   4
 -22 -10   0 242.554 13.0960   2
  22  10   0 223.755 13.9057   2
  22  10   0 218.866 11.3381   9
  22  10   0 223.669 12.4863   5
 -22  10   0 222.684 11.2991   9
  22  10   0 219.602 11.4778   9
 -22  10   0 238.851 10.9707   4
 -22  10   0 244.099 10.8646   8
  22  10   0 219.795 12.4078   4
  22  10   0 239.057 10.8383   6
 -22  10   0 236.228 12.9644   2
  22  10   0 235.783 10.8614   7
  22  10   0 249.240 12.0146   8
 -22  10   0 262.319 11.5871   9
  22  10   0 232.054 11.3977   3
  24 -10   0 68.7064 5.72782   6
  24 -10   0 64.8637 4.20124   5
 -24 -10   0 65.6256 5.90147   7
 -24 -10   0 56.8919 6.10253   2
 -24 -10   0 69.6142 5.14983   8
  24 -10   0 59.7507 6.66805   2
 -24 -10   0 62.2241 8.54296   2
  24 -10   0 73.7811 8.41385   2
  24 -10   0 57.3371 6.13297   4
  24  10   0 65.3892 4.99148   6
 -24  10   0 65.3436 6.09379   9
  24  10   0 62.5448 6.11107   9
  24  10   0 54.8623 5.02456   3
  24  10   0 54.9461 7.08360   9
 -24  10   0 72.6948 4.34325   8
 -24  10   0 61.1377 5.64189   9
 -24  10   0 71.7057 8.27943   2
 -24  10   0 65.6725 4.54851   4
  24  10   0 60.7307 9.87965   2
 -26 -10   0 151.348 9.71972   2
  26 -10   0 156.256 9.73795   4
 -26 -10   0 161.634 9.32038   7
  26 -10   0 157.808 11.0001   2
 -26 -10   0 165.185 12.5679   2
  26 -10   0 167.051 9.25641   6
 -26 -10   0 154.851 8.89903   8
  26 -10   0 159.443 8.03821   5
  26 -10   0 159.819 10.3231   2
  26  10   0 153.232 8.05772   6
  26  10   0 151.532 8.73276   3
 -26  10   0 174.779 8.13307   8
 -26  10   0 157.146 9.57775   9
  26  10   0 163.343 9.56968   9
 -26  10   0 164.553 11.5541   2
  26  10   0 155.713 11.3727   9
  26  10   0 172.515 8.21797   7
  26  10   0 162.749 13.1633   2
 -26  10   0 166.092 8.27457   4
 -26  10   0 174.477 9.20259   9
  28 -10   0 129.979 14.2815   2
 -28 -10   0 132.040 9.21871   7
  28 -10   0 148.026 10.3909   2
 -28 -10   0 158.679 9.74138   2
  28 -10   0 137.813 9.76134   4
  28 -10   0 150.577 7.58288   5
  28 -10   0 142.733 8.85773   6
 -28 -10   0 146.849 8.55603   8
 -28 -10   0 152.170 12.4549   2
 -28  10   0 133.342 8.96877   9
  28  10   0 158.747 7.75569   7
 -28  10   0 135.544 11.7373   2
 -28  10   0 143.744 7.61443   8
 -28  10   0 147.855 7.81516   4
  28  10   0 123.823 13.5134   2
  28  10   0 152.529 8.31463   3
 -28  10   0 140.107 9.58969   9
  28  10   0 150.802 7.65128   6
  28  10   0 148.741 9.54726   9
  30 -10   0 55.2911 4.75372   5
 -30 -10   0 50.0528 7.36511   2
 -30 -10   0 63.7135 11.8487   2
  30 -10   0 48.2970 10.1070   2
  30 -10   0 65.7297 8.74114   2
 -30 -10   0 53.2556 5.87596   8
  30 -10   0 56.5423 6.45147   6
 -30 -10   0 50.9347 7.68656   7
  30  10   0 59.0761 4.86129   6
 -30  10   0 44.5486 10.8466   2
  30  10   0 42.4426 12.7368   2
  30  10   0 46.9538 11.6236   9
 -30  10   0 52.2786 4.80889   8
 -30  10   0 62.1190 5.03850   4
 -30  10   0 52.0393 7.26600   9
  30  10   0 46.7468 7.85314   9
 -30  10   0 50.7315 8.14944   9
  30  10   0 58.7192 4.99843   7
  30  10   0 64.4315 8.15204   3
  32 -10   0 206.770 10.2763   5
 -32 -10   0 199.170 16.4515   2
  32 -10   0 172.029 14.6615   2
 -32 -10   0 195.265 12.3316   7
 -32 -10   0 183.129 12.2696   2
  32 -10   0 209.106 13.5531   2
 -32 -10   0 206.506 13.9853   8
  32 -10   0 213.585 12.2939   6
 -32  10   0 195.745 9.99000   8
 -32  10   0 192.045 12.8363   9
  32  10   0 194.136 12.3937   9
  32  10   0 194.045 12.5944   9
 -32  10   0 179.934 10.1043   4
  32  10   0 196.495 10.0241   7
  32  10   0 213.100 10.0981   6
  32  10   0 204.482 10.6518   3
  32  10   0 165.335 17.2215   2
 -32  10   0 190.514 11.8602   9
 -34 -10   0 -0.5055 5.09137   2
  34 -10   0 1.69672 2.84126   5
 -34 -10   0 -3.5681 8.54446   2
 -34 -10   0 -0.7863 3.40933   8
  34 -10   0 -0.7661 3.70283   6
  34 -10   0 -1.1145 6.82582   2
 -34  10   0 -0.3117 2.76880   8
  34  10   0 -1.1346 8.79357   2
  34  10   0 -0.4527 2.86622   7
  34  10   0 1.93694 4.96215   9
 -34  10   0 -0.6825 5.61661   9
 -34  10   0 1.26852 2.77243   4
 -34  10   0 -3.8424 7.06360   2
  34  10   0 1.80126 2.91462   3
  34  10   0 0.66664 4.82485   9
 -34  10   0 -1.5730 4.55872   9
  34  10   0 -2.5413 2.70730   6
 -36 -10   0 173.245 12.9450   2
  36 -10   0 187.014 9.94513   5
  36 -10   0 162.564 11.4154   6
 -36 -10   0 194.560 11.0641   8
  36 -10   0 173.915 14.3597   2
  36  10   0 142.832 20.3610   2
 -36  10   0 178.788 14.0057   9
 -36  10   0 189.401 10.0003   4
  36  10   0 147.269 13.4810   9
 -36  10   0 176.053 9.77755   8
 -36  10   0 191.521 17.5114   2
  36  10   0 176.317 10.4186   3
  36  10   0 156.433 13.1849   9
  36  10   0 186.486 9.89832   6
 -36  10   0 174.528 12.8295   9
 -38 -10   0 1.90446 5.74801   2
  38 -10   0 3.39298 6.59615   2
  38 -10   0 -2.1798 3.52774   5
 -38 -10   0 1.99582 4.27745   8
  38 -10   0 -0.5215 9.31701   2
  38 -10   0 3.05981 4.52974   6
 -38 -10   0 -1.2123 10.9767   2
 -38  10   0 5.74828 5.69179   9
 -38  10   0 1.54600 3.36727   8
  38  10   0 5.96322 6.33608   9
 -38  10   0 0.13526 7.07236   9
  38  10   0 0.12621 3.65337   3
  38  10   0 -3.3033 6.37601   9
  38  10   0 1.13642 3.48396   6
 -40 -10   0 61.9410 12.2779   2
  40 -10   0 88.1074 8.18026   5
  40 -10   0 80.3681 14.1064   2
 -40 -10   0 83.4440 9.33959   8
  40 -10   0 96.6123 10.3657   6
  40  10   0 93.3672 8.07965   6
  40  10   0 103.289 8.47356   3
 -40  10   0 85.8358 7.74304   8
 -40  10   0 67.2361 7.87766   4
  42 -10   0 7.09227 5.77634   6
  42 -10   0 12.2723 4.72648   5
 -42 -10   0 10.9309 5.48167   8
 -42 -10   0 4.09215 7.51686   2
  42 -10   0 9.55315 8.21437   2
 -42  10   0 12.1925 4.38645   4
  42  10   0 14.3868 4.53125   6
 -42  10   0 10.8124 4.46591   8
  42  10   0 11.0278 4.45294   3
  44 -10   0 22.1495 9.37840   2
  44 -10   0 6.46168 5.32590   5
  44 -10   0 38.7269 13.7983   6
 -44 -10   0 13.9911 6.86877   8
 -44 -10   0 17.6723 8.63047   2
 -44  10   0 15.3783 5.04745   8
  44  10   0 10.1313 5.02379   3
  44  10   0 17.1219 5.04555   6
 -44  10   0 12.9972 4.91779   4
 -46 -10   0 19.7680 9.69649   2
  46 -10   0 -3.1654 9.77025   5
 -46 -10   0 36.8873 7.19240   8
  46 -10   0 44.0406 7.71359   6
  46 -10   0 24.8683 10.7746   2
 -46  10   0 44.1832 9.34605   8
  46  10   0 21.5222 5.93294   6
  46  10   0 41.9550 9.53558   3
 -46  10   0 37.9883 9.58543   4
  48 -10   0 1.55240 6.64635   5
 -48 -10   0 5.34997 12.2693   2
 -48 -10   0 2.47788 10.2005   8
  48 -10   0 3.52636 11.6144   2
 -48  10   0 -2.4276 6.16969   8
  48  10   0 3.95456 6.34629   6
 -48  10   0 7.46944 6.01858   4
  48  10   0 4.56635 5.96853   3
   1  11   0 1.99699 1.47465   4
   1  11   0 2.53347 1.57915   6
  -1  11   0 4.03848 1.44183   7
  -1  11   0 3.02423 1.43336   4
   1  11   0 3.94739 1.39783   7
  -1  11   0 1.87505 1.30807   8
   1  11   0 1.91947 1.43102   5
  -1  11   0 2.79288 1.26645   3
  -1  11   0 1.24757 1.28513   5
   1  11   0 2.62821 1.35609   8
   1  11   0 2.75586 1.32176   3
  -1  11   0 1.70465 1.56027   6
   3  11   0 130.770 6.13596   3
   3  11   0 120.250 6.18571   6
  -3  11   0 114.010 5.66149   5
   3  11   0 116.460 6.19917   5
  -3  11   0 126.412 6.12711   4
  -3  11   0 113.199 6.13531   7
   3  11   0 118.675 5.99752   7
  -3  11   0 117.658 6.21118   8
  -3  11   0 118.116 6.20646   6
   3  11   0 116.443 5.99545   8
   3  11   0 118.635 6.23601   4
  -3  11   0 121.855 5.91992   3
   5 -11   0 102.612 5.70980   6
  -5 -11   0 101.762 5.46671   8
  -5  11   0 114.988 5.74414   6
  -5  11   0 104.029 5.24283   8
  -5  11   0 100.430 4.87765   5
  -5  11   0 103.964 5.44007   4
  -5  11   0 98.7546 5.22895   3
   5  11   0 105.182 5.62273   6
   5  11   0 107.057 5.55753   3
   5  11   0 98.7186 5.33510   7
   5  11   0 102.162 5.45556   8
   5  11   0 107.877 5.67099   5
  -7 -11   0 7.02175 1.65146   8
   7 -11   0 9.82588 1.90042   6
  -7  11   0 9.28612 2.02655   3
   7  11   0 5.96135 1.77990   6
  -7  11   0 8.43110 1.53828   8
   7  11   0 8.89804 2.00426   5
   7  11   0 7.05843 1.41073   7
  -7  11   0 7.81731 1.59614   4
   7  11   0 9.18135 1.76147   8
   7  11   0 8.28931 1.63212   3
  -7  11   0 9.69164 1.92377   6
  -9 -11   0 48.7710 3.64622   8
   9 -11   0 43.3306 4.00135   6
  -9 -11   0 45.6664 3.34852   2
   9  11   0 46.7077 4.24260   5
   9  11   0 50.9788 4.44446   2
   9  11   0 56.2099 3.79919   3
   9  11   0 52.6227 3.98998   6
  -9  11   0 52.0779 3.46753   4
  -9  11   0 47.1520 3.06484   3
  -9  11   0 51.5544 3.40304   8
   9  11   0 51.7798 3.82278   8
  -9  11   0 54.1124 4.17254   6
   9  11   0 47.7657 3.24557   7
  11 -11   0 301.357 14.6202   2
 -11 -11   0 328.985 14.6205   2
  11 -11   0 330.488 15.0574   6
 -11 -11   0 316.586 14.9496   8
  11 -11   0 332.624 14.6596   2
 -11 -11   0 358.563 14.8254   2
  11  11   0 308.962 14.7757   6
  11  11   0 306.708 14.2332   9
 -11  11   0 324.355 14.9347   6
  11  11   0 328.338 14.9286   3
  11  11   0 332.692 15.2373   2
 -11  11   0 328.356 14.7883   2
  11  11   0 326.002 14.8479   8
 -11  11   0 319.678 14.3735   3
 -11  11   0 318.536 14.6281   4
  11  11   0 356.951 15.1377   5
 -11  11   0 315.397 14.5623   8
 -11  11   0 329.975 14.4411   3
  11  11   0 319.297 14.5144   7
  11  11   0 338.469 14.2319   9
  13 -11   0 2.16728 1.96767   2
 -13 -11   0 -0.4780 2.23204   2
 -13 -11   0 0.11498 1.73232   8
  13 -11   0 0.51121 1.90608   6
 -13 -11   0 -0.5540 1.67271   2
  13 -11   0 1.23072 1.87220   2
  13  11   0 0.41913 1.68739   3
  13  11   0 -0.0119 1.99442   6
  13  11   0 0.59389 1.49860   9
 -13  11   0 1.43268 1.03646   3
  13  11   0 3.01784 1.30798   9
 -13  11   0 4.48601 2.17520   6
 -13  11   0 0.87890 1.14371   3
 -13  11   0 2.00752 1.43539   9
 -13  11   0 2.66359 1.40008   9
  13  11   0 0.22025 2.36561   5
 -13  11   0 1.28863 2.45883   2
  13  11   0 -0.6067 1.95603   8
 -13  11   0 -0.4301 1.42084   4
  13  11   0 0.04679 1.27220   7
 -13  11   0 0.03608 1.98029   8
  13  11   0 3.71772 3.80620   2
  15 -11   0 197.367 10.3094   2
 -15 -11   0 192.918 9.92706   7
 -15 -11   0 218.296 10.1415   8
 -15 -11   0 215.953 10.1569   2
  15 -11   0 199.067 10.3778   6
  15 -11   0 212.297 10.3011   4
 -15 -11   0 218.774 10.7069   2
  15 -11   0 208.531 10.3771   2
 -15  11   0 211.752 9.83538   9
  15  11   0 197.865 9.65210   9
  15  11   0 219.310 10.7636   5
  15  11   0 211.402 10.2602   8
 -15  11   0 211.213 10.4279   6
 -15  11   0 210.070 9.27980   3
 -15  11   0 211.370 9.77783   4
 -15  11   0 197.452 10.9151   2
  15  11   0 215.799 9.77213   9
 -15  11   0 209.306 9.28841   3
  15  11   0 209.433 9.62361   7
 -15  11   0 196.246 9.67396   9
  15  11   0 214.025 11.5744   2
  15  11   0 216.210 10.1950   3
 -17 -11   0 130.074 6.82137   2
 -17 -11   0 116.598 6.55653   8
 -17 -11   0 121.771 7.74150   2
  17 -11   0 113.381 6.93138   4
  17 -11   0 120.745 7.27250   2
  17 -11   0 115.143 5.44794   5
  17 -11   0 118.238 7.07658   2
 -17 -11   0 121.168 6.54479   7
  17 -11   0 118.998 7.01061   6
 -17  11   0 107.252 7.05410   6
 -17  11   0 100.835 6.50021   9
 -17  11   0 120.572 8.00197   2
 -17  11   0 115.153 5.42939   3
 -17  11   0 127.848 6.15105   4
  17  11   0 107.963 7.62564   5
 -17  11   0 116.957 6.31229   9
 -17  11   0 121.861 5.88472   8
  17  11   0 111.699 6.41470   9
  17  11   0 115.455 5.93510   7
  17  11   0 113.070 6.94106   4
  17  11   0 119.074 6.26934   9
  17  11   0 113.986 7.00977   8
 -17  11   0 113.327 5.29367   3
  17  11   0 127.424 6.67976   3
  17  11   0 103.607 9.11998   2
  17  11   0 115.276 5.88648   6
 -19 -11   0 285.477 14.5539   2
 -19 -11   0 279.138 13.8085   2
  19 -11   0 278.664 13.7793   4
 -19 -11   0 305.369 13.6709   8
 -19 -11   0 274.927 13.4742   7
  19 -11   0 297.547 14.1656   2
  19 -11   0 281.083 12.7308   5
  19 -11   0 298.673 13.9293   6
  19 -11   0 296.865 14.2175   2
  19  11   0 299.194 13.9022   8
 -19  11   0 287.030 13.3197   9
  19  11   0 280.676 12.9986   6
 -19  11   0 295.776 13.5221   9
 -19  11   0 280.285 12.9834   8
 -19  11   0 269.546 13.8557   6
  19  11   0 286.614 13.3014   9
  19  11   0 285.431 13.4611   9
 -19  11   0 284.023 13.1824   4
 -19  11   0 290.923 14.6573   2
  19  11   0 299.160 13.6578   3
  19  11   0 295.397 13.8114   4
  19  11   0 285.507 13.0380   7
  19  11   0 297.006 14.3791   5
  19  11   0 277.165 15.4905   2
  21 -11   0 -1.8103 2.85484   2
 -21 -11   0 -0.5711 3.79087   2
 -21 -11   0 1.67664 2.21713   8
 -21 -11   0 1.31618 2.48876   2
  21 -11   0 -2.0301 3.16813   2
  21 -11   0 -0.4760 2.85394   4
  21 -11   0 1.88506 1.43066   5
 -21 -11   0 -1.5393 2.48879   7
  21 -11   0 0.80973 2.48789   6
 -21  11   0 -0.0340 1.58764   8
  21  11   0 2.60892 2.16385   3
 -21  11   0 0.57396 1.78632   4
  21  11   0 3.40823 5.24111   2
  21  11   0 -0.5689 2.54294   9
 -21  11   0 -1.4364 3.99273   2
  21  11   0 1.42019 2.24728   9
 -21  11   0 0.93653 2.62908   9
 -21  11   0 -0.3062 2.38531   9
  21  11   0 0.65589 1.58591   6
  21  11   0 -0.7959 1.59938   7
  23 -11   0 329.881 15.4269   6
  23 -11   0 325.934 15.4878   4
  23 -11   0 322.754 16.1648   2
 -23 -11   0 321.125 16.7251   2
 -23 -11   0 327.696 15.4964   2
 -23 -11   0 320.098 15.0817   7
 -23 -11   0 314.505 15.0561   8
  23 -11   0 330.568 15.9045   2
  23 -11   0 309.071 14.1806   5
  23  11   0 280.262 18.0032   2
  23  11   0 310.552 15.1679   9
  23  11   0 303.212 14.6186   7
 -23  11   0 305.354 14.3524   8
  23  11   0 294.839 14.9368   9
 -23  11   0 325.086 16.7085   2
  23  11   0 306.546 14.6967   6
 -23  11   0 296.098 14.9075   9
  23  11   0 352.961 15.1275   3
 -23  11   0 333.463 14.5524   4
 -23  11   0 323.633 15.1797   9
  25 -11   0 36.3667 5.75244   6
 -25 -11   0 43.3031 5.02082   8
 -25 -11   0 40.8537 5.86941   2
  25 -11   0 50.4604 7.94594   2
  25 -11   0 42.1900 6.76667   2
  25 -11   0 43.1374 3.73421   5
 -25 -11   0 39.6044 6.13897   7
  25 -11   0 46.6431 6.70102   4
 -25 -11   0 34.4962 8.99450   2
 -25  11   0 37.5029 6.44671   9
 -25  11   0 34.8142 6.24764   8
  25  11   0 46.5796 3.98730   6
 -25  11   0 39.9540 9.23148   2
  25  11   0 48.6021 4.16127   7
  25  11   0 41.3030 11.5023   2
  25  11   0 48.3472 5.03370   3
 -25  11   0 44.9880 6.08267   9
  25  11   0 49.5890 6.16843   9
 -25  11   0 44.6271 4.29772   4
  25  11   0 41.1986 6.51991   9
  27 -11   0 77.0501 8.17920   4
  27 -11   0 83.0656 7.16107   6
 -27 -11   0 93.2474 15.2130   2
  27 -11   0 84.3393 5.27240   5
 -27 -11   0 82.5185 7.54137   2
  27 -11   0 82.5822 8.36936   2
  27 -11   0 76.3972 9.55368   2
 -27 -11   0 77.8970 7.66709   7
 -27  11   0 75.3726 7.40275   9
  27  11   0 86.4749 13.4996   2
 -27  11   0 81.2407 10.7866   2
  27  11   0 74.0651 10.0221   9
 -27  11   0 88.5790 5.38268   8
  27  11   0 75.8953 5.36087   6
  27  11   0 90.0109 5.59897   7
 -27  11   0 92.0641 8.08857   9
  27  11   0 74.2566 7.85370   9
  27  11   0 98.1150 6.42878   3
 -27  11   0 79.7601 5.66235   4
 -29 -11   0 16.5444 6.54950   2
 -29 -11   0 17.7343 3.56510   8
  29 -11   0 9.93759 5.80466   2
 -29 -11   0 16.4351 4.43410   7
  29 -11   0 17.8620 4.01520   5
 -29 -11   0 13.6091 4.08566   2
  29 -11   0 10.7373 3.49162   6
  29 -11   0 11.2345 4.67190   2
  29  11   0 26.1670 7.72150   9
 -29  11   0 11.6514 6.44670   2
 -29  11   0 19.8242 4.33752   4
  29  11   0 11.4592 2.93088   3
 -29  11   0 9.09958 4.00050   9
  29  11   0 8.88020 7.94764   2
 -29  11   0 14.8524 4.73201   9
  29  11   0 9.35644 2.49296   6
  29  11   0 13.1656 2.63753   7
 -29  11   0 18.5711 3.95013   8
  31 -11   0 41.1682 4.95021   5
 -31 -11   0 47.4251 8.78012   7
  31 -11   0 28.6676 11.6894   2
 -31 -11   0 21.2778 7.65536   2
  31 -11   0 41.1005 8.99621   2
  31 -11   0 50.0828 7.09091   6
 -31 -11   0 55.3473 7.82405   2
 -31 -11   0 40.7478 6.19070   8
  31  11   0 46.2167 5.13551   7
 -31  11   0 50.9433 4.92137   8
  31  11   0 39.1471 4.94213   6
 -31  11   0 39.9446 9.73997   9
  31  11   0 29.4583 9.54307   2
  31  11   0 40.8362 9.45152   9
 -31  11   0 54.5016 12.7726   2
 -31  11   0 45.8443 8.25138   9
 -31  11   0 37.6410 5.17487   4
  31  11   0 35.3909 5.69162   3
  31  11   0 40.2156 8.72895   9
  33 -11   0 17.9172 4.38220   6
 -33 -11   0 32.5868 6.36121   8
  33 -11   0 12.8382 7.46537   2
 -33 -11   0 5.11529 8.31889   2
  33 -11   0 14.5434 5.52843   2
 -33 -11   0 11.5396 5.01212   2
  33  11   0 10.5362 10.1569   2
 -33  11   0 11.7899 4.92720   9
 -33  11   0 18.0765 3.15871   8
  33  11   0 11.3054 5.49503   9
 -33  11   0 14.5720 8.16876   2
  33  11   0 14.3598 3.45489   3
  33  11   0 21.7722 5.01926   6
  33  11   0 13.8360 5.16908   9
 -33  11   0 17.1080 3.16087   4
 -33  11   0 17.6278 7.43305   9
  33  11   0 14.3245 3.14950   7
  35 -11   0 69.4551 6.58143   5
  35 -11   0 62.2953 11.2637   2
  35 -11   0 61.3392 8.71029   6
 -35 -11   0 60.8672 10.0199   2
 -35 -11   0 79.5460 7.88999   8
 -35  11   0 61.3537 16.0578   9
  35  11   0 66.9518 6.70519   7
  35  11   0 60.8358 7.13885   3
 -35  11   0 59.3833 6.58782   4
  35  11   0 71.2228 11.1108   9
 -35  11   0 74.4095 6.22361   8
  35  11   0 72.5710 6.47941   6
 -35  11   0 42.6911 9.35305   9
  35  11   0 49.3213 11.6742   9
  37 -11   0 1.17998 4.66626   6
 -37 -11   0 -0.5689 11.0155   2
  37 -11   0 -0.0981 3.79137   5
 -37 -11   0 5.73905 4.48958   8
  37 -11   0 -1.2534 6.37280   2
  37 -11   0 -12.969 16.6248   2
 -37 -11   0 1.36336 5.90124   2
 -37  11   0 2.54656 3.49080   8
 -37  11   0 2.96107 3.49247   4
 -37  11   0 7.37604 9.41146   9
  37  11   0 2.26603 6.86580   9
  37  11   0 1.88800 6.60814   9
  37  11   0 0.73573 3.68195   3
 -37  11   0 4.81669 10.0433   9
  37  11   0 2.21861 3.52382   6
  39 -11   0 143.062 11.9370   6
 -39 -11   0 98.1593 13.7974   2
  39 -11   0 135.287 14.8659   2
 -39 -11   0 158.486 10.9700   8
 -39  11   0 154.825 9.67040   4
  39  11   0 138.239 10.1687   3
 -39  11   0 145.270 9.37195   8
  39  11   0 131.464 9.63348   6
 -41 -11   0 22.0336 7.59420   2
  41 -11   0 19.6525 6.20027   6
 -41 -11   0 19.2491 5.72363   8
  41 -11   0 22.1273 8.48192   2
  41  11   0 30.5549 8.13948   3
 -41  11   0 25.9962 7.25842   8
 -41  11   0 19.1071 4.67708   4
  41  11   0 24.7747 4.86636   6
  43 -11   0 -0.3933 8.78883   2
  43 -11   0 1.86739 10.3927   6
  43 -11   0 -1.0008 5.32740   5
 -43 -11   0 0.50099 8.06726   2
 -43  11   0 8.33973 4.95048   4
  43  11   0 5.12118 5.04999   6
 -43  11   0 -1.8498 4.81929   8
  43  11   0 3.46244 5.69592   3
  45 -11   0 93.3456 13.8121   6
  45 -11   0 98.7955 18.9566   2
 -45 -11   0 81.1707 16.3764   2
 -45 -11   0 107.649 12.4021   8
 -45  11   0 84.7791 10.2140   8
  45  11   0 93.0267 10.8202   6
  45  11   0 78.3480 10.7206   3
 -45  11   0 86.7961 10.5108   4
   0  12   0 5.39630 1.61236   8
   0  12   0 3.50089 1.84015   6
   0  12   0 5.11758 1.60225   5
   0  12   0 4.74951 1.62590   7
   0  12   0 2.12317 1.70440   4
   0  12   0 5.03460 1.56315   3
   2  12   0 66.5463 4.62791   5
   2  12   0 57.8282 4.13300   3
  -2  12   0 69.5744 4.34701   7
  -2  12   0 68.3131 3.84066   5
   2  12   0 61.2706 4.48448   6
   2  12   0 70.5858 4.48044   4
  -2  12   0 70.1036 4.55879   6
   2  12   0 56.1543 4.14105   7
   2  12   0 63.3262 4.07658   8
  -2  12   0 67.6129 4.06383   3
  -2  12   0 68.2802 3.96615   8
  -2  12   0 60.6509 4.31077   4
  -4  12   0 0.55932 1.51183   8
   4  12   0 3.58462 1.70274   8
   4  12   0 2.99148 1.53193   7
   4  12   0 0.85196 1.75089   4
   4  12   0 1.09788 1.88202   5
  -4  12   0 1.15526 1.39077   3
   4  12   0 1.96294 1.56426   3
  -4  12   0 1.96553 1.65874   4
  -4  12   0 1.58529 1.68877   7
  -4  12   0 2.05428 1.90119   6
   4  12   0 3.57532 1.90246   6
  -4  12   0 1.32425 1.14216   5
   6 -12   0 0.35802 1.84981   6
  -6 -12   0 3.82440 1.72318   8
   6  12   0 3.14170 1.84893   8
   6  12   0 1.31776 1.58781   3
   6  12   0 -0.2054 1.99817   5
  -6  12   0 -1.0232 1.60063   8
  -6  12   0 -0.5348 1.58197   4
  -6  12   0 2.19939 1.35676   3
  -6  12   0 1.81830 0.91083   5
   6  12   0 1.77231 1.92191   6
   6  12   0 1.07972 1.45607   7
  -6  12   0 1.83755 1.94736   6
  -8 -12   0 195.884 9.21235   8
   8 -12   0 178.719 9.94785   6
   8  12   0 186.755 9.27108   3
   8  12   0 197.219 9.53300   5
   8  12   0 187.428 9.20047   8
   8  12   0 193.320 9.24966   6
   8  12   0 199.164 8.95596   7
  -8  12   0 188.805 8.80456   3
  -8  12   0 173.870 9.34667   6
  -8  12   0 194.243 9.04952   4
 -10 -12   0 7.25820 1.99507   8
  10 -12   0 5.07390 2.11763   6
  10  12   0 3.17756 2.11480   6
  10  12   0 6.66629 1.57032   7
 -10  12   0 7.27041 1.40552   3
  10  12   0 9.42451 2.58724   5
  10  12   0 8.73967 1.99936   3
 -10  12   0 3.22876 2.19734   6
  10  12   0 7.46533 2.14326   8
 -10  12   0 8.86487 1.80144   4
  12 -12   0 95.6333 5.09564   2
 -12 -12   0 91.9749 4.99761   2
  12 -12   0 90.8590 5.87504   6
  12 -12   0 81.6511 5.14165   2
 -12 -12   0 89.5524 5.47626   8
 -12 -12   0 82.7834 5.37509   2
  12  12   0 87.2419 7.89151   2
 -12  12   0 84.4000 4.75422   3
  12  12   0 86.6510 5.53614   3
 -12  12   0 89.2143 5.12082   4
 -12  12   0 93.7616 5.97399   6
  12  12   0 90.3855 5.67056   6
 -12  12   0 92.5198 4.58820   3
 -12  12   0 88.8250 5.05471   8
  12  12   0 84.8553 6.36824   5
  12  12   0 89.5436 5.70482   8
  12  12   0 84.0379 4.86370   7
 -14 -12   0 184.656 9.25380   2
 -14 -12   0 192.225 9.49629   8
 -14 -12   0 186.974 9.71767   2
  14 -12   0 183.716 9.40050   2
  14 -12   0 191.653 9.49586   2
  14 -12   0 189.528 9.81869   6
 -14  12   0 190.754 10.0847   2
  14  12   0 182.199 10.1644   5
 -14  12   0 190.886 8.61824   3
  14  12   0 189.882 9.56335   3
  14  12   0 199.750 8.94205   7
 -14  12   0 190.559 9.11670   4
  14  12   0 200.107 10.9648   2
  14  12   0 185.284 9.56190   6
 -14  12   0 185.965 9.80904   6
 -14  12   0 196.131 9.12386   8
 -14  12   0 192.024 8.67942   3
  14  12   0 189.903 10.1285   8
  16 -12   0 103.883 6.73569   6
 -16 -12   0 102.602 6.15714   2
  16 -12   0 88.7679 6.51777   2
 -16 -12   0 108.902 7.10574   2
  16 -12   0 91.3718 6.64056   2
 -16 -12   0 109.048 6.24320   8
 -16  12   0 107.026 5.76854   4
 -16  12   0 102.616 7.62910   2
 -16  12   0 100.681 4.90783   3
  16  12   0 106.404 6.80316   8
  16  12   0 107.463 7.54457   5
 -16  12   0 101.358 6.89413   6
 -16  12   0 102.781 4.91760   3
  16  12   0 102.889 6.57043   6
 -16  12   0 99.9347 5.87515   8
  16  12   0 102.814 5.53369   7
 -16  12   0 105.187 5.36349   8
  16  12   0 90.4000 8.96265   2
  16  12   0 105.706 6.79567   4
  16  12   0 110.504 6.28606   3
  18 -12   0 12.3572 3.14697   4
  18 -12   0 9.75896 3.11428   2
  18 -12   0 7.07664 2.83288   2
 -18 -12   0 9.87373 3.60885   2
 -18 -12   0 12.6561 2.64675   7
 -18 -12   0 9.96344 2.56128   2
 -18 -12   0 22.4117 3.84513   8
  18 -12   0 8.21701 2.77507   6
 -18  12   0 10.6023 1.81719   8
 -18  12   0 13.0452 3.25042   4
  18  12   0 8.16763 1.67909   6
  18  12   0 6.03023 3.59878   9
  18  12   0 7.63288 3.07740   8
  18  12   0 14.0513 2.95789   7
 -18  12   0 7.74273 3.03811   6
  18  12   0 10.1686 4.94311   2
  18  12   0 8.33301 2.97360   4
 -18  12   0 11.9052 4.00245   2
  18  12   0 6.85791 3.58407   5
  20 -12   0 84.0828 7.51468   2
 -20 -12   0 93.5511 6.59680   2
 -20 -12   0 99.1217 6.27667   8
 -20 -12   0 96.0745 6.45159   7
  20 -12   0 99.3136 7.08378   2
  20 -12   0 90.3630 7.06614   4
 -20 -12   0 95.3725 8.27577   2
  20 -12   0 107.254 6.97330   6
 -20  12   0 84.7270 8.78855   2
  20  12   0 85.4565 5.34884   7
 -20  12   0 99.0841 5.61973   4
  20  12   0 95.6691 10.5336   2
  20  12   0 95.5505 6.27199   3
  20  12   0 94.6802 5.32413   6
 -20  12   0 97.1654 5.27372   8
  20  12   0 85.4789 6.57257   9
  22 -12   0 13.6962 3.60725   2
  22 -12   0 12.4256 4.38520   4
  22 -12   0 14.5117 2.47143   5
 -22 -12   0 7.48295 2.97490   2
 -22 -12   0 16.0756 4.34788   8
  22 -12   0 21.9823 6.56147   2
 -22 -12   0 10.1339 3.13666   7
  22 -12   0 15.0188 3.28874   6
 -22 -12   0 14.3172 4.49247   2
 -22  12   0 10.2057 2.09687   8
  22  12   0 12.0225 3.11069   6
  22  12   0 9.31411 3.21507   9
  22  12   0 16.0162 3.30391   7
 -22  12   0 11.3566 6.68291   2
  22  12   0 12.1011 6.34327   2
  22  12   0 10.1150 2.52784   3
 -22  12   0 10.0600 2.25042   4
 -24 -12   0 9.14323 3.46304   7
  24 -12   0 5.42278 3.72325   2
  24 -12   0 1.84350 4.26060   2
 -24 -12   0 13.9410 5.16100   2
  24 -12   0 11.2104 3.40443   6
 -24 -12   0 12.9461 3.10804   8
  24 -12   0 11.7758 3.95346   4
 -24 -12   0 19.5370 5.39722   2
  24 -12   0 7.86498 1.80622   5
 -24  12   0 11.0872 2.37985   4
  24  12   0 9.73304 7.06041   2
 -24  12   0 6.01291 5.41184   2
 -24  12   0 13.5249 3.36536   8
  24  12   0 8.67234 3.58877   9
  24  12   0 11.5131 2.23050   7
  24  12   0 10.6130 2.77819   3
  24  12   0 9.18732 2.11824   6
 -26 -12   0 9.25441 3.85042   7
  26 -12   0 2.18694 4.86289   2
 -26 -12   0 5.88359 3.10028   8
  26 -12   0 5.27174 2.04322   5
 -26 -12   0 5.45560 5.72522   2
  26 -12   0 4.91667 4.48238   4
 -26 -12   0 7.27166 3.50174   2
  26 -12   0 2.99256 3.44330   6
  26 -12   0 6.25167 4.00414   2
  26  12   0 2.44657 4.03038   9
  26  12   0 5.90460 2.23176   6
 -26  12   0 3.83770 2.39323   4
  26  12   0 -1.7259 7.79810   2
  26  12   0 2.68705 2.26509   7
 -26  12   0 5.11061 2.31100   8
  26  12   0 8.89471 3.09049   3
 -26  12   0 -0.6963 5.97483   2
 -28 -12   0 3.81639 3.30585   8
  28 -12   0 8.94044 3.81688   6
  28 -12   0 6.88502 5.64430   2
  28 -12   0 9.78352 4.74967   2
 -28 -12   0 12.1903 5.23474   7
 -28 -12   0 3.06585 6.27986   2
  28 -12   0 12.5676 2.44859   5
 -28 -12   0 7.64291 3.98918   2
  28  12   0 11.9480 2.65301   7
  28  12   0 7.74606 2.95460   3
  28  12   0 6.46537 4.58170   9
 -28  12   0 13.7442 2.77583   4
 -28  12   0 14.5742 6.84821   2
 -28  12   0 16.6519 4.04116   8
  28  12   0 12.8097 2.62872   6
  28  12   0 9.41541 8.48759   2
 -30 -12   0 52.5635 9.04564   7
 -30 -12   0 53.2859 12.7644   2
 -30 -12   0 42.7233 6.44971   8
  30 -12   0 36.0737 11.0946   2
 -30 -12   0 61.4953 8.12474   2
  30 -12   0 32.9727 7.44609   6
  30 -12   0 47.2711 4.91895   5
  30 -12   0 36.2813 8.66209   2
  30  12   0 39.3505 5.26680   7
  30  12   0 28.8284 10.0467   2
 -30  12   0 37.2098 8.21662   2
  30  12   0 39.4208 9.70469   9
 -30  12   0 42.8959 5.00028   8
 -30  12   0 41.4601 5.32155   4
 -30  12   0 40.8776 6.44863   9
  30  12   0 52.6875 5.18320   6
  30  12   0 49.2713 6.15935   3
 -32 -12   0 74.6580 9.23591   2
 -32 -12   0 63.2129 7.53913   8
 -32 -12   0 75.1210 10.7764   7
  32 -12   0 77.9694 10.2108   2
  32 -12   0 62.3993 6.00423   5
  32 -12   0 66.8664 8.59694   6
 -32  12   0 72.8952 6.04069   8
  32  12   0 65.9893 6.95511   3
  32  12   0 81.3527 6.29191   6
 -32  12   0 71.0019 10.0948   9
  32  12   0 76.8559 11.2609   9
  32  12   0 72.0717 6.31343   7
 -32  12   0 69.9569 6.43419   4
  34 -12   0 128.345 10.5552   6
  34 -12   0 108.305 12.1505   2
 -34 -12   0 131.883 11.2628   2
 -34 -12   0 116.975 9.46252   8
  34  12   0 114.080 8.77213   3
  34  12   0 108.280 13.4843   9
 -34  12   0 114.013 11.8935   9
  34  12   0 111.957 8.16084   7
  34  12   0 118.798 8.02627   6
 -34  12   0 124.161 7.80170   8
 -34  12   0 127.701 8.31629   4
  36 -12   0 -2.4055 4.98841   6
  36 -12   0 0.43151 3.77259   5
  36 -12   0 2.64428 9.53188   2
  36 -12   0 6.41079 4.84214   5
 -36 -12   0 5.17683 5.75939   2
 -36 -12   0 0.97156 4.66281   8
  36 -12   0 -4.4993 6.21081   2
 -36  12   0 4.55665 3.62082   4
  36  12   0 0.78534 3.58594   6
 -36  12   0 4.69191 6.61077   9
  36  12   0 -0.0209 7.44062   9
 -36  12   0 1.37237 3.57825   8
  36  12   0 -0.2974 4.02016   3
 -38 -12   0 100.976 9.91339   8
 -38 -12   0 93.9763 12.3535   2
  38 -12   0 101.194 13.8795   2
  38 -12   0 88.6584 11.1780   6
  38  12   0 102.870 8.42216   6
 -38  12   0 84.6075 7.92257   8
  38  12   0 85.3004 9.00125   3
 -38  12   0 94.7763 8.53460   4
  40 -12   0 2.22529 6.15718   6
 -40 -12   0 4.69497 5.69659   8
  40 -12   0 -5.5687 7.55553   2
  40 -12   0 1.79687 4.93594   5
 -40 -12   0 -4.2738 6.91875   2
 -40  12   0 3.46878 4.46543   8
 -40  12   0 0.42534 4.37266   4
  40  12   0 2.15615 4.76518   3
  40  12   0 -2.3945 5.12598   6
  42 -12   0 10.3986 7.18425   6
  42 -12   0 16.0310 9.16433   2
 -42 -12   0 7.07531 7.38532   8
 -42 -12   0 6.96821 8.23142   2
  42 -12   0 5.21224 5.61545   5
  42  12   0 5.36124 5.14443   6
  42  12   0 12.7349 5.45786   3
 -42  12   0 6.12082 5.04526   8
 -42  12   0 33.6606 8.91572   4
 -44 -12   0 11.9997 7.07237   8
  44 -12   0 1.27514 7.55002   6
 -44 -12   0 -1.6006 10.6300   2
  44 -12   0 7.55446 9.83390   2
  44 -12   0 1.68381 6.39482   5
 -44  12   0 -0.2470 5.62815   4
  44  12   0 3.97937 5.82047   6
  44  12   0 9.64853 5.78342   3
 -44  12   0 1.60101 5.54269   8
  -1  13   0 44.9148 3.75169   3
  -1  13   0 36.7605 3.49095   5
   1  13   0 49.1485 4.10391   4
   1  13   0 45.7605 5.51910   5
  -1  13   0 48.8220 3.95609   7
  -1  13   0 39.6030 3.54177   8
  -1  13   0 38.9837 3.93423   4
  -1  13   0 44.5195 4.28936   6
   1  13   0 42.8090 4.26281   6
   1  13   0 38.5523 3.69867   3
   1  13   0 42.4169 3.61197   8
   1  13   0 41.7237 3.81250   7
   3  13   0 170.845 8.11212   8
  -3  13   0 164.354 7.92735   8
   3  13   0 157.041 8.35742   6
  -3  13   0 163.293 8.03692   3
   3  13   0 159.163 8.28841   5
  -3  13   0 150.478 7.62883   5
   3  13   0 166.597 8.13839   7
   3  13   0 181.959 8.29359   3
  -3  13   0 163.185 8.43662   6
  -3  13   0 156.514 8.27376   7
  -3  13   0 171.689 8.29864   4
   5  13   0 257.843 12.0164   5
  -5  13   0 265.479 12.0744   6
   5  13   0 234.654 11.7929   8
   5  13   0 260.628 11.9416   6
  -5  13   0 247.802 11.8466   4
   5  13   0 264.878 11.7818   7
  -5  13   0 250.478 12.0218   7
  -5  13   0 236.987 11.6369   3
   5  13   0 263.615 11.9883   3
   5  13   0 257.087 12.1502   4
  -5  13   0 254.417 11.6096   8
  -5  13   0 249.257 11.2010   5
   7 -13   0 228.904 11.8046   6
  -7 -13   0 249.371 11.6525   8
   7  13   0 247.585 11.3960   7
  -7  13   0 245.975 11.2925   3
  -7  13   0 242.272 11.5192   4
   7  13   0 242.603 11.7015   3
   7  13   0 244.796 11.6776   6
  -7  13   0 249.347 11.2832   8
   7  13   0 244.431 11.8593   5
  -7  13   0 250.876 11.8142   6
   7  13   0 254.491 11.6378   8
  -9 -13   0 1167.92 49.1851   8
   9 -13   0 1157.18 49.3126   6
   9  13   0 1153.10 49.2447   3
   9  13   0 1085.00 48.8566   7
  -9  13   0 1099.24 48.8105   8
   9  13   0 1159.13 49.0251   6
  -9  13   0 1117.95 48.8007   3
  -9  13   0 1150.40 48.9788   4
   9  13   0 1075.56 49.0401   8
  -9  13   0 1127.35 49.1217   6
   9  13   0 1115.96 49.1929   5
  11 -13   0 30.5510 4.43340   6
 -11 -13   0 24.6480 3.82246   8
 -11  13   0 20.6202 2.76547   3
 -11  13   0 21.3459 3.44632   4
  11  13   0 25.5014 5.24858   5
  11  13   0 26.2746 3.12392   7
  11  13   0 21.0172 4.37739   6
 -11  13   0 23.7410 3.45269   3
 -11  13   0 24.9112 3.24601   8
  11  13   0 17.8569 3.85678   3
 -11  13   0 23.4766 4.76991   6
  11  13   0 26.2317 4.26020   8
 -13 -13   0 327.712 14.8131   2
  13 -13   0 336.262 15.6327   6
 -13 -13   0 348.738 15.3708   8
 -13 -13   0 350.399 16.3375   2
  13  13   0 334.497 15.4668   8
 -13  13   0 313.100 14.6441   3
 -13  13   0 306.914 15.5117   6
  13  13   0 335.701 15.3019   6
  13  13   0 338.657 15.4205   3
  13  13   0 305.089 14.7816   7
 -13  13   0 337.424 14.5853   3
 -13  13   0 326.145 14.9706   4
  13  13   0 321.377 15.8537   5
 -13  13   0 323.925 14.8670   8
 -15 -13   0 120.813 6.58701   2
  15 -13   0 117.027 6.75109   2
 -15 -13   0 114.202 7.21533   2
 -15 -13   0 116.971 6.97746   8
  15 -13   0 119.012 7.49937   6
  15 -13   0 119.992 9.19472   2
  15  13   0 119.492 7.50792   8
 -15  13   0 122.081 5.68162   3
 -15  13   0 119.068 6.50896   4
 -15  13   0 116.975 6.45731   8
  15  13   0 128.262 7.10193   3
  15  13   0 108.436 6.16310   7
  15  13   0 104.058 8.37144   5
  15  13   0 114.245 7.31319   6
 -15  13   0 120.149 5.77777   3
 -15  13   0 107.210 7.70522   6
 -17 -13   0 20.6538 5.57589   2
  17 -13   0 18.8136 5.12032   6
  17 -13   0 14.4242 3.17097   2
 -17 -13   0 25.2239 4.35400   8
 -17 -13   0 16.2155 4.04576   2
  17 -13   0 10.2213 2.88470   2
  17  13   0 21.3441 3.37894   6
  17  13   0 22.9672 4.31902   3
  17  13   0 29.0040 5.68655   8
 -17  13   0 20.7427 3.05976   8
 -17  13   0 17.7821 2.05257   3
 -17  13   0 20.6333 3.60730   4
  17  13   0 17.7434 4.16157   5
  17  13   0 23.2489 3.24304   7
 -17  13   0 19.4222 2.03876   3
 -17  13   0 15.1290 3.86448   8
  19 -13   0 4.96002 3.12266   6
 -19 -13   0 6.75121 2.76847   2
 -19 -13   0 5.65678 3.86771   2
  19 -13   0 7.53408 3.27478   2
 -19 -13   0 11.5627 2.84381   8
  19 -13   0 11.7117 3.48670   2
 -19  13   0 8.50302 2.21309   4
  19  13   0 6.49844 3.29497   6
 -19  13   0 9.06789 1.94614   8
  19  13   0 5.41344 2.51444   3
  19  13   0 7.98477 2.01029   7
 -19  13   0 8.22191 2.69550   8
  19  13   0 1.96926 6.09155   2
  19  13   0 7.71052 1.92142   6
  21 -13   0 15.7572 4.04893   2
 -21 -13   0 23.2166 5.02357   2
  21 -13   0 26.8406 5.83917   6
 -21 -13   0 26.5284 5.42968   7
 -21 -13   0 16.2299 4.59223   2
  21 -13   0 25.3391 5.90128   2
  21 -13   0 19.6733 4.98358   4
 -21 -13   0 24.0950 4.91941   8
  21  13   0 30.1740 4.93627   3
  21  13   0 21.9050 3.47723   6
  21  13   0 22.9989 3.61485   7
  21  13   0 9.79126 6.85362   2
 -21  13   0 19.7051 4.00259   4
 -21  13   0 19.4582 3.42290   8
  23 -13   0 25.6052 7.25196   2
  23 -13   0 20.8695 6.33879   2
  23 -13   0 19.5693 3.87476   6
 -23 -13   0 23.5933 5.13618   8
 -23 -13   0 22.5272 5.55060   2
 -23 -13   0 24.7170 6.15990   7
 -23 -13   0 16.9584 5.29268   2
  23 -13   0 20.8880 4.59479   4
 -23  13   0 19.9135 6.10605   2
  23  13   0 17.0156 3.66871   6
 -23  13   0 18.7723 3.60134   8
  23  13   0 13.0647 7.56205   2
 -23  13   0 16.7988 4.14452   4
  23  13   0 20.8718 3.92995   7
 -25 -13   0 2.85296 5.57788   2
 -25 -13   0 3.82290 3.96322   7
 -25 -13   0 1.84427 3.57585   2
  25 -13   0 3.13866 3.70595   6
  25 -13   0 -1.8871 4.84546   2
  25 -13   0 0.27414 4.75317   4
  25 -13   0 2.00331 4.16877   2
 -25 -13   0 1.16421 3.14306   8
  25  13   0 -4.0896 8.08664   2
  25  13   0 3.55872 2.38853   7
  25  13   0 4.68452 2.29977   6
 -25  13   0 1.78051 2.47046   4
  25  13   0 -0.4535 2.89477   3
 -25  13   0 -3.3642 6.31025   2
  27 -13   0 105.568 9.45943   2
  27 -13   0 110.874 5.95691   5
 -27 -13   0 105.190 12.5006   2
  27 -13   0 103.874 11.2014   2
 -27 -13   0 113.344 8.89491   2
 -27 -13   0 81.9324 11.6453   7
  27 -13   0 119.208 13.4026   6
 -27 -13   0 120.872 8.24296   8
 -27  13   0 116.365 6.73210   8
 -27  13   0 121.218 7.24419   4
  27  13   0 97.7022 17.3216   2
  27  13   0 107.056 6.96319   7
  27  13   0 117.227 6.81852   6
 -27  13   0 105.317 13.9888   2
  27  13   0 123.054 8.03665   3
 -29 -13   0 86.9710 9.96368   7
  29 -13   0 99.5467 9.85546   2
 -29 -13   0 82.9995 13.7029   2
 -29 -13   0 109.676 8.35076   8
  29 -13   0 91.4410 12.0577   2
 -29 -13   0 94.9193 9.09597   2
  29 -13   0 99.0155 6.02363   5
  29 -13   0 116.619 9.45472   6
 -29  13   0 108.329 6.73301   8
  29  13   0 105.283 7.91384   3
  29  13   0 94.3130 6.79061   6
 -29  13   0 108.330 7.13091   4
  29  13   0 88.5508 6.85089   7
  31 -13   0 -0.2365 7.04314   2
  31 -13   0 2.40065 5.21179   2
 -31 -13   0 0.78467 4.62544   2
 -31 -13   0 -2.6493 8.09320   2
 -31 -13   0 -3.9072 5.71122   7
  31 -13   0 4.22198 4.72414   6
  31 -13   0 0.42138 2.69480   5
 -31 -13   0 0.73233 4.12973   8
  31  13   0 -1.1446 2.95245   6
  31  13   0 1.64435 3.46166   3
 -31  13   0 0.75879 3.08449   4
 -31  13   0 -0.7192 2.94880   8
  31  13   0 1.97643 3.13927   7
  33 -13   0 137.443 8.65812   5
  33 -13   0 125.303 11.6153   6
 -33 -13   0 137.312 10.5012   8
  33 -13   0 134.418 12.5157   2
 -33 -13   0 141.216 11.6842   2
  33  13   0 152.201 9.97857   3
 -33  13   0 151.387 8.69937   8
  33  13   0 143.655 9.07426   7
  33  13   0 141.599 8.90937   6
 -33  13   0 149.170 9.12672   4
  35 -13   0 20.1120 6.71160   2
 -35 -13   0 3.92540 10.7986   2
  35 -13   0 0.48003 9.22350   2
  35 -13   0 22.5435 5.92105   6
 -35 -13   0 19.1948 6.35759   2
 -35 -13   0 12.2582 5.12390   8
  35  13   0 25.3255 6.56566   6
 -35  13   0 22.0437 4.08842   4
 -35  13   0 23.5045 6.16526   8
  35  13   0 19.6141 4.58384   3
  35  13   0 16.6442 4.13456   7
 -37 -13   0 13.2969 6.61626   2
  37 -13   0 17.1006 7.49517   2
  37 -13   0 25.4860 6.39309   6
 -37 -13   0 8.90177 5.56486   8
  37  13   0 17.9884 4.92281   3
 -37  13   0 16.2793 4.17991   8
 -37  13   0 21.1134 4.44983   4
  37  13   0 29.0493 7.27323   6
  39 -13   0 0.84124 4.91415   5
  39 -13   0 0.16364 6.58463   6
  39 -13   0 2.29962 8.01223   2
 -39 -13   0 -1.2674 7.11336   2
 -39 -13   0 11.3665 6.07392   8
 -39  13   0 0.23757 4.57944   8
 -39  13   0 3.98736 4.59331   4
  39  13   0 -0.2737 4.67582   6
  39  13   0 8.44843 5.46386   3
  41 -13   0 95.6975 20.1449   2
 -41 -13   0 61.3574 15.9048   2
 -41 -13   0 87.3000 11.8167   8
  41 -13   0 59.9311 13.4342   6
 -41  13   0 63.9388 9.65136   4
 -41  13   0 83.5840 9.22655   8
  41  13   0 69.2142 9.83581   6
  41  13   0 65.5720 10.1883   3
  43 -13   0 14.0229 8.21241   6
 -43 -13   0 7.42878 8.79824   2
 -43 -13   0 3.92396 7.41189   8
  43 -13   0 11.2484 10.1579   2
  43  13   0 9.74486 6.00900   6
 -43  13   0 7.74135 6.01083   8
 -43  13   0 14.4571 5.94649   4
  43  13   0 8.82969 7.31577   3
   0  14   0 353.523 16.1041   6
   0  14   0 341.880 15.8397   5
   0  14   0 341.103 16.1756   7
   0  14   0 355.851 15.9632   3
   0  14   0 357.788 16.1201   4
   0  14   0 345.884 15.7998   8
   2  14   0 41.6341 4.08004   3
   2  14   0 39.8712 4.69850   6
  -2  14   0 50.2249 3.94194   8
  -2  14   0 44.7568 3.93763   3
   2  14   0 42.4330 4.13990   7
   2  14   0 34.7422 4.04265   8
  -2  14   0 35.5838 5.40530   4
  -2  14   0 42.9686 4.34831   7
   2  14   0 44.9481 4.52705   4
  -2  14   0 44.1722 3.52615   5
  -2  14   0 41.9663 4.94338   6
   2  14   0 39.4362 4.32305   5
  -4  14   0 156.067 7.25819   5
  -4  14   0 121.543 9.79725   4
  -4  14   0 169.031 8.34163   7
   4  14   0 166.381 8.41645   5
   4  14   0 153.931 7.98849   7
  -4  14   0 157.492 8.50577   6
   4  14   0 160.344 8.42612   4
   4  14   0 154.862 8.37522   6
   4  14   0 142.563 8.02614   8
   4  14   0 172.164 8.24750   3
  -4  14   0 157.629 7.75952   8
  -6  14   0 2.24140 2.66464   6
   6  14   0 2.66661 2.51897   4
   6  14   0 4.89941 2.41163   8
   6  14   0 4.83903 2.51673   6
   6  14   0 0.57577 2.12370   3
  -6  14   0 4.72847 1.99892   8
   6  14   0 7.82808 2.77868   5
   6  14   0 4.99378 1.94389   7
  -6  14   0 6.02483 2.32228   7
  -6  14   0 6.42018 1.85812   3
  -6  14   0 3.83024 2.34440   4
   8 -14   0 439.175 20.5477   6
  -8 -14   0 448.184 20.3772   8
   8  14   0 469.818 20.0853   7
  -8  14   0 436.818 20.4810   7
  -8  14   0 452.418 19.9710   3
   8  14   0 472.144 20.4729   3
  -8  14   0 434.647 19.9551   8
   8  14   0 444.740 20.5546   5
   8  14   0 456.390 20.3218   6
  -8  14   0 452.629 20.4870   6
   8  14   0 444.141 20.3070   8
  10 -14   0 52.5186 5.37878   6
 -10 -14   0 47.9854 4.81501   8
  10  14   0 46.8113 5.26846   6
 -10  14   0 48.5961 3.81467   3
  10  14   0 54.0937 4.89057   3
  10  14   0 49.8114 5.12950   8
 -10  14   0 53.3568 4.12104   8
  10  14   0 50.1783 6.12715   5
 -10  14   0 49.2728 5.54398   4
 -10  14   0 48.6693 5.82508   6
  10  14   0 58.1103 4.10087   7
 -12 -14   0 0.92211 2.43841   8
  12 -14   0 -0.2825 2.73099   6
  12  14   0 1.84883 1.80895   7
 -12  14   0 0.18177 3.11932   6
  12  14   0 0.32908 3.52552   5
  12  14   0 0.48255 2.80533   6
 -12  14   0 4.90503 1.67200   3
 -12  14   0 4.21515 2.11083   3
  12  14   0 2.35741 2.91744   8
  12  14   0 4.20783 2.40496   3
 -12  14   0 3.86646 2.14327   8
 -12  14   0 2.44367 2.11022   4
  14 -14   0 2.73212 3.05232   6
 -14 -14   0 0.77487 2.55441   8
  14  14   0 1.77601 1.87226   7
  14  14   0 -0.0124 2.44156   3
 -14  14   0 2.98155 2.10591   4
  14  14   0 3.96661 3.24041   8
 -14  14   0 2.68504 3.36522   6
 -14  14   0 0.11244 2.23095   8
 -14  14   0 2.23814 1.53092   3
  14  14   0 3.79262 3.01003   6
 -14  14   0 0.60128 1.81048   3
  14  14   0 2.44399 3.87744   5
  16 -14   0 120.705 8.04493   6
 -16 -14   0 119.174 6.68781   2
  16 -14   0 115.360 6.66729   2
 -16 -14   0 122.056 7.26361   2
 -16 -14   0 114.851 7.36580   8
 -16  14   0 118.144 6.72505   8
  16  14   0 111.428 7.36025   3
  16  14   0 118.183 7.85497   6
 -16  14   0 115.846 5.66302   3
  16  14   0 111.631 6.42617   7
  16  14   0 118.845 9.52107   5
 -16  14   0 113.286 5.78003   3
 -16  14   0 121.939 6.68131   4
 -16  14   0 112.119 6.14010   8
 -18 -14   0 57.4488 5.85917   8
  18 -14   0 71.0965 6.79932   6
  18 -14   0 58.9809 5.89256   2
 -18 -14   0 57.3329 6.63330   2
  18 -14   0 72.5298 6.16310   2
 -18 -14   0 65.9619 5.46365   2
  18  14   0 59.4098 6.75485   6
 -18  14   0 61.4161 5.34009   8
  18  14   0 59.5262 5.89326   3
 -18  14   0 71.1231 5.14763   4
  18  14   0 61.8366 4.75097   7
  18  14   0 65.4458 4.57931   6
 -18  14   0 63.4855 4.41303   8
  20 -14   0 -0.4596 3.26332   2
 -20 -14   0 1.02244 2.87431   2
  20 -14   0 5.95879 3.62623   6
  20 -14   0 1.32428 3.60292   2
 -20 -14   0 5.94657 3.13703   8
  20  14   0 5.26323 2.18506   6
  20  14   0 5.69258 3.91311   6
  20  14   0 4.31102 2.72524   7
 -20  14   0 4.22656 2.42975   4
  20  14   0 0.26446 4.32781   3
 -20  14   0 1.94150 2.09339   8
 -20  14   0 6.60126 2.95049   8
  22 -14   0 1.26025 3.68222   6
 -22 -14   0 -0.1101 3.19818   8
  22 -14   0 -1.9459 3.76371   2
 -22 -14   0 -1.0546 3.15892   2
 -22 -14   0 2.23783 4.65827   2
  22 -14   0 -1.4257 4.10791   2
 -22  14   0 -0.6746 2.19689   8
  22  14   0 0.65560 2.95213   3
  22  14   0 0.67073 2.29782   7
  22  14   0 -4.7765 4.14502   6
 -22  14   0 0.63177 3.16751   8
 -22  14   0 1.31590 2.52556   4
  22  14   0 0.42911 2.53161   6
 -24 -14   0 14.4356 3.72597   8
  24 -14   0 12.9220 9.35543   2
  24 -14   0 9.33193 4.19026   6
  24 -14   0 5.46914 4.30113   2
 -24 -14   0 11.1670 3.70959   2
 -24 -14   0 10.1307 5.42317   2
 -24 -14   0 9.22897 4.22147   7
  24 -14   0 7.72735 5.27487   4
  24  14   0 5.89001 2.55925   7
 -24  14   0 9.52159 2.80265   4
  24  14   0 6.76986 3.39006   3
  24  14   0 5.80336 2.49973   6
 -24  14   0 6.35120 2.41708   8
  26 -14   0 16.9246 4.72051   6
 -26 -14   0 14.5323 4.18003   2
  26 -14   0 8.14248 5.68192   2
  26 -14   0 12.1531 4.81406   2
 -26 -14   0 3.52808 6.34183   8
 -26 -14   0 10.9242 6.47945   2
 -26 -14   0 6.39711 4.86769   7
  26  14   0 24.7424 4.61443   6
  26  14   0 7.80435 3.43868   3
 -26  14   0 16.2614 4.51749   8
 -26  14   0 7.98016 3.03711   4
  26  14   0 18.1279 4.81210   7
 -28 -14   0 68.8974 8.24065   2
 -28 -14   0 46.3073 9.64628   7
  28 -14   0 64.8152 9.44716   2
  28 -14   0 49.3399 10.9925   2
  28 -14   0 68.2176 9.16414   6
 -28 -14   0 80.4286 7.89611   8
 -28 -14   0 62.5317 12.8021   2
 -28  14   0 78.0960 6.56395   4
  28  14   0 66.6212 6.03650   6
  28  14   0 73.1094 7.48344   3
 -28  14   0 71.5451 5.82956   8
  28  14   0 74.1322 6.26992   7
 -30 -14   0 26.6705 8.11350   2
 -30 -14   0 41.7647 7.58655   8
 -30 -14   0 37.3886 6.50942   7
  30 -14   0 14.1514 7.16099   2
  30 -14   0 32.6178 9.50332   2
  30 -14   0 30.0464 5.70730   6
  30  14   0 31.5178 5.95822   7
 -30  14   0 25.2841 5.38786   8
  30  14   0 33.8648 7.16197   3
  30  14   0 42.2940 5.77220   6
 -30  14   0 38.4073 6.12422   4
  32 -14   0 8.35615 5.51904   6
 -32 -14   0 3.59773 5.13507   2
 -32 -14   0 2.31455 4.71916   8
 -32 -14   0 4.64718 9.09806   2
  32 -14   0 3.88716 5.92385   2
  32 -14   0 3.90917 7.77628   2
 -32  14   0 4.45346 3.46884   8
  32  14   0 8.30936 3.68126   7
  32  14   0 1.64037 4.23189   3
 -32  14   0 3.69828 3.61432   4
  32  14   0 6.51666 3.54973   6
  34 -14   0 44.7728 7.12890   6
 -34 -14   0 50.9816 9.03161   8
  34 -14   0 64.8455 11.6607   2
 -34 -14   0 64.4107 10.2586   2
 -34  14   0 41.8231 7.59413   4
 -34  14   0 58.9144 6.82117   8
  34  14   0 54.5936 7.52637   7
  34  14   0 58.8607 7.22746   6
  34  14   0 53.9547 8.38047   3
  36 -14   0 85.4629 13.4352   2
 -36 -14   0 73.7487 10.4869   8
 -36 -14   0 89.8345 11.8435   2
  36 -14   0 99.4986 12.7241   6
 -36  14   0 87.2116 8.23797   8
 -36  14   0 95.1173 8.83841   4
  36  14   0 106.602 11.4488   3
  36  14   0 94.0745 8.65337   6
 -38 -14   0 -1.0879 6.82081   2
  38 -14   0 -0.4209 7.77262   2
  38 -14   0 -1.7668 7.07607   6
 -38 -14   0 -0.4215 6.08729   8
  38  14   0 -5.0924 5.06527   3
  38  14   0 3.38349 4.93716   6
 -38  14   0 -3.1276 4.67132   8
 -38  14   0 -0.1399 4.71094   4
  40 -14   0 -4.0356 7.69602   6
  40 -14   0 1.07068 8.70865   2
 -40 -14   0 -0.6913 6.69775   8
 -40 -14   0 6.94570 8.03051   2
 -40  14   0 2.14144 5.44206   4
 -40  14   0 7.04083 5.26823   8
  40  14   0 1.22079 5.68913   3
  -1  15   0 10.2335 2.70684   4
  -1  15   0 18.0524 3.77407   8
   1  15   0 15.7037 4.09665   7
  -1  15   0 10.8644 3.04734   6
   1  15   0 12.1335 2.57507   5
  -1  15   0 12.5727 2.60781   7
   1  15   0 15.6286 2.85343   4
  -1  15   0 20.5957 3.51054   5
  -1  15   0 21.7952 3.87831   3
   1  15   0 17.7603 3.96042   8
   1  15   0 18.3848 3.96514   3
   1  15   0 8.61179 3.03530   6
   3  15   0 92.9020 6.74751   6
  -3  15   0 105.600 6.52126   7
  -3  15   0 100.728 6.42488   4
  -3  15   0 104.594 5.22231   5
   3  15   0 100.375 6.35476   3
  -3  15   0 100.434 6.04007   3
   3  15   0 105.475 6.66988   4
   3  15   0 92.8833 6.22116   8
  -3  15   0 101.924 5.88500   8
   3  15   0 98.5316 6.54135   5
  -3  15   0 87.9171 6.93695   6
   5  15   0 -1.1164 2.10816   7
   5  15   0 2.12340 3.07741   5
  -5  15   0 3.61550 2.24463   8
  -5  15   0 2.94298 3.05031   6
  -5  15   0 1.11745 2.51445   7
   5  15   0 2.10416 2.81484   6
   5  15   0 -3.5604 2.58525   4
  -5  15   0 1.77367 2.05805   3
   5  15   0 0.50452 2.30848   3
  -5  15   0 2.66266 2.31911   4
   5  15   0 0.15255 2.57178   8
  -7  15   0 54.8801 4.81451   4
  -7  15   0 54.0205 4.35192   8
  -7  15   0 48.9560 4.26464   3
   7  15   0 49.3854 5.29418   8
   7  15   0 57.3584 5.66482   6
   7  15   0 53.1261 5.09895   3
   7  15   0 45.7053 5.59232   4
   7  15   0 52.2606 4.54075   7
   7  15   0 54.1433 6.26988   5
  -7  15   0 50.4229 5.33108   7
  -9 -15   0 0.23227 2.59946   8
  -9  15   0 0.59288 1.90839   3
  -9  15   0 1.56234 2.64334   7
   9  15   0 2.38548 2.52889   3
  -9  15   0 -0.2483 2.20003   8
  -9  15   0 1.00439 2.29851   4
   9  15   0 6.53482 5.85691   8
   9  15   0 1.88920 2.08115   7
  -9  15   0 1.80671 3.37795   6
   9  15   0 0.04777 3.48375   5
   9  15   0 -0.5971 2.91506   6
 -11 -15   0 4.06807 2.80025   8
  11 -15   0 1.98250 3.12005   6
  11  15   0 -1.2871 2.58167   3
  11  15   0 0.66576 4.00496   5
  11  15   0 3.85766 3.13582   6
 -11  15   0 2.74823 2.33180   4
 -11  15   0 2.94849 3.51444   6
 -11  15   0 3.41256 2.29639   8
  11  15   0 1.58611 3.24529   8
  11  15   0 2.89962 2.10063   7
 -11  15   0 3.02248 2.60561   3
 -11  15   0 4.74723 1.94048   3
  13 -15   0 20.2038 3.70905   6
 -13 -15   0 23.9975 4.95534   8
 -13  15   0 24.5555 4.07418   3
  13  15   0 20.8588 5.74188   6
  13  15   0 23.5506 4.99581   3
 -13  15   0 24.8981 3.25712   3
  13  15   0 19.3230 3.83280   7
  13  15   0 20.9217 3.97150   8
 -13  15   0 22.4707 4.26900   4
  13  15   0 17.6923 4.51748   5
 -13  15   0 22.9680 3.88346   8
  15 -15   0 0.14020 3.35272   6
 -15 -15   0 -2.3775 2.91470   8
 -15  15   0 4.35827 2.50475   4
 -15  15   0 2.23479 1.63978   3
  15  15   0 2.45067 3.44048   6
  15  15   0 2.89512 4.66943   5
 -15  15   0 0.22991 1.94491   3
  15  15   0 -0.8751 2.73646   3
 -15  15   0 3.65574 2.47565   8
  15  15   0 2.44235 2.14663   7
 -17 -15   0 166.574 9.84332   8
 -17 -15   0 186.243 8.81489   2
  17 -15   0 159.791 10.4728   6
  17  15   0 159.916 10.1603   6
  17  15   0 177.413 8.73741   7
 -17  15   0 173.229 8.47426   8
  17  15   0 165.371 8.61856   6
 -17  15   0 165.564 7.86018   3
  17  15   0 171.370 10.8963   3
 -17  15   0 194.254 9.09721   4
 -17  15   0 172.163 7.92978   3
 -17  15   0 169.006 8.92403   8
  19 -15   0 72.7785 6.54000   2
 -19 -15   0 72.0132 6.03995   2
  19 -15   0 74.8332 7.99660   6
 -19 -15   0 75.0878 7.06165   2
 -19 -15   0 82.3499 7.01239   8
  19 -15   0 77.5604 6.17871   2
 -19  15   0 71.9252 6.02357   8
 -19  15   0 68.1883 5.07037   8
  19  15   0 75.3856 5.30664   6
  19  15   0 72.9178 7.90351   6
 -19  15   0 89.0077 5.92769   4
  19  15   0 89.0591 7.01811   3
  21 -15   0 15.7718 4.13171   2
 -21 -15   0 9.19366 3.52752   2
  21 -15   0 11.7599 4.30232   6
  21 -15   0 24.3954 6.73950   2
 -21 -15   0 13.3433 4.00158   8
 -21 -15   0 16.1878 4.61795   2
 -21  15   0 13.3297 3.00215   4
 -21  15   0 16.3941 3.89532   8
 -21  15   0 19.8548 5.42852   8
  21  15   0 8.90465 3.48129   3
  21  15   0 18.4758 4.39006   7
  21  15   0 18.7942 4.58531   6
  23 -15   0 204.390 11.4929   2
 -23 -15   0 163.641 12.6766   2
 -23 -15   0 203.595 11.1375   2
 -23 -15   0 197.188 11.4115   8
  23 -15   0 213.367 12.3921   6
  23 -15   0 207.135 12.0864   2
 -23  15   0 208.690 10.3297   4
  23  15   0 191.766 11.2444   3
 -23  15   0 185.939 10.5847   8
  23  15   0 173.946 12.3268   6
  23  15   0 191.467 10.0483   7
 -23  15   0 187.778 9.66903   8
  23  15   0 204.744 9.89526   6
 -25 -15   0 10.2280 6.11319   2
  25 -15   0 9.65668 4.86891   6
  25 -15   0 12.5673 4.75495   2
 -25 -15   0 14.0651 4.42898   8
  25 -15   0 7.77389 5.23230   2
 -25 -15   0 10.2620 4.10075   2
 -25  15   0 5.71227 2.76439   8
  25  15   0 8.38281 3.89471   3
 -25  15   0 5.73738 4.15110   8
  25  15   0 10.3974 3.04318   7
 -25  15   0 8.60545 3.25549   4
  25  15   0 8.75793 2.87840   6
  27 -15   0 28.3991 5.71570   6
  27 -15   0 23.8079 6.53415   2
 -27 -15   0 42.2632 7.69522   8
  27 -15   0 34.5530 8.96301   2
 -27 -15   0 29.9103 7.62942   2
 -27 -15   0 60.4113 11.8911   2
  27  15   0 47.6575 7.39790   3
  27  15   0 30.8468 5.54391   6
 -27  15   0 40.2770 5.19427   8
 -27  15   0 30.9308 7.70002   8
 -27  15   0 35.8040 6.15076   4
  27  15   0 29.9617 5.78761   7
 -29 -15   0 12.6979 7.96770   2
 -29 -15   0 31.9196 8.40724   2
 -29 -15   0 23.2473 5.26605   8
  29 -15   0 25.4224 6.01174   2
  29 -15   0 20.1957 7.24369   2
  29 -15   0 19.7378 5.80132   6
 -29  15   0 29.2530 6.45624   4
  29  15   0 17.8757 3.79222   7
  29  15   0 29.5358 7.55370   3
 -29  15   0 30.1636 5.43579   8
  29  15   0 27.2135 5.85828   6
 -31 -15   0 43.2418 8.94421   8
 -31 -15   0 39.1550 9.20666   2
  31 -15   0 35.3298 6.69804   6
  31 -15   0 43.5224 10.8991   2
 -31  15   0 37.9834 7.04372   4
  31  15   0 37.1272 6.62940   6
 -31  15   0 40.2604 6.00538   8
  31  15   0 34.4403 8.14358   3
  31  15   0 30.5205 6.86723   7
 -33 -15   0 40.1474 9.66733   8
 -33 -15   0 40.7378 10.1329   2
  33 -15   0 35.1861 7.17457   6
  33 -15   0 40.7551 7.66055   2
 -33  15   0 48.8205 6.80972   8
 -33  15   0 42.5106 7.62369   4
  33  15   0 56.0353 8.84476   3
  33  15   0 39.3176 7.33125   6
  33  15   0 40.9597 7.67482   7
  35 -15   0 135.572 14.4974   2
 -35 -15   0 110.617 12.5526   2
 -35 -15   0 96.8091 11.8351   8
  35 -15   0 106.396 13.7188   6
  35  15   0 105.674 10.9150   3
  35  15   0 101.161 9.27936   6
 -35  15   0 106.963 8.80388   8
 -35  15   0 114.560 9.73772   4
  37 -15   0 109.077 19.6197   6
  37 -15   0 112.747 16.5004   2
 -37 -15   0 152.857 20.1150   8
 -37 -15   0 126.124 15.3368   2
 -37  15   0 133.787 10.1086   8
  37  15   0 153.663 12.0557   3
  37  15   0 134.530 10.8533   6
 -37  15   0 132.321 11.0600   4
 -39 -15   0 26.1896 8.47179   2
  39 -15   0 36.7893 9.18122   6
  39 -15   0 30.7677 9.59520   2
 -39 -15   0 57.0542 12.8430   8
  39  15   0 26.4502 6.19193   6
 -39  15   0 46.0433 10.0012   4
   0  16   0 15.9177 4.06754   5
   0  16   0 14.9606 2.83704   3
   0  16   0 16.9330 4.45568   8
   0  16   0 15.9900 3.17496   4
   0  16   0 20.4569 4.75788   7
   0  16   0 13.8711 3.51885   6
  -2  16   0 -1.4123 3.25763   6
   2  16   0 -2.5326 2.48660   7
   2  16   0 0.41343 2.76886   8
  -2  16   0 0.38809 2.66678   7
   2  16   0 1.98010 2.57512   3
   2  16   0 2.15882 2.90863   4
   2  16   0 0.02868 2.82909   5
  -2  16   0 -1.4991 2.38239   3
   2  16   0 -0.1310 3.27155   6
  -2  16   0 2.68633 1.85939   5
  -2  16   0 -1.4426 2.58489   8
  -2  16   0 1.31528 2.80884   4
  -4  16   0 24.7173 5.08871   7
   4  16   0 24.8225 5.27245   4
   4  16   0 17.3053 3.50711   6
   4  16   0 21.1874 4.68915   3
   4  16   0 13.7266 3.26815   8
   4  16   0 22.0650 4.43173   7
  -4  16   0 18.1537 4.81583   4
  -4  16   0 17.8036 4.24413   3
  -4  16   0 25.5606 6.48326   6
  -4  16   0 18.5285 4.13875   8
   4  16   0 30.6742 5.57393   5
  -6  16   0 1.40921 2.43864   8
   6  16   0 2.39331 3.62385   5
  -6  16   0 1.27117 2.88511   7
  -6  16   0 -1.0747 2.53488   4
   6  16   0 -1.5097 2.99957   4
  -6  16   0 -0.6591 3.58322   6
   6  16   0 0.77617 2.68155   3
   6  16   0 -0.8587 3.05131   8
  -6  16   0 -0.8246 2.32704   3
   6  16   0 1.99002 3.24831   6
   6  16   0 0.99000 2.45040   7
   8  16   0 4.31302 4.00105   5
   8  16   0 1.95046 3.27786   4
   8  16   0 2.10379 2.82328   3
  -8  16   0 -0.3003 2.45263   8
   8  16   0 -1.7917 3.35164   8
  -8  16   0 3.79151 2.98914   7
   8  16   0 3.48823 3.41064   6
  -8  16   0 1.14189 2.39765   3
  -8  16   0 2.47367 2.61918   4
  -8  16   0 4.07379 3.76562   6
   8  16   0 -0.5202 3.97238   7
 -10  16   0 6.38101 2.52829   8
  10  16   0 2.12940 3.41853   6
 -10  16   0 2.48692 3.17141   7
  10  16   0 4.98099 3.44043   4
  10  16   0 3.71967 3.62230   8
 -10  16   0 6.04706 4.04700   6
 -10  16   0 7.59213 3.22440   3
 -10  16   0 2.74009 2.66423   4
  10  16   0 5.56336 2.97931   3
 -10  16   0 3.40787 2.22950   3
  10  16   0 5.82333 3.66835   7
  10  16   0 8.82081 4.72319   5
  12 -16   0 -4.3063 3.43401   6
 -12 -16   0 1.82826 3.21491   8
 -12  16   0 2.80968 2.64648   4
  12  16   0 4.11197 3.59945   6
 -12  16   0 0.43917 2.81439   3
 -12  16   0 2.17688 3.23500   7
 -12  16   0 1.46795 2.08097   3
  12  16   0 1.34996 2.61614   7
  12  16   0 4.79652 4.70224   8
  12  16   0 5.43876 3.11306   3
  12  16   0 -1.3484 4.69713   5
 -12  16   0 3.42796 2.48814   8
  14 -16   0 57.3816 7.25592   6
 -14 -16   0 60.6285 6.38687   8
 -14  16   0 53.4699 4.06369   3
  14  16   0 38.4074 6.87331   6
 -14  16   0 56.3980 5.33494   4
  14  16   0 48.4812 6.89843   7
 -14  16   0 46.6682 4.81957   8
  14  16   0 65.4193 9.24642   3
  14  16   0 46.1045 9.70609   5
 -14  16   0 42.9511 4.84763   3
  16 -16   0 0.34449 3.92582   6
 -16 -16   0 6.29750 3.64498   8
 -16  16   0 5.40050 2.80953   4
 -16  16   0 4.34963 2.24164   8
  16  16   0 3.92936 4.04592   6
 -16  16   0 6.54478 2.08908   3
 -16  16   0 5.58591 2.76364   8
 -16  16   0 5.49498 1.71915   3
  16  16   0 5.96629 3.36315   3
 -18 -16   0 107.823 8.93099   8
  18 -16   0 128.305 9.90899   6
 -18  16   0 131.003 7.66419   8
  18  16   0 110.071 9.56416   6
  18  16   0 142.723 7.37016   6
  18  16   0 153.201 9.11154   3
 -18  16   0 125.517 7.93312   4
  18  16   0 148.300 8.68992   7
 -18  16   0 126.800 7.05410   8
 -20 -16   0 44.9455 7.11101   8
 -20 -16   0 38.8310 6.10040   2
  20 -16   0 47.8788 8.39377   6
 -20 -16   0 42.7535 5.46554   2
  20  16   0 47.5343 8.42470   6
 -20  16   0 48.0508 5.63599   8
 -20  16   0 41.2437 4.54871   8
 -20  16   0 54.2259 5.80423   4
  20  16   0 49.4070 6.95075   3
  20  16   0 44.6448 5.20333   7
  22 -16   0 144.634 11.0962   6
  22 -16   0 136.588 9.15617   2
 -22 -16   0 146.783 8.87665   2
 -22 -16   0 144.841 9.86419   2
 -22 -16   0 130.749 9.83897   8
  22 -16   0 123.493 8.73079   2
  22  16   0 116.861 9.40067   3
 -22  16   0 130.986 7.41499   8
 -22  16   0 123.772 8.47986   8
 -22  16   0 128.211 8.45196   4
  22  16   0 139.049 7.72188   6
  22  16   0 143.533 8.01362   7
  22  16   0 139.567 10.9446   6
  24 -16   0 177.710 12.7704   6
  24 -16   0 181.907 11.7774   2
 -24 -16   0 181.164 12.5723   2
  24 -16   0 190.238 11.2371   2
 -24 -16   0 186.283 11.7679   8
 -24 -16   0 182.214 10.8972   2
  24  16   0 196.823 9.90058   7
 -24  16   0 171.662 9.31485   8
  24  16   0 180.695 9.71159   6
  24  16   0 196.932 11.4721   3
 -24  16   0 190.559 10.3104   4
  24  16   0 161.629 12.8782   6
 -24  16   0 157.279 10.3961   8
  26 -16   0 17.4749 5.83365   6
  26 -16   0 14.9275 5.84947   2
 -26 -16   0 21.5125 6.61218   2
 -26 -16   0 15.8903 5.20693   8
 -26 -16   0 27.5271 7.78700   2
  26 -16   0 23.1388 5.41480   2
  26  16   0 23.3741 5.97220   7
  26  16   0 18.7060 3.56473   6
 -26  16   0 19.5877 3.88770   4
 -26  16   0 23.0953 4.94684   8
  26  16   0 27.8461 4.94370   3
 -28 -16   0 128.161 14.3749   2
 -28 -16   0 143.753 11.2055   8
  28 -16   0 128.185 11.4675   2
 -28 -16   0 128.685 10.7066   2
  28 -16   0 114.758 12.4712   6
  28 -16   0 125.555 13.1169   2
 -28  16   0 137.347 9.29162   4
  28  16   0 139.750 9.05879   7
  28  16   0 127.817 10.5434   3
  28  16   0 149.002 8.74953   6
 -28  16   0 139.473 9.86265   8
 -30 -16   0 2.11636 5.44496   2
  30 -16   0 -1.9716 5.91117   2
  30 -16   0 4.90577 6.39502   6
 -30 -16   0 -0.2575 5.59862   8
  30 -16   0 -0.7076 7.57166   2
 -30 -16   0 -6.1336 8.43392   2
 -30  16   0 -2.1572 4.08141   4
 -30  16   0 2.20106 3.64149   8
  30  16   0 -1.0332 4.12918   7
  30  16   0 -5.5964 4.68872   3
  30  16   0 -0.6076 3.91103   6
  32 -16   0 80.0008 12.6497   2
 -32 -16   0 91.9042 11.0447   2
 -32 -16   0 77.7631 11.1037   8
  32 -16   0 78.3978 13.1229   6
  32  16   0 78.5349 8.40218   6
 -32  16   0 90.5379 8.90303   4
 -32  16   0 80.4182 7.53440   8
  32  16   0 77.0217 8.67363   7
  32  16   0 76.0022 9.93520   3
  34 -16   0 6.52995 7.62500   6
 -34 -16   0 -0.2428 11.5170   2
 -34 -16   0 10.6254 6.76471   8
  34 -16   0 -2.8481 9.89722   2
 -34  16   0 4.95299 5.61418   8
  34  16   0 7.22637 4.86358   6
  34  16   0 8.69488 5.60199   3
 -34  16   0 4.67823 4.98083   4
 -36 -16   0 59.7954 12.7439   2
  36 -16   0 66.8585 14.9481   6
 -36 -16   0 68.8516 12.4430   8
  36 -16   0 58.0676 14.9597   2
 -36  16   0 60.6358 10.0424   4
  36  16   0 62.7309 11.4253   3
  36  16   0 58.1601 10.4508   6
   1  17   0 -2.0414 3.20273   4
  -1  17   0 -1.9250 2.75813   3
  -1  17   0 1.70375 3.06541   7
  -1  17   0 -2.3782 3.21266   4
  -1  17   0 -1.6666 3.02114   8
   1  17   0 -0.6072 3.77647   6
   1  17   0 -2.1462 2.86272   3
   1  17   0 -0.3803 3.21089   8
  -1  17   0 0.88544 2.13254   5
  -1  17   0 -1.7798 3.78906   6
   1  17   0 -1.8604 2.91822   7
   1  17   0 -0.6607 2.91460   5
  -3  17   0 23.9654 5.61928   4
  -3  17   0 34.5429 6.84954   6
  -3  17   0 28.4907 4.91065   8
  -3  17   0 36.4776 5.80188   7
   3  17   0 25.9453 5.35064   3
   3  17   0 31.7731 6.06328   4
  -3  17   0 33.5110 5.04638   3
   3  17   0 22.7838 5.23875   7
   3  17   0 23.3410 5.97198   5
   3  17   0 32.1236 6.59693   6
   3  17   0 21.3098 5.64202   8
   5  17   0 8.92497 3.19177   3
   5  17   0 6.43331 3.83348   6
   5  17   0 2.45781 3.47497   4
  -5  17   0 5.45284 4.24523   6
   5  17   0 5.70718 4.03061   8
  -5  17   0 5.22507 2.76221   3
  -5  17   0 6.30864 3.07345   4
   5  17   0 3.58003 2.88578   7
   5  17   0 7.19495 4.03298   5
  -5  17   0 9.87157 2.91853   8
  -5  17   0 1.54592 3.28745   7
  -7  17   0 9.36228 4.45902   6
   7  17   0 7.12790 3.77112   4
  -7  17   0 6.30275 3.45104   7
   7  17   0 4.97406 4.40119   5
  -7  17   0 5.41268 3.00998   4
  -7  17   0 8.86443 2.87462   8
   7  17   0 3.85272 3.19559   3
  -7  17   0 4.48253 2.69295   3
   7  17   0 6.43432 3.82163   6
   7  17   0 3.54607 3.77635   8
   7  17   0 4.50384 2.76212   7
   9  17   0 28.6472 7.09550   8
  -9  17   0 35.0881 4.67317   8
   9  17   0 42.1141 8.74672   5
   9  17   0 31.4538 6.02018   3
  -9  17   0 39.6196 4.74534   3
  -9  17   0 29.6079 6.32996   7
   9  17   0 38.4434 6.90875   4
   9  17   0 36.9401 5.05087   7
  -9  17   0 35.5794 5.53508   4
   9  17   0 30.2184 6.73133   6
 -11  17   0 13.3631 3.16336   4
  11  17   0 13.4964 2.88390   7
  11  17   0 6.77984 5.39496   5
  11  17   0 16.0150 4.13608   6
 -11  17   0 10.7182 3.70951   3
 -11  17   0 14.5996 3.89564   7
 -11  17   0 12.5505 2.58513   3
 -11  17   0 9.62317 2.83385   8
  11  17   0 10.2391 4.18481   4
 -13 -17   0 17.4397 4.16330   8
 -13  17   0 13.9817 4.03163   7
 -13  17   0 19.5437 5.32533   4
 -13  17   0 21.5726 4.46203   8
 -13  17   0 21.2948 4.00095   3
 -13  17   0 21.8831 3.39791   3
  13  17   0 17.5781 4.71756   7
  13  17   0 19.9869 3.89802   3
  13  17   0 15.2654 4.29272   6
  13  17   0 15.6230 7.21805   5
  15 -17   0 7.44528 4.53524   6
 -15 -17   0 10.0648 4.11844   8
  15  17   0 4.16465 2.88678   7
  15  17   0 7.11866 4.37628   6
  15  17   0 8.58123 3.78591   3
 -15  17   0 19.7431 5.34297   4
 -15  17   0 10.9636 2.94393   8
 -15  17   0 9.54937 2.11944   3
 -15  17   0 10.0580 2.44453   8
 -17 -17   0 -0.7504 4.22175   8
  17 -17   0 5.39618 4.71980   6
  17  17   0 2.55041 2.68128   6
  17  17   0 8.29338 3.91143   3
 -17  17   0 2.54154 2.43959   8
 -17  17   0 5.15531 3.25886   4
 -17  17   0 3.40352 2.98271   8
  17  17   0 -0.0631 4.68075   6
  17  17   0 3.90082 2.86142   7
 -19 -17   0 103.753 8.89444   8
  19 -17   0 100.310 11.6690   6
 -19  17   0 87.7998 6.72668   8
  19  17   0 95.5295 6.81671   7
  19  17   0 99.8482 8.70260   3
  19  17   0 94.7052 7.28248   6
 -19  17   0 98.0385 5.98224   8
  19  17   0 93.6120 9.70744   6
 -19  17   0 96.1267 7.42435   4
 -21 -17   0 11.6735 4.94182   8
  21 -17   0 3.89191 5.32193   6
 -21  17   0 6.41748 3.53015   4
  21  17   0 1.45985 3.85338   6
  21  17   0 1.73452 4.12492   3
  21  17   0 5.52275 3.23547   7
 -21  17   0 6.83132 2.71853   8
  23 -17   0 31.1563 6.35057   6
 -23 -17   0 23.0374 5.51717   8
 -23  17   0 36.9869 4.88430   8
  23  17   0 38.5780 8.09031   3
  23  17   0 28.0526 6.04885   7
  23  17   0 44.4016 5.78302   6
 -23  17   0 41.0298 6.67871   4
 -25 -17   0 10.6653 5.49294   8
 -25 -17   0 9.04455 4.33619   2
  25 -17   0 14.3420 6.22813   6
 -25 -17   0 9.11011 5.44102   2
 -25  17   0 12.5000 3.19350   8
 -25  17   0 13.3495 4.10349   4
  25  17   0 11.5268 3.62962   6
  25  17   0 9.60767 4.76893   3
  27 -17   0 0.83831 8.13710   2
 -27 -17   0 5.85601 4.89773   2
 -27 -17   0 13.8665 6.73036   2
 -27 -17   0 1.79293 5.87135   8
  27 -17   0 2.70578 6.62735   6
  27 -17   0 8.34904 5.25693   2
  27  17   0 8.34628 3.85290   6
 -27  17   0 6.91353 4.21761   4
 -27  17   0 5.69513 3.37535   8
  27  17   0 10.1991 4.95834   3
  27  17   0 6.93227 4.04907   7
 -29 -17   0 4.65343 6.22944   8
  29 -17   0 1.81911 7.06135   6
  29 -17   0 -0.2868 5.88278   2
 -29 -17   0 1.56153 5.32352   2
  29 -17   0 2.52603 8.00712   2
 -29 -17   0 -2.2491 7.69368   2
 -29  17   0 -2.5733 4.34011   4
  29  17   0 -1.9687 4.17619   6
  29  17   0 2.03974 4.38199   7
  29  17   0 -2.0929 6.17135   3
  31 -17   0 9.70184 6.82164   2
  31 -17   0 15.4399 7.90575   6
 -31 -17   0 15.4621 7.27899   2
  31 -17   0 10.9334 9.55497   2
 -31 -17   0 12.5184 6.97775   8
 -31 -17   0 6.00221 9.06481   2
 -31  17   0 16.8956 5.00285   4
  31  17   0 18.9655 5.14078   6
  31  17   0 16.2366 5.10290   7
  31  17   0 17.7999 6.01833   3
 -33 -17   0 21.3237 7.16486   2
  33 -17   0 20.3328 7.87707   2
 -33 -17   0 7.27875 7.53871   8
 -33 -17   0 -12.679 10.4273   2
  33 -17   0 -8.1944 14.4826   2
 -33  17   0 18.6039 5.55324   4
  33  17   0 26.7342 6.52729   3
   0  18   0 7.45640 2.51650   5
   0  18   0 8.42276 3.61143   7
   0  18   0 5.93263 7.08006   6
   0  18   0 10.7094 3.44433   3
   0  18   0 11.6182 3.96223   4
   0  18   0 7.88909 3.69521   8
   2  18   0 7.04193 3.94588   8
   2  18   0 -1.4512 3.36670   7
   2  18   0 6.64267 4.32901   6
  -2  18   0 1.02327 4.56713   6
  -2  18   0 2.73828 3.67306   4
  -2  18   0 4.45810 3.25604   3
  -2  18   0 -1.2653 3.53948   7
   2  18   0 2.61711 3.33191   5
   2  18   0 2.38649 3.35729   3
  -2  18   0 2.48368 3.42414   8
   2  18   0 1.91691 3.84253   4
   4  18   0 44.5065 6.44549   3
   4  18   0 46.6451 6.17455   7
  -4  18   0 44.6276 5.82183   3
  -4  18   0 45.5600 5.74437   8
   4  18   0 45.9365 7.20441   5
  -4  18   0 50.3856 6.56830   4
   4  18   0 36.5270 7.61530   6
  -4  18   0 40.7780 8.69361   6
   4  18   0 32.2399 4.85380   4
  -4  18   0 40.0290 6.89423   7
  -6  18   0 3.77703 3.03434   3
  -6  18   0 0.85394 3.41974   4
  -6  18   0 4.60271 3.19441   8
   6  18   0 2.43534 4.78870   5
   6  18   0 1.74519 3.14543   7
   6  18   0 -3.5204 4.47111   8
   6  18   0 -0.1189 4.31058   6
  -6  18   0 -1.7180 3.76089   7
   6  18   0 -0.5783 3.53353   3
   6  18   0 0.85770 4.05460   4
  -8  18   0 120.441 8.21371   4
  -8  18   0 125.038 9.12392   7
   8  18   0 105.705 10.6577   5
   8  18   0 111.688 9.60550   8
   8  18   0 129.557 9.37183   4
   8  18   0 109.234 9.21219   6
  -8  18   0 121.332 7.44846   3
   8  18   0 126.284 7.80171   7
   8  18   0 117.413 11.0329   3
  -8  18   0 101.755 7.22485   8
 -10  18   0 44.2694 6.47376   4
 -10  18   0 51.1378 5.29344   8
 -10  18   0 44.9892 8.12639   3
  10  18   0 42.6725 10.7097   5
  10  18   0 54.4769 5.95215   7
 -10  18   0 50.5956 5.42797   3
  10  18   0 47.0475 7.04491   3
  10  18   0 52.0847 7.82423   6
  10  18   0 45.9244 8.08747   4
 -10  18   0 49.9843 7.70443   7
  12  18   0 40.7749 8.35017   4
  12  18   0 40.9847 7.84793   6
 -12  18   0 40.7045 6.32626   8
  12  18   0 34.5391 5.63793   7
  12  18   0 51.4256 7.30903   3
  12  18   0 38.5389 8.59038   5
 -12  18   0 42.9555 6.36680   4
 -12  18   0 36.3314 6.99401   3
 -12  18   0 34.7656 4.96011   3
 -12  18   0 41.7075 7.79725   7
  14  18   0 12.8293 3.36350   7
 -14  18   0 21.2404 4.81467   7
 -14  18   0 21.2765 4.24167   3
 -14  18   0 17.3979 4.09089   8
  14  18   0 14.8130 5.09864   4
 -14  18   0 18.3659 3.77287   4
 -14  18   0 16.3221 5.51927   3
  14  18   0 15.6157 4.32935   3
 -16 -18   0 32.0340 8.02877   8
  16  18   0 38.5406 5.26846   6
  16  18   0 43.7457 7.79959   3
 -16  18   0 29.6745 6.59172   4
 -16  18   0 40.4807 8.29459   7
  16  18   0 37.5275 5.74965   7
  18 -18   0 20.8715 5.87120   6
 -18 -18   0 33.4495 8.28517   8
 -18  18   0 24.1928 6.44260   4
  18  18   0 14.6984 3.38072   6
  18  18   0 19.5170 3.52250   7
  18  18   0 20.5019 4.79565   3
 -20 -18   0 38.1792 8.96367   8
  20 -18   0 41.3449 10.4599   6
  20  18   0 33.7364 8.54061   3
  20  18   0 37.5151 8.40930   6
  20  18   0 32.8105 6.25156   7
 -20  18   0 36.6057 7.02196   4
 -22 -18   0 82.1936 10.0973   8
  22 -18   0 59.9083 11.4823   6
 -22  18   0 72.2533 7.93942   4
  22  18   0 68.6511 9.53521   3
  22  18   0 67.8571 7.12674   7
  24 -18   0 -4.1145 6.51082   6
 -24 -18   0 0.88537 5.95214   8
  24  18   0 -0.9893 3.97810   6
  24  18   0 -4.0416 5.13174   3
 -24  18   0 2.87027 4.31629   4
  24  18   0 1.31181 3.95622   7
  26 -18   0 36.4793 7.87310   6
 -26 -18   0 52.7023 11.1741   8
  26  18   0 51.2131 9.40428   7
 -26  18   0 38.9058 8.27879   4
  26  18   0 45.4267 10.2636   3
 -28 -18   0 47.8550 10.8096   2
  28 -18   0 61.6842 14.2215   6
 -28 -18   0 50.8077 9.09715   2
 -28 -18   0 72.9106 12.0884   8
 -28  18   0 54.1379 8.98444   4
  28  18   0 63.4310 10.7993   3
 -30 -18   0 9.61826 7.82387   2
 -30 -18   0 12.4523 7.57955   8
  30 -18   0 -0.2495 8.62950   6
  30 -18   0 8.76117 6.59925   2
 -30 -18   0 5.62217 6.03630   2
 -30  18   0 16.6380 5.92011   4
  30  18   0 15.6794 6.62504   3
  -1  19   0 86.5374 8.35993   4
   1  19   0 82.1618 7.97461   7
   1  19   0 69.7657 8.63640   4
  -1  19   0 85.5761 7.53862   3
   1  19   0 71.4617 7.61390   3
  -1  19   0 77.7607 8.21477   7
   3  19   0 20.1413 4.85324   4
   3  19   0 20.2472 4.10333   7
  -3  19   0 16.8770 4.40970   7
  -3  19   0 13.4806 4.30745   4
   3  19   0 12.5712 4.08438   3
  -3  19   0 16.0838 3.88646   3
  -5  19   0 68.0837 7.54473   4
  -5  19   0 48.8889 6.70698   3
   5  19   0 52.7239 6.97200   7
  -5  19   0 53.5828 8.18016   7
   5  19   0 59.7273 8.72648   4
   5  19   0 64.2519 7.69877   3
  -7  19   0 3.52583 4.54931   7
   7  19   0 11.2722 3.77251   7
   7  19   0 2.87635 4.09462   3
  -7  19   0 10.7843 3.55878   3
   7  19   0 1.31983 4.88654   4
  -7  19   0 11.6683 4.07626   4
   9  19   0 18.7652 4.54806   3
   9  19   0 24.5050 5.42797   4
  -9  19   0 23.9130 4.97224   7
   9  19   0 27.6888 6.33803   7
  -9  19   0 26.8792 6.91646   4
  -9  19   0 13.9233 3.57032   3
 -11  19   0 10.0848 3.23717   3
 -11  19   0 8.76318 4.97375   7
  11  19   0 3.76684 4.40012   3
  11  19   0 10.6100 3.65050   7
  11  19   0 3.52452 5.31722   4
 -11  19   0 9.95094 4.11941   4
 -13  19   0 14.7121 3.10196   3
  13  19   0 14.9047 4.74232   3
  13  19   0 14.7245 3.76416   7
 -13  19   0 13.1820 4.13752   4
  13  19   0 12.5099 9.43313   4
 -13  19   0 5.76313 6.11347   7
  15  19   0 -2.6343 3.21442   6
  15  19   0 -2.3773 4.66106   3
 -15  19   0 2.44872 4.04324   4
 -15  19   0 3.32342 5.16243   7
 -15  19   0 -0.3198 2.66283   3
  15  19   0 3.78991 3.58971   7
  15  19   0 6.89262 5.88185   4
 -17  19   0 27.4264 7.40108   4
  17  19   0 42.7673 9.06856   3
  17  19   0 21.4019 6.36183   4
 -17  19   0 40.1169 9.83370   7
  17  19   0 31.7958 5.81918   6
  17  19   0 38.0302 6.44035   7
 -19 -19   0 11.8496 6.06770   8
  19  19   0 16.4045 5.93461   6
 -19  19   0 12.2764 4.49727   4
  19  19   0 15.9789 4.09871   7
 -19  19   0 13.4004 5.81665   7
  19  19   0 6.68815 5.27775   3
 -21 -19   0 2.90585 6.33755   8
  21 -19   0 9.88289 7.18124   6
  21  19   0 6.80134 5.58867   3
 -21  19   0 9.46794 4.67336   4
 -23 -19   0 18.7334 7.04214   8
  23 -19   0 14.9456 7.91499   6
 -23  19   0 20.9866 4.94416   4
  23  19   0 23.6447 6.13493   3
  25 -19   0 -1.5388 8.09115   6
 -25 -19   0 3.76982 7.21147   8
 -25  19   0 2.23518 5.19678   4
  25  19   0 2.47373 6.06928   3
   0  20   0 155.947 10.4072   3
   0  20   0 140.672 10.7893   7
   0  20   0 162.906 11.2357   4
  -2  20   0 35.9144 8.51006   7
  -2  20   0 20.1011 4.58720   3
  -2  20   0 18.1231 5.05135   4
   2  20   0 14.3600 4.78945   7
   2  20   0 23.1737 5.49911   4
   2  20   0 28.7550 7.68880   3
  -4  20   0 3.34195 4.21616   3
   4  20   0 2.35733 5.42975   4
  -4  20   0 3.35679 4.67674   4
   4  20   0 -0.9837 4.53954   3
   4  20   0 2.77641 4.29079   7
  -4  20   0 0.34196 4.98339   7
  -6  20   0 3.70585 4.58779   4
  -6  20   0 4.16941 4.09715   3
  -6  20   0 4.77826 5.17632   7
   6  20   0 5.02186 4.73369   3
   6  20   0 3.01498 4.24863   7
   6  20   0 3.40076 5.44080   4
   8  20   0 100.626 9.58928   3
  -8  20   0 87.9311 7.86826   3
  -8  20   0 70.9616 10.1866   7
   8  20   0 88.6328 8.29889   7
   8  20   0 74.6546 10.6781   4
  -8  20   0 79.2911 8.96852   4
 -10  20   0 54.1439 11.4056   7
 -10  20   0 60.1452 7.10532   3
  10  20   0 65.5316 7.73893   7
 -10  20   0 57.5165 8.40369   4
  10  20   0 69.6213 9.29703   3
 -12  20   0 6.60239 5.83596   7
  12  20   0 -1.5789 5.16730   3
  12  20   0 10.5564 6.34838   4
 -12  20   0 -0.0363 4.55357   4
  12  20   0 4.75461 4.11181   7
 -14  20   0 54.7755 8.51769   4
  14  20   0 57.3480 11.4341   4
 -14  20   0 57.2921 10.7293   7
  14  20   0 57.9966 9.82106   3
 -16  20   0 5.53093 6.27496   7
 -16  20   0 11.6171 4.77295   4
  16  20   0 8.07494 5.78910   3
  16  20   0 13.6888 7.14941   4
 -18  20   0 -1.7134 4.87793   4
 -18  20   0 -4.6109 6.51133   7
  18  20   0 16.0410 7.56961   4
  18  20   0 2.00131 6.19375   3
  20  20   0 6.96121 7.96271   4
  20  20   0 0.68003 6.13379   3
 -20  20   0 -1.4354 7.16183   4
 -20  20   0 -2.2961 6.78807   7
   1  21   0 6.71785 5.14323   3
  -1  21   0 7.15767 5.51029   7
  -1  21   0 3.30126 5.26693   3
   1  21   0 4.13300 5.84888   4
  -1  21   0 5.11254 5.65621   4
   1  21   0 0.48919 5.38252   7
   3  21   0 8.84562 6.21148   4
  -3  21   0 13.0689 5.48819   4
   3  21   0 8.02246 5.16657   7
   3  21   0 13.8189 5.35205   3
  -3  21   0 7.32396 5.74766   7
  -3  21   0 6.24384 4.99459   3
  -5  21   0 4.41040 5.88635   7
  -5  21   0 10.8329 5.43941   4
  -5  21   0 5.00989 4.84886   3
   5  21   0 7.12627 5.15083   7
   5  21   0 3.25409 6.45013   4
   5  21   0 9.75690 5.43492   3
   7  21   0 10.2682 8.12977   4
  -7  21   0 9.04310 5.35945   4
  -7  21   0 12.4615 4.76762   3
  -7  21   0 11.9611 10.5247   7
   7  21   0 14.0313 5.64477   3
  -9  21   0 90.8746 10.2582   4
   9  21   0 108.609 13.0539   4
  -9  21   0 106.125 12.2449   7
   9  21   0 129.863 11.3207   3
 -11  21   0 -5.5036 7.26061   4
  11  21   0 4.36616 7.07575   4
  11  21   0 -1.3614 5.88281   3
 -11  21   0 2.28208 6.50175   7
  13  21   0 104.803 11.8020   3
  13  21   0 111.448 13.5803   4
 -13  21   0 94.1995 13.1153   7
  54   0  -1 -0.1978 5.14189   3
 -54   0   1 9.13182 14.3028   2
  54   0  -1 -4.9839 9.32644   9
 -54   0   1 0.61223 6.29233   8
  54   0  -1 -0.4416 16.6325   2
  54   0  -1 5.40840 8.29280   9
 -54   0   1 -5.6400 11.0752   9
  54   0  -1 1.99841 6.65639   6
 -54   0   1 -1.7834 7.33644   9
 -52   0   1 3.47192 6.51676   9
  52   0  -1 -1.1707 4.41972   3
 -52   0   1 2.60007 8.06819   8
  52   0  -1 -1.3898 7.91489   6
  52   0  -1 8.46333 14.2482   2
  52   0  -1 -2.0013 7.08930   9
 -52   0   1 9.03440 12.2189   2
  52   0  -1 -4.9236 7.26240   9
 -52   0   1 2.90325 8.10532   9
  50   0  -1 0.45704 3.80590   3
 -50   0   1 4.93455 5.93671   9
  50   0  -1 1.81983 5.04301   6
 -50   0   1 4.70208 10.6105   2
 -50   0   1 -1.2621 4.72627   8
  50   0  -1 -0.2490 6.38302   9
  50   0  -1 1.18781 12.1930   2
 -50   0   1 -1.1516 6.83984   9
  50   0  -1 -3.1944 6.08436   9
 -48   0   1 2.19704 4.96768   9
 -48   0   1 8.87211 9.34872   2
  48   0  -1 -4.2041 5.68634   9
  48   0  -1 -6.2084 10.0782   2
 -48   0   1 -2.4645 6.10064   9
 -48   0   1 -6.7821 4.39087   8
  48   0  -1 -3.4298 4.41412   6
  48   0  -1 -0.3058 5.39125   9
  48   0  -1 1.70643 6.10161   3
  46   0  -1 2.09314 3.05632   3
 -46   0   1 2.72152 5.26228   9
 -46   0   1 -2.8005 3.67543   8
 -46   0   1 0.01541 4.49034   9
  46   0  -1 -0.9808 5.05730   9
  46   0  -1 -3.0782 8.93921   2
  46   0  -1 2.38034 3.89284   6
  46   0  -1 -3.4741 4.78809   9
 -46   0   1 4.12931 7.84789   2
  44   0  -1 -2.8804 2.71360   3
  44   0  -1 0.64085 3.55486   6
 -44   0   1 6.39699 4.77554   9
  44   0  -1 -2.2010 8.38449   2
 -44   0   1 -3.8796 3.47962   8
  44   0  -1 -2.6549 4.10406   9
 -44   0   1 1.18540 3.97010   9
 -44   0   1 5.83851 10.0185   2
 -42   0   1 1.59362 4.03796   9
  42   0  -1 6.88250 7.42072   2
  42   0  -1 1.29302 3.88013   9
 -42   0   1 0.18096 3.45437   9
  42   0  -1 0.75210 2.43641   3
  42   0  -1 2.03929 3.62933   9
  42   0  -1 1.42706 3.18262   6
 -42   0   1 4.40895 6.69714   2
 -42   0   1 0.17154 2.89149   8
  40   0  -1 2.09468 3.26618   9
 -40   0   1 1.43690 3.13954   9
  40   0  -1 -7.9464 10.8347   2
  40   0  -1 3.08500 2.27219   3
  40   0  -1 -0.3131 3.46771   9
  40   0  -1 -2.1757 2.58900   6
 -40   0   1 -0.5551 5.42553   2
 -40   0   1 0.21004 2.76634   8
 -40   0   1 -0.2194 3.46905   9
  38   0  -1 -0.3752 2.47723   6
 -38   0   1 2.18571 3.14836   9
 -38   0   1 0.19957 2.49183   8
  38   0  -1 -0.9708 1.92859   3
  38   0  -1 -0.0073 3.05890   9
 -38   0   1 -2.3226 2.73740   9
  38   0  -1 0.11149 2.83330   9
  38   0  -1 -4.0327 5.26195   2
 -38   0   1 -0.8988 4.36075   2
 -36   0   1 1.47205 2.79472   9
  36   0  -1 4.72388 2.85748   9
  36   0  -1 -1.7090 2.50921   9
  36   0  -1 -0.2029 1.73214   3
 -36   0   1 -4.0311 2.36607   9
 -36   0   1 0.28493 2.20246   8
  36   0  -1 4.99766 7.91593   2
  36   0  -1 -3.7586 4.79313   2
 -36   0   1 -1.8234 4.18606   2
  36   0  -1 0.87643 2.26739   6
 -34   0   1 2.84450 5.07465   3
  34   0  -1 -1.6851 6.48317   2
 -34   0   1 0.97590 3.83718   2
  34   0  -1 -0.7293 1.55430   3
 -34   0   1 0.30723 1.87723   8
 -34   0   1 -0.6536 2.05961   9
 -34   0   1 -2.3297 2.38977   9
  34   0  -1 0.77288 2.40623   9
  34   0  -1 1.93688 2.27229   9
 -34   0   1 1.90826 7.10662   2
  34   0  -1 -1.0031 1.84767   6
  34   0  -1 0.35885 4.49074   2
 -32   0   1 0.95100 2.37068   3
 -32   0   1 -0.4778 1.77575   8
  32   0  -1 0.54510 2.12458   9
 -32   0   1 0.16059 2.53642   6
 -32   0   1 2.24751 3.52152   2
  32   0  -1 0.15897 1.69668   6
 -32   0   1 0.56970 5.73713   2
  32   0  -1 1.66888 1.99705   9
  32   0  -1 -0.0805 1.41014   3
 -32   0   1 2.26138 1.89457   9
 -32   0   1 1.87416 2.21773   9
 -32   0   1 3.99590 2.68690   7
  32   0  -1 2.58209 5.53686   2
  32   0  -1 0.67806 2.51608   8
  32   0  -1 -1.3044 5.12444   2
 -30   0   1 -0.0273 2.25575   7
 -30   0   1 -1.7323 1.50493   8
  30   0  -1 -0.0301 1.60153   6
 -30   0   1 1.02247 1.58983   4
  30   0  -1 0.53627 1.25332   3
 -30   0   1 -2.6496 1.98704   3
 -30   0   1 0.31773 1.64495   9
 -30   0   1 1.84537 3.20430   2
  30   0  -1 -0.8750 4.45353   2
  30   0  -1 1.40016 3.66950   2
  30   0  -1 0.84799 1.94097   9
 -30   0   1 1.00321 2.24780   6
  30   0  -1 -1.2646 2.38256   8
 -30   0   1 -1.4090 1.91722   9
  30   0  -1 -0.7449 2.10636   4
  30   0  -1 0.48155 1.74625   9
 -30   0   1 -4.5445 5.39605   2
 -28   0   1 -1.4912 2.01947   7
  28   0  -1 2.82809 3.93792   2
  28   0  -1 -0.8644 2.30279   4
 -28   0   1 -0.8592 1.40457   8
 -28   0   1 -0.0637 2.23560   6
 -28   0   1 -1.2584 6.22419   2
 -28   0   1 4.14322 2.78572   2
  28   0  -1 1.68371 2.44843   8
 -28   0   1 -0.7515 1.64950   9
  28   0  -1 0.86949 1.15031   3
  28   0  -1 -1.1023 1.57888   9
  28   0  -1 -1.9734 2.96689   2
 -28   0   1 0.40471 1.36886   4
  28   0  -1 0.98738 1.39535   6
  28   0  -1 0.76239 1.69725   9
 -28   0   1 1.29279 1.49256   9
 -28   0   1 0.69100 1.71601   3
  26   0  -1 -1.2118 2.56641   2
  26   0  -1 1.05107 3.20174   2
  26   0  -1 0.09653 1.36220   9
 -26   0   1 -0.5380 1.45664   3
 -26   0   1 0.24262 1.35384   9
 -26   0   1 1.27892 1.24310   4
  26   0  -1 0.09789 1.47660   9
 -26   0   1 0.42711 4.15619   2
 -26   0   1 -1.0944 1.22682   8
  26   0  -1 -0.9835 1.65683   4
  26   0  -1 -1.2243 1.21725   6
 -26   0   1 3.49690 3.91288   2
 -26   0   1 1.31958 1.80454   7
  26   0  -1 0.92384 1.02734   3
 -26   0   1 0.31441 1.68462   9
 -26   0   1 -0.0460 1.66937   6
  26   0  -1 0.31646 1.75240   8
  24   0  -1 -0.1536 1.40178   8
  24   0  -1 1.33962 2.35090   2
  24   0  -1 1.02693 0.97160   3
 -24   0   1 1.07258 2.23393   2
 -24   0   1 0.57756 1.35878   9
 -24   0   1 0.06778 1.46353   7
  24   0  -1 0.08682 1.08712   6
  24   0  -1 -0.8856 2.58283   2
 -24   0   1 0.92573 3.20969   2
  24   0  -1 0.00445 2.03141   9
 -24   0   1 0.37715 1.06988   8
 -24   0   1 0.47732 1.30718   3
 -24   0   1 0.47690 1.11077   9
 -24   0   1 -0.9153 1.38350   6
  24   0  -1 1.11674 1.41640   4
  24   0  -1 -0.4248 1.19916   9
  22   0  -1 1.05150 2.25295   2
  22   0  -1 0.17905 0.76441   3
 -22   0   1 -1.7645 2.92867   2
 -22   0   1 0.61162 1.16049   9
  22   0  -1 0.83866 1.17988   9
  22   0  -1 0.15888 1.20563   4
 -22   0   1 -0.8091 0.87900   4
 -22   0   1 -0.2356 1.14865   6
 -22   0   1 -0.9220 1.21154   7
  22   0  -1 -0.8021 1.10207   9
  22   0  -1 -0.1178 0.88003   6
  22   0  -1 1.28560 2.45842   2
 -22   0   1 -0.2907 1.10975   3
  22   0  -1 -0.7696 1.16302   8
 -22   0   1 -0.9484 0.99330   9
 -22   0   1 0.13461 0.90038   8
 -22   0   1 2.29599 2.73384   2
  20   0  -1 -0.9310 0.81927   6
  20   0  -1 -0.3381 0.95608   9
 -20   0   1 0.39792 0.86628   8
 -20   0   1 -0.4004 2.47504   2
  20   0  -1 -1.4498 2.07108   2
 -20   0   1 1.73470 2.59033   2
  20   0  -1 -0.1016 0.69259   3
 -20   0   1 0.43147 1.00812   9
 -20   0   1 -1.1319 1.02727   7
  20   0  -1 0.31174 1.05402   8
 -20   0   1 -0.0992 0.97670   6
  20   0  -1 -0.0717 1.01224   4
 -20   0   1 -0.5179 0.93302   3
  20   0  -1 -1.4575 1.67935   2
 -20   0   1 0.29820 0.85614   4
 -20   0   1 0.36066 0.86576   9
  20   0  -1 0.22852 0.93528   9
  18   0  -1 0.36384 0.89677   8
  18   0  -1 -0.6046 0.83192   4
 -18   0   1 0.43226 3.20340   2
 -18   0   1 0.36280 0.74844   8
  18   0  -1 0.08216 0.83594   9
  18   0  -1 0.65116 0.93420   9
  18   0  -1 0.54933 0.80248   6
 -18   0   1 0.85476 0.82068   3
 -18   0   1 -0.3090 0.83828   6
  18   0  -1 1.55283 2.25995   2
 -18   0   1 0.53300 0.81992   9
  18   0  -1 -0.0461 1.80588   2
 -18   0   1 -0.4109 0.87273   9
 -18   0   1 0.42975 0.94183   7
  18   0  -1 0.65351 0.65169   3
 -18   0   1 -1.2054 1.35308   2
 -18   0   1 0.42385 0.74491   4
 -16   0   1 1.27647 0.77061   6
 -16   0   1 1.14569 1.73080   2
  16   0  -1 0.56628 0.73350   9
 -16   0   1 0.35573 0.81417   7
 -16   0   1 -0.3786 1.41316   2
  16   0  -1 -0.3023 0.70503   4
  16   0  -1 0.09070 0.68521   9
 -16   0   1 -0.3323 0.88762   9
  16   0  -1 -0.0095 0.74457   8
 -16   0   1 0.52708 0.66344   4
  16   0  -1 -0.2026 1.84830   2
 -16   0   1 0.73849 0.66776   3
  16   0  -1 -0.1551 1.60359   2
 -16   0   1 -0.3458 0.61437   9
  16   0  -1 -0.5504 0.63049   6
 -16   0   1 0.71275 0.66228   8
  16   0  -1 -0.0094 0.53880   3
 -14   0   1 -0.1773 0.68005   7
  14   0  -1 0.69305 0.62029   9
  14   0  -1 -0.9759 0.62505   4
 -14   0   1 0.57045 0.99848   2
 -14   0   1 -0.7273 0.53545   8
 -14   0   1 -0.4133 0.60489   6
 -14   0   1 -0.1987 0.55657   3
  14   0  -1 -0.7558 0.53746   6
 -14   0   1 -0.2137 0.55675   4
 -14   0   1 -0.4718 1.50672   2
  14   0  -1 0.27147 0.48529   3
  14   0  -1 0.08281 0.63601   8
 -14   0   1 0.65312 0.55906   9
  14   0  -1 1.22249 1.65900   2
  14   0  -1 0.22927 0.56574   9
  14   0  -1 0.60106 1.23297   2
 -12   0   1 -0.3634 0.41584   8
  12   0  -1 0.31270 0.39769   3
 -12   0   1 0.94258 0.47033   9
  12   0  -1 0.16217 0.55060   8
  12   0  -1 0.36992 0.78731   9
 -12   0   1 0.84924 0.58608   7
 -12   0   1 0.13667 0.50870   6
  12   0  -1 -0.4298 0.42273   6
  12   0  -1 -1.4256 1.34968   2
  12   0  -1 0.35896 1.29771   2
 -12   0   1 0.02478 0.42346   4
  12   0  -1 0.38396 0.51964   9
 -12   0   1 -0.9586 1.77664   2
 -12   0   1 0.21846 0.45518   3
 -12   0   1 0.24087 0.92406   2
  12   0  -1 0.06280 0.52086   4
 -10   0   1 -0.1424 1.00391   2
 -10   0   1 0.63177 0.43560   6
  10   0  -1 0.68862 0.44161   8
 -10   0   1 0.31094 0.37251   3
 -10   0   1 0.53902 0.38370   4
 -10   0   1 0.28158 0.44594   7
  10   0  -1 -0.0749 0.41620   9
  10   0  -1 0.20557 0.33484   3
 -10   0   1 0.04031 0.40327   8
 -10   0   1 -0.3501 0.97252   2
  10   0  -1 0.35851 1.08564   2
  10   0  -1 0.39821 0.40928   6
  10   0  -1 0.07870 0.84264   2
  10   0  -1 0.26523 0.40303   4
 -10   0   1 0.58721 0.39348   9
  -8   0   1 -1.0197 0.78369   2
   8   0  -1 -0.3296 0.71587   2
  -8   0   1 0.08527 0.29950   9
  -8   0   1 -0.0878 0.27943   3
   8   0  -1 0.09155 0.33179   9
   8   0  -1 0.23771 0.32918   4
   8   0  -1 0.48345 0.29342   6
  -8   0   1 0.10520 0.28284   4
   8   0  -1 0.01316 0.61820   2
  -8   0   1 0.79798 0.34164   6
  -8   0   1 0.15314 1.09180   2
  -8   0   1 0.37206 0.30085   8
  -8   0   1 0.44173 0.35174   7
   8   0  -1 0.51054 0.34205   8
   8   0  -1 0.12903 0.25690   3
   6   0  -1 0.43445 0.21393   3
   6   0  -1 0.98122 0.48677   2
   6   0  -1 1.10073 0.27296   9
  -6   0   1 0.32490 0.24504   8
  -6   0   1 -0.0075 0.19504   3
   6   0  -1 -0.1778 0.22781   8
  -6   0   1 0.23688 0.21971   4
  -6   0   1 -0.0037 0.48095   2
  -6   0   1 0.10146 0.20677   9
  -6   0   1 0.97177 0.26509   6
   6   0  -1 0.34992 0.22379   4
  -6   0   1 -0.2474 0.72832   2
   6   0  -1 0.40364 0.74448   2
   6   0  -1 0.03795 0.22155   6
  -4   0   1 0.41701 0.15036   9
   4   0  -1 0.66059 0.14771   4
   4   0  -1 0.01580 0.14985   8
  -4   0   1 0.39527 0.29821   2
  -4   0   1 -0.1300 0.14094   6
   4   0  -1 -0.1621 0.43076   2
   4   0  -1 0.29567 0.26905   2
  -4   0   1 0.28199 0.24927   2
  -4   0   1 0.35304 0.13590   3
   4   0  -1 0.02267 0.13284   3
  -2   0  -1 -0.0119 0.15487   8
   2   0   1 0.42462 0.14360   4
  -2   0  -1 0.26005 0.13328   7
  -2   0  -1 0.02243 0.39907   2
   2   0   1 0.16577 0.16176   7
  -2   0  -1 -0.0002 0.24105   2
  -2   0  -1 0.05371 0.12469   9
  -2   0  -1 0.02221 0.11894   4
   2   0   1 0.11929 0.12973   9
   2   0   1 0.11474 0.37020   2
   2   0   1 0.18952 0.12523   5
   2   0   1 0.07918 0.15107   6
  -2   0  -1 0.14274 0.12988   6
   2   0   1 0.08293 0.22840   2
   4   0   1 -0.4077 0.53464   2
  -4   0  -1 0.41682 0.22546   8
  -4   0  -1 0.47114 0.51790   2
   4   0   1 0.34676 0.23149   9
   4   0   1 -0.0154 0.21988   8
  -4   0  -1 -0.6117 0.35093   2
   4   0   1 0.24959 0.19893   6
  -4   0  -1 0.39756 0.19614   4
  -4   0  -1 0.26792 0.20881   6
  -4   0  -1 -0.0853 0.19621   7
   4   0   1 0.28965 0.20573   7
  -4   0  -1 0.46553 0.22164   9
   4   0   1 0.10612 0.19242   4
   4   0   1 0.38393 0.19593   3
   4   0   1 0.15239 0.40541   2
  -6   0  -1 -0.1367 0.87471   2
   6   0   1 -0.2513 0.78268   2
   6   0   1 0.45169 0.33601   9
  -6   0  -1 -0.0522 0.27084   4
  -6   0  -1 -0.3683 0.28099   9
   6   0   1 0.60717 0.33533   4
   6   0   1 -0.3315 0.28510   8
  -6   0  -1 -0.3354 0.27031   7
  -6   0  -1 0.22494 0.92355   2
  -6   0  -1 0.02666 0.31460   6
   6   0   1 -0.0954 0.56344   2
   6   0   1 -0.3641 0.30800   7
  -6   0  -1 -0.3531 0.28376   8
   6   0   1 -0.5181 0.25671   6
   6   0   1 -0.0898 0.22288   3
  -6   0  -1 0.22816 0.27238   3
  -8   0  -1 0.28253 0.38295   9
   8   0   1 -0.3627 0.33155   7
  -8   0  -1 -0.0972 0.33080   4
  -8   0  -1 -0.2143 0.37494   6
   8   0   1 -0.1220 0.30777   3
  -8   0  -1 0.62812 0.65971   2
   8   0   1 0.23427 0.43030   9
   8   0   1 -0.2646 0.39897   8
   8   0   1 0.83203 0.40268   6
  -8   0  -1 0.94706 0.90432   2
   8   0   1 0.30903 0.80949   2
  -8   0  -1 -0.2828 0.32198   3
   8   0   1 -0.0267 0.43073   4
  -8   0  -1 0.32477 0.37140   8
  -8   0  -1 0.28145 0.38534   7
   8   0   1 1.05363 1.09875   2
 -10   0  -1 -0.5594 0.49195   6
 -10   0  -1 0.12992 0.48106   4
  10   0   1 0.06311 0.50032   4
  10   0   1 -0.3347 0.97072   2
 -10   0  -1 -0.2987 0.44237   9
 -10   0  -1 0.63419 0.44054   3
  10   0   1 -0.0078 0.40029   6
 -10   0  -1 -0.3257 0.48217   7
 -10   0  -1 0.19456 0.49812   8
  10   0   1 0.29980 0.43489   7
  10   0   1 0.35592 0.39717   3
 -10   0  -1 0.23541 0.85085   2
 -10   0  -1 0.13243 1.06248   2
  10   0   1 0.01368 0.51241   9
  10   0   1 1.26654 0.56954   8
  10   0   1 1.12938 1.36845   2
 -12   0  -1 -0.0505 0.50212   8
  12   0   1 -0.3401 0.50411   7
  12   0   1 0.37844 0.47282   3
  12   0   1 0.75419 1.13819   2
  12   0   1 0.35661 0.51118   6
 -12   0  -1 0.04389 0.64364   7
  12   0   1 -0.6690 0.54831   9
 -12   0  -1 0.06301 0.50844   4
 -12   0  -1 0.55628 0.58277   9
  12   0   1 0.86275 0.68388   8
  12   0   1 0.02624 0.55937   9
 -12   0  -1 -0.3310 1.63682   2
 -12   0  -1 -0.2077 0.57589   6
  12   0   1 0.64812 0.59528   4
 -12   0  -1 -1.1415 1.26684   2
  12   0   1 -1.6646 1.58676   2
 -12   0  -1 0.40486 0.52434   3
  14   0   1 0.45974 0.65902   9
 -14   0  -1 0.07663 1.10862   2
  14   0   1 0.46759 0.71352   9
  14   0   1 0.36522 2.49840   2
  14   0   1 -0.8377 0.66035   4
  14   0   1 0.07333 0.66245   7
 -14   0  -1 0.95987 0.94618   9
 -14   0  -1 -0.4615 1.58117   2
  14   0   1 -0.3501 0.52671   3
 -14   0  -1 0.14111 0.64124   3
 -14   0  -1 0.42514 0.60619   4
 -14   0  -1 0.05264 0.77704   7
  14   0   1 0.03965 2.19878   2
 -14   0  -1 -0.1252 0.64867   8
  14   0   1 -0.0059 0.58031   6
 -14   0  -1 0.34591 0.68457   6
  14   0   1 1.02840 0.78592   8
 -14   0  -1 -0.1592 0.64794   9
 -16   0  -1 -0.4061 0.91942   7
 -16   0  -1 0.23339 1.45632   2
  16   0   1 -1.7377 2.91031   2
 -16   0  -1 1.02091 0.85276   6
 -16   0  -1 0.43765 1.91459   2
  16   0   1 0.68350 0.93688   8
 -16   0  -1 0.78872 0.77700   4
  16   0   1 -0.6799 0.85874   4
  16   0   1 -0.0493 0.70049   6
  16   0   1 0.53740 0.78420   9
  16   0   1 -0.1742 1.40196   2
 -16   0  -1 0.26722 0.76896   3
 -16   0  -1 0.22843 0.83049   9
  16   0   1 -0.1222 0.62267   3
  16   0   1 -0.5510 0.74523   7
 -16   0  -1 -0.7371 0.74330   9
 -16   0  -1 1.00450 0.74484   8
  18   0   1 0.39374 0.73173   3
 -18   0  -1 -0.8089 0.80415   4
 -18   0  -1 -0.3009 3.08452   2
  18   0   1 0.22986 1.08161   8
 -18   0  -1 -0.9817 0.98021   9
 -18   0  -1 -0.4686 1.71932   2
  18   0   1 0.38121 0.83845   6
 -18   0  -1 -1.2235 1.17017   9
 -18   0  -1 -1.1257 1.03135   6
  18   0   1 -0.1604 0.94925   4
  18   0   1 -0.2868 0.84123   7
 -18   0  -1 1.22666 1.06191   7
  18   0   1 -0.4336 2.14625   2
 -18   0  -1 0.33701 0.85970   8
  18   0   1 1.65433 0.97609   9
  18   0   1 -0.3333 0.88094   9
  20   0   1 -0.8305 2.48013   2
 -20   0  -1 -0.0729 2.05857   2
  20   0   1 -0.6983 1.20197   4
  20   0   1 -0.1221 1.00267   6
 -20   0  -1 0.09281 1.16340   7
  20   0   1 1.60671 1.20477   8
  20   0   1 -1.6216 1.02939   9
  20   0   1 -0.2763 0.78701   3
  20   0   1 -0.3134 2.04453   2
 -20   0  -1 1.21964 1.04407   8
 -20   0  -1 0.34901 2.49128   2
 -20   0  -1 -0.5403 1.04775   3
  20   0   1 0.10355 1.04544   9
 -20   0  -1 -1.3248 0.97477   9
 -20   0  -1 0.24200 0.97321   4
 -20   0  -1 -0.6239 1.12923   9
 -20   0  -1 -0.2752 1.19407   6
  22   0   1 -0.1004 2.26576   2
 -22   0  -1 0.46023 1.13752   9
  22   0   1 0.79109 1.49049   8
  22   0   1 -0.5980 0.84517   3
 -22   0  -1 0.95499 1.40429   7
 -22   0  -1 1.40839 1.17379   8
 -22   0  -1 0.55970 1.33876   6
  22   0   1 0.10548 2.22059   9
  22   0   1 0.61323 1.38879   4
 -22   0  -1 -0.7452 3.07394   2
 -22   0  -1 -0.2628 1.23786   9
  22   0   1 0.43163 1.24105   9
  22   0   1 -1.1408 1.01274   6
 -22   0  -1 0.69092 1.17205   4
 -22   0  -1 -0.4702 2.22714   2
 -22   0  -1 -0.0758 1.20505   3
  22   0   1 -2.0215 2.90779   2
 -24   0  -1 0.15024 1.41044   3
 -24   0  -1 -1.7558 2.40790   2
  24   0   1 -0.8968 1.60363   4
  24   0   1 -0.5889 4.40839   2
  24   0   1 0.53968 1.40373   9
  24   0   1 0.54920 1.80053   8
  24   0   1 -0.5498 1.34725   9
 -24   0  -1 -0.1044 1.20953   8
 -24   0  -1 -1.6039 3.85990   2
 -24   0  -1 1.42876 1.50942   6
  24   0   1 0.52506 1.01635   3
  24   0   1 0.61294 1.13345   6
 -24   0  -1 0.91818 1.17351   4
  24   0   1 4.09755 3.27365   2
 -24   0  -1 1.54872 1.70753   7
  26   0   1 -0.9250 1.50396   9
 -26   0  -1 -0.4632 1.70019   6
 -26   0  -1 -0.7092 1.32011   4
  26   0   1 0.23446 2.01948   8
  26   0   1 1.88417 1.15280   3
 -26   0  -1 0.10591 1.45220   8
  26   0   1 2.69778 2.95383   2
  26   0   1 -1.8644 3.90129   2
 -26   0  -1 -2.2725 2.51896   2
  26   0   1 -0.6331 1.53624   9
 -26   0  -1 2.40758 4.50904   2
 -26   0  -1 -0.7269 1.43759   9
  26   0   1 3.62980 3.46301   4
 -26   0  -1 0.12736 1.64020   9
 -26   0  -1 -0.3658 2.00086   7
  26   0   1 0.18868 1.28774   6
  28   0   1 -0.9988 1.51868   6
 -28   0  -1 1.73431 1.57755   4
  28   0   1 -1.4673 3.46659   2
 -28   0  -1 -1.6807 1.44928   8
  28   0   1 -1.7095 4.67583   2
 -28   0  -1 4.15551 5.24140   2
  28   0   1 -0.4024 1.76527   9
 -28   0  -1 1.43271 1.85727   9
 -28   0  -1 0.33711 1.57621   9
  28   0   1 -0.6223 2.08439   4
 -28   0  -1 -0.9768 1.99064   6
 -28   0  -1 -0.9726 4.40623   2
  28   0   1 -1.1268 2.30854   8
  28   0   1 -0.1820 1.83087   9
 -28   0  -1 3.42577 2.34141   7
  28   0   1 -0.7168 1.18730   3
  30   0   1 -1.3482 2.55636   4
  30   0   1 1.45554 2.75696   8
 -30   0  -1 0.00632 1.74944   9
  30   0   1 -1.5739 1.90825   9
 -30   0  -1 1.02785 6.18835   2
  30   0   1 0.88434 1.68970   6
  30   0   1 -2.7104 3.55005   2
 -30   0  -1 2.12645 2.50557   6
 -30   0  -1 -0.2959 3.21233   9
  30   0   1 0.12308 2.00821   9
 -30   0  -1 -1.6131 1.55647   4
  30   0   1 0.90715 1.38705   3
 -30   0  -1 1.24745 1.69069   8
 -30   0  -1 -3.2620 2.68846   7
 -30   0  -1 3.31837 3.59622   2
 -32   0  -1 3.66392 3.77940   2
  32   0   1 1.21651 2.17242   9
 -32   0  -1 -1.3093 1.84323   8
  32   0   1 -2.8121 4.06456   2
  32   0   1 -0.2552 1.80821   6
  32   0   1 1.71070 1.52703   3
  32   0   1 1.52810 2.27575   9
 -32   0  -1 -5.8910 7.23294   2
 -32   0  -1 0.03627 2.04867   9
 -32   0  -1 -1.0993 2.31552   9
  32   0   1 -1.6036 6.05524   2
 -32   0  -1 -1.2030 1.80360   4
  34   0   1 5.13368 4.85187   2
  34   0   1 2.59716 2.52208   9
 -34   0  -1 0.91104 2.69967   9
  34   0   1 2.05267 1.71942   3
 -34   0  -1 0.72172 2.18943   8
  34   0   1 1.25833 2.13660   6
 -34   0  -1 0.51557 4.47763   2
 -34   0  -1 -1.8589 1.99913   4
  34   0   1 2.43495 2.64658   9
  34   0   1 -2.1043 6.86866   2
 -34   0  -1 -1.9072 2.25804   9
 -34   0  -1 -5.2921 9.34203   2
  36   0   1 -1.3682 2.34689   6
 -36   0  -1 -0.8238 2.29950   8
 -36   0  -1 1.35770 4.48477   2
  36   0   1 3.65443 4.95569   2
 -36   0  -1 1.60610 3.08760   9
  36   0   1 -1.1917 2.74147   9
 -36   0  -1 -0.8987 2.58716   9
  36   0   1 -0.0110 1.87594   3
  36   0   1 -1.2104 2.86767   9
 -36   0  -1 -0.6685 2.21892   4
 -38   0  -1 -0.7312 2.93780   9
 -38   0  -1 0.23093 5.47025   2
 -38   0  -1 -0.3266 3.48469   9
 -38   0  -1 -1.8742 2.69620   8
  38   0   1 -2.8847 2.02791   3
  38   0   1 2.66330 2.64432   6
  38   0   1 -2.7688 3.08867   9
  38   0   1 -1.2291 3.26794   9
  38   0   1 2.06731 11.3359   2
 -40   0  -1 -0.1537 3.87771   9
  40   0   1 -0.8734 6.45649   2
  40   0   1 1.10788 3.01846   6
 -40   0  -1 3.67166 6.43663   2
  40   0   1 0.54536 3.69546   9
  40   0   1 -1.4359 2.30468   3
  40   0   1 -1.4177 3.77202   9
 -40   0  -1 -0.3609 2.99930   8
 -40   0  -1 -0.2537 3.37126   9
 -42   0  -1 -2.9391 4.51228   9
 -42   0  -1 -7.9317 6.63001   2
  42   0   1 -4.2752 7.46784   2
  42   0   1 -0.0058 4.57091   9
  42   0   1 0.17194 4.10981   9
 -42   0  -1 -1.3623 3.82713   9
 -42   0  -1 -2.6854 3.16662   8
  42   0   1 -1.8306 2.61262   3
  42   0   1 -2.4851 3.31441   6
 -44   0  -1 1.99356 5.13966   9
  44   0   1 -3.4080 8.68391   2
 -44   0  -1 -7.9981 9.67339   2
 -44   0  -1 -5.1132 3.71141   8
  44   0   1 1.04987 4.85660   9
  44   0   1 -1.8631 3.59850   6
  44   0   1 0.59473 2.92915   3
  44   0   1 -2.7393 4.59030   9
 -44   0  -1 -5.2779 5.39840   9
  46   0   1 1.64949 5.43415   9
  46   0   1 -4.1599 7.49166   9
 -46   0  -1 -5.4897 5.85650   9
  46   0   1 -0.2752 3.33492   3
 -46   0  -1 0.89814 4.30499   8
  46   0   1 0.25140 4.31190   6
 -46   0  -1 0.23114 4.84036   9
  46   0   1 4.08299 9.44952   2
 -46   0  -1 -2.7979 8.21468   2
  48   0   1 8.03492 11.9218   2
 -48   0  -1 3.93405 10.4827   2
 -48   0  -1 4.82908 6.69908   9
 -48   0  -1 1.00727 5.45757   9
 -48   0  -1 -0.1929 4.65558   8
  48   0   1 -0.9826 6.23930   9
  48   0   1 -0.0220 3.69266   3
  48   0   1 -4.3148 6.11121   9
  48   0   1 -0.7660 4.77725   6
 -50   0  -1 6.51543 12.1149   2
  50   0   1 -0.2332 7.09730   9
 -50   0  -1 -0.1018 6.26385   9
 -50   0  -1 2.83148 7.98588   9
 -50   0  -1 -0.1772 5.36771   8
  50   0   1 -0.7087 4.10763   3
  50   0   1 -0.8037 7.11395   9
  50   0   1 -2.4535 5.49415   6
  50   0   1 -1.9676 12.7628   2
  52   0   1 12.6102 21.0021   2
  52   0   1 2.68883 8.24330   9
  52   0   1 0.21400 6.21990   6
 -52   0  -1 -1.2157 6.24605   8
 -52   0  -1 6.12831 9.08928   9
 -52   0  -1 -3.8109 12.7077   2
  52   0   1 6.55628 4.78403   3
  52   0   1 2.00718 7.90531   9
 -52   0  -1 -0.2666 7.25010   9
  53  -1  -1 155.363 15.4853   9
  53  -1  -1 186.763 27.8449   2
  53  -1  -1 167.591 13.7371   6
  53  -1  -1 148.697 11.0417   3
 -53  -1   1 115.771 13.9437   9
 -53  -1   1 128.059 36.7982   2
 -53  -1   1 175.920 13.2299   8
 -53   1   1 158.151 25.4079   2
  53   1  -1 143.038 17.3723   9
  53   1  -1 156.874 11.0717   3
 -53   1   1 143.358 12.7837   8
 -53   1   1 130.886 15.5300   9
  53   1  -1 154.361 29.6636   2
  53   1  -1 146.403 13.2158   6
  51  -1  -1 8.00489 5.53108   6
 -51  -1   1 0.42687 7.20249   9
  51  -1  -1 -2.3050 12.4401   2
  51  -1  -1 10.8541 4.40163   3
  51  -1  -1 9.70271 6.79529   9
 -51  -1   1 7.96161 5.99169   9
  51  -1  -1 0.87486 6.38617   9
 -51  -1   1 7.67071 5.70866   8
 -51  -1   1 0.86586 10.9099   2
 -51   1   1 3.63432 8.52177   9
 -51   1   1 2.12295 6.34433   9
  51   1  -1 8.06886 4.38558   3
  51   1  -1 11.9365 5.60235   6
  51   1  -1 4.87396 7.05928   9
  51   1  -1 7.71843 13.6082   2
  51   1  -1 7.05371 7.55725   9
 -51   1   1 7.13662 11.5725   2
 -51   1   1 17.9964 5.57359   8
  49  -1  -1 57.3628 9.20489   6
 -49  -1   1 39.7394 6.22491   9
 -49  -1   1 50.8307 10.9982   2
  49  -1  -1 54.4721 11.1308   9
 -49  -1   1 53.6403 8.64653   8
  49  -1  -1 45.6381 6.83140   3
  49  -1  -1 49.2109 12.1835   2
  49   1  -1 78.8749 21.4756   2
 -49   1   1 49.3243 10.8447   9
  49   1  -1 52.9772 9.13617   6
  49   1  -1 60.3140 12.6113   9
 -49   1   1 67.6822 8.63311   8
 -49   1   1 41.2676 11.0225   2
 -47  -1   1 2.17660 8.03644   2
  47  -1  -1 3.49183 3.20157   3
  47  -1  -1 3.25908 5.12567   9
  47  -1  -1 -5.3384 9.36218   2
 -47  -1   1 1.88821 4.32259   8
  47  -1  -1 2.82437 4.89799   9
 -47  -1   1 5.79160 4.70879   9
  47  -1  -1 0.75988 4.21717   6
 -47  -1   1 0.15136 5.49521   9
  47   1  -1 0.90716 4.16324   6
 -47   1   1 2.69035 5.87709   9
  47   1  -1 1.90874 5.17652   9
 -47   1   1 3.42531 8.91357   2
 -47   1   1 6.06696 5.08557   9
  47   1  -1 3.81979 6.89416   9
 -47   1   1 2.52315 4.04290   8
  47   1  -1 -2.2129 9.22983   2
  47   1  -1 2.82092 3.62660   3
  45  -1  -1 19.9432 8.49214   2
 -45  -1   1 19.2118 5.36141   9
 -45  -1   1 17.5865 4.47058   9
  45  -1  -1 19.2350 4.77575   9
  45  -1  -1 22.6876 5.10316   3
 -45  -1   1 8.26896 7.70014   2
  45  -1  -1 19.4468 4.97017   9
 -45  -1   1 32.0200 6.55679   8
  45  -1  -1 15.5492 4.13627   6
  45   1  -1 24.7441 5.43951   9
  45   1  -1 24.9032 9.61449   2
 -45   1   1 30.0874 6.46535   8
 -45   1   1 19.5583 4.69470   9
 -45   1   1 16.0340 7.35172   2
  45   1  -1 20.5191 3.41463   3
  45   1  -1 20.5265 4.13111   6
 -43  -1   1 3.98018 4.29872   9
 -43  -1   1 6.82012 3.79297   9
  43  -1  -1 -5.7021 9.92716   2
  43  -1  -1 2.49517 2.56774   3
  43  -1  -1 4.65044 3.85097   9
  43  -1  -1 0.02213 3.37235   6
 -43  -1   1 2.68401 3.26997   8
  43  -1  -1 -3.7646 3.97093   9
 -43  -1   1 1.85934 6.89046   2
  43   1  -1 2.85307 4.38664   9
  43   1  -1 4.09465 2.72023   3
  43   1  -1 6.58871 3.41323   6
 -43   1   1 5.62927 4.52789   9
  43   1  -1 2.75446 9.69393   2
  43   1  -1 5.57208 4.04796   9
 -43   1   1 4.01564 3.34948   8
 -43   1   1 3.46764 3.89894   9
  41  -1  -1 72.7662 7.18969   9
 -41  -1   1 74.3933 6.36724   8
 -41  -1   1 77.3663 11.2175   2
 -41  -1   1 70.1396 6.97035   9
 -41  -1   1 66.8363 7.90876   9
  41  -1  -1 57.0083 5.16052   3
  41  -1  -1 52.2426 12.8740   2
  41  -1  -1 69.0543 6.54256   6
 -41   1   1 69.6837 11.5313   2
  41   1  -1 68.3078 8.28881   9
 -41   1   1 59.1233 7.29745   9
 -41   1   1 64.2425 8.07430   9
  41   1  -1 53.4993 13.6013   2
  41   1  -1 70.8343 7.53251   9
 -41   1   1 62.0576 6.15349   8
  41   1  -1 69.1731 5.45804   3
  41   1  -1 70.1133 6.41520   6
  39  -1  -1 45.1818 10.5395   2
  39  -1  -1 51.9777 5.52872   6
  39  -1  -1 49.0770 4.37139   3
 -39  -1   1 41.6654 5.89837   9
  39  -1  -1 49.3857 6.67723   9
  39  -1  -1 44.3453 11.2633   2
 -39  -1   1 42.9225 6.51363   9
 -39  -1   1 61.9480 10.0158   2
  39  -1  -1 56.7874 6.17938   9
 -39  -1   1 50.6368 5.35525   8
 -39   1   1 33.7217 6.91715   9
  39   1  -1 43.9915 5.39000   6
 -39   1   1 53.4468 10.0698   2
 -39   1   1 50.9675 5.28561   8
  39   1  -1 64.5032 17.5688   2
  39   1  -1 47.3494 7.03256   9
  39   1  -1 36.4155 4.45817   3
 -39   1   1 46.2365 6.19555   9
  39   1  -1 49.6212 6.44121   9
  37  -1  -1 10.3449 3.08351   9
 -37  -1   1 21.6810 4.83801   9
 -37  -1   1 12.3260 2.75161   8
  37  -1  -1 16.7229 3.33035   3
  37  -1  -1 13.6768 2.78219   6
  37  -1  -1 19.1762 8.37402   2
 -37  -1   1 14.9121 8.54134   2
 -37  -1   1 8.13229 9.17004   2
  37  -1  -1 12.3841 2.95848   9
  37  -1  -1 4.02751 6.19947   2
 -37  -1   1 12.7605 3.08198   9
  37   1  -1 12.8995 3.32120   9
 -37   1   1 20.7067 4.10004   8
  37   1  -1 16.7757 3.48834   3
  37   1  -1 16.0977 4.23914   6
 -37   1   1 10.0185 2.83382   9
  37   1  -1 9.50763 2.99243   9
  37   1  -1 5.09521 5.17811   2
 -37   1   1 9.70383 5.06238   2
 -37   1   1 9.05076 3.98048   9
  35  -1  -1 61.7529 4.05175   3
  35  -1  -1 48.2337 5.19930   9
 -35  -1   1 59.6875 4.78894   8
 -35  -1   1 55.7033 5.52438   9
  35  -1  -1 51.6070 5.69693   9
  35  -1  -1 47.3539 4.81822   6
 -35  -1   1 53.1219 5.09148   9
 -35  -1   1 67.7289 8.31204   2
  35  -1  -1 33.4740 7.82529   2
 -35  -1   1 41.6169 9.15063   2
  35  -1  -1 42.7471 9.10735   2
 -35   1   1 62.7486 8.52600   2
 -35   1   1 49.7229 5.77766   9
  35   1  -1 48.3487 4.72549   6
  35   1  -1 63.6309 4.23417   3
 -35   1   1 48.0145 4.57806   8
 -35   1   1 57.7929 5.72856   3
 -35   1   1 61.2350 4.74997   4
 -35   1   1 61.8480 5.32827   9
  35   1  -1 49.9275 5.90724   9
  35   1  -1 49.1417 9.48925   2
 -33  -1   1 59.0496 12.9787   2
  33  -1  -1 79.4414 10.8421   2
  33  -1  -1 82.1356 5.39412   6
  33  -1  -1 93.3800 5.72950   9
 -33  -1   1 78.1809 6.26716   3
  33  -1  -1 84.5302 9.02273   2
 -33  -1   1 93.4484 7.02682   7
 -33  -1   1 74.7363 8.23293   2
  33  -1  -1 81.5226 4.76700   3
 -33  -1   1 80.6173 5.88738   9
 -33  -1   1 83.2762 5.41439   8
 -33  -1   1 87.1195 5.63534   9
  33  -1  -1 87.1731 6.11854   9
 -33   1   1 87.6876 8.40921   2
  33   1  -1 73.3548 5.77877   9
 -33   1   1 77.3292 5.29707   8
  33   1  -1 84.7963 6.16765   9
 -33   1   1 73.0465 5.65906   9
 -33   1   1 68.4295 15.4695   2
  33   1  -1 70.9057 11.0424   2
 -33   1   1 79.5385 5.87339   3
 -33   1   1 78.8880 5.30531   4
  33   1  -1 87.7546 4.93534   3
  33   1  -1 85.8360 9.26109   2
  33   1  -1 92.9893 5.41901   6
 -33   1   1 84.0723 7.39054   9
 -31  -1   1 29.1824 4.54553   6
  31  -1  -1 29.8224 4.20539   9
  31  -1  -1 25.4987 4.63363   8
  31  -1  -1 31.4654 8.24115   2
 -31  -1   1 15.6354 5.82681   2
 -31  -1   1 22.5758 3.99565   9
  31  -1  -1 27.1756 6.96490   2
  31  -1  -1 20.2120 3.74206   9
 -31  -1   1 27.4978 6.17722   2
  31  -1  -1 20.0825 4.37020   4
 -31  -1   1 18.8562 3.61853   9
 -31  -1   1 29.6893 3.38459   8
  31  -1  -1 22.7711 4.31247   3
 -31  -1   1 28.9821 4.69083   7
  31  -1  -1 30.7062 3.44534   6
 -31  -1   1 21.4454 4.29598   3
 -31   1   1 22.6831 3.28430   8
  31   1  -1 34.7268 4.72628   4
 -31   1   1 31.2821 6.44841   2
  31   1  -1 29.0090 2.88584   3
 -31   1   1 23.3715 4.77054   7
  31   1  -1 20.9246 4.09736   9
  31   1  -1 25.5883 3.38611   6
 -31   1   1 27.8311 3.30932   4
  31   1  -1 20.6169 5.85541   2
 -31   1   1 27.2442 4.62167   6
 -31   1   1 26.3895 6.04986   2
  31   1  -1 25.1612 5.22017   9
  31   1  -1 23.3407 4.78381   8
 -31   1   1 31.5059 3.96493   3
 -31   1   1 20.8201 4.11328   9
 -31   1   1 21.6863 4.17960   9
  31   1  -1 13.9616 4.26758   2
 -29  -1   1 26.0497 3.27332   9
 -29  -1   1 24.8758 3.80488   3
 -29  -1   1 17.1745 5.32131   2
 -29  -1   1 31.0336 5.68422   2
  29  -1  -1 19.5586 3.86198   4
  29  -1  -1 21.6334 4.20787   8
 -29  -1   1 24.3504 3.00468   8
 -29  -1   1 18.9577 3.64430   9
  29  -1  -1 24.3458 6.73164   2
  29  -1  -1 26.7999 2.44308   3
  29  -1  -1 47.8846 9.42819   2
 -29  -1   1 23.9532 4.49649   6
  29  -1  -1 27.9262 3.71706   9
  29  -1  -1 20.7895 3.36524   9
 -29  -1   1 22.4464 4.35606   7
  29  -1  -1 26.3178 3.14859   6
  29   1  -1 24.1136 4.08634   8
 -29   1   1 19.9573 5.69100   2
  29   1  -1 26.9624 3.70231   9
 -29   1   1 23.9955 3.80925   9
 -29   1   1 19.6387 2.90679   8
 -29   1   1 25.5550 5.60967   2
 -29   1   1 29.2090 3.06974   4
 -29   1   1 26.0948 3.33775   9
  29   1  -1 22.9173 3.02350   6
  29   1  -1 23.7527 6.46594   2
 -29   1   1 26.0718 3.44642   3
  29   1  -1 25.5998 4.08637   4
  29   1  -1 21.6177 3.48789   9
 -29   1   1 20.0068 4.13453   7
  29   1  -1 24.4706 2.63175   3
 -29   1   1 26.6114 4.00096   6
  27  -1  -1 5.53786 1.87497   8
  27  -1  -1 4.64998 1.15308   3
 -27  -1   1 5.78442 1.87959   7
 -27  -1   1 4.40910 1.94858   6
 -27  -1   1 1.41087 2.44056   2
  27  -1  -1 6.71699 1.57160   6
 -27  -1   1 5.92470 4.37329   2
 -27  -1   1 3.78922 1.83804   3
  27  -1  -1 2.96569 3.61726   2
  27  -1  -1 -2.4183 2.68747   2
 -27  -1   1 3.40790 1.44318   9
  27  -1  -1 10.3696 3.04330   9
  27  -1  -1 2.98226 1.51244   9
 -27  -1   1 5.03038 1.70159   9
 -27  -1   1 7.01478 1.63940   8
  27  -1  -1 7.89236 1.93289   4
 -27   1   1 4.08414 1.43333   8
 -27   1   1 7.06535 2.82197   2
  27   1  -1 3.31847 1.83467   4
  27   1  -1 3.12790 1.19583   3
 -27   1   1 6.70578 1.65577   3
  27   1  -1 2.92935 2.77930   2
 -27   1   1 1.82786 4.50278   2
  27   1  -1 0.66670 3.50116   2
  27   1  -1 5.39500 1.64918   9
 -27   1   1 2.86832 1.92053   7
 -27   1   1 2.40647 1.91912   6
  27   1  -1 3.95834 1.47876   6
 -27   1   1 5.20451 1.47710   4
  27   1  -1 4.18522 1.71002   9
  27   1  -1 5.22635 1.96559   8
  25  -1  -1 3.74844 1.45817   9
 -25  -1   1 4.03882 2.50632   2
  25  -1  -1 7.21492 1.74569   8
 -25  -1   1 4.84899 1.28632   8
 -25  -1   1 6.67270 1.68027   6
  25  -1  -1 2.59455 2.59747   2
  25  -1  -1 5.22734 1.61090   4
  25  -1  -1 5.37386 1.39305   6
 -25  -1   1 1.78795 3.61900   2
 -25  -1   1 5.63030 1.32219   9
  25  -1  -1 4.53186 1.06985   3
  25  -1  -1 2.88490 1.33134   9
 -25  -1   1 4.92511 1.59975   3
 -25  -1   1 2.43517 1.68088   7
 -25  -1   1 3.50174 1.44078   9
  25  -1  -1 1.95618 3.10612   2
  25   1  -1 4.02736 2.34420   6
 -25   1   1 6.96503 3.96642   2
  25   1  -1 6.81940 1.84804   3
  25   1  -1 6.52077 1.74977   4
  25   1  -1 3.96967 1.65284   8
  25   1  -1 4.43317 3.67036   2
  25   1  -1 3.27688 2.21546   9
 -25   1   1 4.81849 1.41275   9
 -25   1   1 3.95985 1.38292   3
  25   1  -1 4.13320 2.41597   9
 -25   1   1 1.40208 2.51385   2
 -25   1   1 3.77268 1.18491   4
  25   1  -1 2.33217 2.63830   2
 -25   1   1 5.14520 1.81095   7
 -25   1   1 4.78006 1.62962   6
 -23  -1   1 464.678 20.4754   7
 -23  -1   1 454.701 20.4928   8
  23  -1  -1 462.926 20.5453   9
  23  -1  -1 450.864 21.3322   2
 -23  -1   1 466.598 20.4762   4
  23  -1  -1 457.331 20.2458   3
  23  -1  -1 458.589 20.5153   8
 -23  -1   1 477.978 20.4840   6
 -23  -1   1 465.358 21.4795   9
  23  -1  -1 463.287 21.4673   2
  23  -1  -1 473.181 20.4580   9
  23  -1  -1 463.575 20.4857   6
 -23  -1   1 473.114 20.4421   9
 -23  -1   1 468.535 20.4742   3
  23  -1  -1 445.629 20.4624   4
 -23  -1   1 485.791 21.9087   2
 -23   1   1 476.517 20.5317   7
  23   1  -1 434.369 21.6060   2
  23   1  -1 457.447 20.5411   8
  23   1  -1 471.735 20.5571   9
 -23   1   1 479.673 20.4675   9
 -23   1   1 477.729 20.4515   4
 -23   1   1 427.932 21.3507   2
  23   1  -1 463.837 20.4346   6
 -23   1   1 455.261 20.4399   8
  23   1  -1 454.537 20.4900   4
 -23   1   1 465.023 20.3480   3
 -23   1   1 478.762 20.5144   6
  23   1  -1 459.065 20.3380   3
 -21  -1   1 234.755 10.5404   7
 -21  -1   1 229.360 10.5098   4
 -21  -1   1 229.764 10.5244   3
 -21  -1   1 240.317 10.5627   8
 -21  -1   1 233.889 10.5804   9
  21  -1  -1 232.193 11.4931   2
  21  -1  -1 223.241 10.7015   9
  21  -1  -1 234.045 10.5880   8
 -21  -1   1 229.732 10.4950   9
  21  -1  -1 227.865 10.6101   9
 -21  -1   1 217.170 11.2984   2
  21  -1  -1 233.073 11.5801   2
  21  -1  -1 228.604 10.3006   3
  21  -1  -1 231.084 10.5299   6
 -21  -1   1 230.841 10.5313   6
  21  -1  -1 227.457 10.5353   4
 -21   1   1 242.835 12.1901   2
 -21   1   1 210.366 10.5631   9
 -21   1   1 240.624 10.4206   3
 -21   1   1 245.696 10.5048   4
 -21   1   1 221.037 11.3306   2
  21   1  -1 234.712 10.4045   3
 -21   1   1 223.810 10.5001   9
  21   1  -1 245.255 10.5837   4
  21   1  -1 238.923 10.4893   6
  21   1  -1 220.025 10.5900   8
  21   1  -1 233.766 10.6136   9
 -21   1   1 236.494 10.5014   8
 -21   1   1 225.896 10.5522   6
  21   1  -1 232.649 11.6318   2
 -21   1   1 236.579 10.5876   7
 -19  -1   1 49.6380 3.00012   7
  19  -1  -1 53.2862 4.23613   2
  19  -1  -1 47.2853 2.89193   6
 -19  -1   1 49.8208 2.96715   3
  19  -1  -1 52.0851 2.97065   9
 -19  -1   1 53.7147 3.07763   9
  19  -1  -1 53.2380 4.29769   2
  19  -1  -1 49.5859 3.09170   9
  19  -1  -1 43.9183 2.58130   3
 -19  -1   1 55.6872 3.00859   6
 -19  -1   1 45.3526 2.88465   8
 -19  -1   1 49.8352 3.98357   2
  19  -1  -1 44.3378 2.99097   8
  19  -1  -1 50.3543 3.02019   4
 -19  -1   1 63.9407 6.78648   2
 -19  -1   1 47.5475 2.89353   9
 -19   1   1 52.3063 2.84921   8
  19   1  -1 39.6535 4.10091   2
 -19   1   1 67.7912 7.06876   2
 -19   1   1 43.7617 3.06701   7
 -19   1   1 52.8524 2.95144   9
 -19   1   1 50.3986 2.82055   4
 -19   1   1 46.5001 2.99384   6
 -19   1   1 43.8007 2.75164   3
  19   1  -1 46.7624 2.73419   3
 -19   1   1 50.2247 3.12547   9
  19   1  -1 50.5379 3.02698   4
 -19   1   1 45.9725 4.05355   2
  19   1  -1 51.2994 2.82719   6
  19   1  -1 46.0873 3.05158   9
  19   1  -1 52.9827 3.09678   8
 -17  -1   1 292.753 13.6984   8
  17  -1  -1 314.236 13.7498   9
 -17  -1   1 309.962 13.6662   6
  17  -1  -1 303.490 13.7046   6
 -17  -1   1 307.840 13.8750   3
  17  -1  -1 308.351 14.3124   2
 -17  -1   1 317.682 14.6061   2
 -17  -1   1 308.418 13.6648   7
  17  -1  -1 303.629 13.5295   3
  17  -1  -1 321.260 13.6986   4
 -17  -1   1 321.718 13.7254   9
 -17  -1   1 305.329 13.6894   4
  17  -1  -1 307.385 13.6994   8
 -17  -1   1 273.521 14.7504   2
  17  -1  -1 317.543 13.6772   9
  17  -1  -1 306.351 14.3747   2
  17   1  -1 317.478 14.4310   2
  17   1  -1 311.355 13.6558   6
 -17   1   1 308.521 13.6663   8
  17   1  -1 299.250 13.6816   4
 -17   1   1 317.607 14.6484   2
  17   1  -1 315.426 13.7437   8
  17   1  -1 315.449 13.7437   9
 -17   1   1 305.098 13.6983   6
 -17   1   1 312.863 13.6749   9
 -17   1   1 319.684 14.2712   2
 -17   1   1 303.341 13.7266   9
  17   1  -1 309.132 13.6788   9
  17   1  -1 309.109 13.6200   3
 -17   1   1 311.741 13.7087   7
 -17   1   1 316.152 13.5828   3
  17   1  -1 308.221 14.3217   2
 -17   1   1 305.173 13.6466   4
  15  -1  -1 129.560 5.93085   3
  15  -1  -1 133.740 6.11125   6
  15  -1  -1 132.027 6.10100   8
 -15  -1   1 133.962 6.07297   7
 -15  -1   1 136.194 6.10078   3
 -15  -1   1 138.355 6.08482   6
 -15  -1   1 128.956 6.06430   9
  15  -1  -1 127.962 6.06892   9
 -15  -1   1 136.878 7.06472   2
  15  -1  -1 137.522 6.09478   4
 -15  -1   1 131.259 6.11107   8
  15  -1  -1 144.730 6.89223   2
 -15  -1   1 137.003 6.13410   9
 -15  -1   1 126.376 6.07666   4
 -15   1   1 141.501 6.73225   2
  15   1  -1 132.378 6.05362   7
  15   1  -1 129.310 6.10403   4
 -15   1   1 127.364 6.33856   7
 -15   1   1 129.188 7.06043   2
  15   1  -1 121.463 6.00386   3
 -15   1   1 130.146 6.14404   6
  15   1  -1 130.540 6.15304   8
 -15   1   1 135.501 6.09138   9
  15   1  -1 134.457 6.86065   2
 -15   1   1 127.517 6.03975   4
  15   1  -1 130.016 6.09153   9
 -15   1   1 133.722 5.97858   3
  15   1  -1 134.354 6.15139   9
 -15   1   1 138.782 6.16407   9
 -15   1   1 126.928 6.04448   8
  15   1  -1 124.701 6.02617   6
  13  -1  -1 4.41767 1.07560   4
 -13  -1   1 6.37526 1.03719   8
 -13  -1   1 6.20002 1.07524   3
  13  -1  -1 7.23889 1.07774   9
  13  -1  -1 8.41230 0.81891   3
  13  -1  -1 4.54928 1.32590   2
  13  -1  -1 7.64710 2.11775   2
 -13  -1   1 6.27600 1.07325   6
 -13  -1   1 11.4956 3.24133   2
 -13  -1   1 8.03686 1.04796   9
 -13  -1   1 7.18436 2.10899   2
  13  -1  -1 6.66473 1.17254   9
 -13  -1   1 7.15822 1.02899   4
  13  -1  -1 6.15337 1.08862   6
 -13  -1   1 8.29053 1.20428   9
 -13  -1   1 5.90974 1.10175   7
  13  -1  -1 7.25822 1.10602   8
 -13   1   1 6.66988 1.14604   6
  13   1  -1 6.72880 1.20216   9
 -13   1   1 6.79048 1.25902   9
 -13   1   1 8.70916 0.92109   3
 -13   1   1 7.91746 0.99641   8
 -13   1   1 5.02687 0.95542   4
  13   1  -1 9.02459 1.16875   4
  13   1  -1 5.56018 1.09341   8
  13   1  -1 7.09424 2.19951   2
  13   1  -1 6.35921 1.16007   9
 -13   1   1 7.05090 1.55406   2
 -13   1   1 9.52855 1.93543   2
  13   1  -1 6.64952 0.97382   6
 -13   1   1 6.35258 1.09177   9
 -13   1   1 4.80273 1.15465   7
  13   1  -1 6.53829 0.94890   3
  13   1  -1 4.72818 1.35126   2
  13   1  -1 5.36098 0.99974   7
  11  -1  -1 68.1531 3.32944   8
 -11  -1   1 71.6700 3.32272   7
 -11  -1   1 68.7253 3.34802   3
  11  -1  -1 66.0709 3.35440   6
 -11  -1   1 69.5592 3.36580   8
 -11  -1   1 70.7982 3.32434   9
  11  -1  -1 74.9616 3.23058   3
  11  -1  -1 67.6812 3.37935   9
  11  -1  -1 74.0344 3.33733   9
 -11  -1   1 67.9153 3.30905   6
 -11  -1   1 68.1281 3.53929   9
  11  -1  -1 66.6126 3.81600   2
  11  -1  -1 69.4751 3.32764   4
 -11  -1   1 83.3123 4.14076   2
  11   1  -1 69.6175 3.87444   2
  11   1  -1 67.7725 3.31114   3
  11   1  -1 66.6758 3.29648   7
  11   1  -1 67.4156 3.33178   9
 -11   1   1 67.4084 3.36499   7
  11   1  -1 69.2265 3.37936   8
 -11   1   1 73.3159 3.35553   9
  11   1  -1 75.1257 3.37399   4
 -11   1   1 76.9175 4.11423   2
  11   1  -1 74.1758 3.40057   9
 -11   1   1 72.7965 3.37635   6
 -11   1   1 74.1773 3.32460   8
 -11   1   1 70.9711 3.80481   2
  11   1  -1 73.0033 3.96088   2
  11   1  -1 66.6788 3.29113   6
 -11   1   1 68.2133 3.31057   4
 -11   1   1 70.1834 3.24233   3
 -11   1   1 71.6566 3.39496   9
  -9  -1   1 58.3537 2.54278   9
  -9  -1   1 51.8197 2.51110   7
   9  -1  -1 49.4476 2.51112   4
   9  -1  -1 54.5488 2.53184   8
   9  -1  -1 57.7227 3.03067   2
   9  -1  -1 55.5234 2.55909   9
  -9  -1   1 54.8202 3.06647   2
  -9  -1   1 53.1861 2.51021   6
  -9  -1   1 49.4365 2.55161   3
  -9  -1   1 51.5872 2.55618   8
   9  -1  -1 52.5383 2.52730   3
   9  -1  -1 55.9630 2.59704   9
  -9  -1   1 55.5500 2.92548   2
  -9   1   1 48.8884 2.49731   8
  -9   1   1 53.6857 2.51103   4
   9   1  -1 56.9884 2.54902   9
   9   1  -1 49.9080 2.51700   3
  -9   1   1 50.8008 2.56047   6
   9   1  -1 51.3517 2.56720   8
  -9   1   1 53.8355 2.45162   3
  -9   1   1 55.6198 2.58285   9
  -9   1   1 44.4432 4.09406   2
   9   1  -1 51.0128 2.49560   7
   9   1  -1 40.8820 3.67261   2
   9   1  -1 57.5332 3.05031   2
  -9   1   1 57.7905 2.93095   2
   9   1  -1 57.4152 2.59890   9
   9   1  -1 53.3858 2.50236   6
   9   1  -1 49.9434 2.54728   4
  -7  -1   1 442.420 18.9473   2
   7  -1  -1 422.781 18.7026   3
   7  -1  -1 457.501 18.7537   8
  -7  -1   1 417.846 18.7866   8
  -7  -1   1 437.448 18.7370   6
   7  -1  -1 461.007 18.9540   2
   7  -1  -1 438.032 18.9861   2
  -7  -1   1 421.298 18.7315   7
  -7  -1   1 428.331 18.7491   9
  -7  -1   1 447.657 19.0008   2
   7  -1  -1 410.685 18.7808   6
   7  -1  -1 438.645 18.7802   9
  -7  -1   1 417.130 18.7717   3
   7  -1  -1 443.383 18.7474   4
   7  -1  -1 386.441 18.8860   9
  -7   1   1 433.473 18.7826   6
  -7   1   1 440.968 18.7075   3
  -7   1   1 461.061 18.7577   9
  -7   1   1 439.817 18.7811   9
   7   1  -1 425.370 18.7335   6
   7   1  -1 465.488 18.9664   2
  -7   1   1 431.383 18.7429   8
   7   1  -1 425.465 18.7750   4
   7   1  -1 451.231 18.7607   9
  -7   1   1 446.863 18.9496   2
   7   1  -1 420.315 18.7647   9
  -7   1   1 426.320 18.8192   4
   7   1  -1 434.879 18.9919   2
  -7   1   1 453.394 19.0026   2
   7   1  -1 430.351 18.7685   3
   7   1  -1 422.110 18.7321   7
   7   1  -1 426.409 18.7866   8
   5  -1  -1 763.734 33.8728   8
  -5  -1   1 807.669 33.9194   3
  -5  -1   1 769.471 33.8649   7
  -5  -1   1 782.234 33.8676   6
   5  -1  -1 788.811 33.9021   3
  -5  -1   1 788.045 34.0205   2
  -5  -1   1 776.650 33.9552   9
   5  -1  -1 803.758 33.8790   4
   5  -1  -1 769.902 33.9253   6
   5  -1  -1 792.069 34.0416   2
   5  -1  -1 785.497 33.9084   9
  -5  -1   1 775.211 33.9242   8
  -5  -1   1 753.267 33.8937   9
  -5   1   1 861.286 34.0637   2
   5   1  -1 815.102 33.8986   9
   5   1  -1 826.133 33.8921   9
  -5   1   1 814.081 33.9099   9
  -5   1   1 792.228 33.9230   6
   5   1  -1 820.829 34.0254   2
  -5   1   1 774.371 34.0139   2
  -5   1   1 785.936 33.8763   4
  -5   1   1 789.202 33.8581   3
  -5   1   1 836.155 33.8869   9
  -5   1   1 726.087 33.9176   8
   5   1  -1 726.583 33.9120   6
   3  -1  -1 2409.33 93.6666   5
   3  -1  -1 2425.36 93.6541   3
  -3  -1   1 2031.42 93.6218   6
   3  -1  -1 2083.43 93.7348   2
  -3  -1   1 2175.00 93.6914   8
  -3  -1   1 2149.41 93.6745   3
   3  -1  -1 2432.00 93.7068   6
   3  -1  -1 2067.81 93.6240   8
  -3  -1   1 1899.87 93.6180   7
  -3  -1   1 2111.68 93.7181   2
   3  -1  -1 2137.37 93.6304   4
   3   1  -1 2070.66 93.6216   6
  -3   1   1 2329.57 93.6494   3
  -3   1   1 2528.88 93.6371   4
   3   1  -1 2209.06 93.6401   9
   3   1  -1 2124.69 93.7207   2
  -3   1   1 2059.80 93.6419   9
  -3   1   1 2084.44 93.6237   8
  -3   1   1 2441.87 93.7012   6
  -3   1   1 2042.78 93.7263   2
   3   1  -1 2116.72 93.7408   2
   3   1  -1 1987.52 93.6188   7
  -3   1   1 2109.30 93.7163   2
   3   1  -1 2160.18 93.6912   3
   3   1  -1 2086.53 93.6379   9
  -3   1   1 2505.03 93.6665   5
  -3   1   1 2220.27 93.6338   9
  -1  -1   1 22.4769 1.10508   2
   1  -1  -1 24.4002 1.06617   5
   1  -1  -1 23.1448 1.10813   2
  -1  -1   1 23.2378 1.09555   2
  -1  -1   1 23.0497 1.07742   8
   1  -1  -1 21.6500 1.09173   2
   1  -1  -1 25.4096 1.09703   6
   1   1  -1 21.7576 1.09010   8
  -1   1   1 21.6492 1.11283   2
   1   1  -1 24.8453 1.11630   2
   1   1  -1 21.9065 1.10392   2
  -1   1   1 23.9575 1.10281   2
   1   1  -1 23.9572 1.04108   3
  -1   1   1 21.8544 1.06493   5
  -1   1   1 19.9334 1.11433   6
  -1  -1  -1 3630.71 166.052   8
   1  -1   1 4134.40 166.087   4
   1  -1   1 3978.77 166.054   6
  -1  -1  -1 3774.29 166.049   4
   1  -1   1 4207.79 166.120   2
  -1   1  -1 4601.39 166.133   2
   1   1   1 3480.82 166.023   9
   1   1   1 3894.58 166.056   8
  -1   1  -1 3664.14 166.048   6
   1   1   1 3649.12 166.046   4
   1   1   1 3508.92 166.072   7
   1   1   1 4033.93 166.119   2
   1   1   1 4014.44 166.086   5
   1   1   1 3687.30 166.030   9
  -3  -1  -1 1830.72 81.2269   7
  -3  -1  -1 1753.45 81.2394   9
   3  -1   1 1841.31 81.2341   4
   3  -1   1 2131.33 81.2458   7
   3  -1   1 1787.17 81.2129   9
   3  -1   1 1852.42 81.2266   6
  -3  -1  -1 1852.48 81.2333   8
  -3  -1  -1 1991.08 81.3404   2
   3  -1   1 1933.35 81.3480   2
  -3  -1  -1 1866.51 81.2249   4
  -3  -1  -1 1872.53 81.2769   9
  -3   1  -1 1825.47 81.2099   9
   3   1   1 1899.47 81.3345   2
   3   1   1 1870.78 81.2236   4
  -3   1  -1 1838.38 81.2310   4
   3   1   1 1801.07 81.2212   7
   3   1   1 1918.92 81.2186   9
  -3   1  -1 1834.90 81.2279   7
  -3   1  -1 2065.43 81.3445   2
  -3   1  -1 2154.01 81.2404   6
   3   1   1 1862.89 81.2049   9
  -3   1  -1 1976.66 81.3531   2
   3   1   1 1850.76 81.2331   8
   3   1   1 1873.67 81.3462   2
  -3   1  -1 1870.90 81.2114   9
  -5  -1  -1 594.913 25.5279   9
  -5  -1  -1 568.686 25.5399   7
  -5  -1  -1 584.356 25.7534   2
   5  -1   1 581.625 25.5563   7
   5  -1   1 602.011 25.5390   9
   5  -1   1 600.200 25.7255   9
  -5  -1  -1 514.239 25.6760   9
  -5  -1  -1 578.559 25.5588   8
   5  -1   1 599.440 25.4657   3
   5  -1   1 614.253 25.7494   2
   5  -1   1 594.363 25.5528   6
  -5  -1  -1 578.587 25.5509   4
   5  -1   1 600.710 25.5528   4
  -5   1  -1 602.799 25.5351   9
  -5   1  -1 624.331 25.7577   2
   5   1   1 547.660 25.6360   3
   5   1   1 610.379 25.5513   4
   5   1   1 616.336 25.7318   2
   5   1   1 595.644 25.5634   8
  -5   1  -1 597.650 25.4701   3
  -5   1  -1 531.287 25.6118   4
  -5   1  -1 600.909 25.5558   7
  -5   1  -1 600.212 25.5525   6
   5   1   1 589.622 25.5430   9
  -5   1  -1 625.996 25.5503   9
  -5   1  -1 593.680 25.6368   8
  -5   1  -1 624.726 25.7212   2
   5   1   1 633.794 25.5387   9
  -7  -1  -1 1019.14 43.3926   3
  -7  -1  -1 1017.43 43.3723   7
  -7  -1  -1 1014.22 43.5986   2
  -7  -1  -1 1018.36 43.3582   9
   7  -1   1 1008.31 43.2900   3
   7  -1   1 1005.17 43.3822   4
   7  -1   1 1046.14 43.6180   2
   7  -1   1 936.579 43.3918   9
   7  -1   1 978.502 43.3886   7
  -7  -1  -1 1008.94 43.3846   4
   7  -1   1 1016.94 43.6387   2
  -7  -1  -1 1012.34 43.4013   8
   7  -1   1 1017.05 43.3773   9
  -7   1  -1 1000.68 43.2964   3
  -7   1  -1 1002.39 43.7052   2
   7   1   1 1031.22 43.6231   2
  -7   1  -1 1011.43 43.3885   7
  -7   1  -1 984.313 43.3777   8
  -7   1  -1 1050.58 43.6094   2
  -7   1  -1 1056.48 43.3909   9
  -7   1  -1 982.696 43.3779   6
  -7   1  -1 1005.74 43.3682   9
   7   1   1 1005.81 43.4003   8
   7   1   1 1015.29 43.3838   4
   7   1   1 1022.96 43.3690   9
   7   1   1 998.917 43.3797   3
   7   1   1 1022.67 43.3878   9
   7   1   1 986.385 43.3636   7
   7   1   1 1015.50 43.6451   2
  -7   1  -1 984.740 43.3696   4
   7   1   1 986.260 43.3623   6
   9  -1   1 52.8848 2.73558   3
  -9  -1  -1 57.4824 3.43711   2
   9  -1   1 57.9783 2.81953   4
   9  -1   1 54.6205 2.81917   8
  -9  -1  -1 54.0651 2.80671   3
  -9  -1  -1 60.7390 2.79446   9
   9  -1   1 58.5957 3.36583   2
  -9  -1  -1 55.2688 2.79381   4
  -9  -1  -1 57.3466 2.82196   7
  -9  -1  -1 56.7042 2.79619   6
   9  -1   1 68.0373 3.35973   2
  -9  -1  -1 56.2262 2.81675   8
   9  -1   1 64.8595 2.85289   7
  -9  -1  -1 62.3280 3.26276   2
   9  -1   1 57.0663 2.81011   6
   9  -1   1 59.5140 2.83526   9
   9  -1   1 56.5834 2.78763   9
  -9   1  -1 63.2618 3.27588   2
  -9   1  -1 59.4777 2.79848   8
  -9   1  -1 63.9085 3.51431   2
  -9   1  -1 61.2151 2.69439   3
  -9   1  -1 50.5983 2.79594   6
   9   1   1 58.1857 2.82165   4
   9   1   1 55.3860 2.82747   8
  -9   1  -1 58.8785 2.80779   9
   9   1   1 60.9716 2.80003   3
   9   1   1 59.1555 2.80804   9
  -9   1  -1 61.9719 2.87772   9
   9   1   1 57.6156 3.34806   2
   9   1   1 57.9777 2.78133   6
   9   1   1 51.0199 3.35301   2
   9   1   1 57.5484 2.78527   7
  -9   1  -1 54.4776 2.77639   4
  -9   1  -1 57.6340 2.84385   7
   9   1   1 59.0448 2.85328   9
  11  -1   1 162.146 7.24490   9
  11  -1   1 164.238 7.09624   3
  11  -1   1 164.902 7.22061   9
 -11  -1  -1 169.538 7.85172   2
 -11  -1  -1 157.289 7.21942   7
  11  -1   1 153.504 7.23722   8
 -11  -1  -1 143.999 7.65763   2
 -11  -1  -1 160.997 7.20215   9
  11  -1   1 153.254 7.22362   6
 -11  -1  -1 159.397 7.22554   3
 -11  -1  -1 163.208 7.28370   9
 -11  -1  -1 159.380 7.21886   6
 -11  -1  -1 158.912 7.22204   4
  11  -1   1 165.532 7.24796   4
  11   1   1 167.039 7.27886   8
  11   1   1 162.642 7.75255   2
 -11   1  -1 157.337 7.21652   9
  11   1   1 160.685 7.23382   4
 -11   1  -1 163.679 7.27041   9
  11   1   1 162.184 7.19896   3
  11   1   1 173.187 7.84401   2
  11   1   1 164.582 7.26623   9
 -11   1  -1 160.015 7.24157   7
 -11   1  -1 158.849 7.23464   6
  11   1   1 164.183 7.20297   6
 -11   1  -1 165.727 7.12392   3
  11   1   1 159.943 7.20315   7
 -11   1  -1 166.066 7.21617   4
  11   1   1 158.417 7.22395   9
 -11   1  -1 161.902 7.84031   2
 -11   1  -1 160.244 7.63984   2
 -11   1  -1 155.130 7.21280   8
 -13  -1  -1 33.3767 2.02696   9
  13  -1   1 32.4828 1.71456   3
  13  -1   1 34.5296 3.01460   2
  13  -1   1 28.3034 2.93292   2
 -13  -1  -1 28.2167 1.97203   6
 -13  -1  -1 32.3546 2.03692   7
  13  -1   1 29.8224 1.95497   9
 -13  -1  -1 30.5678 1.90954   4
  13  -1   1 28.3597 2.00447   8
  13  -1   1 28.4078 1.92424   6
 -13  -1  -1 29.5308 2.69022   2
  13  -1   1 26.1902 2.25025   9
 -13  -1  -1 29.2445 1.92787   8
 -13  -1  -1 36.1769 1.96747   9
 -13  -1  -1 32.6528 1.99142   3
  13  -1   1 36.5569 2.06405   4
 -13   1  -1 31.6814 2.09885   9
 -13   1  -1 27.7160 3.26459   2
  13   1   1 31.3728 2.79504   4
 -13   1  -1 36.1894 2.01110   9
 -13   1  -1 25.4340 2.83370   6
  13   1   1 43.2395 4.28654   2
  13   1   1 33.7903 1.87036   3
 -13   1  -1 30.2292 1.88953   4
  13   1   1 30.2092 3.05048   2
 -13   1  -1 29.3160 2.72597   2
  13   1   1 24.7741 2.92654   8
  13   1   1 33.4017 1.91147   7
  13   1   1 34.5562 2.00739   9
 -13   1  -1 27.3852 2.29359   7
 -13   1  -1 29.4069 1.78776   3
  13   1   1 35.2486 2.12223   9
 -13   1  -1 32.2242 1.92151   8
  13   1   1 33.5713 1.90516   6
  15  -1   1 100.118 4.84539   6
 -15  -1  -1 93.6278 5.79210   2
 -15  -1  -1 97.3745 4.86085   6
  15  -1   1 98.0582 6.25605   2
  15  -1   1 106.090 4.92989   9
  15  -1   1 109.239 4.94675   8
 -15  -1  -1 100.071 6.03433   2
  15  -1   1 103.502 4.65935   3
 -15  -1  -1 104.821 5.46253   9
 -15  -1  -1 97.2087 4.83433   4
 -15  -1  -1 99.9335 4.86550   3
  15  -1   1 99.7322 4.89024   4
 -15  -1  -1 98.8220 4.87545   7
  15  -1   1 108.091 4.88072   9
 -15  -1  -1 93.8085 4.85192   8
 -15  -1  -1 110.027 4.93488   9
  15   1   1 95.8006 4.79632   6
 -15   1  -1 95.5846 4.82551   8
  15   1   1 99.9604 4.89404   4
  15   1   1 95.1891 4.80586   7
 -15   1  -1 104.495 4.94884   9
 -15   1  -1 101.425 6.07312   2
  15   1   1 102.967 4.93638   9
 -15   1  -1 99.7415 4.93149   7
 -15   1  -1 97.4579 4.81267   4
 -15   1  -1 101.431 4.72051   3
  15   1   1 105.220 4.78189   3
  15   1   1 104.776 4.94178   8
  15   1   1 100.309 5.87140   2
  15   1   1 111.816 4.90488   9
  15   1   1 92.1934 5.73149   2
 -15   1  -1 110.546 4.87847   9
 -15   1  -1 99.0315 4.89836   6
  17  -1   1 141.484 6.90057   9
  17  -1   1 146.290 6.94134   8
 -17  -1  -1 161.931 6.87315   9
 -17  -1  -1 145.189 6.88971   6
 -17  -1  -1 131.343 7.57116   2
  17  -1   1 148.218 7.91623   2
 -17  -1  -1 144.210 6.86740   3
 -17  -1  -1 146.673 6.90143   7
  17  -1   1 147.744 6.92070   4
 -17  -1  -1 146.433 6.91653   9
  17  -1   1 143.952 6.85918   9
  17  -1   1 149.121 6.87365   6
 -17  -1  -1 143.261 8.11951   2
  17  -1   1 146.241 7.80936   2
  17  -1   1 150.101 6.65874   3
 -17  -1  -1 142.057 6.84835   4
 -17  -1  -1 144.621 6.87360   8
  17   1   1 149.978 8.01819   2
 -17   1  -1 144.758 7.61739   2
 -17   1  -1 147.513 6.92861   7
  17   1   1 149.242 6.83387   6
 -17   1  -1 156.427 6.86713   8
 -17   1  -1 148.275 6.84352   4
  17   1   1 142.149 6.83112   7
  17   1   1 152.548 6.77965   3
  17   1   1 127.240 6.85434   9
 -17   1  -1 149.244 6.87921   9
 -17   1  -1 150.358 6.95580   9
 -17   1  -1 155.357 6.92036   6
  17   1   1 149.765 6.95522   9
 -17   1  -1 157.621 6.75488   3
  17   1   1 147.369 6.92156   4
  17   1   1 153.033 6.98674   8
  19  -1   1 58.2030 5.77814   2
  19  -1   1 40.4269 2.98152   4
 -19  -1  -1 41.0433 2.72063   8
  19  -1   1 42.0566 2.99660   8
 -19  -1  -1 45.7408 3.05091   7
 -19  -1  -1 42.6442 4.07361   2
 -19  -1  -1 39.7743 2.79362   9
  19  -1   1 42.2524 4.37195   2
  19  -1   1 41.0792 2.42745   3
  19  -1   1 40.7407 3.87959   9
 -19  -1  -1 46.3130 5.18800   2
  19  -1   1 35.2674 2.87673   9
 -19  -1  -1 45.0991 2.91102   3
  19  -1   1 39.8461 2.75858   6
 -19  -1  -1 42.9861 2.76184   4
 -19  -1  -1 43.0967 2.96943   6
 -19  -1  -1 44.4127 2.99351   9
 -19   1  -1 56.1982 4.92638   2
  19   1   1 45.0554 2.74452   6
 -19   1  -1 43.5037 2.74631   4
  19   1   1 45.6809 2.78491   7
  19   1   1 47.8061 3.00213   9
 -19   1  -1 43.3210 3.04738   6
 -19   1  -1 41.3160 2.86079   9
  19   1   1 48.5332 4.93883   2
 -19   1  -1 45.9453 3.12101   7
  19   1   1 47.6319 2.63205   3
  19   1   1 37.6744 2.91468   4
  19   1   1 36.1317 4.44754   2
 -19   1  -1 44.6445 2.68614   3
 -19   1  -1 39.1341 5.36183   2
 -19   1  -1 47.8729 3.04291   9
  19   1   1 43.3413 3.06141   8
 -19   1  -1 46.8654 2.74035   8
 -21  -1  -1 756.199 32.7212   2
  21  -1   1 712.645 31.6122   4
 -21  -1  -1 814.656 32.6965   9
 -21  -1  -1 728.223 31.6021   7
  21  -1   1 747.201 32.5184   2
 -21  -1  -1 714.331 31.5919   6
  21  -1   1 688.973 31.6217   8
 -21  -1  -1 683.441 31.5147   9
  21  -1   1 713.228 31.3771   3
 -21  -1  -1 694.348 31.6038   8
 -21  -1  -1 729.917 32.3037   2
 -21  -1  -1 711.543 31.5613   3
  21  -1   1 740.281 31.6212   6
  21  -1   1 713.221 31.5574   9
 -21  -1  -1 716.685 31.5889   4
  21  -1   1 735.714 32.5034   2
  21  -1   1 700.390 31.6056   9
 -21   1  -1 703.190 31.5927   6
  21   1   1 721.083 31.5533   6
  21   1   1 725.689 31.6435   9
 -21   1  -1 717.384 31.5834   8
 -21   1  -1 728.923 31.4572   3
 -21   1  -1 700.172 31.5556   9
  21   1   1 717.804 31.6642   8
  21   1   1 774.164 32.6154   2
  21   1   1 728.589 31.4850   3
 -21   1  -1 710.813 31.5538   4
  21   1   1 716.400 31.5650   7
  21   1   1 730.217 31.6253   4
 -21   1  -1 709.971 31.6036   7
 -21   1  -1 760.741 32.7549   2
 -21   1  -1 737.315 32.3198   2
 -23  -1  -1 135.255 6.73288   6
 -23  -1  -1 133.489 6.67168   9
  23  -1   1 139.760 6.79227   4
  23  -1   1 133.688 6.20109   3
  23  -1   1 134.318 6.77406   8
  23  -1   1 131.231 6.57546   9
 -23  -1  -1 137.488 6.54820   4
  23  -1   1 143.165 8.56087   2
 -23  -1  -1 121.072 6.49856   8
  23  -1   1 128.526 6.66143   9
 -23  -1  -1 127.021 6.64188   3
 -23  -1  -1 126.415 6.73603   7
  23  -1   1 134.300 6.54990   6
 -23  -1  -1 128.808 6.51264   9
 -23  -1  -1 156.297 9.50956   2
 -23   1  -1 128.204 6.46754   4
 -23   1  -1 144.565 9.61054   2
  23   1   1 119.839 8.17801   2
  23   1   1 121.950 6.86164   9
 -23   1  -1 147.984 6.86982   7
 -23   1  -1 132.149 6.57819   9
  23   1   1 122.117 6.79080   8
  23   1   1 117.087 6.89462   7
  23   1   1 134.723 6.34740   3
  23   1   1 136.093 6.72979   4
 -23   1  -1 138.547 6.46249   3
 -23   1  -1 136.190 7.93418   2
 -23   1  -1 119.412 6.70979   6
 -25  -1  -1 230.937 10.7561   9
  25  -1   1 213.463 10.7351   9
  25  -1   1 231.799 10.8803   8
 -25  -1  -1 226.325 10.6562   4
 -25  -1  -1 218.561 13.2764   2
 -25  -1  -1 226.790 10.7970   6
 -25  -1  -1 221.970 11.9000   2
  25  -1   1 238.074 12.3063   2
  25  -1   1 232.416 10.8581   4
  25  -1   1 203.973 12.5628   2
  25  -1   1 230.588 10.6756   9
  25  -1   1 240.474 10.6843   6
 -25  -1  -1 244.762 10.8883   7
 -25  -1  -1 220.396 10.6253   8
  25  -1   1 233.971 10.3307   3
 -25  -1  -1 209.641 10.5757   9
 -25   1  -1 213.063 13.5250   2
 -25   1  -1 228.447 10.8562   7
 -25   1  -1 229.560 10.5949   4
  25   1   1 225.040 10.5910   6
  25   1   1 232.254 10.4501   3
  25   1   1 228.066 10.9050   8
  25   1   1 231.523 10.7461   9
 -25   1  -1 224.579 10.8138   9
 -25   1  -1 228.621 10.5522   3
  25   1   1 239.337 10.8743   4
 -25   1  -1 237.819 10.8491   6
  25   1   1 224.369 10.8099   9
  25   1   1 231.728 12.9787   2
 -25   1  -1 235.813 10.6450   8
[truncated: 13,457,827 more chars]
