# Supplementary material for: Dinitrogen binding and activation at a molybdenum–iron–sulfur cluster
Source: Springer Nature journal article supplement (doi:10.1038/s41557-021-00701-6), 2021-05-27
Supplement: 41557_2021_701_MOESM5_ESM.mol [file 41557_2021_701_MOESM5_ESM.mol]

nchem.20092070B-comp2.mol
  ChemDraw04082114163D

154175  0  0  0  0  0  0  0  0999 V2000
   -5.7298    5.5954    0.7362 C   0  0  0  0  0  0  0  0  0  0  0  0
   -7.4220    5.5940   -0.3581 C   0  5  0  0  0  0  0  0  0  0  0  0
   -8.8125    4.5420    0.6502 C   0  0  0  0  0  0  0  0  0  0  0  0
   -7.9805    3.8933    2.3664 C   0  0  0  0  0  0  0  0  0  0  0  0
   -6.0753    4.5448    2.4200 C   0  0  0  0  0  0  0  0  0  0  0  0
   -3.9953    6.4923    0.2342 C   0  0  0  0  0  0  0  0  0  0  0  0
   -4.7483    4.2035    3.8965 C   0  0  0  0  0  0  0  0  0  0  0  0
   -8.8943    2.7877    3.7808 C   0  0  0  0  0  0  0  0  0  0  0  0
  -10.7049    4.1993    0.0467 C   0  0  0  0  0  0  0  0  0  0  0  0
   -7.6773    6.4880   -2.1448 C   0  0  0  0  0  0  0  0  0  0  0  0
    5.7298   -5.5954   -1.0155 C   0  0  0  0  0  0  0  0  0  0  0  0
    7.4220   -5.5940   -2.1098 C   0  5  0  0  0  0  0  0  0  0  0  0
    8.8125   -4.5420   -1.1015 C   0  0  0  0  0  0  0  0  0  0  0  0
    7.9805   -3.8933    0.6147 C   0  0  0  0  0  0  0  0  0  0  0  0
    6.0753   -4.5448    0.6683 C   0  0  0  0  0  0  0  0  0  0  0  0
    3.9953   -6.4923   -1.5175 C   0  0  0  0  0  0  0  0  0  0  0  0
    4.7483   -4.2035    2.1448 C   0  0  0  0  0  0  0  0  0  0  0  0
    8.8943   -2.7877    2.0291 C   0  0  0  0  0  0  0  0  0  0  0  0
   10.7049   -4.1993   -1.7050 C   0  0  0  0  0  0  0  0  0  0  0  0
    7.6773   -6.4880   -3.8965 C   0  0  0  0  0  0  0  0  0  0  0  0
   -6.1680   -0.2598    2.1267 Fe  0  0  0  0  0  0  0  0  0  0  0  0
   -4.8523    0.1788    2.1267 S   0  0  0  0  0  0  0  0  0  0  0  0
   -6.1609   -1.6587    2.1267 Fe  0  0  0  0  0  0  0  0  0  0  0  0
   -6.1919    1.6030    2.1267 Mo  0  3  0  0  0  0  0  0  0  0  0  0
   -3.3984   -0.0018    2.1267 Fe  0  0  0  0  0  0  0  0  0  0  0  0
   -8.0054   -0.1653    2.1267 S   0  0  0  0  0  0  0  0  0  0  0  0
   -4.3277   -2.2764    2.1267 S   0  0  0  0  0  0  0  0  0  0  0  0
   -4.3686    1.9584    2.1267 S   0  0  0  0  0  0  0  0  0  0  0  0
   -1.0236    0.0081    2.1267 N   0  0  0  0  0  0  0  0  0  0  0  0
   -6.9007   -5.1646    2.1267 C   0  0  0  0  0  0  0  0  0  0  0  0
   -5.7583   -6.1717    2.1267 N   0  0  0  0  0  0  0  0  0  0  0  0
   -6.3630   -7.5695    2.1267 C   0  0  0  0  0  0  0  0  0  0  0  0
   -7.8793   -7.4263    2.1267 C   0  0  0  0  0  0  0  0  0  0  0  0
   -8.2116   -5.9400    2.1267 N   0  0  0  0  0  0  0  0  0  0  0  0
   -4.0595   -7.3448    2.1267 C   0  0  0  0  0  0  0  0  0  0  0  0
   -2.6434   -6.7843    2.1267 C   0  0  0  0  0  0  0  0  0  0  0  0
   -1.4500   -7.7305    2.1267 C   0  0  0  0  0  0  0  0  0  0  0  0
   -1.6727   -9.2372    2.1267 C   0  0  0  0  0  0  0  0  0  0  0  0
   -3.0888   -9.7976    2.1267 C   0  0  0  0  0  0  0  0  0  0  0  0
   -4.2822   -8.8514    2.1267 C   0  0  0  0  0  0  0  0  0  0  0  0
   -5.6984   -9.4119    2.1267 C   0  0  0  0  0  0  0  0  0  0  0  0
   -6.8918   -8.4657    2.1267 C   0  0  0  0  0  0  0  0  0  0  0  0
   -5.9211  -10.9185    2.1267 C   0  0  0  0  0  0  0  0  0  0  0  0
   -2.4207   -5.2777    2.1267 C   0  0  0  0  0  0  0  0  0  0  0  0
   -1.0046   -4.7173    2.1267 C   0  0  0  0  0  0  0  0  0  0  0  0
   -3.6142   -4.3315    2.1267 C   0  0  0  0  0  0  0  0  0  0  0  0
   -9.5918   -6.8490    2.1267 C   0  0  0  0  0  0  0  0  0  0  0  0
  -10.9638   -6.1878    2.1267 C   0  0  0  0  0  0  0  0  0  0  0  0
  -12.2223   -7.0454    2.1267 C   0  0  0  0  0  0  0  0  0  0  0  0
  -12.1089   -8.5642    2.1267 C   0  0  0  0  0  0  0  0  0  0  0  0
  -10.7369   -9.2254    2.1267 C   0  0  0  0  0  0  0  0  0  0  0  0
   -9.4783   -8.3677    2.1267 C   0  0  0  0  0  0  0  0  0  0  0  0
   -8.1063   -9.0289    2.1267 C   0  0  0  0  0  0  0  0  0  0  0  0
   -7.9929  -10.5477    2.1267 C   0  0  0  0  0  0  0  0  0  0  0  0
   -6.8477   -8.1713    2.1267 C   0  0  0  0  0  0  0  0  0  0  0  0
  -11.0772   -4.6691    2.1267 C   0  0  0  0  0  0  0  0  0  0  0  0
  -12.4492   -4.0079    2.1267 C   0  0  0  0  0  0  0  0  0  0  0  0
   -9.8186   -3.8114    2.1267 C   0  0  0  0  0  0  0  0  0  0  0  0
  -12.6344   -1.7827    2.1267 C   0  0  0  0  0  0  0  0  0  0  0  0
  -13.7397   -2.8305    2.1267 N   0  0  0  0  0  0  0  0  0  0  0  0
  -15.0777   -2.1030    2.1267 C   0  0  0  0  0  0  0  0  0  0  0  0
  -14.7993   -0.6057    2.1267 C   0  0  0  0  0  0  0  0  0  0  0  0
  -13.2893   -0.4077    2.1267 N   0  0  0  0  0  0  0  0  0  0  0  0
  -15.0601   -4.4174    2.1267 C   0  0  0  0  0  0  0  0  0  0  0  0
  -14.6286   -5.8780    2.1267 C   0  0  0  0  0  0  0  0  0  0  0  0
  -15.6778   -6.9819    2.1267 C   0  0  0  0  0  0  0  0  0  0  0  0
  -17.1585   -6.6253    2.1267 C   0  0  0  0  0  0  0  0  0  0  0  0
  -17.5899   -5.1647    2.1267 C   0  0  0  0  0  0  0  0  0  0  0  0
  -16.5407   -4.0607    2.1267 C   0  0  0  0  0  0  0  0  0  0  0  0
  -16.9722   -2.6001    2.1267 C   0  0  0  0  0  0  0  0  0  0  0  0
  -15.9230   -1.4962    2.1267 C   0  0  0  0  0  0  0  0  0  0  0  0
  -18.4528   -2.2435    2.1267 C   0  0  0  0  0  0  0  0  0  0  0  0
  -13.1480   -6.2346    2.1267 C   0  0  0  0  0  0  0  0  0  0  0  0
  -12.7165   -7.6952    2.1267 C   0  0  0  0  0  0  0  0  0  0  0  0
  -12.0988   -5.1307    2.1267 C   0  0  0  0  0  0  0  0  0  0  0  0
  -14.0711    1.0482    2.1267 C   0  0  0  0  0  0  0  0  0  0  0  0
  -13.2898    2.3556    2.1267 C   0  0  0  0  0  0  0  0  0  0  0  0
  -14.0313    3.6859    2.1267 C   0  0  0  0  0  0  0  0  0  0  0  0
  -15.5541    3.7088    2.1267 C   0  0  0  0  0  0  0  0  0  0  0  0
  -16.3354    2.4015    2.1267 C   0  0  0  0  0  0  0  0  0  0  0  0
  -15.5939    1.0712    2.1267 C   0  0  0  0  0  0  0  0  0  0  0  0
  -16.3752   -0.2361    2.1267 C   0  0  0  0  0  0  0  0  0  0  0  0
  -17.8980   -0.2132    2.1267 C   0  0  0  0  0  0  0  0  0  0  0  0
  -15.6337   -1.5664    2.1267 C   0  0  0  0  0  0  0  0  0  0  0  0
  -11.7669    2.3326    2.1267 C   0  0  0  0  0  0  0  0  0  0  0  0
  -10.9856    3.6399    2.1267 C   0  0  0  0  0  0  0  0  0  0  0  0
  -11.0254    1.0023    2.1267 C   0  0  0  0  0  0  0  0  0  0  0  0
    6.1680    0.2598    0.3750 Fe  0  0  0  0  0  0  0  0  0  0  0  0
    4.8523   -0.1788    0.3750 S   0  0  0  0  0  0  0  0  0  0  0  0
    6.1609    1.6587    0.3750 Fe  0  0  0  0  0  0  0  0  0  0  0  0
    6.1919   -1.6030    0.3750 Mo  0  3  0  0  0  0  0  0  0  0  0  0
    3.3984    0.0018    0.3750 Fe  0  0  0  0  0  0  0  0  0  0  0  0
    8.0054    0.1653    0.3750 S   0  0  0  0  0  0  0  0  0  0  0  0
    4.3277    2.2764    0.3750 S   0  0  0  0  0  0  0  0  0  0  0  0
    4.3686   -1.9584    0.3750 S   0  0  0  0  0  0  0  0  0  0  0  0
    1.0236   -0.0081    0.3750 N   0  0  0  0  0  0  0  0  0  0  0  0
    6.9007    5.1646    0.3750 C   0  0  0  0  0  0  0  0  0  0  0  0
    5.7583    6.1717    0.3750 N   0  0  0  0  0  0  0  0  0  0  0  0
    6.3630    7.5695    0.3750 C   0  0  0  0  0  0  0  0  0  0  0  0
    7.8793    7.4263    0.3750 C   0  0  0  0  0  0  0  0  0  0  0  0
    8.2116    5.9400    0.3750 N   0  0  0  0  0  0  0  0  0  0  0  0
    4.0595    7.3448    0.3750 C   0  0  0  0  0  0  0  0  0  0  0  0
    2.6434    6.7843    0.3750 C   0  0  0  0  0  0  0  0  0  0  0  0
    1.4500    7.7305    0.3750 C   0  0  0  0  0  0  0  0  0  0  0  0
    1.6727    9.2372    0.3750 C   0  0  0  0  0  0  0  0  0  0  0  0
    3.0888    9.7976    0.3750 C   0  0  0  0  0  0  0  0  0  0  0  0
    4.2822    8.8514    0.3750 C   0  0  0  0  0  0  0  0  0  0  0  0
    5.6984    9.4119    0.3750 C   0  0  0  0  0  0  0  0  0  0  0  0
    6.8918    8.4657    0.3750 C   0  0  0  0  0  0  0  0  0  0  0  0
    5.9211   10.9185    0.3750 C   0  0  0  0  0  0  0  0  0  0  0  0
    2.4207    5.2777    0.3750 C   0  0  0  0  0  0  0  0  0  0  0  0
    1.0046    4.7173    0.3750 C   0  0  0  0  0  0  0  0  0  0  0  0
    3.6142    4.3315    0.3750 C   0  0  0  0  0  0  0  0  0  0  0  0
    9.5918    6.8490    0.3750 C   0  0  0  0  0  0  0  0  0  0  0  0
   10.9638    6.1878    0.3750 C   0  0  0  0  0  0  0  0  0  0  0  0
   12.2223    7.0454    0.3750 C   0  0  0  0  0  0  0  0  0  0  0  0
   12.1089    8.5642    0.3750 C   0  0  0  0  0  0  0  0  0  0  0  0
   10.7369    9.2254    0.3750 C   0  0  0  0  0  0  0  0  0  0  0  0
    9.4783    8.3677    0.3750 C   0  0  0  0  0  0  0  0  0  0  0  0
    8.1063    9.0289    0.3750 C   0  0  0  0  0  0  0  0  0  0  0  0
    7.9929   10.5477    0.3750 C   0  0  0  0  0  0  0  0  0  0  0  0
    6.8477    8.1713    0.3750 C   0  0  0  0  0  0  0  0  0  0  0  0
   11.0772    4.6691    0.3750 C   0  0  0  0  0  0  0  0  0  0  0  0
   12.4492    4.0079    0.3750 C   0  0  0  0  0  0  0  0  0  0  0  0
    9.8186    3.8114    0.3750 C   0  0  0  0  0  0  0  0  0  0  0  0
   12.6344    1.7827    0.3750 C   0  0  0  0  0  0  0  0  0  0  0  0
   13.7397    2.8305    0.3750 N   0  0  0  0  0  0  0  0  0  0  0  0
   15.0777    2.1030    0.3750 C   0  0  0  0  0  0  0  0  0  0  0  0
   14.7993    0.6057    0.3750 C   0  0  0  0  0  0  0  0  0  0  0  0
   13.2893    0.4077    0.3750 N   0  0  0  0  0  0  0  0  0  0  0  0
   15.0601    4.4174    0.3750 C   0  0  0  0  0  0  0  0  0  0  0  0
   14.6286    5.8780    0.3750 C   0  0  0  0  0  0  0  0  0  0  0  0
   15.6778    6.9819    0.3750 C   0  0  0  0  0  0  0  0  0  0  0  0
   17.1585    6.6253    0.3750 C   0  0  0  0  0  0  0  0  0  0  0  0
   17.5899    5.1647    0.3750 C   0  0  0  0  0  0  0  0  0  0  0  0
   16.5407    4.0607    0.3750 C   0  0  0  0  0  0  0  0  0  0  0  0
   16.9722    2.6001    0.3750 C   0  0  0  0  0  0  0  0  0  0  0  0
   15.9230    1.4962    0.3750 C   0  0  0  0  0  0  0  0  0  0  0  0
   18.4528    2.2435    0.3750 C   0  0  0  0  0  0  0  0  0  0  0  0
   13.1480    6.2346    0.3750 C   0  0  0  0  0  0  0  0  0  0  0  0
   12.7165    7.6952    0.3750 C   0  0  0  0  0  0  0  0  0  0  0  0
   12.0988    5.1307    0.3750 C   0  0  0  0  0  0  0  0  0  0  0  0
   14.0711   -1.0482    0.3750 C   0  0  0  0  0  0  0  0  0  0  0  0
   13.2898   -2.3556    0.3750 C   0  0  0  0  0  0  0  0  0  0  0  0
   14.0313   -3.6859    0.3750 C   0  0  0  0  0  0  0  0  0  0  0  0
   15.5541   -3.7088    0.3750 C   0  0  0  0  0  0  0  0  0  0  0  0
   16.3354   -2.4015    0.3750 C   0  0  0  0  0  0  0  0  0  0  0  0
   15.5939   -1.0712    0.3750 C   0  0  0  0  0  0  0  0  0  0  0  0
   16.3752    0.2361    0.3750 C   0  0  0  0  0  0  0  0  0  0  0  0
   17.8980    0.2132    0.3750 C   0  0  0  0  0  0  0  0  0  0  0  0
   15.6337    1.5664    0.3750 C   0  0  0  0  0  0  0  0  0  0  0  0
   11.7669   -2.3326    0.3750 C   0  0  0  0  0  0  0  0  0  0  0  0
   10.9856   -3.6399    0.3750 C   0  0  0  0  0  0  0  0  0  0  0  0
   11.0254   -1.0023    0.3750 C   0  0  0  0  0  0  0  0  0  0  0  0
  1  2  1  0      
  2  3  1  0      
  3  4  2  0      
  4  5  1  0      
  5  1  2  0      
  1  6  1  0      
  5  7  1  0      
  4  8  1  0      
  3  9  1  0      
  2 10  1  0      
 11 12  1  0      
 12 13  1  0      
 13 14  2  0      
 14 15  1  0      
 15 11  2  0      
 11 16  1  0      
 15 17  1  0      
 14 18  1  0      
 13 19  1  0      
 12 20  1  0      
 21 27  1  0      
 21 28  1  0      
 21 26  1  0      
 25 22  1  0      
 23 22  1  0      
 24 22  1  0      
 24 26  1  0      
 24 28  1  0      
 23 26  1  0      
 25 27  1  0      
 25 28  1  0      
 23 27  1  0      
 25 29  1  0      
 30 31  1  0      
 31 32  1  0      
 32 33  2  0      
 33 34  1  0      
 30 34  1  0      
 35 36  1  0      
 36 37  2  0      
 37 38  1  0      
 38 39  2  0      
 39 40  1  0      
 35 40  2  0      
 41 42  1  0      
 41 43  1  0      
 40 41  1  0      
 44 45  1  0      
 44 46  1  0      
 36 44  1  0      
 31 35  1  0      
 47 48  1  0      
 48 49  2  0      
 49 50  1  0      
 50 51  2  0      
 51 52  1  0      
 47 52  2  0      
 53 54  1  0      
 53 55  1  0      
 52 53  1  0      
 56 57  1  0      
 56 58  1  0      
 48 56  1  0      
 34 47  1  0      
 59 60  1  0      
 60 61  1  0      
 61 62  2  0      
 62 63  1  0      
 59 63  1  0      
 64 65  1  0      
 65 66  2  0      
 66 67  1  0      
 67 68  2  0      
 68 69  1  0      
 64 69  2  0      
 70 71  1  0      
 70 72  1  0      
 69 70  1  0      
 73 74  1  0      
 73 75  1  0      
 65 73  1  0      
 60 64  1  0      
 76 77  1  0      
 77 78  2  0      
 78 79  1  0      
 79 80  2  0      
 80 81  1  0      
 76 81  2  0      
 82 83  1  0      
 82 84  1  0      
 81 82  1  0      
 85 86  1  0      
 85 87  1  0      
 77 85  1  0      
 63 76  1  0      
 23 30  2  0      
 21 59  2  0      
 88 94  1  0      
 88 95  1  0      
 88 93  1  0      
 92 89  1  0      
 90 89  1  0      
 91 89  1  0      
 91 93  1  0      
 91 95  1  0      
 90 93  1  0      
 92 94  1  0      
 92 95  1  0      
 90 94  1  0      
 92 96  1  0      
 97 98  1  0      
 98 99  1  0      
 99100  2  0      
100101  1  0      
 97101  1  0      
102103  1  0      
103104  2  0      
104105  1  0      
105106  2  0      
106107  1  0      
102107  2  0      
108109  1  0      
108110  1  0      
107108  1  0      
111112  1  0      
111113  1  0      
103111  1  0      
 98102  1  0      
114115  1  0      
115116  2  0      
116117  1  0      
117118  2  0      
118119  1  0      
114119  2  0      
120121  1  0      
120122  1  0      
119120  1  0      
123124  1  0      
123125  1  0      
115123  1  0      
101114  1  0      
126127  1  0      
127128  1  0      
128129  2  0      
129130  1  0      
126130  1  0      
131132  1  0      
132133  2  0      
133134  1  0      
134135  2  0      
135136  1  0      
131136  2  0      
137138  1  0      
137139  1  0      
136137  1  0      
140141  1  0      
140142  1  0      
132140  1  0      
127131  1  0      
143144  1  0      
144145  2  0      
145146  1  0      
146147  2  0      
147148  1  0      
143148  2  0      
149150  1  0      
149151  1  0      
148149  1  0      
152153  1  0      
152154  1  0      
144152  1  0      
130143  1  0      
 90 97  2  0      
 88126  2  0      
 29 96  3  0      
M  CHG  4   2  -1  12  -1  24   1  91   1
M  END
