# Supplementary material for: Dinitrogen binding and activation at a molybdenum–iron–sulfur cluster
Source: Springer Nature journal article supplement (doi:10.1038/s41557-021-00701-6), 2021-05-27
Supplement: 41557_2021_701_MOESM8_ESM.mol [file 41557_2021_701_MOESM8_ESM.mol]

nchem.20092070B-comp3.mol
  ChemDraw04082114163D

104114  0  0  0  0  0  0  0  0999 V2000
   -1.2050    7.6849   -0.1396 C   0  0  0  0  0  0  0  0  0  0  0  0
   -2.8972    7.6835   -1.2339 C   0  5  0  0  0  0  0  0  0  0  0  0
   -4.2877    6.6315   -0.2256 C   0  0  0  0  0  0  0  0  0  0  0  0
   -3.4557    5.9828    1.4906 C   0  0  0  0  0  0  0  0  0  0  0  0
   -1.5505    6.6343    1.5442 C   0  0  0  0  0  0  0  0  0  0  0  0
    0.5295    8.5818   -0.6416 C   0  0  0  0  0  0  0  0  0  0  0  0
   -0.2235    6.2930    3.0206 C   0  0  0  0  0  0  0  0  0  0  0  0
   -4.3695    4.8772    2.9050 C   0  0  0  0  0  0  0  0  0  0  0  0
   -6.1801    6.2888   -0.8292 C   0  0  0  0  0  0  0  0  0  0  0  0
   -3.1525    8.5775   -3.0206 C   0  0  0  0  0  0  0  0  0  0  0  0
   -1.6432    1.8297    1.2508 Fe  0  0  0  0  0  0  0  0  0  0  0  0
   -0.3275    2.2683    1.2508 S   0  0  0  0  0  0  0  0  0  0  0  0
   -1.6361    0.4308    1.2508 Fe  0  0  0  0  0  0  0  0  0  0  0  0
   -1.6672    3.6925    1.2508 Mo  0  3  0  0  0  0  0  0  0  0  0  0
    1.1264    2.0877    1.2508 Fe  0  0  0  0  0  0  0  0  0  0  0  0
   -3.4807    1.9242    1.2508 S   0  0  0  0  0  0  0  0  0  0  0  0
    0.1971   -0.1869    1.2508 S   0  0  0  0  0  0  0  0  0  0  0  0
    0.1562    4.0479    1.2508 S   0  0  0  0  0  0  0  0  0  0  0  0
    3.5012    2.0976    1.2508 N   0  0  0  0  0  0  0  0  0  0  0  0
   -2.3759   -3.0751    1.2508 C   0  0  0  0  0  0  0  0  0  0  0  0
   -1.2335   -4.0822    1.2508 N   0  0  0  0  0  0  0  0  0  0  0  0
   -1.8382   -5.4800    1.2508 C   0  0  0  0  0  0  0  0  0  0  0  0
   -3.3545   -5.3368    1.2508 C   0  0  0  0  0  0  0  0  0  0  0  0
   -3.6868   -3.8505    1.2508 N   0  0  0  0  0  0  0  0  0  0  0  0
    0.4652   -5.2553    1.2508 C   0  0  0  0  0  0  0  0  0  0  0  0
    1.8814   -4.6948    1.2508 C   0  0  0  0  0  0  0  0  0  0  0  0
    3.0748   -5.6410    1.2508 C   0  0  0  0  0  0  0  0  0  0  0  0
    2.8521   -7.1477    1.2508 C   0  0  0  0  0  0  0  0  0  0  0  0
    1.4360   -7.7081    1.2508 C   0  0  0  0  0  0  0  0  0  0  0  0
    0.2426   -6.7619    1.2508 C   0  0  0  0  0  0  0  0  0  0  0  0
   -1.1736   -7.3224    1.2508 C   0  0  0  0  0  0  0  0  0  0  0  0
   -2.3670   -6.3762    1.2508 C   0  0  0  0  0  0  0  0  0  0  0  0
   -1.3963   -8.8290    1.2508 C   0  0  0  0  0  0  0  0  0  0  0  0
    2.1041   -3.1882    1.2508 C   0  0  0  0  0  0  0  0  0  0  0  0
    3.5202   -2.6278    1.2508 C   0  0  0  0  0  0  0  0  0  0  0  0
    0.9106   -2.2420    1.2508 C   0  0  0  0  0  0  0  0  0  0  0  0
   -5.0670   -4.7595    1.2508 C   0  0  0  0  0  0  0  0  0  0  0  0
   -6.4390   -4.0983    1.2508 C   0  0  0  0  0  0  0  0  0  0  0  0
   -7.6975   -4.9559    1.2508 C   0  0  0  0  0  0  0  0  0  0  0  0
   -7.5841   -6.4747    1.2508 C   0  0  0  0  0  0  0  0  0  0  0  0
   -6.2121   -7.1359    1.2508 C   0  0  0  0  0  0  0  0  0  0  0  0
   -4.9535   -6.2782    1.2508 C   0  0  0  0  0  0  0  0  0  0  0  0
   -3.5815   -6.9394    1.2508 C   0  0  0  0  0  0  0  0  0  0  0  0
   -3.4681   -8.4582    1.2508 C   0  0  0  0  0  0  0  0  0  0  0  0
   -2.3229   -6.0818    1.2508 C   0  0  0  0  0  0  0  0  0  0  0  0
   -6.5524   -2.5796    1.2508 C   0  0  0  0  0  0  0  0  0  0  0  0
   -7.9244   -1.9184    1.2508 C   0  0  0  0  0  0  0  0  0  0  0  0
   -5.2938   -1.7219    1.2508 C   0  0  0  0  0  0  0  0  0  0  0  0
   -8.1096    0.3068    1.2508 C   0  0  0  0  0  0  0  0  0  0  0  0
   -9.2149   -0.7410    1.2508 N   0  0  0  0  0  0  0  0  0  0  0  0
  -10.5529   -0.0135    1.2508 C   0  0  0  0  0  0  0  0  0  0  0  0
  -10.2745    1.4838    1.2508 C   0  0  0  0  0  0  0  0  0  0  0  0
   -8.7645    1.6818    1.2508 N   0  0  0  0  0  0  0  0  0  0  0  0
  -10.5353   -2.3279    1.2508 C   0  0  0  0  0  0  0  0  0  0  0  0
  -10.1038   -3.7885    1.2508 C   0  0  0  0  0  0  0  0  0  0  0  0
  -11.1530   -4.8924    1.2508 C   0  0  0  0  0  0  0  0  0  0  0  0
  -12.6337   -4.5358    1.2508 C   0  0  0  0  0  0  0  0  0  0  0  0
  -13.0651   -3.0752    1.2508 C   0  0  0  0  0  0  0  0  0  0  0  0
  -12.0159   -1.9712    1.2508 C   0  0  0  0  0  0  0  0  0  0  0  0
  -12.4474   -0.5106    1.2508 C   0  0  0  0  0  0  0  0  0  0  0  0
  -11.3982    0.5933    1.2508 C   0  0  0  0  0  0  0  0  0  0  0  0
  -13.9280   -0.1540    1.2508 C   0  0  0  0  0  0  0  0  0  0  0  0
   -8.6232   -4.1451    1.2508 C   0  0  0  0  0  0  0  0  0  0  0  0
   -8.1917   -5.6057    1.2508 C   0  0  0  0  0  0  0  0  0  0  0  0
   -7.5740   -3.0412    1.2508 C   0  0  0  0  0  0  0  0  0  0  0  0
   -9.5463    3.1377    1.2508 C   0  0  0  0  0  0  0  0  0  0  0  0
   -8.7650    4.4451    1.2508 C   0  0  0  0  0  0  0  0  0  0  0  0
   -9.5065    5.7754    1.2508 C   0  0  0  0  0  0  0  0  0  0  0  0
  -11.0293    5.7983    1.2508 C   0  0  0  0  0  0  0  0  0  0  0  0
  -11.8106    4.4910    1.2508 C   0  0  0  0  0  0  0  0  0  0  0  0
  -11.0691    3.1607    1.2508 C   0  0  0  0  0  0  0  0  0  0  0  0
  -11.8504    1.8534    1.2508 C   0  0  0  0  0  0  0  0  0  0  0  0
  -13.3732    1.8763    1.2508 C   0  0  0  0  0  0  0  0  0  0  0  0
  -11.1089    0.5231    1.2508 C   0  0  0  0  0  0  0  0  0  0  0  0
   -7.2422    4.4221    1.2508 C   0  0  0  0  0  0  0  0  0  0  0  0
   -6.4609    5.7294    1.2508 C   0  0  0  0  0  0  0  0  0  0  0  0
   -6.5006    3.0918    1.2508 C   0  0  0  0  0  0  0  0  0  0  0  0
    5.5484    2.0814   -0.5009 N   0  0  0  0  0  0  0  0  0  0  0  0
    7.9100    2.1011    1.2508 Ti  0  2  0  0  0  0  0  0  0  0  0  0
    8.3941    5.9037    1.2508 C   0  0  0  0  0  0  0  0  0  0  0  0
   10.2765    5.9021    1.2508 C   0  5  0  0  0  0  0  0  0  0  0  0
   11.8239    4.7321    1.2508 C   0  0  0  0  0  0  0  0  0  0  0  0
    8.7778    4.7337    1.2508 C   0  0  0  0  0  0  0  0  0  0  0  0
    6.4645    6.9007    1.2508 C   0  0  0  0  0  0  0  0  0  0  0  0
    7.3027    4.3547    1.2508 C   0  0  0  0  0  0  0  0  0  0  0  0
   13.9280    4.3500    1.2508 C   0  0  0  0  0  0  0  0  0  0  0  0
   10.8977    4.0103    1.2508 C   0  0  0  0  0  0  0  0  0  0  0  0
   11.9151    2.7790    1.2508 C   0  0  0  0  0  0  0  0  0  0  0  0
   10.6933    7.3656    1.2508 Si  0  0  0  0  0  0  0  0  0  0  0  0
   12.1691    7.7363    1.2508 C   0  0  0  0  0  0  0  0  0  0  0  0
   11.1101    8.8290    1.2508 C   0  0  0  0  0  0  0  0  0  0  0  0
    9.6173    8.4415    1.2508 C   0  0  0  0  0  0  0  0  0  0  0  0
    7.8441   -1.2167    1.2508 C   0  0  0  0  0  0  0  0  0  0  0  0
    9.7246   -1.2151    1.2508 C   0  5  0  0  0  0  0  0  0  0  0  0
   11.2721   -0.0447    1.2508 C   0  0  0  0  0  0  0  0  0  0  0  0
   10.3467    0.6764    1.2508 C   0  0  0  0  0  0  0  0  0  0  0  0
    8.2290   -0.0479    1.2508 C   0  0  0  0  0  0  0  0  0  0  0  0
    6.7538    0.3308    1.2508 C   0  0  0  0  0  0  0  0  0  0  0  0
   11.3616    1.9049    1.2508 C   0  0  0  0  0  0  0  0  0  0  0  0
   13.3741    0.3355    1.2508 C   0  0  0  0  0  0  0  0  0  0  0  0
   10.1431   -2.6765    1.2508 Si  0  0  0  0  0  0  0  0  0  0  0  0
    9.0682   -3.7514    1.2508 C   0  0  0  0  0  0  0  0  0  0  0  0
   10.5366   -4.1448    1.2508 C   0  0  0  0  0  0  0  0  0  0  0  0
   11.6115   -3.0699    1.2508 C   0  0  0  0  0  0  0  0  0  0  0  0
  1  2  1  0      
  2  3  1  0      
  3  4  2  0      
  4  5  1  0      
  5  1  2  0      
  1  6  1  0      
  5  7  1  0      
  4  8  1  0      
  3  9  1  0      
  2 10  1  0      
 11 17  1  0      
 11 18  1  0      
 11 16  1  0      
 15 12  1  0      
 13 12  1  0      
 14 12  1  0      
 14 16  1  0      
 14 18  1  0      
 13 16  1  0      
 15 17  1  0      
 15 18  1  0      
 13 17  1  0      
 15 19  1  0      
 20 21  1  0      
 21 22  1  0      
 22 23  2  0      
 23 24  1  0      
 20 24  1  0      
 25 26  1  0      
 26 27  2  0      
 27 28  1  0      
 28 29  2  0      
 29 30  1  0      
 25 30  2  0      
 31 32  1  0      
 31 33  1  0      
 30 31  1  0      
 34 35  1  0      
 34 36  1  0      
 26 34  1  0      
 21 25  1  0      
 37 38  1  0      
 38 39  2  0      
 39 40  1  0      
 40 41  2  0      
 41 42  1  0      
 37 42  2  0      
 43 44  1  0      
 43 45  1  0      
 42 43  1  0      
 46 47  1  0      
 46 48  1  0      
 38 46  1  0      
 24 37  1  0      
 49 50  1  0      
 50 51  1  0      
 51 52  2  0      
 52 53  1  0      
 49 53  1  0      
 54 55  1  0      
 55 56  2  0      
 56 57  1  0      
 57 58  2  0      
 58 59  1  0      
 54 59  2  0      
 60 61  1  0      
 60 62  1  0      
 59 60  1  0      
 63 64  1  0      
 63 65  1  0      
 55 63  1  0      
 50 54  1  0      
 66 67  1  0      
 67 68  2  0      
 68 69  1  0      
 69 70  2  0      
 70 71  1  0      
 66 71  2  0      
 72 73  1  0      
 72 74  1  0      
 71 72  1  0      
 75 76  1  0      
 75 77  1  0      
 67 75  1  0      
 53 66  1  0      
 13 20  2  0      
 11 49  2  0      
 19 78  2  0      
 78 79  1  0      
 80 81  1  0      
 81 82  1  0      
 82 87  2  0      
 87 83  1  0      
 83 80  2  0      
 80 84  1  0      
 83 85  1  0      
 82 86  1  0      
 81 89  1  0      
 87 88  1  0      
 89 90  1  0      
 89 91  1  0      
 89 92  1  0      
 93 94  1  0      
 94 95  1  0      
 95 96  2  0      
 96 97  1  0      
 97 93  2  0      
 97 98  1  0      
 96 99  1  0      
 95100  1  0      
 94101  1  0      
101102  1  0      
101103  1  0      
101104  1  0      
M  CHG  5   2  -1  14   1  79   2  81  -1  94  -1
M  END
